# Supplementary material
Source: Research Square preprint supplement (doi:10.21203/rs.3.rs-8065309/v1)
Supplement: Supplementary file 1 [file 64e6ad9147c505dd7e39b5d5.xlsx]

## Sheet: Tuberculosis medical record inf
class0	class1	序号	病案类别	首诊断地区	首诊断单位	首管理地区	首管理单位	登记号	患者姓名	年龄	性别	民族	人群分类	现地址类型	现地址国标	症状	患者来源	本次症状出现日期	本次首诊日期	就诊时间	HIV检查结果	HIV检查时间	现诊断地区	现诊断单位	现管理地区	现管理单位	患者项目类别	既往抗结核治疗史	本次确诊日期	患者诊断分型	诊断结果	合并症	诊断医生	登记日期	登记分类	治疗分类	下次检查时间	录入日期	是否基层管理	第一次入户访视时间	应服药次数	实际服药次数	应访视次数	实际访视次数	是否接受抗结核治疗	服药管理地区	服药管理单位	实际服药管理方式	停止治疗原因
		1	普通病案	湖北省武汉市新洲区	新洲区疾病预防控制中心	湖北省武汉市新洲区	新洲区疾病预防控制中心	420117002-2012-00005	1	16	女性	汉族	学生	本县区	420117006		直接就诊	2011-12-23	2012-01-01	9	阴性	2012-01-01	湖北省武汉市新洲区	新洲区疾病预防控制中心	湖北省武汉市新洲区	新洲区疾病预防控制中心			2012-01-01 15	继发	病原学阳性		张念中	2012-01-01	新患者	初治		2012-01-01							治疗	湖北省武汉市新洲区	新洲区三店街卫生院		治愈
		2	普通病案	湖北省武汉市洪山区	洪山区疾病预防控制中心	湖北省武汉市洪山区	洪山区疾病预防控制中心	420111016-2012-00003	2	19	女性	汉族	学生	本县区	420111003		转诊	2011-12-02	2011-12-15	13			湖北省武汉市洪山区	洪山区疾病预防控制中心	湖北省武汉市洪山区	洪山区疾病预防控制中心			2012-01-04 09	继发	病原学阴性		李仁惠	2012-01-04	新患者	初治		2012-01-04							治疗	湖北省武汉市洪山区	湖北工业大学医院		完成疗程
		3	普通病案	湖北省武汉市洪山区	洪山区疾病预防控制中心	湖北省武汉市洪山区	洪山区疾病预防控制中心	420111016-2012-00001	3	20	男性	汉族	学生	本县区	420111003		转诊	2011-11-29	2011-12-14	15	阴性	2011-12-20	湖北省武汉市洪山区	洪山区疾病预防控制中心	湖北省武汉市洪山区	洪山区疾病预防控制中心			2012-01-04 09	继发	病原学阳性		吴杰	2012-01-04	新患者	初治		2012-01-04							治疗	湖北省武汉市洪山区	湖北工业大学医院		其他
		4	普通病案	湖北省武汉市洪山区	洪山区疾病预防控制中心	湖北省武汉市洪山区	洪山区疾病预防控制中心	420111016-2012-00002	4	21	女性	汉族	学生	本县区	420111002		转诊	2011-12-09	2011-12-15	6	阴性	2012-01-04	湖北省武汉市洪山区	洪山区疾病预防控制中心	湖北省武汉市洪山区	洪山区疾病预防控制中心			2012-01-04 09	继发	病原学阴性		李杰	2012-01-04	新患者	初治		2012-01-04							治疗	湖北省武汉市洪山区	中国地质大学医院		完成疗程
		5	普通病案	湖北省武汉市洪山区	洪山区疾病预防控制中心	湖北省武汉市洪山区	洪山区疾病预防控制中心	420111016-2012-00007	5	25	男性	汉族	学生	本县区	420111002		转诊	2011-11-24	2011-12-20	26	阴性	2012-01-04	湖北省武汉市洪山区	洪山区疾病预防控制中心	湖北省武汉市洪山区	洪山区疾病预防控制中心			2012-01-04 16	继发	病原学阴性		李杰	2012-01-04	新患者	初治		2012-01-04							治疗	湖北省武汉市洪山区	武汉市第三医院光谷院区		完成疗程
		6	普通病案	湖北省武汉市洪山区	洪山区疾病预防控制中心	湖北省武汉市洪山区	洪山区疾病预防控制中心	420111016-2012-00029	6	18	女性	汉族	学生	本县区	420111003		追踪	2011-11-12	2011-12-02	20	阴性	2012-01-05	湖北省武汉市洪山区	洪山区疾病预防控制中心	湖北省武汉市洪山区	洪山区疾病预防控制中心			2012-01-05 10	继发	病原学阴性		李仁惠	2012-01-05	新患者	初治		2012-01-05							治疗	湖北省武汉市洪山区	湖北工业大学医院		完成疗程
		7	普通病案	湖北省武汉市洪山区	洪山区疾病预防控制中心	湖北省武汉市洪山区	洪山区疾病预防控制中心	420111016-2012-00010	7	22	男性	汉族	学生	本县区	420111011		转诊	2011-11-12	2011-12-22	40	阴性	2012-01-05	湖北省武汉市洪山区	洪山区疾病预防控制中心	湖北省武汉市洪山区	洪山区疾病预防控制中心			2012-01-05 09	继发	病原学阴性		李杰	2012-01-05	新患者	初治		2012-01-05							治疗	湖北省武汉市洪山区	武汉市洪山区张家湾街社区卫生中心		完成疗程
		8	普通病案	湖北省武汉市洪山区	洪山区疾病预防控制中心	湖北省武汉市洪山区	洪山区疾病预防控制中心	420111016-2012-00020	8	15	女性	汉族	学生	本县区	420111011		转诊	2011-06-19	2011-12-31	195			湖北省武汉市洪山区	洪山区疾病预防控制中心	湖北省武汉市洪山区	洪山区疾病预防控制中心			2012-01-05 09	继发	病原学阳性		吴杰	2012-01-05	新患者	初治		2012-01-05							治疗	湖北省武汉市洪山区	武汉市洪山区张家湾街社区卫生中心		其他
		9	普通病案	湖北省武汉市洪山区	洪山区疾病预防控制中心	湖北省武汉市洪山区	洪山区疾病预防控制中心	420111016-2012-00027	9	22	女性	汉族	学生	本县区	420111002		转诊	2011-12-02	2011-12-14	12			湖北省武汉市洪山区	洪山区疾病预防控制中心	湖北省武汉市洪山区	洪山区疾病预防控制中心			2012-01-05 11	继发	病原学阴性		李仁惠	2012-01-05	新患者	初治		2012-01-05							治疗	湖北省武汉市洪山区	洪山区疾病预防控制中心		完成疗程
		10	普通病案	湖北省武汉市洪山区	洪山区疾病预防控制中心	湖北省武汉市洪山区	洪山区疾病预防控制中心	420111016-2012-00012	10	24	男性	汉族	学生	本县区	420111001		转诊	2011-12-20	2011-12-24	4	阴性	2012-01-05	湖北省武汉市洪山区	洪山区疾病预防控制中心	湖北省武汉市洪山区	洪山区疾病预防控制中心			2012-01-05 09	继发	病原学阴性		李仁惠	2012-01-05	新患者	初治		2012-01-05							治疗	湖北省武汉市洪山区	洪山区珞南街理工大社区卫生服务中心		完成疗程
		11	普通病案	湖北省武汉市洪山区	洪山区疾病预防控制中心	湖北省武汉市洪山区	洪山区疾病预防控制中心	420111016-2012-00026	11	19	男性	汉族	学生	本县区	420111002		追踪	2011-11-09	2011-12-14	35	阴性	2012-01-05	湖北省武汉市洪山区	洪山区疾病预防控制中心	湖北省武汉市洪山区	洪山区疾病预防控制中心			2012-01-05 10	继发	病原学阴性		李杰	2012-01-05	新患者	初治		2012-01-05							治疗	湖北省武汉市洪山区	武汉市第三医院光谷院区		完成疗程
		12	普通病案	湖北省武汉市洪山区	洪山区疾病预防控制中心	湖北省武汉市洪山区	洪山区疾病预防控制中心	420111016-2012-00019	12	20	男性	汉族	学生	本县区	420111001		转诊	2011-12-20	2011-12-31	11			湖北省武汉市洪山区	洪山区疾病预防控制中心	湖北省武汉市洪山区	洪山区疾病预防控制中心			2012-01-05 09	继发	病原学阴性		李杰	2012-01-05	新患者	初治		2012-01-05							治疗	湖北省武汉市洪山区	洪山区珞南街华中师范大学医院		完成疗程
		13	普通病案	湖北省武汉市洪山区	洪山区疾病预防控制中心	湖北省武汉市洪山区	洪山区疾病预防控制中心	420111016-2012-00028	13	22	女性	汉族	学生	本县区	420111002		转诊	2011-11-17	2011-11-18	1	阴性	2012-01-05	湖北省武汉市洪山区	洪山区疾病预防控制中心	湖北省武汉市洪山区	洪山区疾病预防控制中心			2012-01-05 09	继发	病原学阴性		李杰	2012-01-05	新患者	初治		2012-01-05							治疗	湖北省武汉市洪山区	洪山区疾病预防控制中心		完成疗程
		14	普通病案	湖北省武汉市洪山区	洪山区疾病预防控制中心	湖北省武汉市洪山区	洪山区疾病预防控制中心	420111016-2012-00016	14	18	女性	汉族	学生	本县区	420111001		转诊	2011-12-24	2011-12-27	3	阴性	2012-01-05	湖北省武汉市洪山区	洪山区疾病预防控制中心	湖北省武汉市洪山区	洪山区疾病预防控制中心			2012-01-05 09	继发	病原学阴性		李杰	2012-01-05	新患者	初治		2012-01-05							治疗	湖北省武汉市洪山区	洪山区疾病预防控制中心		完成疗程
		15	普通病案	湖北省武汉市洪山区	洪山区疾病预防控制中心	湖北省武汉市洪山区	洪山区疾病预防控制中心	420111016-2012-00014	15	21	男性	汉族	学生	本县区	420111001		转诊	2011-12-08	2011-12-27	19	阴性	2012-01-05	湖北省武汉市洪山区	洪山区疾病预防控制中心	湖北省武汉市洪山区	洪山区疾病预防控制中心			2012-01-05 09	继发	病原学阴性		李杰	2012-01-05	新患者	初治		2012-01-05							治疗	湖北省武汉市洪山区	洪山区珞南街理工大社区卫生服务中心		完成疗程
		16	普通病案	湖北省武汉市武昌区	武昌区疾病预防控制中心	湖北省武汉市武昌区	武昌区疾病预防控制中心	420106010-2012-00003	16	18	女性	汉族	学生	本县区	420106015		追踪	2011-11-14	2011-12-14	30	阴性	2012-01-06	湖北省武汉市武昌区	武昌区疾病预防控制中心	湖北省武汉市武昌区	武昌区疾病预防控制中心			2012-01-06 10	继发	病原学阳性		刘文	2012-01-06	新患者	初治		2012-01-06							治疗				治愈
		17	普通病案	湖北省武汉市武昌区	武昌区疾病预防控制中心	湖北省武汉市武昌区	武昌区疾病预防控制中心	420106010-2012-00002	17	22	女性	汉族	学生	本县区	420106013		直接就诊	2012-01-02	2012-01-06	4	阴性	2012-01-06	湖北省武汉市武昌区	武昌区疾病预防控制中心	湖北省武汉市武昌区	武昌区疾病预防控制中心			2012-01-06 11	继发	病原学阴性		刘文	2012-01-06	新患者	初治		2012-01-06							治疗				丢失
		18	普通病案	湖北省武汉市青山区	青山区结核病防治所	湖北省武汉市青山区	青山区结核病防治所	420107018-2012-00008	18	22	男性	汉族	学生	本县区	420107001		直接就诊	2011-12-19	2011-12-27	8			湖北省武汉市青山区	青山区结核病防治所	湖北省武汉市青山区	青山区结核病防治所			2012-01-06 08	继发	病原学阳性		郑和平	2012-01-06	新患者	初治		2012-01-06							治疗	湖北省武汉市青山区	青山区结核病防治所		治愈
		19	普通病案	湖北省武汉市硚口区	武汉市结核病防治所	湖北省武汉市硚口区	武汉市结核病防治所	420104019-2012-00016	19	13	男性	汉族	学生	本县区	420104005		转诊	2011-12-22	2012-01-05	14			湖北省武汉市硚口区	武汉市结核病防治所	湖北省武汉市硚口区	武汉市结核病防治所			2012-01-06 10	继发	病原学阴性		李春清	2012-01-06	新患者	初治		2012-01-06							治疗	湖北省武汉市硚口区	武汉市结核病防治所		完成疗程
		20	普通病案	湖北省武汉市黄陂区	武汉市黄陂区疾病预防控制中心	湖北省武汉市黄陂区	武汉市黄陂区疾病预防控制中心	420116003-2012-00013	20	24	男性	汉族	学生	本县区	420116005		转诊	2011-12-25	2012-01-08	14			湖北省武汉市黄陂区	武汉市黄陂区疾病预防控制中心	湖北省武汉市黄陂区	武汉市黄陂区疾病预防控制中心			2012-01-09 07	继发	病原学阴性		蔡逸民	2012-01-09	新患者	初治		2012-01-09							治疗	湖北省武汉市黄陂区	武汉市黄陂区滠口街道卫生院		完成疗程
		21	普通病案	湖北省武汉市洪山区	洪山区疾病预防控制中心	湖北省武汉市洪山区	洪山区疾病预防控制中心	420111016-2012-00033	21	23	男性	汉族	学生	本县区	420111002		转诊	2012-01-01	2012-01-04	3	阴性	2012-01-09	湖北省武汉市洪山区	洪山区疾病预防控制中心	湖北省武汉市洪山区	洪山区疾病预防控制中心			2012-01-09 09	继发	病原学阳性		李仁惠	2012-01-09	新患者	初治		2012-01-09							治疗	湖北省武汉市洪山区	中国地质大学医院		治愈
		22	普通病案	湖北省武汉市洪山区	洪山区疾病预防控制中心	湖北省武汉市洪山区	洪山区疾病预防控制中心	420111016-2012-00034	22	24	女性	汉族	学生	本县区	420111003		追踪	2011-11-21	2011-12-07	16	阴性	2012-01-09	湖北省武汉市洪山区	洪山区疾病预防控制中心	湖北省武汉市洪山区	洪山区疾病预防控制中心			2012-01-10 09	继发	病原学阳性		李仁惠	2012-01-10	新患者	初治		2012-01-10							治疗	湖北省武汉市洪山区	湖北工业大学医院		治愈
		23	普通病案	湖北省武汉市黄陂区	武汉市黄陂区疾病预防控制中心	湖北省武汉市黄陂区	武汉市黄陂区疾病预防控制中心	420116003-2012-00018	23	21	女性	汉族	学生	本市其它县区	420116010		追踪	2011-12-10	2012-01-04	25			湖北省武汉市黄陂区	武汉市黄陂区疾病预防控制中心	湖北省武汉市黄陂区	武汉市黄陂区疾病预防控制中心			2012-01-11 10	继发	病原学阴性		阮爱华	2012-01-11	新患者	初治		2012-01-11							治疗	湖北省武汉市黄陂区	武汉市黄陂区长轩岭街道中心卫生院		完成疗程
		24	普通病案	湖北省武汉市青山区	青山区结核病防治所	湖北省武汉市青山区	青山区结核病防治所	420107018-2012-00019	24	21	女性	汉族	学生	本市其它县区	420107001		转诊	2011-12-14	2011-12-24	10	阴性	2012-01-12	湖北省武汉市青山区	青山区结核病防治所	湖北省武汉市青山区	青山区结核病防治所			2012-01-12 08	继发	病原学阴性		郑和平	2012-01-12	新患者	初治		2012-01-12							治疗	湖北省武汉市青山区	青山区结核病防治所		完成疗程
		25	普通病案	湖北省武汉市东西湖区	东西湖区结核病防治所	湖北省武汉市东西湖区	东西湖区结核病防治所	420112019-2012-00003	25	18	女性	汉族	学生	本县区	420112007		追踪	2011-12-01	2012-01-12	42	阴性	2012-01-12	湖北省武汉市东西湖区	东西湖区结核病防治所	湖北省武汉市东西湖区	东西湖区结核病防治所			2012-01-12 16	继发	病原学阴性		孟刚	2012-01-12	新患者	初治		2012-01-12							治疗	湖北省武汉市东西湖区	东西湖区径何街卫生院		完成疗程
		26	普通病案	湖北省武汉市蔡甸区	武汉市蔡甸区疾病预防控制中心	湖北省武汉市蔡甸区	武汉市蔡甸区疾病预防控制中心	420114003-2012-00009	26	17	男性	汉族	学生	本县区	420114002		转诊	2011-12-13	2012-01-13	31			湖北省武汉市蔡甸区	武汉市蔡甸区疾病预防控制中心	湖北省武汉市蔡甸区	武汉市蔡甸区疾病预防控制中心			2012-01-13 10	继发	病原学阳性		刘晓燕	2012-01-13	新患者	初治		2012-01-13							治疗	湖北省武汉市蔡甸区	武汉市蔡甸区奓山街卫生院		治愈
		27	普通病案	湖北省武汉市洪山区	洪山区疾病预防控制中心	湖北省武汉市洪山区	洪山区疾病预防控制中心	420111016-2012-00039	27	16	男性	汉族	学生	本县区	420111002		转诊	2012-01-02	2012-01-09	7	阴性	2012-01-13	湖北省武汉市洪山区	洪山区疾病预防控制中心	湖北省武汉市洪山区	洪山区疾病预防控制中心			2012-01-13 10	继发	病原学阴性		李仁惠	2012-01-13	新患者	初治		2012-01-13							治疗	湖北省武汉市洪山区	洪山区关山街华中科技大学医院		完成疗程
		28	普通病案	湖北省武汉市洪山区	洪山区疾病预防控制中心	湖北省武汉市洪山区	洪山区疾病预防控制中心	420111016-2012-00043	28	25	女性	汉族	学生	本县区	420111006		转诊	2012-01-04	2012-01-11	7	阴性	2012-01-13	湖北省武汉市洪山区	洪山区疾病预防控制中心	湖北省武汉市洪山区	洪山区疾病预防控制中心			2012-01-13 14	继发	病原学阳性		李仁惠	2012-01-13	新患者	初治		2012-01-13							治疗	湖北省武汉市洪山区	洪山区疾病预防控制中心		治愈
		29	普通病案	湖北省武汉市洪山区	洪山区疾病预防控制中心	湖北省武汉市洪山区	洪山区疾病预防控制中心	420111016-2012-00036	29	24	男性	汉族	学生	本县区	420111008		转诊	2012-01-06	2012-01-09	3	阴性	2012-01-13	湖北省武汉市洪山区	洪山区疾病预防控制中心	湖北省武汉市洪山区	洪山区疾病预防控制中心			2012-01-13 14	继发	病原学阳性		吴杰	2012-01-13	新患者	初治		2012-01-13							治疗	湖北省武汉市洪山区	洪山区和平街社区卫生服务中心		治愈
		30	普通病案	湖北省武汉市洪山区	洪山区疾病预防控制中心	湖北省武汉市洪山区	洪山区疾病预防控制中心	420111016-2012-00037	30	16	女性	汉族	学生	本县区	420111001		转诊	2012-01-06	2012-01-09	3			湖北省武汉市洪山区	洪山区疾病预防控制中心	湖北省武汉市洪山区	洪山区疾病预防控制中心			2012-01-13 10	继发	病原学阴性		李杰	2012-01-13	新患者	初治		2012-01-13							治疗	湖北省武汉市洪山区	洪山区珞南街理工大社区卫生服务中心		完成疗程
		31	普通病案	湖北省武汉市汉阳区	武汉市汉阳区结核病防治所	湖北省武汉市汉阳区	武汉市汉阳区结核病防治所	420105012-2012-00011	31	17	女性	汉族	学生	本县区	420105008		追踪	2011-12-01	2011-12-14	13	阴性	2011-12-28	湖北省武汉市汉阳区	武汉市汉阳区结核病防治所	湖北省武汉市汉阳区	武汉市汉阳区结核病防治所			2012-01-16 08	继发	病原学阴性		朱建	2012-01-16	新患者	初治	2012-02-28	2012-01-16							治疗	湖北省武汉市汉阳区	汉阳区四新街社区卫生服务中心		完成疗程
		32	普通病案	湖北省武汉市洪山区	洪山区疾病预防控制中心	湖北省武汉市洪山区	洪山区疾病预防控制中心	420111016-2012-00045	32	24	男性	汉族	学生	本县区	420111002		追踪	2011-12-11	2012-01-11	31	阴性	2012-01-16	湖北省武汉市洪山区	洪山区疾病预防控制中心	湖北省武汉市洪山区	洪山区疾病预防控制中心			2012-01-16 09	继发	病原学阳性		吴杰	2012-01-16	新患者	初治		2012-01-16							治疗	湖北省武汉市洪山区	洪山区疾病预防控制中心		治愈
		33	普通病案	湖北省武汉市洪山区	洪山区疾病预防控制中心	湖北省武汉市洪山区	洪山区疾病预防控制中心	420111016-2012-00044	33	26	女性	汉族	学生	本县区	420111002		转诊	2012-01-06	2012-01-11	5	阴性	2012-01-16	湖北省武汉市洪山区	洪山区疾病预防控制中心	湖北省武汉市洪山区	洪山区疾病预防控制中心			2012-01-16 09	继发	病原学阴性		李杰	2012-01-16	新患者	初治		2012-01-16							治疗	湖北省武汉市洪山区	洪山区关山街华中科技大学医院		完成疗程
		34	普通病案	湖北省武汉市洪山区	洪山区疾病预防控制中心	湖北省武汉市洪山区	洪山区疾病预防控制中心	420111016-2012-00047	34	23	男性	汉族	学生	本县区	420111002		转诊	2011-12-26	2012-01-12	17	阴性	2012-01-16	湖北省武汉市洪山区	洪山区疾病预防控制中心	湖北省武汉市洪山区	洪山区疾病预防控制中心			2012-01-16 09	继发	病原学阴性		李仁惠	2012-01-16	新患者	初治		2012-01-16							治疗	湖北省武汉市洪山区	洪山区疾病预防控制中心		完成疗程
		35	普通病案	湖北省武汉市黄陂区	武汉市黄陂区疾病预防控制中心	湖北省武汉市黄陂区	武汉市黄陂区疾病预防控制中心	420116003-2012-00025	35	17	男性	汉族	学生	本县区	420116012		直接就诊	2012-01-06	2012-01-16	10			湖北省武汉市黄陂区	武汉市黄陂区疾病预防控制中心	湖北省武汉市黄陂区	武汉市黄陂区疾病预防控制中心			2012-01-17 14	继发	病原学阴性		黄文	2012-01-17	新患者	初治		2012-01-17							治疗	湖北省武汉市黄陂区	武汉市黄陂区姚家集街道卫生院		完成疗程
		36	普通病案	湖北省武汉市洪山区	洪山区疾病预防控制中心	湖北省武汉市洪山区	洪山区疾病预防控制中心	420111016-2012-00049	36	18	男性	汉族	学生	本县区	420111002		转诊	2012-01-01	2012-01-16	15			湖北省武汉市洪山区	洪山区疾病预防控制中心	湖北省武汉市洪山区	洪山区疾病预防控制中心			2012-01-17 08	继发	病原学阴性		李杰	2012-01-17	新患者	初治		2012-01-17							治疗	湖北省武汉市洪山区	中国地质大学医院		完成疗程
		37	普通病案	湖北省武汉市洪山区	洪山区疾病预防控制中心	湖北省武汉市洪山区	洪山区疾病预防控制中心	420111016-2012-00050	37	22	男性	汉族	学生	本县区	420192005		转诊	2011-12-23	2012-01-16	24	阴性	2012-01-20	湖北省武汉市洪山区	洪山区疾病预防控制中心	湖北省武汉市洪山区	洪山区疾病预防控制中心			2012-01-20 08	继发	病原学阴性		李仁惠	2012-01-20	新患者	初治		2012-01-20							治疗	湖北省武汉市东湖高新技术开发区	武汉东湖新技术开发区左岭街社区卫生服务中心		完成疗程
		38	普通病案	湖北省武汉市洪山区	洪山区疾病预防控制中心	湖北省武汉市洪山区	洪山区疾病预防控制中心	420111016-2012-00051	38	21	女性	汉族	学生	本县区	420111006		转诊	2012-01-10	2012-01-18	8	阴性	2012-01-20	湖北省武汉市洪山区	洪山区疾病预防控制中心	湖北省武汉市洪山区	洪山区疾病预防控制中心			2012-01-20 08	继发	病原学阴性		李杰	2012-01-20	新患者	初治		2012-01-20							治疗	湖北省武汉市洪山区	洪山区疾病预防控制中心		完成疗程
		39	普通病案	湖北省武汉市洪山区	洪山区疾病预防控制中心	湖北省武汉市洪山区	洪山区疾病预防控制中心	420111016-2012-00055	39	25	女性	汉族	学生	本县区	420111002		转诊	2012-01-11	2012-01-18	7	阴性	2012-01-20	湖北省武汉市洪山区	洪山区疾病预防控制中心	湖北省武汉市洪山区	洪山区疾病预防控制中心			2012-01-20 08	继发	病原学阳性		吴杰	2012-01-20	新患者	初治		2012-01-20							治疗	湖北省武汉市洪山区	洪山区疾病预防控制中心		治愈
		40	普通病案	湖北省武汉市新洲区	新洲区疾病预防控制中心	湖北省武汉市新洲区	新洲区疾病预防控制中心	420117002-2012-00037	40	16	男性	汉族	学生	本县区	420117006		转诊	2012-01-14	2012-01-21	7	阴性	2012-01-21	湖北省武汉市新洲区	新洲区疾病预防控制中心	湖北省武汉市新洲区	新洲区疾病预防控制中心			2012-01-21 15	继发	病原学阴性		张念中	2012-01-21	新患者	初治		2012-01-21							治疗	湖北省武汉市新洲区	新洲区三店街卫生院		完成疗程
		41	普通病案	湖北省武汉市硚口区	武汉市结核病防治所	湖北省武汉市硚口区	武汉市结核病防治所	420104019-2012-00046	41	17	男性	汉族	学生	本县区	420104003		转诊	2012-01-10	2012-01-20	10			湖北省武汉市硚口区	武汉市结核病防治所	湖北省武汉市硚口区	武汉市结核病防治所			2012-01-21 10	继发	病原学阴性		李春清	2012-01-21	新患者	初治		2012-01-21							治疗	湖北省武汉市硚口区	武汉市结核病防治所		完成疗程
		42	普通病案	湖北省武汉市洪山区	洪山区疾病预防控制中心	湖北省武汉市洪山区	洪山区疾病预防控制中心	420111016-2012-00062	42	19	女性	汉族	学生	本县区	420111001		转诊	2012-01-09	2012-01-28	19			湖北省武汉市洪山区	洪山区疾病预防控制中心	湖北省武汉市洪山区	洪山区疾病预防控制中心			2012-01-29 10	继发	病原学阴性		李仁惠	2012-01-29	新患者	初治		2012-01-29							治疗	湖北省武汉市洪山区	洪山区珞南街理工大社区卫生服务中心		完成疗程
		43	普通病案	湖北省武汉市江汉区	武汉市江汉区疾病预防控制中心	湖北省武汉市江汉区	武汉市江汉区疾病预防控制中心	420103013-2012-00014	43	20	男性	汉族	学生	本县区	420103013		转诊	2012-01-11	2012-01-16	5	阴性	2012-01-16	湖北省武汉市江汉区	武汉市江汉区疾病预防控制中心	湖北省武汉市江汉区	武汉市江汉区疾病预防控制中心			2012-01-30 09	继发	病原学阴性		连展	2012-01-30	新患者	初治		2012-01-30							治疗	湖北省武汉市江汉区	江汉区汉兴街社区卫生服务中心		完成疗程
		44	普通病案	湖北省武汉市江汉区	武汉市江汉区疾病预防控制中心	湖北省武汉市江汉区	武汉市江汉区疾病预防控制中心	420103013-2012-00018	44	20	男性	汉族	学生	本县区	420103009		转诊	2012-01-11	2012-01-18	7	阴性	2012-01-18	湖北省武汉市江汉区	武汉市江汉区疾病预防控制中心	湖北省武汉市江汉区	武汉市江汉区疾病预防控制中心			2012-01-30 10	继发	病原学阴性		王娅	2012-01-30	新患者	初治		2012-01-30							治疗				完成疗程
		45	普通病案	湖北省武汉市武昌区	武昌区疾病预防控制中心	湖北省武汉市武昌区	武昌区疾病预防控制中心	420106010-2012-00046	45	14	男性	汉族	学生	本县区	420106003		直接就诊	2012-01-26	2012-01-31	5	阴性	2012-01-31	湖北省武汉市武昌区	武昌区疾病预防控制中心	湖北省武汉市武昌区	武昌区疾病预防控制中心			2012-01-31 11	继发	病原学阴性		刘文	2012-01-31	新患者	初治		2012-01-31							治疗				完成疗程
		46	普通病案	湖北省武汉市武昌区	武昌区疾病预防控制中心	湖北省武汉市武昌区	武昌区疾病预防控制中心	420106010-2012-00036	46	24	女性	汉族	学生	本县区	420106003		直接就诊	2012-01-23	2012-01-31	8	阴性	2012-01-31	湖北省武汉市武昌区	武昌区疾病预防控制中心	湖北省武汉市武昌区	武昌区疾病预防控制中心			2012-01-31 10	继发	病原学阴性		刘文	2012-01-31	新患者	初治		2012-01-31							治疗				完成疗程
		47	普通病案	湖北省武汉市蔡甸区	武汉市蔡甸区疾病预防控制中心	湖北省武汉市蔡甸区	武汉市蔡甸区疾病预防控制中心	420114003-2012-00027	47	17	男性	汉族	学生	本县区	420114004		直接就诊	2012-01-12	2012-02-01	20			湖北省武汉市蔡甸区	武汉市蔡甸区疾病预防控制中心	湖北省武汉市蔡甸区	武汉市蔡甸区疾病预防控制中心			2012-02-01 10	继发	病原学阳性		刘晓燕	2012-02-01	新患者	初治		2012-02-01							治疗	湖北省武汉市蔡甸区	武汉市蔡甸区侏儒街卫生院		治愈
		48	普通病案	湖北省武汉市东西湖区	东西湖区结核病防治所	湖北省武汉市东西湖区	东西湖区结核病防治所	420112019-2012-00012	48	22	男性	汉族	学生	本县区	420112400		追踪	2011-10-01	2011-10-27	26	阴性	2011-12-20	湖北省武汉市东西湖区	东西湖区结核病防治所	湖北省武汉市东西湖区	东西湖区结核病防治所			2012-02-02 17	继发	病原学阴性		孟刚	2012-02-02	新患者	初治		2012-02-02							治疗	湖北省武汉市东西湖区	常青花园社区卫生服务中心		完成疗程
		49	普通病案	湖北省武汉市洪山区	洪山区疾病预防控制中心	湖北省武汉市洪山区	洪山区疾病预防控制中心	420111016-2012-00075	49	18	男性	汉族	学生	本市其它县区	420111002		转诊	2012-02-02	2012-02-06	4	阴性	2012-02-06	湖北省武汉市洪山区	洪山区疾病预防控制中心	湖北省武汉市洪山区	洪山区疾病预防控制中心			2012-02-06 10	继发	病原学阳性		李杰	2012-02-06	新患者	初治		2012-02-06							治疗	湖北省武汉市洪山区	中国地质大学医院		其他
		50	普通病案	湖北省武汉市洪山区	洪山区疾病预防控制中心	湖北省武汉市洪山区	洪山区疾病预防控制中心	420111016-2012-00073	50	20	女性	汉族	学生	本县区	420111002		转诊	2012-02-01	2012-02-06	5	阴性	2012-02-06	湖北省武汉市洪山区	洪山区疾病预防控制中心	湖北省武汉市洪山区	洪山区疾病预防控制中心			2012-02-06 10	继发	病原学阴性		李杰	2012-02-06	新患者	初治		2012-02-06							治疗	湖北省武汉市洪山区	中国地质大学医院		完成疗程
		51	普通病案	湖北省武汉市武昌区	武昌区疾病预防控制中心	湖北省武汉市武昌区	武昌区疾病预防控制中心	420106010-2012-00052	51	17	男性	汉族	学生	本县区	420106012		转诊	2012-01-19	2012-02-01	13	阴性	2012-02-07	湖北省武汉市武昌区	武昌区疾病预防控制中心	湖北省武汉市武昌区	武昌区疾病预防控制中心			2012-02-07 08	继发	病原学阳性		刘文	2012-02-07	新患者	初治		2012-02-07							治疗				治愈
		52	普通病案	湖北省武汉市武昌区	武昌区疾病预防控制中心	湖北省武汉市武昌区	武昌区疾病预防控制中心	420106010-2012-00054	52	17	男性	汉族	学生	本县区	420106005		转诊	2012-01-15	2012-01-29	14	阴性	2012-02-07	湖北省武汉市武昌区	武昌区疾病预防控制中心	湖北省武汉市武昌区	武昌区疾病预防控制中心			2012-02-07 10	继发	病原学阳性		刘文	2012-02-07	新患者	初治		2012-02-07							治疗				治愈
		53	普通病案	湖北省武汉市硚口区	武汉市结核病防治所	湖北省武汉市硚口区	武汉市结核病防治所	420104019-2012-00062	53	18	男性	汉族	学生	本县区	420104005		转诊	2012-02-01	2012-02-08	7			湖北省武汉市硚口区	武汉市结核病防治所	湖北省武汉市硚口区	武汉市结核病防治所			2012-02-09 19	继发	病原学阴性		李春清	2012-02-10	新患者	初治		2012-02-10							治疗	湖北省武汉市硚口区	武汉市结核病防治所		完成疗程
		54	普通病案	湖北省武汉市洪山区	洪山区疾病预防控制中心	湖北省武汉市洪山区	洪山区疾病预防控制中心	420111016-2012-00077	54	23	男性	汉族	学生	本县区	420111008		转诊	2011-12-20	2012-02-06	48	阴性	2012-02-10	湖北省武汉市洪山区	洪山区疾病预防控制中心	湖北省武汉市洪山区	洪山区疾病预防控制中心			2012-02-10 09	继发	病原学阴性		李杰	2012-02-10	新患者	初治		2012-02-10							治疗	湖北省武汉市洪山区	洪山区和平街社区卫生服务中心		完成疗程
		55	普通病案	湖北省武汉市蔡甸区	武汉市蔡甸区疾病预防控制中心	湖北省武汉市蔡甸区	武汉市蔡甸区疾病预防控制中心	420114003-2012-00032	55	12	女性	汉族	学生	本市其它县区	420114002		转诊	2012-01-13	2012-02-13	31			湖北省武汉市蔡甸区	武汉市蔡甸区疾病预防控制中心	湖北省武汉市蔡甸区	武汉市蔡甸区疾病预防控制中心			2012-02-13 15	继发	病原学阴性		刘晓燕	2012-02-13	新患者	初治		2012-02-13							治疗	湖北省武汉市蔡甸区	武汉市蔡甸区奓山街卫生院		完成疗程
		56	普通病案	湖北省武汉市洪山区	洪山区疾病预防控制中心	湖北省武汉市洪山区	洪山区疾病预防控制中心	420111016-2012-00083	56	24	男性	汉族	学生	本县区	420111006		转诊	2012-02-09	2012-02-11	2	阴性	2012-02-13	湖北省武汉市洪山区	洪山区疾病预防控制中心	湖北省武汉市洪山区	洪山区疾病预防控制中心			2012-02-13 08	继发	病原学阴性		李仁惠	2012-02-13	新患者	初治		2012-02-13							治疗	湖北省武汉市洪山区	洪山区疾病预防控制中心		完成疗程
		57	普通病案	湖北省武汉市洪山区	洪山区疾病预防控制中心	湖北省武汉市洪山区	洪山区疾病预防控制中心	420111016-2012-00088	57	25	男性	汉族	学生	本县区	420111001		转诊	2012-02-10	2012-02-13	3	阴性	2012-02-14	湖北省武汉市洪山区	洪山区疾病预防控制中心	湖北省武汉市洪山区	洪山区疾病预防控制中心			2012-02-14 08	继发	病原学阴性		李仁惠	2012-02-14	新患者	初治		2012-02-14							治疗	湖北省武汉市洪山区	洪山区疾病预防控制中心		完成疗程
		58	普通病案	湖北省武汉市蔡甸区	武汉市蔡甸区疾病预防控制中心	湖北省武汉市蔡甸区	武汉市蔡甸区疾病预防控制中心	420114003-2012-00039	58	21	男性	汉族	学生	本市其它县区	420114004		转诊	2012-01-18	2012-02-15	28			湖北省武汉市蔡甸区	武汉市蔡甸区疾病预防控制中心	湖北省武汉市蔡甸区	武汉市蔡甸区疾病预防控制中心			2012-02-15 16	继发	病原学阴性		刘晓燕	2012-02-15	新患者	初治		2012-02-15							治疗	湖北省武汉市蔡甸区	武汉市蔡甸区侏儒街卫生院		完成疗程
		59	普通病案	湖北省武汉市蔡甸区	武汉市蔡甸区疾病预防控制中心	湖北省武汉市蔡甸区	武汉市蔡甸区疾病预防控制中心	420114003-2012-00036	59	20	男性	汉族	学生	本县区	420114001		直接就诊	2012-02-10	2012-02-15	5			湖北省武汉市蔡甸区	武汉市蔡甸区疾病预防控制中心	湖北省武汉市蔡甸区	武汉市蔡甸区疾病预防控制中心			2012-02-15 16	继发	病原学阴性		刘晓燕	2012-02-15	新患者	初治		2012-02-15							治疗	湖北省武汉市蔡甸区	武汉市蔡甸区蔡甸街卫生院		完成疗程
		60	普通病案	湖北省武汉市洪山区	洪山区疾病预防控制中心	湖北省武汉市洪山区	洪山区疾病预防控制中心	420111016-2012-00092	60	26	男性	汉族	学生	本县区	420111002		转诊	2012-01-22	2012-02-12	21	阴性	2012-02-15	湖北省武汉市洪山区	洪山区疾病预防控制中心	湖北省武汉市洪山区	洪山区疾病预防控制中心			2012-02-15 09	继发	病原学阴性		李仁惠	2012-02-15	新患者	初治		2012-02-15							治疗	湖北省武汉市洪山区	武汉市第三医院光谷院区		完成疗程
		61	普通病案	湖北省武汉市硚口区	武汉市结核病防治所	湖北省武汉市硚口区	武汉市结核病防治所	420104019-2012-00065	61	19	男性	汉族	学生	本县区	420104005		转诊	2012-01-30	2012-02-15	16			湖北省武汉市硚口区	武汉市结核病防治所	湖北省武汉市硚口区	武汉市结核病防治所			2012-02-16 10	继发	病原学阴性		李春清	2012-02-16	新患者	初治		2012-02-16							治疗	湖北省武汉市硚口区	武汉市结核病防治所		完成疗程
		62	普通病案	湖北省武汉市黄陂区	武汉市黄陂区疾病预防控制中心	湖北省武汉市黄陂区	武汉市黄陂区疾病预防控制中心	420116003-2012-00077	62	16	男性	汉族	学生	本县区	420116012		转诊	2012-02-02	2012-02-17	15			湖北省武汉市黄陂区	武汉市黄陂区疾病预防控制中心	湖北省武汉市黄陂区	武汉市黄陂区疾病预防控制中心			2012-02-17 09	继发	病原学阴性		阮爱华	2012-02-17	新患者	初治		2012-02-17							治疗	湖北省武汉市黄陂区	武汉市黄陂区姚家集街道卫生院		完成疗程
		63	普通病案	湖北省武汉市洪山区	洪山区疾病预防控制中心	湖北省武汉市洪山区	洪山区疾病预防控制中心	420111016-2012-00096	63	21	女性	汉族	学生	本县区	420111002		转诊	2012-02-08	2012-02-15	7			湖北省武汉市洪山区	洪山区疾病预防控制中心	湖北省武汉市洪山区	洪山区疾病预防控制中心			2012-02-17 15	继发	病原学阴性		李仁惠	2012-02-17	新患者	初治		2012-02-17							治疗	湖北省武汉市洪山区	洪山区疾病预防控制中心		完成疗程
		64	普通病案	湖北省武汉市洪山区	洪山区疾病预防控制中心	湖北省武汉市洪山区	洪山区疾病预防控制中心	420111016-2012-00094	64	19	男性	汉族	学生	本县区	420111001		直接就诊	2012-02-02	2012-02-15	13			湖北省武汉市洪山区	洪山区疾病预防控制中心	湖北省武汉市洪山区	洪山区疾病预防控制中心			2012-02-17 15	继发	病原学阳性		李仁惠	2012-02-17	新患者	初治		2012-02-17							治疗	湖北省武汉市洪山区	洪山区珞南街理工大社区卫生服务中心		治愈
		65	普通病案	湖北省武汉市洪山区	洪山区疾病预防控制中心	湖北省武汉市洪山区	洪山区疾病预防控制中心	420111016-2012-00095	65	24	女性	汉族	学生	本县区	420111002		转诊	2012-02-09	2012-02-13	4			湖北省武汉市洪山区	洪山区疾病预防控制中心	湖北省武汉市洪山区	洪山区疾病预防控制中心			2012-02-17 15	继发	病原学阳性		李仁惠	2012-02-17	新患者	初治		2012-02-17							治疗	湖北省武汉市洪山区	洪山区疾病预防控制中心		治愈
		66	普通病案	湖北省武汉市新洲区	新洲区疾病预防控制中心	湖北省武汉市新洲区	新洲区疾病预防控制中心	420117002-2012-00071	66	19	女性	汉族	学生	本县区	420117002		追踪	2011-12-20	2012-02-18	60	阴性	2012-02-18	湖北省武汉市新洲区	新洲区疾病预防控制中心	湖北省武汉市新洲区	新洲区疾病预防控制中心			2012-02-18 11	继发	病原学阴性		马莉	2012-02-18	新患者	初治		2012-02-18							治疗	湖北省武汉市新洲区	新洲区阳逻街卫生院		完成疗程
		67	普通病案	湖北省武汉市洪山区	洪山区疾病预防控制中心	湖北省武汉市洪山区	洪山区疾病预防控制中心	420111016-2012-00098	67	21	男性	汉族	学生	本县区	420111001		转诊	2012-02-04	2012-02-15	11	阴性	2012-02-20	湖北省武汉市洪山区	洪山区疾病预防控制中心	湖北省武汉市洪山区	洪山区疾病预防控制中心			2012-02-20 09	继发	病原学阴性		吴杰	2012-02-20	新患者	初治		2012-02-20							治疗	湖北省武汉市洪山区	洪山区疾病预防控制中心		完成疗程
		68	普通病案	湖北省武汉市武昌区	武昌区疾病预防控制中心	湖北省武汉市武昌区	武昌区疾病预防控制中心	420106010-2012-00088	68	20	男性	汉族	学生	本县区	420106013		直接就诊	2012-02-15	2012-02-23	8	阴性	2012-02-23	湖北省武汉市武昌区	武昌区疾病预防控制中心	湖北省武汉市武昌区	武昌区疾病预防控制中心			2012-02-23 09	继发	病原学阳性		刘文	2012-02-23	新患者	初治		2012-02-23							治疗				治愈
		69	普通病案	湖北省武汉市蔡甸区	武汉市蔡甸区疾病预防控制中心	湖北省武汉市蔡甸区	武汉市蔡甸区疾病预防控制中心	420114003-2012-00044	69	17	男性	汉族	学生	本市其它县区	420114001		转诊	2012-02-03	2012-02-23	20			湖北省武汉市蔡甸区	武汉市蔡甸区疾病预防控制中心	湖北省武汉市蔡甸区	武汉市蔡甸区疾病预防控制中心			2012-02-23 14	继发	病原学阴性		刘晓燕	2012-02-23	新患者	初治		2012-02-23							治疗	湖北省武汉市蔡甸区	武汉市蔡甸区蔡甸街卫生院		完成疗程
		70	普通病案	湖北省武汉市蔡甸区	武汉市蔡甸区疾病预防控制中心	湖北省武汉市蔡甸区	武汉市蔡甸区疾病预防控制中心	420114003-2012-00041	70	22	男性	汉族	学生	本市其它县区	420114005		转诊	2012-01-29	2012-02-23	25			湖北省武汉市蔡甸区	武汉市蔡甸区疾病预防控制中心	湖北省武汉市蔡甸区	武汉市蔡甸区疾病预防控制中心			2012-02-23 14	继发	病原学阳性		刘晓燕	2012-02-23	新患者	初治		2012-02-23							治疗	湖北省武汉市蔡甸区	武汉市蔡甸区大集街卫生院		治愈
		71	普通病案	湖北省武汉市洪山区	洪山区疾病预防控制中心	湖北省武汉市洪山区	洪山区疾病预防控制中心	420111016-2012-00103	71	24	男性	汉族	学生	本县区	420111001		转诊	2012-02-08	2012-02-23	15	阴性	2012-02-23	湖北省武汉市洪山区	洪山区疾病预防控制中心	湖北省武汉市洪山区	洪山区疾病预防控制中心			2012-02-23 14	继发	病原学阴性		李仁惠	2012-02-23	新患者	初治		2012-02-23							治疗	湖北省武汉市洪山区	洪山区珞南街华中师范大学医院		完成疗程
		72	普通病案	湖北省武汉市洪山区	洪山区疾病预防控制中心	湖北省武汉市洪山区	洪山区疾病预防控制中心	420111016-2012-00102	72	22	女性	汉族	学生	本县区	420192006		转诊	2011-11-02	2012-02-20	110	阴性	2012-02-23	湖北省武汉市洪山区	洪山区疾病预防控制中心	湖北省武汉市洪山区	洪山区疾病预防控制中心			2012-02-23 14	继发	病原学阴性		吴杰	2012-02-23	新患者	初治		2012-02-23							治疗	湖北省武汉市东湖高新技术开发区	武汉东湖新技术开发区花山街社区卫生服务中心		完成疗程
		73	普通病案	湖北省武汉市江岸区	江岸区疾病预防控制中心	湖北省武汉市江岸区	江岸区疾病预防控制中心	420102000-2012-00065	73	18	男性	汉族	学生	本市其它县区	420102007		转诊	2012-01-29	2012-02-24	26	阴性	2012-01-31	湖北省武汉市江岸区	江岸区疾病预防控制中心	湖北省武汉市江岸区	江岸区疾病预防控制中心			2012-02-24 10	继发	病原学阳性		杜娟	2012-02-24	新患者	初治		2012-02-24							治疗	湖北省武汉市江岸区	江岸区西马街社区卫生服务中心		治愈
		74	普通病案	湖北省武汉市新洲区	新洲区疾病预防控制中心	湖北省武汉市新洲区	新洲区疾病预防控制中心	420117002-2012-00096	74	13	男性	汉族	学生	本县区	420117001		直接就诊	2012-02-23	2012-02-27	4	阴性	2012-02-27	湖北省武汉市新洲区	新洲区疾病预防控制中心	湖北省武汉市新洲区	新洲区疾病预防控制中心			2012-02-27 15	继发	病原学阴性		马莉	2012-02-27	新患者	初治		2012-02-27							治疗	湖北省武汉市新洲区	新洲区邾城街卫生院		完成疗程
		75	普通病案	湖北省武汉市江夏区	武汉市江夏区疾病预防控制中心	湖北省武汉市江夏区	武汉市江夏区疾病预防控制中心	420115008-2012-00048	75	22	男性	汉族	学生	本县区	420115019		转诊	2012-02-01	2012-02-26	25			湖北省武汉市江夏区	武汉市江夏区疾病预防控制中心	湖北省武汉市江夏区	武汉市江夏区疾病预防控制中心			2012-02-27 10	继发	病原学阴性		胡医生	2012-02-27	新患者	初治		2012-02-27							治疗	湖北省武汉市江夏区	武汉市江夏区舒安乡卫生院		完成疗程
		76	普通病案	湖北省武汉市洪山区	洪山区疾病预防控制中心	湖北省武汉市洪山区	洪山区疾病预防控制中心	420111016-2012-00105	76	23	女性	汉族	学生	本县区	420111001		追踪	2012-02-20	2012-02-22	2	阴性	2012-02-27	湖北省武汉市洪山区	洪山区疾病预防控制中心	湖北省武汉市洪山区	洪山区疾病预防控制中心			2012-02-27 09	继发	病原学阴性		吴杰	2012-02-27	新患者	初治		2012-02-27							治疗	湖北省武汉市洪山区	洪山区珞南街华中师范大学医院		完成疗程
		77	普通病案	湖北省武汉市洪山区	洪山区疾病预防控制中心	湖北省武汉市洪山区	洪山区疾病预防控制中心	420111016-2012-00109	77	21	男性	汉族	学生	本县区	420111002		转诊	2012-02-22	2012-02-23	1	阴性	2012-02-27	湖北省武汉市洪山区	洪山区疾病预防控制中心	湖北省武汉市洪山区	洪山区疾病预防控制中心			2012-02-27 09	继发	病原学阴性		李仁惠	2012-02-27	新患者	初治		2012-02-27							治疗	湖北省武汉市洪山区	武汉市第三医院光谷院区		完成疗程
		78	普通病案	湖北省武汉市洪山区	洪山区疾病预防控制中心	湖北省武汉市洪山区	洪山区疾病预防控制中心	420111016-2012-00111	78	22	女性	汉族	学生	本县区	420192004		转诊	2012-02-13	2012-02-24	11	阴性	2012-02-27	湖北省武汉市洪山区	洪山区疾病预防控制中心	湖北省武汉市洪山区	洪山区疾病预防控制中心			2012-02-27 10	继发	病原学阴性		李仁惠	2012-02-27	新患者	初治		2012-02-27							治疗	湖北省武汉市东湖高新技术开发区	武汉东湖新技术开发区花山街社区卫生服务中心		完成疗程
		79	普通病案	湖北省武汉市洪山区	洪山区疾病预防控制中心	湖北省武汉市洪山区	洪山区疾病预防控制中心	420111016-2012-00106	79	22	女性	汉族	学生	本县区	420111002		追踪	2012-02-02	2012-02-20	18	阴性	2012-02-27	湖北省武汉市洪山区	洪山区疾病预防控制中心	湖北省武汉市洪山区	洪山区疾病预防控制中心			2012-02-27 09	继发	病原学阳性		吴杰	2012-02-27	新患者	初治		2012-02-27							治疗	湖北省武汉市洪山区	洪山区疾病预防控制中心		其他
		80	普通病案	湖北省武汉市蔡甸区	武汉市蔡甸区疾病预防控制中心	湖北省武汉市蔡甸区	武汉市蔡甸区疾病预防控制中心	420114003-2012-00054	80	21	女性	汉族	学生	本县区	420114007		转诊	2012-01-28	2012-02-28	31			湖北省武汉市蔡甸区	武汉市蔡甸区疾病预防控制中心	湖北省武汉市蔡甸区	武汉市蔡甸区疾病预防控制中心			2012-02-28 15	继发	病原学阴性		刘晓燕	2012-02-28	新患者	初治		2012-02-28							治疗	湖北省武汉市蔡甸区	武汉市蔡甸区索河街卫生院		完成疗程
		81	普通病案	湖北省武汉市江夏区	武汉市江夏区疾病预防控制中心	湖北省武汉市江夏区	武汉市江夏区疾病预防控制中心	420115008-2012-00063	81	16	男性	汉族	学生	本县区	420115001		转诊	2012-02-04	2012-03-01	26	阴性	2012-03-02	湖北省武汉市江夏区	武汉市江夏区疾病预防控制中心	湖北省武汉市江夏区	武汉市江夏区疾病预防控制中心			2012-03-02 15	继发	病原学阴性		胡医生	2012-03-02	新患者	初治		2012-03-02							治疗	湖北省武汉市江夏区	藏龙岛经院社区卫生服务中心		完成疗程
		82	普通病案	湖北省武汉市东西湖区	东西湖区结核病防治所	湖北省武汉市东西湖区	东西湖区结核病防治所	420112019-2012-00027	82	17	男性	汉族	学生	本县区	420112004		转诊	2012-02-27	2012-03-01	3			湖北省武汉市东西湖区	东西湖区结核病防治所	湖北省武汉市东西湖区	东西湖区结核病防治所			2012-03-02 16	继发	病原学阳性		孟刚	2012-03-02	新患者	初治		2012-03-02							治疗	湖北省武汉市东西湖区	东西湖区将军路街卫生院		治愈
		83	普通病案	湖北省武汉市洪山区	洪山区疾病预防控制中心	湖北省武汉市洪山区	洪山区疾病预防控制中心	420111016-2012-00121	83	20	女性	汉族	学生	本县区	420192006		转诊	2012-02-21	2012-02-28	7	阴性	2012-03-02	湖北省武汉市洪山区	洪山区疾病预防控制中心	湖北省武汉市洪山区	洪山区疾病预防控制中心			2012-03-02 10	继发	病原学阴性		吴杰	2012-03-02	新患者	初治		2012-03-02							治疗	湖北省武汉市东湖高新技术开发区	武汉东湖新技术开发区花山街社区卫生服务中心		完成疗程
		84	普通病案	湖北省武汉市洪山区	洪山区疾病预防控制中心	湖北省武汉市洪山区	洪山区疾病预防控制中心	420111016-2012-00114	84	28	女性	汉族	学生	本县区	420111001		转诊	2012-02-07	2012-02-27	20	阴性	2012-03-02	湖北省武汉市洪山区	洪山区疾病预防控制中心	湖北省武汉市洪山区	洪山区疾病预防控制中心			2012-03-02 10	继发	病原学阴性		李仁惠	2012-03-02	新患者	初治		2012-03-02							治疗	湖北省武汉市洪山区	洪山区疾病预防控制中心		完成疗程
		85	普通病案	湖北省武汉市洪山区	洪山区疾病预防控制中心	湖北省武汉市洪山区	洪山区疾病预防控制中心	420111016-2012-00124	85	19	女性	汉族	学生	本县区	420111003		转诊	2012-02-25	2012-03-01	5	阴性	2012-03-02	湖北省武汉市洪山区	洪山区疾病预防控制中心	湖北省武汉市洪山区	洪山区疾病预防控制中心			2012-03-02 10	继发	病原学阴性		李仁惠	2012-03-02	新患者	初治		2012-03-02							治疗	湖北省武汉市洪山区	洪山区狮子山街华中农业大学医院		完成疗程
		86	普通病案	湖北省武汉市洪山区	洪山区疾病预防控制中心	湖北省武汉市洪山区	洪山区疾病预防控制中心	420111016-2012-00116	86	20	女性	汉族	学生	本县区	420111002		转诊	2012-01-01	2012-02-27	57	阴性	2012-03-02	湖北省武汉市洪山区	洪山区疾病预防控制中心	湖北省武汉市洪山区	洪山区疾病预防控制中心			2012-03-02 10	继发	病原学阴性		李仁惠	2012-03-02	新患者	初治		2012-03-02							治疗	湖北省武汉市洪山区	武汉市第三医院光谷院区		完成疗程
		87	普通病案	湖北省武汉市洪山区	洪山区疾病预防控制中心	湖北省武汉市洪山区	洪山区疾病预防控制中心	420111016-2012-00122	87	20	男性	汉族	学生	本县区	420111002		转诊	2012-02-28	2012-02-29	1	阴性	2012-03-02	湖北省武汉市洪山区	洪山区疾病预防控制中心	湖北省武汉市洪山区	洪山区疾病预防控制中心			2012-03-02 10	继发	病原学阴性		李仁惠	2012-03-02	新患者	初治		2012-03-02							治疗	湖北省武汉市洪山区	洪山区疾病预防控制中心		完成疗程
		88	普通病案	湖北省武汉市洪山区	洪山区疾病预防控制中心	湖北省武汉市洪山区	洪山区疾病预防控制中心	420111016-2012-00123	88	23	男性	汉族	学生	本县区	420111002		转诊	2012-02-07	2012-02-28	21	阴性	2012-03-02	湖北省武汉市洪山区	洪山区疾病预防控制中心	湖北省武汉市洪山区	洪山区疾病预防控制中心			2012-03-02 10	继发	病原学阴性		吴杰	2012-03-02	新患者	初治		2012-03-02							治疗	湖北省武汉市洪山区	洪山区关山街华中科技大学医院		完成疗程
		89	普通病案	湖北省武汉市洪山区	洪山区疾病预防控制中心	湖北省武汉市洪山区	洪山区疾病预防控制中心	420111016-2012-00112	89	19	女性	汉族	学生	本县区	420111006		转诊	2011-12-31	2012-02-27	58	阴性	2012-03-02	湖北省武汉市洪山区	洪山区疾病预防控制中心	湖北省武汉市洪山区	洪山区疾病预防控制中心			2012-03-02 08	继发	病原学阴性		李仁惠	2012-03-02	新患者	初治		2012-03-02							治疗	湖北省武汉市洪山区	洪山区疾病预防控制中心		完成疗程
		90	普通病案	湖北省武汉市硚口区	武汉市结核病防治所	湖北省武汉市硚口区	武汉市结核病防治所	420104019-2012-00093	90	19	男性	汉族	学生	本县区	420104011		转诊	2012-02-20	2012-03-01	10			湖北省武汉市硚口区	武汉市结核病防治所	湖北省武汉市硚口区	武汉市结核病防治所			2012-03-02 14	继发	病原学阳性		李春清	2012-03-03	新患者	初治		2012-03-03							治疗	湖北省武汉市硚口区	武汉市结核病防治所		治愈
		91	普通病案	湖北省武汉市洪山区	洪山区疾病预防控制中心	湖北省武汉市洪山区	洪山区疾病预防控制中心	420111016-2012-00126	91	25	男性	汉族	学生	本县区	420111001		转诊	2012-02-22	2012-03-02	9	阴性	2012-03-02	湖北省武汉市洪山区	洪山区疾病预防控制中心	湖北省武汉市洪山区	洪山区疾病预防控制中心			2012-03-05 09	继发	病原学阴性		吴杰	2012-03-05	新患者	初治		2012-03-05							治疗	湖北省武汉市洪山区	洪山区疾病预防控制中心		完成疗程
		92	普通病案	湖北省武汉市洪山区	洪山区疾病预防控制中心	湖北省武汉市洪山区	洪山区疾病预防控制中心	420111016-2012-00125	92	19	男性	汉族	学生	本县区	420111011		转诊	2012-03-01	2012-03-02	1	阴性	2012-03-05	湖北省武汉市洪山区	洪山区疾病预防控制中心	湖北省武汉市洪山区	洪山区疾病预防控制中心			2012-03-05 09	继发	病原学阴性		李仁惠	2012-03-05	新患者	初治		2012-03-05							治疗	湖北省武汉市洪山区	武汉市洪山区张家湾街社区卫生中心		完成疗程
		93	普通病案	湖北省武汉市武昌区	武昌区疾病预防控制中心	湖北省武汉市武昌区	武昌区疾病预防控制中心	420106010-2012-00108	93	16	女性	汉族	学生	本县区	420106015		直接就诊	2012-02-26	2012-03-06	9	阴性	2012-03-06	湖北省武汉市武昌区	武昌区疾病预防控制中心	湖北省武汉市武昌区	武昌区疾病预防控制中心			2012-03-06 15	继发	病原学阳性		刘文	2012-03-06	新患者	初治		2012-03-06							治疗				治愈
		94	普通病案	湖北省武汉市洪山区	洪山区疾病预防控制中心	湖北省武汉市洪山区	洪山区疾病预防控制中心	420111016-2012-00130	94	20	男性	汉族	学生	本县区	420107011		转诊	2012-03-03	2012-03-05	2	阴性	2012-03-09	湖北省武汉市洪山区	洪山区疾病预防控制中心	湖北省武汉市洪山区	洪山区疾病预防控制中心			2012-03-09 10	继发	病原学阴性		李仁惠	2012-03-09	新患者	初治		2012-03-09							治疗	湖北省武汉市青山区	武汉市青山区（武汉化学工业区）八吉府街社区卫生服务中心		完成疗程
		95	普通病案	湖北省武汉市洪山区	洪山区疾病预防控制中心	湖北省武汉市洪山区	洪山区疾病预防控制中心	420111016-2012-00138	95	22	男性	汉族	学生	本县区	420111003		转诊	2012-03-07	2012-03-09	2	阴性	2012-03-09	湖北省武汉市洪山区	洪山区疾病预防控制中心	湖北省武汉市洪山区	洪山区疾病预防控制中心			2012-03-09 10	继发	病原学阴性		李仁惠	2012-03-09	新患者	初治		2012-03-09							治疗	湖北省武汉市洪山区	洪山区狮子山街华中农业大学医院		完成疗程
		96	普通病案	湖北省武汉市洪山区	洪山区疾病预防控制中心	湖北省武汉市洪山区	洪山区疾病预防控制中心	420111016-2012-00134	96	24	女性	汉族	学生	本县区	420111003		转诊	2012-02-20	2012-03-06	15	阴性	2012-03-09	湖北省武汉市洪山区	洪山区疾病预防控制中心	湖北省武汉市洪山区	洪山区疾病预防控制中心			2012-03-09 10	继发	病原学阴性		李仁惠	2012-03-09	新患者	初治		2012-03-09							治疗	湖北省武汉市洪山区	湖北工业大学医院		完成疗程
		97	普通病案	湖北省武汉市青山区	青山区结核病防治所	湖北省武汉市青山区	青山区结核病防治所	420107018-2012-00056	97	20	男性	汉族	学生	本县区	420107009		转诊	2012-02-29	2012-03-08	8			湖北省武汉市青山区	青山区结核病防治所	湖北省武汉市青山区	青山区结核病防治所			2012-03-12 10	血行播散	病原学阴性		郑和平	2012-03-12	新患者	初治		2012-03-12							治疗	湖北省武汉市青山区	青山区结核病防治所		完成疗程
		98	普通病案	湖北省武汉市洪山区	洪山区疾病预防控制中心	湖北省武汉市洪山区	洪山区疾病预防控制中心	420111016-2012-00144	98	19	男性	蒙古族	学生	本县区	420111011		追踪	2012-01-18	2012-03-08	50	阴性	2012-03-12	湖北省武汉市洪山区	洪山区疾病预防控制中心	湖北省武汉市洪山区	洪山区疾病预防控制中心			2012-03-12 15	继发	病原学阴性		吴杰	2012-03-12	新患者	初治		2012-03-12							治疗	湖北省武汉市洪山区	武汉市洪山区张家湾街社区卫生中心		完成疗程
		99	普通病案	湖北省武汉市洪山区	洪山区疾病预防控制中心	湖北省武汉市洪山区	洪山区疾病预防控制中心	420111016-2012-00142	99	22	男性	汉族	学生	本县区	420111001		转诊	2012-03-02	2012-03-09	7	阴性	2012-03-12	湖北省武汉市洪山区	洪山区疾病预防控制中心	湖北省武汉市洪山区	洪山区疾病预防控制中心			2012-03-12 10	继发	病原学阴性		李仁惠	2012-03-12	新患者	初治		2012-03-12							治疗	湖北省武汉市洪山区	洪山区珞南街理工大社区卫生服务中心		完成疗程
		100	普通病案	湖北省武汉市洪山区	洪山区疾病预防控制中心	湖北省武汉市洪山区	洪山区疾病预防控制中心	420111016-2012-00143	100	20	女性	汉族	学生	本县区	420111002		转诊	2012-03-07	2012-03-10	3	阴性	2012-03-12	湖北省武汉市洪山区	洪山区疾病预防控制中心	湖北省武汉市洪山区	洪山区疾病预防控制中心			2012-03-12 10	继发	病原学阴性		李仁惠	2012-03-12	新患者	初治		2012-03-12							治疗	湖北省武汉市洪山区	中国地质大学医院		完成疗程
		101	普通病案	湖北省武汉市洪山区	洪山区疾病预防控制中心	湖北省武汉市洪山区	洪山区疾病预防控制中心	420111016-2012-00145	101	23	男性	汉族	学生	本县区	420111003		转诊	2011-11-09	2012-03-12	124	阴性	2012-03-12	湖北省武汉市洪山区	洪山区疾病预防控制中心	湖北省武汉市洪山区	洪山区疾病预防控制中心			2012-03-12 15	继发	病原学阴性		吴杰	2012-03-12	新患者	初治		2012-03-12							治疗	湖北省武汉市洪山区	湖北工业大学医院		完成疗程
		102	普通病案	湖北省武汉市洪山区	洪山区疾病预防控制中心	湖北省武汉市洪山区	洪山区疾病预防控制中心	420111016-2012-00140	102	15	女性	汉族	学生	本县区	420111007		转诊	2012-02-14	2012-02-20	6			湖北省武汉市洪山区	洪山区疾病预防控制中心	湖北省武汉市洪山区	洪山区疾病预防控制中心			2012-03-12 09	继发	病原学阴性		李仁惠	2012-03-12	新患者	初治		2012-03-12							治疗	湖北省武汉市洪山区	洪山区洪山街社区卫生服务中心		完成疗程
		103	普通病案	湖北省武汉市黄陂区	武汉市黄陂区疾病预防控制中心	湖北省武汉市黄陂区	武汉市黄陂区疾病预防控制中心	420116003-2012-00138	103	16	男性	汉族	学生	本县区	420116003		直接就诊	2012-03-10	2012-03-13	3			湖北省武汉市黄陂区	武汉市黄陂区疾病预防控制中心	湖北省武汉市黄陂区	武汉市黄陂区疾病预防控制中心			2012-03-13 15	继发	病原学阴性		吴汉先	2012-03-13	新患者	初治		2012-03-13							治疗	湖北省武汉市黄陂区	武汉市黄陂区横店街道中心卫生院		完成疗程
		104	普通病案	湖北省武汉市蔡甸区	武汉市蔡甸区疾病预防控制中心	湖北省武汉市蔡甸区	武汉市蔡甸区疾病预防控制中心	420114003-2012-00068	104	18	男性	汉族	学生	本县区	420114007		转诊	2012-02-23	2012-03-13	19			湖北省武汉市蔡甸区	武汉市蔡甸区疾病预防控制中心	湖北省武汉市蔡甸区	武汉市蔡甸区疾病预防控制中心			2012-03-13 14	继发	病原学阳性		刘晓燕	2012-03-13	新患者	初治		2012-03-13							治疗	湖北省武汉市蔡甸区	武汉市蔡甸区索河街卫生院		治愈
		105	普通病案	湖北省武汉市江夏区	武汉市江夏区疾病预防控制中心	湖北省武汉市江夏区	武汉市江夏区疾病预防控制中心	420115008-2012-00085	105	22	男性	汉族	学生	本县区	420115001		健康体检	2012-03-06	2012-03-12	6	阴性	2012-03-12	湖北省武汉市江夏区	武汉市江夏区疾病预防控制中心	湖北省武汉市江夏区	武汉市江夏区疾病预防控制中心			2012-03-13 09	继发	病原学阴性		熊医生	2012-03-13	新患者	初治		2012-03-13							治疗	湖北省武汉市江夏区	武汉市江夏区纸坊社区卫生服务中心		完成疗程
		106	普通病案	湖北省武汉市黄陂区	武汉市黄陂区疾病预防控制中心	湖北省武汉市黄陂区	武汉市黄陂区疾病预防控制中心	420116003-2012-00139	106	17	女性	汉族	学生	本县区	420116009		转诊	2012-03-01	2012-03-06	5			湖北省武汉市黄陂区	武汉市黄陂区疾病预防控制中心	湖北省武汉市黄陂区	武汉市黄陂区疾病预防控制中心			2012-03-14 14	继发	病原学阴性		杨志辉	2012-03-14	新患者	初治		2012-03-14							治疗	湖北省武汉市黄陂区	武汉市黄陂区王家河街道卫生院		完成疗程
		107	普通病案	湖北省武汉市洪山区	洪山区疾病预防控制中心	湖北省武汉市洪山区	洪山区疾病预防控制中心	420111016-2012-00152	107	21	男性	汉族	学生	本县区	420111002		转诊	2012-02-25	2012-03-15	19	阴性	2012-03-16	湖北省武汉市洪山区	洪山区疾病预防控制中心	湖北省武汉市洪山区	洪山区疾病预防控制中心			2012-03-16 10	继发	病原学阴性		李仁惠	2012-03-16	新患者	初治		2012-03-16							治疗	湖北省武汉市洪山区	洪山区疾病预防控制中心		完成疗程
		108	普通病案	湖北省武汉市洪山区	洪山区疾病预防控制中心	湖北省武汉市洪山区	洪山区疾病预防控制中心	420111016-2012-00146	108	20	女性	汉族	学生	本县区	420111002		转诊	2012-02-17	2012-03-16	28	阴性	2012-03-16	湖北省武汉市洪山区	洪山区疾病预防控制中心	湖北省武汉市洪山区	洪山区疾病预防控制中心			2012-03-16 09	继发	病原学阴性		吴杰	2012-03-16	新患者	初治		2012-03-16							治疗	湖北省武汉市洪山区	洪山区疾病预防控制中心		完成疗程
		109	普通病案	湖北省武汉市洪山区	洪山区疾病预防控制中心	湖北省武汉市洪山区	洪山区疾病预防控制中心	420111016-2012-00147	109	21	男性	汉族	学生	本县区	420111001		转诊	2012-01-09	2012-03-16	67	阴性	2012-03-16	湖北省武汉市洪山区	洪山区疾病预防控制中心	湖北省武汉市洪山区	洪山区疾病预防控制中心			2012-03-16 09	继发	病原学阴性		吴杰	2012-03-16	新患者	初治		2012-03-16							治疗	湖北省武汉市洪山区	洪山区珞南街理工大社区卫生服务中心		完成疗程
		110	普通病案	湖北省武汉市洪山区	洪山区疾病预防控制中心	湖北省武汉市洪山区	洪山区疾病预防控制中心	420111016-2012-00151	110	22	男性	汉族	学生	本县区	420111002		转诊	2012-03-10	2012-03-15	5	阴性	2012-03-16	湖北省武汉市洪山区	洪山区疾病预防控制中心	湖北省武汉市洪山区	洪山区疾病预防控制中心			2012-03-16 10	继发	病原学阴性		李仁惠	2012-03-16	新患者	初治		2012-03-16							治疗	湖北省武汉市洪山区	洪山区疾病预防控制中心		完成疗程
		111	普通病案	湖北省武汉市蔡甸区	武汉市蔡甸区疾病预防控制中心	湖北省武汉市蔡甸区	武汉市蔡甸区疾病预防控制中心	420114003-2012-00071	111	19	男性	汉族	学生	本县区	420114004		直接就诊	2012-03-08	2012-03-19	11			湖北省武汉市蔡甸区	武汉市蔡甸区疾病预防控制中心	湖北省武汉市蔡甸区	武汉市蔡甸区疾病预防控制中心			2012-03-19 15	继发	病原学阴性		刘晓燕	2012-03-19	新患者	初治		2012-03-19							治疗	湖北省武汉市蔡甸区	武汉市蔡甸区侏儒街卫生院		完成疗程
		112	普通病案	湖北省武汉市青山区	青山区结核病防治所	湖北省武汉市青山区	青山区结核病防治所	420107018-2012-00065	112	21	男性	汉族	学生	本市其它县区	420107001		转诊	2012-01-07	2012-02-13	37	阴性	2012-03-19	湖北省武汉市青山区	青山区结核病防治所	湖北省武汉市青山区	青山区结核病防治所			2012-03-19 14	继发	病原学阳性		郑和平	2012-03-19	新患者	初治		2012-03-19							治疗	湖北省武汉市青山区	青山区结核病防治所		治愈
		113	普通病案	湖北省武汉市江夏区	武汉市江夏区疾病预防控制中心	湖北省武汉市江夏区	武汉市江夏区疾病预防控制中心	420115008-2012-00105	113	17	男性	汉族	学生	本县区	420115001		转诊	2012-03-01	2012-03-18	17			湖北省武汉市江夏区	武汉市江夏区疾病预防控制中心	湖北省武汉市江夏区	武汉市江夏区疾病预防控制中心			2012-03-19 15	继发	病原学阴性		熊医生	2012-03-19	新患者	初治		2012-03-19							治疗	湖北省武汉市江夏区	武汉市江夏区纸坊社区卫生服务中心		完成疗程
		114	普通病案	湖北省武汉市洪山区	洪山区疾病预防控制中心	湖北省武汉市洪山区	洪山区疾病预防控制中心	420111016-2012-00158	114	22	男性	汉族	学生	本县区	420111002		转诊	2012-03-14	2012-03-17	3	阴性	2012-03-19	湖北省武汉市洪山区	洪山区疾病预防控制中心	湖北省武汉市洪山区	洪山区疾病预防控制中心			2012-03-19 10	继发	病原学阴性		李仁惠	2012-03-19	新患者	初治		2012-03-19							治疗	湖北省武汉市洪山区	洪山区疾病预防控制中心		完成疗程
		115	普通病案	湖北省武汉市洪山区	洪山区疾病预防控制中心	湖北省武汉市洪山区	洪山区疾病预防控制中心	420111016-2012-00157	115	24	女性	汉族	学生	本县区	420111001		转诊	2012-02-06	2012-03-16	39	阴性	2012-03-19	湖北省武汉市洪山区	洪山区疾病预防控制中心	湖北省武汉市洪山区	洪山区疾病预防控制中心			2012-03-19 10	继发	病原学阴性		李仁惠	2012-03-19	新患者	初治		2012-03-19							治疗	湖北省武汉市洪山区	洪山区珞南街华中师范大学医院		完成疗程
		116	普通病案	湖北省武汉市洪山区	洪山区疾病预防控制中心	湖北省武汉市洪山区	洪山区疾病预防控制中心	420111016-2012-00159	116	23	男性	汉族	学生	本县区	420111001		转诊	2012-02-28	2012-03-18	19	阴性	2012-03-19	湖北省武汉市洪山区	洪山区疾病预防控制中心	湖北省武汉市洪山区	洪山区疾病预防控制中心			2012-03-19 10	继发	病原学阳性		吴杰	2012-03-19	新患者	初治		2012-03-19							治疗	湖北省武汉市洪山区	洪山区疾病预防控制中心		治愈
		117	普通病案	湖北省武汉市洪山区	洪山区疾病预防控制中心	湖北省武汉市洪山区	洪山区疾病预防控制中心	420111016-2012-00163	117	22	男性	汉族	学生	本县区	420111002		转诊	2012-02-11	2012-03-19	37	阴性	2012-03-21	湖北省武汉市洪山区	洪山区疾病预防控制中心	湖北省武汉市洪山区	洪山区疾病预防控制中心			2012-03-21 10	继发	病原学阳性		吴杰	2012-03-21	新患者	初治		2012-03-21							治疗	湖北省武汉市洪山区	洪山区疾病预防控制中心		治愈
		118	普通病案	湖北省武汉市洪山区	洪山区疾病预防控制中心	湖北省武汉市洪山区	洪山区疾病预防控制中心	420111016-2012-00164	118	23	男性	汉族	学生	本县区	420111002		转诊	2012-03-05	2012-03-19	14	阴性	2012-03-21	湖北省武汉市洪山区	洪山区疾病预防控制中心	湖北省武汉市洪山区	洪山区疾病预防控制中心			2012-03-21 10	继发	病原学阴性		李仁惠	2012-03-21	新患者	初治		2012-03-21							治疗	湖北省武汉市洪山区	中国地质大学医院		完成疗程
		119	普通病案	湖北省武汉市洪山区	洪山区疾病预防控制中心	湖北省武汉市洪山区	洪山区疾病预防控制中心	420111016-2012-00161	119	19	男性	汉族	学生	本县区	420111002		转诊	2012-03-05	2012-03-19	14	阴性	2012-03-21	湖北省武汉市洪山区	洪山区疾病预防控制中心	湖北省武汉市洪山区	洪山区疾病预防控制中心			2012-03-21 09	继发	病原学阳性		李仁惠	2012-03-21	新患者	初治		2012-03-21							治疗	湖北省武汉市洪山区	洪山区疾病预防控制中心		治愈
		120	普通病案	湖北省武汉市洪山区	洪山区疾病预防控制中心	湖北省武汉市洪山区	洪山区疾病预防控制中心	420111016-2012-00162	120	19	女性	汉族	学生	本县区	420111002		转诊	2012-03-16	2012-03-21	5	阴性	2012-03-21	湖北省武汉市洪山区	洪山区疾病预防控制中心	湖北省武汉市洪山区	洪山区疾病预防控制中心			2012-03-21 10	继发	病原学阴性		李仁惠	2012-03-21	新患者	初治		2012-03-21							治疗	湖北省武汉市洪山区	洪山区疾病预防控制中心		完成疗程
		121	普通病案	湖北省武汉市武昌区	武昌区疾病预防控制中心	湖北省武汉市武昌区	武昌区疾病预防控制中心	420106010-2012-00142	121	15	女性	汉族	学生	本县区	420106002		直接就诊	2012-03-16	2012-03-23	7	阴性	2012-03-23	湖北省武汉市武昌区	武昌区疾病预防控制中心	湖北省武汉市武昌区	武昌区疾病预防控制中心			2012-03-23 09	继发	病原学阴性		刘文	2012-03-23	新患者	初治		2012-03-23							治疗				完成疗程
		122	普通病案	湖北省武汉市黄陂区	武汉市黄陂区疾病预防控制中心	湖北省武汉市黄陂区	武汉市黄陂区疾病预防控制中心	420116003-2012-00176	122	17	男性	汉族	学生	本市其它县区	420116010		追踪	2012-02-15	2012-03-23	37			湖北省武汉市黄陂区	武汉市黄陂区疾病预防控制中心	湖北省武汉市黄陂区	武汉市黄陂区疾病预防控制中心			2012-03-23 10	继发	病原学阴性		阮爱华	2012-03-23	新患者	初治		2012-03-23							治疗	湖北省武汉市黄陂区	武汉市黄陂区长轩岭街道中心卫生院		完成疗程
		123	普通病案	湖北省武汉市江夏区	武汉市江夏区疾病预防控制中心	湖北省武汉市江夏区	武汉市江夏区疾病预防控制中心	420115008-2012-00124	123	17	男性	汉族	学生	本县区	420115001		转诊	2012-03-20	2012-03-25	5			湖北省武汉市江夏区	武汉市江夏区疾病预防控制中心	湖北省武汉市江夏区	武汉市江夏区疾病预防控制中心			2012-03-26 16	继发	病原学阴性		熊医生	2012-03-26	新患者	初治		2012-03-26							治疗	湖北省武汉市江夏区	武汉市江夏区纸坊社区卫生服务中心		完成疗程
		124	普通病案	湖北省武汉市洪山区	洪山区疾病预防控制中心	湖北省武汉市洪山区	洪山区疾病预防控制中心	420111016-2012-00169	124	27	女性	汉族	学生	本县区	420111001		转诊	2012-03-15	2012-03-21	6	阴性	2012-03-26	湖北省武汉市洪山区	洪山区疾病预防控制中心	湖北省武汉市洪山区	洪山区疾病预防控制中心			2012-03-26 09	继发	病原学阴性		吴杰	2012-03-26	新患者	初治		2012-03-26							治疗	湖北省武汉市洪山区	洪山区珞南街华中师范大学医院		完成疗程
		125	普通病案	湖北省武汉市洪山区	洪山区疾病预防控制中心	湖北省武汉市洪山区	洪山区疾病预防控制中心	420111016-2012-00171	125	24	女性	汉族	学生	本县区	420111007		转诊	2012-03-19	2012-03-21	2	阴性	2012-03-26	湖北省武汉市洪山区	洪山区疾病预防控制中心	湖北省武汉市洪山区	洪山区疾病预防控制中心			2012-03-26 10	继发	病原学阳性		吴杰	2012-03-26	新患者	初治		2012-03-26							治疗	湖北省武汉市洪山区	洪山区洪山街社区卫生服务中心		治愈
		126	普通病案	湖北省武汉市洪山区	洪山区疾病预防控制中心	湖北省武汉市洪山区	洪山区疾病预防控制中心	420111016-2012-00176	126	23	男性	汉族	学生	本县区	420111003		转诊	2012-03-02	2012-03-24	22	阴性	2012-03-26	湖北省武汉市洪山区	洪山区疾病预防控制中心	湖北省武汉市洪山区	洪山区疾病预防控制中心			2012-03-26 15	继发	病原学阴性		李仁惠	2012-03-26	新患者	初治		2012-03-26							治疗	湖北省武汉市洪山区	湖北工业大学医院		完成疗程
		127	普通病案	湖北省武汉市青山区	青山区结核病防治所	湖北省武汉市青山区	青山区结核病防治所	420107018-2012-00077	127	18	男性	汉族	学生	本市其它县区	420107999		转诊	2012-03-09	2012-03-12	3			湖北省武汉市青山区	青山区结核病防治所	湖北省武汉市青山区	青山区结核病防治所			2012-03-27 15	继发	病原学阴性		郑和平	2012-03-27	新患者	初治		2012-03-27							治疗	湖北省武汉市青山区	青山区结核病防治所		完成疗程
		128	普通病案	湖北省武汉市东西湖区	东西湖区结核病防治所	湖北省武汉市东西湖区	东西湖区结核病防治所	420112019-2012-00042	128	18	男性	汉族	学生	本县区	420112001		直接就诊	2012-03-23	2012-03-27	4			湖北省武汉市东西湖区	东西湖区结核病防治所	湖北省武汉市东西湖区	东西湖区结核病防治所			2012-03-27 14	继发	病原学阴性		孟刚	2012-03-27	新患者	初治		2012-03-27							治疗	湖北省武汉市东西湖区	东西湖区吴家山街社区卫生服务中心		完成疗程
		129	普通病案	湖北省武汉市硚口区	武汉市结核病防治所	湖北省武汉市硚口区	武汉市结核病防治所	420104019-2012-00124	129	14	男性	汉族	学生	本县区	420104009		转诊	2012-03-17	2012-03-25	8	阴性	2012-03-26	湖北省武汉市硚口区	武汉市结核病防治所	湖北省武汉市硚口区	武汉市结核病防治所			2012-03-26 17	继发	病原学阳性		张秀华	2012-03-27	新患者	初治		2012-03-27							治疗	湖北省武汉市硚口区	武汉市结核病防治所		治愈
		130	普通病案	湖北省武汉市洪山区	洪山区疾病预防控制中心	湖北省武汉市洪山区	洪山区疾病预防控制中心	420111016-2012-00184	130	20	男性	汉族	学生	本县区	420111002		转诊	2012-03-05	2012-03-27	22	阴性	2012-03-27	湖北省武汉市洪山区	洪山区疾病预防控制中心	湖北省武汉市洪山区	洪山区疾病预防控制中心			2012-03-27 08	继发	病原学阴性		李仁惠	2012-03-27	新患者	初治		2012-03-27							治疗	湖北省武汉市洪山区	中国地质大学医院		完成疗程
		131	普通病案	湖北省武汉市洪山区	洪山区疾病预防控制中心	湖北省武汉市洪山区	洪山区疾病预防控制中心	420111016-2012-00186	131	21	男性	汉族	学生	本县区	420111002		转诊	2012-03-11	2012-03-27	16	阴性	2012-03-27	湖北省武汉市洪山区	洪山区疾病预防控制中心	湖北省武汉市洪山区	洪山区疾病预防控制中心			2012-03-27 08	继发	病原学阴性		吴杰	2012-03-27	新患者	初治		2012-03-27							治疗	湖北省武汉市洪山区	洪山区疾病预防控制中心		完成疗程
		132	普通病案	湖北省武汉市蔡甸区	武汉市蔡甸区疾病预防控制中心	湖北省武汉市蔡甸区	武汉市蔡甸区疾病预防控制中心	420114003-2012-00073	132	18	男性	汉族	学生	本市其它县区	420114001		转诊	2012-03-18	2012-03-28	10			湖北省武汉市蔡甸区	武汉市蔡甸区疾病预防控制中心	湖北省武汉市蔡甸区	武汉市蔡甸区疾病预防控制中心			2012-03-28 14	继发	病原学阳性		刘晓燕	2012-03-28	新患者	初治		2012-03-28							治疗	湖北省武汉市蔡甸区	武汉市蔡甸区蔡甸街卫生院		治愈
		133	普通病案	湖北省武汉市蔡甸区	武汉市蔡甸区疾病预防控制中心	湖北省武汉市蔡甸区	武汉市蔡甸区疾病预防控制中心	420114003-2012-00082	133	17	女性	汉族	学生	本县区	420114002		直接就诊	2012-03-08	2012-03-28	20			湖北省武汉市蔡甸区	武汉市蔡甸区疾病预防控制中心	湖北省武汉市蔡甸区	武汉市蔡甸区疾病预防控制中心			2012-03-28 14	继发	病原学阴性		刘晓燕	2012-03-28	新患者	初治		2012-03-28							治疗	湖北省武汉市蔡甸区	武汉市蔡甸区奓山街卫生院		完成疗程
		134	普通病案	湖北省武汉市江夏区	武汉市江夏区疾病预防控制中心	湖北省武汉市江夏区	武汉市江夏区疾病预防控制中心	420115008-2012-00127	134	19	男性	汉族	学生	本县区	420115001		转诊	2012-03-01	2012-03-27	26			湖北省武汉市江夏区	武汉市江夏区疾病预防控制中心	湖北省武汉市江夏区	武汉市江夏区疾病预防控制中心			2012-03-28 17	继发	病原学阴性		胡医生	2012-03-28	新患者	初治		2012-03-28							治疗	湖北省武汉市江夏区	武汉市江夏区湖泗镇卫生院		完成疗程
		135	普通病案	湖北省武汉市青山区	青山区结核病防治所	湖北省武汉市青山区	青山区结核病防治所	420107018-2012-50008	135	19	男性	汉族	学生	本县区	420107009		直接就诊	2012-03-13	2012-03-13	0			湖北省武汉市青山区	青山区结核病防治所	湖北省武汉市青山区	青山区结核病防治所			2012-03-28 14	继发	病原学阴性		朱谦	2012-03-28	新患者	初治		2012-03-28							治疗	湖北省武汉市青山区	青山区结核病防治所		完成疗程
		136	普通病案	湖北省武汉市江夏区	武汉市江夏区疾病预防控制中心	湖北省武汉市江夏区	武汉市江夏区疾病预防控制中心	420115008-2012-00123	136	18	女性	汉族	学生	本县区	420115010		直接就诊	2012-03-20	2012-03-27	7			湖北省武汉市江夏区	武汉市江夏区疾病预防控制中心	湖北省武汉市江夏区	武汉市江夏区疾病预防控制中心			2012-03-28 10	继发	病原学阴性		艾医生	2012-03-28	新患者	初治		2012-03-28							治疗	湖北省武汉市江夏区	武汉市江夏区五里界社区卫生服务中心		完成疗程
		137	普通病案	湖北省武汉市洪山区	洪山区疾病预防控制中心	湖北省武汉市洪山区	洪山区疾病预防控制中心	420111016-2012-00188	137	21	男性	汉族	学生	本县区	420111003		转诊	2012-02-27	2012-03-27	29	阴性	2012-03-28	湖北省武汉市洪山区	洪山区疾病预防控制中心	湖北省武汉市洪山区	洪山区疾病预防控制中心			2012-03-28 10	继发	病原学阴性		吴杰	2012-03-28	新患者	初治		2012-03-28							治疗	湖北省武汉市洪山区	湖北工业大学医院		完成疗程
		138	普通病案	湖北省武汉市江夏区	武汉市江夏区疾病预防控制中心	湖北省武汉市江夏区	武汉市江夏区疾病预防控制中心	420115008-2012-00138	138	17	男性	汉族	学生	本县区	420115001		直接就诊	2012-03-21	2012-03-29	8			湖北省武汉市江夏区	武汉市江夏区疾病预防控制中心	湖北省武汉市江夏区	武汉市江夏区疾病预防控制中心			2012-03-30 10	继发	病原学阴性		艾医生	2012-03-30	新患者	初治		2012-03-30							治疗	湖北省武汉市江夏区	武汉市江夏区纸坊社区卫生服务中心		完成疗程
		139	普通病案	湖北省武汉市硚口区	武汉市结核病防治所	湖北省武汉市硚口区	武汉市结核病防治所	420104019-2012-00135	139	18	男性	汉族	学生	本县区	420104004		转诊	2012-03-26	2012-03-31	5	阴性	2012-04-01	湖北省武汉市硚口区	武汉市结核病防治所	湖北省武汉市硚口区	武汉市结核病防治所			2012-04-01 10	继发	病原学阴性		李春清	2012-04-01	新患者	初治		2012-04-01							治疗	湖北省武汉市硚口区	武汉市结核病防治所		完成疗程
		140	普通病案	湖北省武汉市硚口区	武汉市结核病防治所	湖北省武汉市硚口区	武汉市结核病防治所	420104019-2012-00132	140	17	女性	汉族	学生	本县区	420104004		转诊	2012-03-24	2012-03-31	7	阴性	2012-04-01	湖北省武汉市硚口区	武汉市结核病防治所	湖北省武汉市硚口区	武汉市结核病防治所			2012-04-01 10	继发	病原学阳性		李春清	2012-04-01	新患者	初治		2012-04-01							治疗	湖北省武汉市硚口区	武汉市结核病防治所		治愈
		141	普通病案	湖北省武汉市武昌区	武昌区疾病预防控制中心	湖北省武汉市武昌区	武昌区疾病预防控制中心	420106010-2012-00163	141	15	女性	汉族	学生	本县区	420106002		直接就诊	2012-03-27	2012-04-05	9	阴性	2012-04-05	湖北省武汉市武昌区	武昌区疾病预防控制中心	湖北省武汉市武昌区	武昌区疾病预防控制中心			2012-04-05 15	继发	病原学阳性		刘文	2012-04-05	新患者	初治		2012-04-05							治疗				治愈
		142	普通病案	湖北省武汉市武昌区	武昌区疾病预防控制中心	湖北省武汉市武昌区	武昌区疾病预防控制中心	420106010-2012-00162	142	23	男性	汉族	学生	本县区	420106013		转诊	2012-03-23	2012-03-23	0	阴性	2012-04-05	湖北省武汉市武昌区	武昌区疾病预防控制中心	湖北省武汉市武昌区	武昌区疾病预防控制中心			2012-04-05 16	继发	病原学阴性		刘文	2012-04-05	新患者	初治		2012-04-05							治疗				完成疗程
		143	普通病案	湖北省武汉市武昌区	武昌区疾病预防控制中心	湖北省武汉市武昌区	武昌区疾病预防控制中心	420106010-2012-00159	143	16	女性	汉族	学生	本市其它县区	420106011		转诊	2012-03-14	2012-03-22	8	阴性	2012-04-05	湖北省武汉市武昌区	武昌区疾病预防控制中心	湖北省武汉市武昌区	武昌区疾病预防控制中心			2012-04-05 14	继发	病原学阴性		刘文	2012-04-05	新患者	初治		2012-04-05							治疗				完成疗程
		144	普通病案	湖北省武汉市硚口区	武汉市结核病防治所	湖北省武汉市硚口区	武汉市结核病防治所	420104019-2012-00143	144	18	男性	汉族	学生	本县区	420104002		转诊	2012-03-21	2012-04-03	13	阴性	2012-04-04	湖北省武汉市硚口区	武汉市结核病防治所	湖北省武汉市硚口区	武汉市结核病防治所			2012-04-04 17	继发	病原学阳性		李春清	2012-04-05	新患者	初治		2012-04-05							治疗	湖北省武汉市硚口区	武汉市结核病防治所		治愈
		145	普通病案	湖北省武汉市硚口区	武汉市结核病防治所	湖北省武汉市硚口区	武汉市结核病防治所	420104019-2012-00137	145	18	男性	汉族	学生	本县区	420104002		转诊	2012-03-22	2012-04-03	12	阴性	2012-04-04	湖北省武汉市硚口区	武汉市结核病防治所	湖北省武汉市硚口区	武汉市结核病防治所			2012-04-04 17	继发	病原学阴性		李春清	2012-04-05	新患者	初治		2012-04-05							治疗	湖北省武汉市硚口区	武汉市结核病防治所		完成疗程
		146	普通病案	湖北省武汉市硚口区	武汉市结核病防治所	湖北省武汉市硚口区	武汉市结核病防治所	420104019-2012-00144	146	18	男性	汉族	学生	本县区	420104003		转诊	2012-03-07	2012-04-03	27	阴性	2012-04-04	湖北省武汉市硚口区	武汉市结核病防治所	湖北省武汉市硚口区	武汉市结核病防治所			2012-04-04 17	继发	病原学阴性		李春清	2012-04-05	新患者	初治		2012-04-05							治疗	湖北省武汉市硚口区	武汉市结核病防治所		完成疗程
		147	普通病案	湖北省武汉市洪山区	洪山区疾病预防控制中心	湖北省武汉市洪山区	洪山区疾病预防控制中心	420111016-2012-00198	147	22	女性	汉族	学生	本县区	420111002		转诊	2012-03-27	2012-03-30	3	阴性	2012-04-06	湖北省武汉市洪山区	洪山区疾病预防控制中心	湖北省武汉市洪山区	洪山区疾病预防控制中心			2012-04-06 15	继发	病原学阴性		李仁惠	2012-04-06	新患者	初治		2012-04-06							治疗	湖北省武汉市洪山区	洪山区疾病预防控制中心		完成疗程
		148	普通病案	湖北省武汉市洪山区	洪山区疾病预防控制中心	湖北省武汉市洪山区	洪山区疾病预防控制中心	420111016-2012-00193	148	18	女性	汉族	学生	本县区	420111004		转诊	2012-03-22	2012-03-28	6	阴性	2012-04-06	湖北省武汉市洪山区	洪山区疾病预防控制中心	湖北省武汉市洪山区	洪山区疾病预防控制中心			2012-04-06 15	继发	病原学阴性		李仁惠	2012-04-06	新患者	初治		2012-04-06							治疗	湖北省武汉市洪山区	武汉市洪山区张家湾街社区卫生中心		完成疗程
		149	普通病案	湖北省武汉市洪山区	洪山区疾病预防控制中心	湖北省武汉市洪山区	洪山区疾病预防控制中心	420111016-2012-00205	149	21	男性	汉族	学生	本县区	420111003		转诊	2012-03-15	2012-04-05	21	阴性	2012-04-06	湖北省武汉市洪山区	洪山区疾病预防控制中心	湖北省武汉市洪山区	洪山区疾病预防控制中心			2012-04-06 09	继发	病原学阴性		李仁惠	2012-04-06	新患者	初治		2012-04-06							治疗	湖北省武汉市洪山区	洪山区狮子山街华中农业大学医院		完成疗程
		150	普通病案	湖北省武汉市洪山区	洪山区疾病预防控制中心	湖北省武汉市洪山区	洪山区疾病预防控制中心	420111016-2012-00195	150	16	男性	汉族	学生	本县区	420192005		转诊	2012-03-24	2012-03-29	5	阴性	2012-04-06	湖北省武汉市洪山区	洪山区疾病预防控制中心	湖北省武汉市洪山区	洪山区疾病预防控制中心			2012-04-06 15	继发	病原学阴性		李仁惠	2012-04-06	新患者	初治		2012-04-06							治疗	湖北省武汉市东湖高新技术开发区	武汉东湖新技术开发区左岭街社区卫生服务中心		完成疗程
		151	普通病案	湖北省武汉市洪山区	洪山区疾病预防控制中心	湖北省武汉市洪山区	洪山区疾病预防控制中心	420111016-2012-00204	151	19	男性	汉族	学生	本县区	420111002		转诊	2012-03-15	2012-04-05	21	阴性	2012-04-06	湖北省武汉市洪山区	洪山区疾病预防控制中心	湖北省武汉市洪山区	洪山区疾病预防控制中心			2012-04-06 10	继发	病原学阳性		吴杰	2012-04-06	新患者	初治		2012-04-06							治疗	湖北省武汉市洪山区	洪山区疾病预防控制中心		其他
		152	普通病案	湖北省武汉市硚口区	武汉市结核病防治所	湖北省武汉市硚口区	武汉市结核病防治所	420104019-2012-00148	152	17	女性	汉族	学生	本县区	420104004		转诊	2012-03-22	2012-04-05	14	阴性	2012-04-07	湖北省武汉市硚口区	武汉市结核病防治所	湖北省武汉市硚口区	武汉市结核病防治所			2012-04-06 17	继发	病原学阴性		李春清	2012-04-07	新患者	初治		2012-04-07							治疗	湖北省武汉市硚口区	武汉市结核病防治所		完成疗程
		153	普通病案	湖北省武汉市硚口区	武汉市结核病防治所	湖北省武汉市硚口区	武汉市结核病防治所	420104019-2012-00146	153	18	男性	汉族	学生	本县区	420104011		转诊	2012-03-16	2012-04-05	20	阴性	2012-04-07	湖北省武汉市硚口区	武汉市结核病防治所	湖北省武汉市硚口区	武汉市结核病防治所			2012-04-06 19	继发	病原学阴性		李春清	2012-04-07	新患者	初治		2012-04-07							治疗	湖北省武汉市硚口区	武汉市结核病防治所		完成疗程
		154	普通病案	湖北省武汉市江岸区	江岸区疾病预防控制中心	湖北省武汉市江岸区	江岸区疾病预防控制中心	420102000-2012-00123	154	18	男性	汉族	学生	本市其它县区	420102015		转诊	2012-03-26	2012-04-09	14			湖北省武汉市江岸区	江岸区疾病预防控制中心	湖北省武汉市江岸区	江岸区疾病预防控制中心			2012-04-09 10	继发	病原学阴性		许丽芳	2012-04-09	新患者	初治		2012-04-09							治疗	湖北省武汉市江岸区	江岸区花桥街第一社区卫生服务中心		完成疗程
		155	普通病案	湖北省武汉市江汉区	武汉市江汉区疾病预防控制中心	湖北省武汉市江汉区	武汉市江汉区疾病预防控制中心	420103013-2012-00099	155	18	男性	汉族	学生	本县区	420103001		追踪	2012-03-20	2012-03-23	3	阴性	2012-03-23	湖北省武汉市江汉区	武汉市江汉区疾病预防控制中心	湖北省武汉市江汉区	武汉市江汉区疾病预防控制中心			2012-04-09 14	继发	病原学阴性		赵丽	2012-04-09	新患者	初治		2012-04-09							治疗	湖北省武汉市江汉区	江汉区民族街社区卫生服务中心		不良反应
		156	普通病案	湖北省武汉市青山区	青山区结核病防治所	湖北省武汉市青山区	青山区结核病防治所	420107018-2012-00084	156	16	男性	汉族	学生	本县区	420107006		追踪	2011-09-12	2012-03-12	182			湖北省武汉市青山区	青山区结核病防治所	湖北省武汉市青山区	青山区结核病防治所			2012-04-09 10	继发	病原学阴性		郑和平	2012-04-09	新患者	初治		2012-04-09							治疗	湖北省武汉市青山区	青山区结核病防治所		完成疗程
		157	普通病案	湖北省武汉市硚口区	武汉市结核病防治所	湖北省武汉市硚口区	武汉市结核病防治所	420104019-2012-00152	157	17	男性	汉族	学生	本县区	420104003		转诊	2012-03-22	2012-04-07	16	阴性	2012-04-08	湖北省武汉市硚口区	武汉市结核病防治所	湖北省武汉市硚口区	武汉市结核病防治所			2012-04-08 17	继发	病原学阴性		李春清	2012-04-09	新患者	初治		2012-04-09							治疗	湖北省武汉市硚口区	武汉市结核病防治所		完成疗程
		158	普通病案	湖北省武汉市硚口区	武汉市结核病防治所	湖北省武汉市硚口区	武汉市结核病防治所	420104019-2012-00151	158	17	男性	汉族	学生	本县区	420104006		转诊	2012-03-22	2012-04-07	16	阴性	2012-04-08	湖北省武汉市硚口区	武汉市结核病防治所	湖北省武汉市硚口区	武汉市结核病防治所			2012-04-08 17	继发	病原学阴性		张秀华	2012-04-09	新患者	初治		2012-04-09							治疗	湖北省武汉市硚口区	武汉市结核病防治所		完成疗程
		159	普通病案	湖北省武汉市硚口区	武汉市结核病防治所	湖北省武汉市硚口区	武汉市结核病防治所	420104019-2012-00154	159	18	女性	汉族	学生	本县区	420104010		转诊	2012-03-28	2012-04-07	10	初筛阳性	2012-04-08	湖北省武汉市硚口区	武汉市结核病防治所	湖北省武汉市硚口区	武汉市结核病防治所			2012-04-08 17	继发	病原学阴性		张秀华	2012-04-09	新患者	初治		2012-04-09							治疗	湖北省武汉市硚口区	武汉市结核病防治所		完成疗程
		160	普通病案	湖北省武汉市硚口区	武汉市结核病防治所	湖北省武汉市硚口区	武汉市结核病防治所	420104019-2012-00153	160	18	男性	汉族	学生	本县区	420104009		转诊	2012-03-26	2012-04-07	12	阴性	2012-04-08	湖北省武汉市硚口区	武汉市结核病防治所	湖北省武汉市硚口区	武汉市结核病防治所			2012-04-08 17	继发	病原学阴性		张秀华	2012-04-09	新患者	初治		2012-04-09							治疗	湖北省武汉市硚口区	武汉市结核病防治所		完成疗程
		161	普通病案	湖北省武汉市洪山区	洪山区疾病预防控制中心	湖北省武汉市洪山区	洪山区疾病预防控制中心	420111016-2012-00210	161	20	女性	汉族	学生	本县区	420111002		转诊	2012-04-01	2012-04-06	5	阴性	2012-04-10	湖北省武汉市洪山区	洪山区疾病预防控制中心	湖北省武汉市洪山区	洪山区疾病预防控制中心			2012-04-10 11	继发	病原学阴性		吴杰	2012-04-10	新患者	初治		2012-04-10							治疗	湖北省武汉市洪山区	洪山区疾病预防控制中心		完成疗程
		162	普通病案	湖北省武汉市洪山区	洪山区疾病预防控制中心	湖北省武汉市洪山区	洪山区疾病预防控制中心	420111016-2012-00211	162	20	男性	汉族	学生	本县区	420111002		转诊	2012-03-26	2012-04-06	11	阴性	2012-04-10	湖北省武汉市洪山区	洪山区疾病预防控制中心	湖北省武汉市洪山区	洪山区疾病预防控制中心			2012-04-10 15	继发	病原学阴性		李仁惠	2012-04-10	新患者	初治		2012-04-10							治疗	湖北省武汉市洪山区	中国地质大学医院		完成疗程
		163	普通病案	湖北省武汉市洪山区	洪山区疾病预防控制中心	湖北省武汉市洪山区	洪山区疾病预防控制中心	420111016-2012-00212	163	21	女性	汉族	学生	本县区	420111011		转诊	2012-03-29	2012-04-07	9			湖北省武汉市洪山区	洪山区疾病预防控制中心	湖北省武汉市洪山区	洪山区疾病预防控制中心			2012-04-10 08	继发	病原学阴性		李仁惠	2012-04-10	新患者	初治		2012-04-10							治疗	湖北省武汉市洪山区	武汉市洪山区张家湾街社区卫生中心		完成疗程
		164	普通病案	湖北省武汉市洪山区	洪山区疾病预防控制中心	湖北省武汉市洪山区	洪山区疾病预防控制中心	420111016-2012-00214	164	21	男性	汉族	学生	本县区	420111001		转诊	2012-04-06	2012-04-08	2	阴性	2012-04-10	湖北省武汉市洪山区	洪山区疾病预防控制中心	湖北省武汉市洪山区	洪山区疾病预防控制中心			2012-04-10 14	继发	病原学阴性		李仁惠	2012-04-10	新患者	初治		2012-04-10							治疗	湖北省武汉市洪山区	洪山区珞南街理工大社区卫生服务中心		完成疗程
		165	普通病案	湖北省武汉市洪山区	洪山区疾病预防控制中心	湖北省武汉市洪山区	洪山区疾病预防控制中心	420111016-2012-00208	165	20	女性	汉族	学生	本县区	420111001		转诊	2012-02-17	2012-04-05	48	阴性	2012-04-10	湖北省武汉市洪山区	洪山区疾病预防控制中心	湖北省武汉市洪山区	洪山区疾病预防控制中心			2012-04-10 15	继发	病原学阴性		吴杰	2012-04-10	新患者	初治		2012-04-10							治疗	湖北省武汉市洪山区	洪山区珞南街理工大社区卫生服务中心		完成疗程
		166	普通病案	湖北省武汉市洪山区	洪山区疾病预防控制中心	湖北省武汉市洪山区	洪山区疾病预防控制中心	420111016-2012-00213	166	19	男性	汉族	学生	本县区	420111002		转诊	2012-03-31	2012-04-09	9	阴性	2012-04-10	湖北省武汉市洪山区	洪山区疾病预防控制中心	湖北省武汉市洪山区	洪山区疾病预防控制中心			2012-04-10 10	继发	病原学阴性		吴杰	2012-04-10	新患者	初治		2012-04-10							治疗	湖北省武汉市洪山区	洪山区关山街华中科技大学医院		完成疗程
		167	普通病案	湖北省武汉市洪山区	洪山区疾病预防控制中心	湖北省武汉市洪山区	洪山区疾病预防控制中心	420111016-2012-00209	167	21	男性	汉族	学生	本县区	420111001		转诊	2012-03-11	2012-04-01	21	阴性	2012-04-10	湖北省武汉市洪山区	洪山区疾病预防控制中心	湖北省武汉市洪山区	洪山区疾病预防控制中心			2012-04-10 12	继发	病原学阴性		李仁惠	2012-04-10	新患者	初治		2012-04-10							治疗	湖北省武汉市洪山区	洪山区珞南街理工大社区卫生服务中心		完成疗程
		168	普通病案	湖北省武汉市江夏区	武汉市江夏区疾病预防控制中心	湖北省武汉市江夏区	武汉市江夏区疾病预防控制中心	420115008-2012-00154	168	18	女性	汉族	学生	本县区	420115013		追踪	2012-04-06	2012-04-11	5	阴性	2012-04-12	湖北省武汉市江夏区	武汉市江夏区疾病预防控制中心	湖北省武汉市江夏区	武汉市江夏区疾病预防控制中心			2012-04-12 09	继发	病原学阴性		艾医生	2012-04-12	新患者	初治		2012-04-12							治疗	湖北省武汉市江夏区	武汉市江夏区山坡乡卫生院		完成疗程
		169	普通病案	湖北省武汉市江岸区	江岸区疾病预防控制中心	湖北省武汉市江岸区	江岸区疾病预防控制中心	420102000-2012-00134	169	18	女性	汉族	学生	本市其它县区	420102011		转诊	2012-03-17	2012-03-24	7			湖北省武汉市江岸区	江岸区疾病预防控制中心	湖北省武汉市江岸区	江岸区疾病预防控制中心			2012-04-13 11	继发	病原学阴性		曾洁	2012-04-13	新患者	初治		2012-04-13							治疗	湖北省武汉市江岸区	江岸区新村街社区卫生服务中心		完成疗程
		170	普通病案	湖北省武汉市江岸区	江岸区疾病预防控制中心	湖北省武汉市江岸区	江岸区疾病预防控制中心	420102000-2012-00135	170	18	男性	汉族	学生	本市其它县区	420102015		转诊	2012-01-27	2012-03-27	60	阴性	2012-03-27	湖北省武汉市江岸区	江岸区疾病预防控制中心	湖北省武汉市江岸区	江岸区疾病预防控制中心			2012-04-13 12	继发	病原学阳性		姚芳	2012-04-13	新患者	初治		2012-04-13							治疗	湖北省武汉市江岸区	江岸区花桥街第一社区卫生服务中心		治愈
		171	普通病案	湖北省武汉市江岸区	江岸区疾病预防控制中心	湖北省武汉市江岸区	江岸区疾病预防控制中心	420102000-2012-00137	171	17	男性	汉族	学生	本市其它县区	420102009		转诊	2012-01-24	2012-03-24	60	阴性	2012-03-24	湖北省武汉市江岸区	江岸区疾病预防控制中心	湖北省武汉市江岸区	江岸区疾病预防控制中心			2012-04-13 09	继发	病原学阴性		孙学智	2012-04-13	新患者	初治		2012-04-13							治疗	湖北省武汉市江岸区	江岸区劳动街社区卫生服务中心		完成疗程
		172	普通病案	湖北省武汉市洪山区	洪山区疾病预防控制中心	湖北省武汉市洪山区	洪山区疾病预防控制中心	420111016-2012-00218	172	25	男性	汉族	学生	本县区	420111002		追踪	2012-01-10	2012-04-11	92	阴性	2012-04-13	湖北省武汉市洪山区	洪山区疾病预防控制中心	湖北省武汉市洪山区	洪山区疾病预防控制中心			2012-04-13 10	继发	病原学阴性		李仁惠	2012-04-13	新患者	初治		2012-04-13							治疗	湖北省武汉市洪山区	洪山区疾病预防控制中心		完成疗程
		173	普通病案	湖北省武汉市洪山区	洪山区疾病预防控制中心	湖北省武汉市洪山区	洪山区疾病预防控制中心	420111016-2012-00216	173	21	男性	汉族	学生	本县区	420111002		转诊	2012-04-03	2012-04-11	8			湖北省武汉市洪山区	洪山区疾病预防控制中心	湖北省武汉市洪山区	洪山区疾病预防控制中心			2012-04-13 10	继发	病原学阴性		李仁惠	2012-04-13	新患者	初治		2012-04-13							治疗	湖北省武汉市洪山区	洪山区关山街华中科技大学医院		完成疗程
		174	普通病案	湖北省武汉市洪山区	洪山区疾病预防控制中心	湖北省武汉市洪山区	洪山区疾病预防控制中心	420111016-2012-00215	174	17	女性	汉族	学生	本县区	420111002		转诊	2012-03-31	2012-04-11	11	阴性	2012-04-13	湖北省武汉市洪山区	洪山区疾病预防控制中心	湖北省武汉市洪山区	洪山区疾病预防控制中心			2012-04-13 10	继发	病原学阴性		吴杰	2012-04-13	新患者	初治		2012-04-13							治疗	湖北省武汉市洪山区	武汉市第三医院光谷院区		完成疗程
		175	普通病案	湖北省武汉市洪山区	洪山区疾病预防控制中心	湖北省武汉市洪山区	洪山区疾病预防控制中心	420111016-2012-00219	175	19	男性	汉族	学生	本县区	420111011		转诊	2012-04-01	2012-04-12	11	阴性	2012-04-13	湖北省武汉市洪山区	洪山区疾病预防控制中心	湖北省武汉市洪山区	洪山区疾病预防控制中心			2012-04-13 10	继发	病原学阴性		吴杰	2012-04-13	新患者	初治		2012-04-13							治疗	湖北省武汉市洪山区	武汉市洪山区张家湾街社区卫生中心		完成疗程
		176	普通病案	湖北省武汉市洪山区	洪山区疾病预防控制中心	湖北省武汉市洪山区	洪山区疾病预防控制中心	420111016-2012-00217	176	21	女性	汉族	学生	本县区	420111002		转诊	2012-03-23	2012-04-11	19	阴性	2012-04-13	湖北省武汉市洪山区	洪山区疾病预防控制中心	湖北省武汉市洪山区	洪山区疾病预防控制中心			2012-04-13 08	继发	病原学阴性		吴杰	2012-04-13	新患者	初治		2012-04-13							治疗	湖北省武汉市洪山区	洪山区疾病预防控制中心		完成疗程
		177	普通病案	湖北省武汉市江岸区	江岸区疾病预防控制中心	湖北省武汉市江岸区	江岸区疾病预防控制中心	420102000-2012-00141	177	17	女性	汉族	学生	本市其它县区	420102017		转诊	2012-03-20	2012-03-21	1			湖北省武汉市江岸区	江岸区疾病预防控制中心	湖北省武汉市江岸区	江岸区疾病预防控制中心			2012-04-16 09	继发	病原学阴性		胡明	2012-04-16	新患者	初治		2012-04-16							治疗	湖北省武汉市江岸区	江岸区后湖街金桥社区卫生服务中心		完成疗程
		178	普通病案	湖北省武汉市武昌区	武昌区疾病预防控制中心	湖北省武汉市武昌区	武昌区疾病预防控制中心	420106010-2012-00181	178	24	男性	汉族	学生	本县区	420106003		转诊	2012-03-13	2012-04-03	21	阴性	2012-04-17	湖北省武汉市武昌区	武昌区疾病预防控制中心	湖北省武汉市武昌区	武昌区疾病预防控制中心			2012-04-17 10	继发	病原学阳性		刘文	2012-04-17	新患者	初治		2012-04-17							治疗				治愈
		179	普通病案	湖北省武汉市江夏区	武汉市江夏区疾病预防控制中心	湖北省武汉市江夏区	武汉市江夏区疾病预防控制中心	420115008-2012-00160	179	19	男性	汉族	学生	本县区	420115018		追踪	2012-04-15	2012-04-16	1	阴性	2012-04-17	湖北省武汉市江夏区	武汉市江夏区疾病预防控制中心	湖北省武汉市江夏区	武汉市江夏区疾病预防控制中心			2012-04-17 10	继发	病原学阳性		艾医生	2012-04-17	新患者	初治		2012-04-17							治疗	湖北省武汉市江夏区	武汉市江夏区湖泗镇卫生院		治愈
		180	普通病案	湖北省武汉市硚口区	武汉市结核病防治所	湖北省武汉市硚口区	武汉市结核病防治所	420104019-2012-00167	180	18	男性	汉族	学生	本县区	420104002		直接就诊	2012-03-20	2012-04-15	26	阴性	2012-04-17	湖北省武汉市硚口区	武汉市结核病防治所	湖北省武汉市硚口区	武汉市结核病防治所			2012-04-16 18	继发	病原学阴性		李春清	2012-04-17	新患者	初治		2012-04-17							治疗	湖北省武汉市硚口区	武汉市结核病防治所		完成疗程
		181	普通病案	湖北省武汉市洪山区	洪山区疾病预防控制中心	湖北省武汉市洪山区	洪山区疾病预防控制中心	420111016-2012-00226	181	21	女性	汉族	学生	本县区	420111011		转诊	2012-04-13	2012-04-15	2	阴性	2012-04-17	湖北省武汉市洪山区	洪山区疾病预防控制中心	湖北省武汉市洪山区	洪山区疾病预防控制中心			2012-04-17 14	继发	病原学阴性		吴杰	2012-04-17	新患者	初治		2012-04-17							治疗	湖北省武汉市洪山区	武汉市洪山区张家湾街社区卫生中心		完成疗程
		182	普通病案	湖北省武汉市洪山区	洪山区疾病预防控制中心	湖北省武汉市洪山区	洪山区疾病预防控制中心	420111016-2012-00223	182	18	男性	汉族	学生	本县区	420192004		转诊	2012-04-07	2012-04-14	7	阴性	2012-04-17	湖北省武汉市洪山区	洪山区疾病预防控制中心	湖北省武汉市洪山区	洪山区疾病预防控制中心			2012-04-17 14	继发	病原学阴性		李仁惠	2012-04-17	新患者	初治		2012-04-17							治疗	湖北省武汉市东湖高新技术开发区	武汉东湖新技术开发区花山街社区卫生服务中心		完成疗程
		183	普通病案	湖北省武汉市洪山区	洪山区疾病预防控制中心	湖北省武汉市洪山区	洪山区疾病预防控制中心	420111016-2012-00224	183	21	男性	汉族	学生	本县区	420192006		转诊	2012-04-01	2012-04-13	12	阴性	2012-04-17	湖北省武汉市洪山区	洪山区疾病预防控制中心	湖北省武汉市洪山区	洪山区疾病预防控制中心			2012-04-17 14	继发	病原学阴性		吴杰	2012-04-17	新患者	初治		2012-04-17							治疗	湖北省武汉市东湖高新技术开发区	武汉东湖新技术开发区花山街社区卫生服务中心		完成疗程
		184	普通病案	湖北省武汉市洪山区	洪山区疾病预防控制中心	湖北省武汉市洪山区	洪山区疾病预防控制中心	420111016-2012-00220	184	20	男性	汉族	学生	本县区	420111001		转诊	2012-03-28	2012-04-13	16	阴性	2012-04-17	湖北省武汉市洪山区	洪山区疾病预防控制中心	湖北省武汉市洪山区	洪山区疾病预防控制中心			2012-04-17 09	继发	病原学阴性		李仁惠	2012-04-17	新患者	初治		2012-04-17							治疗	湖北省武汉市洪山区	洪山区疾病预防控制中心		完成疗程
		185	普通病案	湖北省武汉市汉阳区	武汉市汉阳区结核病防治所	湖北省武汉市汉阳区	武汉市汉阳区结核病防治所	420105012-2012-00105	185	17	男性	汉族	学生	本县区	420105008		转诊	2012-03-16	2012-03-29	13	阴性	2012-04-16	湖北省武汉市汉阳区	武汉市汉阳区结核病防治所	湖北省武汉市汉阳区	武汉市汉阳区结核病防治所			2012-04-18 10	继发	病原学阴性		朱建	2012-04-18	新患者	初治	2012-06-15	2012-04-18							治疗	湖北省武汉市汉阳区	汉阳区琴断口街社区卫生服务中心		完成疗程
		186	普通病案	湖北省武汉市汉阳区	武汉市汉阳区结核病防治所	湖北省武汉市汉阳区	武汉市汉阳区结核病防治所	420105012-2012-00100	186	17	男性	汉族	学生	本县区	420105009		转诊	2012-03-13	2012-03-27	14	阴性	2012-04-12	湖北省武汉市汉阳区	武汉市汉阳区结核病防治所	湖北省武汉市汉阳区	武汉市汉阳区结核病防治所			2012-04-18 10	继发	病原学阴性		朱建	2012-04-18	新患者	初治	2012-06-12	2012-04-18							治疗	湖北省武汉市汉阳区	武汉市汉阳区二桥街社区卫生服务中心		完成疗程
		187	普通病案	湖北省武汉市汉阳区	武汉市汉阳区结核病防治所	湖北省武汉市汉阳区	武汉市汉阳区结核病防治所	420105012-2012-00092	187	22	男性	汉族	学生	本县区	420105004		追踪	2012-03-02	2012-03-09	7	阴性	2012-03-10	湖北省武汉市汉阳区	武汉市汉阳区结核病防治所	湖北省武汉市汉阳区	武汉市汉阳区结核病防治所			2012-04-18 09	继发	病原学阳性		朱建	2012-04-18	新患者	初治	2012-05-10	2012-04-18							治疗	湖北省武汉市汉阳区	汉阳区晴川街社区卫生服务中心		治愈
		188	普通病案	湖北省武汉市汉阳区	武汉市汉阳区结核病防治所	湖北省武汉市汉阳区	武汉市汉阳区结核病防治所	420105012-2012-00096	188	20	女性	汉族	学生	本市其它县区	420105010		转诊	2012-03-11	2012-03-21	10	阴性	2012-04-12	湖北省武汉市汉阳区	武汉市汉阳区结核病防治所	湖北省武汉市汉阳区	武汉市汉阳区结核病防治所			2012-04-18 09	继发	病原学阴性		朱建	2012-04-18	新患者	初治	2012-06-12	2012-04-18							治疗	湖北省武汉市汉阳区	汉阳区永丰街社区卫生服务中心		完成疗程
		189	普通病案	湖北省武汉市黄陂区	武汉市黄陂区疾病预防控制中心	湖北省武汉市黄陂区	武汉市黄陂区疾病预防控制中心	420116003-2012-00227	189	24	男性	汉族	学生	本市其它县区	420116011		追踪	2012-03-20	2012-04-20	31			湖北省武汉市黄陂区	武汉市黄陂区疾病预防控制中心	湖北省武汉市黄陂区	武汉市黄陂区疾病预防控制中心			2012-04-20 08	继发	病原学阴性		蔡逸民	2012-04-20	新患者	初治		2012-04-20							治疗	湖北省武汉市黄陂区	武汉市黄陂区李家集街道中心卫生院		完成疗程
		190	普通病案	湖北省武汉市江夏区	武汉市江夏区疾病预防控制中心	湖北省武汉市江夏区	武汉市江夏区疾病预防控制中心	420115008-2012-00173	190	20	女性	汉族	学生	本县区	420115001		追踪	2012-02-29	2012-04-19	50	阴性	2012-04-20	湖北省武汉市江夏区	武汉市江夏区疾病预防控制中心	湖北省武汉市江夏区	武汉市江夏区疾病预防控制中心			2012-04-20 10	继发	病原学阴性		艾医生	2012-04-20	新患者	初治		2012-04-20							治疗	湖北省武汉市江夏区	武汉市江夏区纸坊社区卫生服务中心		完成疗程
		191	普通病案	湖北省武汉市洪山区	洪山区疾病预防控制中心	湖北省武汉市洪山区	洪山区疾病预防控制中心	420111016-2012-00227	191	23	男性	汉族	学生	本县区	420111001		转诊	2012-04-09	2012-04-12	3	阴性	2012-04-20	湖北省武汉市洪山区	洪山区疾病预防控制中心	湖北省武汉市洪山区	洪山区疾病预防控制中心			2012-04-20 10	继发	病原学阴性		李仁惠	2012-04-20	新患者	初治		2012-04-20							治疗	湖北省武汉市洪山区	洪山区珞南街理工大社区卫生服务中心		完成疗程
		192	普通病案	湖北省武汉市江夏区	武汉市江夏区疾病预防控制中心	湖北省武汉市江夏区	武汉市江夏区疾病预防控制中心	420115008-2012-00178	192	21	女性	汉族	学生	本县区	420115001		追踪	2012-03-13	2012-04-22	40	阴性	2012-04-23	湖北省武汉市江夏区	武汉市江夏区疾病预防控制中心	湖北省武汉市江夏区	武汉市江夏区疾病预防控制中心			2012-04-23 10	继发	病原学阴性		艾医生	2012-04-23	新患者	初治		2012-04-23							治疗	湖北省武汉市江夏区	武汉市江夏区纸坊社区卫生服务中心		完成疗程
		193	普通病案	湖北省武汉市硚口区	武汉市结核病防治所	湖北省武汉市硚口区	武汉市结核病防治所	420104019-2012-00180	193	15	女性	汉族	学生	本县区	420104006		转诊	2012-04-02	2012-04-21	19	阴性	2012-04-23	湖北省武汉市硚口区	武汉市结核病防治所	湖北省武汉市硚口区	武汉市结核病防治所			2012-04-22 17	继发	病原学阴性		张秀华	2012-04-23	新患者	初治		2012-04-23							治疗	湖北省武汉市硚口区	武汉市结核病防治所		完成疗程
		194	普通病案	湖北省武汉市洪山区	洪山区疾病预防控制中心	湖北省武汉市洪山区	洪山区疾病预防控制中心	420111016-2012-00234	194	21	男性	汉族	学生	本县区	420111002		转诊	2012-04-16	2012-04-21	5	阴性	2012-04-23	湖北省武汉市洪山区	洪山区疾病预防控制中心	湖北省武汉市洪山区	洪山区疾病预防控制中心			2012-04-23 09	继发	病原学阴性		吴杰	2012-04-23	新患者	初治		2012-04-23							治疗	湖北省武汉市洪山区	洪山区关山街华中科技大学医院		完成疗程
		195	普通病案	湖北省武汉市江岸区	江岸区疾病预防控制中心	湖北省武汉市江岸区	江岸区疾病预防控制中心	420102000-2012-00155	195	18	男性	汉族	学生	本市其它县区	420102015		转诊	2012-03-21	2012-04-07	17	阴性	2012-04-07	湖北省武汉市江岸区	江岸区疾病预防控制中心	湖北省武汉市江岸区	江岸区疾病预防控制中心			2012-04-24 09	继发	病原学阴性		孙学智	2012-04-24	新患者	初治		2012-04-24							治疗	湖北省武汉市江岸区	江岸区花桥街第二社区卫生服务中心		完成疗程
		196	普通病案	湖北省武汉市东西湖区	东西湖区结核病防治所	湖北省武汉市东西湖区	东西湖区结核病防治所	420112019-2012-00062	196	18	女性	汉族	学生	本县区	420112001		追踪	2012-03-21	2012-04-24	34	阴性	2012-04-01	湖北省武汉市东西湖区	东西湖区结核病防治所	湖北省武汉市东西湖区	东西湖区结核病防治所			2012-04-24 08	继发	病原学阴性		孟刚	2012-04-24	新患者	初治	2012-04-24	2012-04-24							治疗	湖北省武汉市东西湖区	东西湖区吴家山街社区卫生服务中心		完成疗程
		197	普通病案	湖北省武汉市汉阳区	武汉市汉阳区结核病防治所	湖北省武汉市汉阳区	武汉市汉阳区结核病防治所	420105012-2012-00111	197	17	女性	汉族	学生	本县区	420105009		转诊	2012-03-12	2012-03-27	15	阴性	2012-03-31	湖北省武汉市汉阳区	武汉市汉阳区结核病防治所	湖北省武汉市汉阳区	武汉市汉阳区结核病防治所			2012-04-25 10	继发	病原学阴性		朱建	2012-04-25	新患者	初治	2012-05-31	2012-04-25							治疗	湖北省武汉市汉阳区	武汉市汉阳区二桥街社区卫生服务中心		完成疗程
		198	普通病案	湖北省武汉市汉阳区	武汉市汉阳区结核病防治所	湖北省武汉市汉阳区	武汉市汉阳区结核病防治所	420105012-2012-00119	198	18	男性	汉族	学生	本县区	420105009		转诊	2012-03-12	2012-03-22	10	阴性	2012-04-25	湖北省武汉市汉阳区	武汉市汉阳区结核病防治所	湖北省武汉市汉阳区	武汉市汉阳区结核病防治所			2012-04-25 12	继发	病原学阴性		朱建	2012-04-25	新患者	初治	2012-06-26	2012-04-25							治疗	湖北省武汉市汉阳区	武汉市汉阳区二桥街社区卫生服务中心		完成疗程
		199	普通病案	湖北省武汉市江汉区	武汉市江汉区疾病预防控制中心	湖北省武汉市江汉区	武汉市江汉区疾病预防控制中心	420103013-2012-00127	199	19	女性	汉族	学生	本县区	420103009		转诊	2012-04-11	2012-04-16	5	阴性	2012-04-17	湖北省武汉市江汉区	武汉市江汉区疾病预防控制中心	湖北省武汉市江汉区	武汉市江汉区疾病预防控制中心			2012-04-26 10	继发	病原学阴性		刘妍丽	2012-04-26	新患者	初治		2012-04-26							治疗				完成疗程
		200	普通病案	湖北省武汉市洪山区	洪山区疾病预防控制中心	湖北省武汉市洪山区	洪山区疾病预防控制中心	420111016-2012-00241	200	20	女性	汉族	学生	本县区	420111002		转诊	2012-04-14	2012-04-25	11	阴性	2012-04-26	湖北省武汉市洪山区	洪山区疾病预防控制中心	湖北省武汉市洪山区	洪山区疾病预防控制中心			2012-04-26 14	继发	病原学阴性		吴杰	2012-04-26	新患者	初治		2012-04-26							治疗	湖北省武汉市洪山区	洪山区疾病预防控制中心		完成疗程
		201	普通病案	湖北省武汉市洪山区	洪山区疾病预防控制中心	湖北省武汉市洪山区	洪山区疾病预防控制中心	420111016-2012-00237	201	23	女性	汉族	学生	本县区	420111001		转诊	2012-04-18	2012-04-24	6	阴性	2012-04-26	湖北省武汉市洪山区	洪山区疾病预防控制中心	湖北省武汉市洪山区	洪山区疾病预防控制中心			2012-04-26 14	继发	病原学阴性		吴杰	2012-04-26	新患者	初治		2012-04-26							治疗	湖北省武汉市洪山区	武汉市洪山区中医医院		完成疗程
		202	普通病案	湖北省武汉市洪山区	洪山区疾病预防控制中心	湖北省武汉市洪山区	洪山区疾病预防控制中心	420111016-2012-00238	202	22	女性	汉族	学生	本县区	420111001		转诊	2012-04-18	2012-04-24	6	阴性	2012-04-26	湖北省武汉市洪山区	洪山区疾病预防控制中心	湖北省武汉市洪山区	洪山区疾病预防控制中心			2012-04-26 14	继发	病原学阴性		李仁惠	2012-04-26	新患者	初治		2012-04-26							治疗	湖北省武汉市洪山区	洪山区珞南街华中师范大学医院		完成疗程
		203	普通病案	湖北省武汉市洪山区	洪山区疾病预防控制中心	湖北省武汉市洪山区	洪山区疾病预防控制中心	420111016-2012-00240	203	26	男性	汉族	学生	本县区	420111001		转诊	2012-04-19	2012-04-25	6	阴性	2012-04-26	湖北省武汉市洪山区	洪山区疾病预防控制中心	湖北省武汉市洪山区	洪山区疾病预防控制中心			2012-04-26 14	继发	病原学阴性		李仁惠	2012-04-26	新患者	初治		2012-04-26							治疗	湖北省武汉市洪山区	洪山区珞南街理工大社区卫生服务中心		完成疗程
		204	普通病案	湖北省武汉市江岸区	江岸区疾病预防控制中心	湖北省武汉市江岸区	江岸区疾病预防控制中心	420102000-2012-00168	204	15	男性	汉族	学生	本市其它县区	420102012		转诊	2012-04-01	2012-04-18	17	阴性	2012-04-18	湖北省武汉市江岸区	江岸区疾病预防控制中心	湖北省武汉市江岸区	江岸区疾病预防控制中心			2012-04-28 09	继发	病原学阳性		杨澄清	2012-04-28	新患者	初治		2012-04-28							治疗	湖北省武汉市江岸区	江岸区丹水池街社区卫生服务中心		治愈
		205	普通病案	湖北省武汉市江岸区	江岸区疾病预防控制中心	湖北省武汉市江岸区	江岸区疾病预防控制中心	420102000-2012-00169	205	18	男性	汉族	学生	本市其它县区	420102012		转诊	2012-03-04	2012-04-04	31	阴性	2012-04-04	湖北省武汉市江岸区	江岸区疾病预防控制中心	湖北省武汉市江岸区	江岸区疾病预防控制中心			2012-04-28 14	继发	病原学阴性		孙学智	2012-04-28	新患者	初治		2012-04-28							治疗	湖北省武汉市江岸区	江岸区丹水池街社区卫生服务中心		完成疗程
		206	普通病案	湖北省武汉市洪山区	洪山区疾病预防控制中心	湖北省武汉市洪山区	洪山区疾病预防控制中心	420111016-2012-00244	206	22	女性	汉族	学生	本县区	420111001		转诊	2012-04-15	2012-04-26	11	阴性	2012-04-28	湖北省武汉市洪山区	洪山区疾病预防控制中心	湖北省武汉市洪山区	洪山区疾病预防控制中心			2012-04-28 15	继发	病原学阴性		李仁惠	2012-04-28	新患者	初治		2012-04-28							治疗	湖北省武汉市洪山区	洪山区珞南街华中师范大学医院		完成疗程
		207	普通病案	湖北省武汉市洪山区	洪山区疾病预防控制中心	湖北省武汉市洪山区	洪山区疾病预防控制中心	420111016-2012-00243	207	17	女性	汉族	学生	本县区	420111001		转诊	2012-04-23	2012-04-26	3	阴性	2012-04-28	湖北省武汉市洪山区	洪山区疾病预防控制中心	湖北省武汉市洪山区	洪山区疾病预防控制中心			2012-04-28 14	继发	病原学阳性		吴杰	2012-04-28	新患者	初治		2012-04-28							治疗	湖北省武汉市洪山区	武汉市洪山区中医医院		治愈
		208	普通病案	湖北省武汉市新洲区	新洲区疾病预防控制中心	湖北省武汉市新洲区	新洲区疾病预防控制中心	420117002-2012-00233	208	22	男性	汉族	学生	本县区	420117006		转诊	2012-04-16	2012-04-30	14	阴性	2012-04-30	湖北省武汉市新洲区	新洲区疾病预防控制中心	湖北省武汉市新洲区	新洲区疾病预防控制中心			2012-04-30 14	继发	病原学阴性		胡国华	2012-04-30	新患者	初治		2012-04-30							治疗	湖北省武汉市新洲区	新洲区三店街卫生院		完成疗程
		209	普通病案	湖北省武汉市武昌区	武昌区疾病预防控制中心	湖北省武汉市武昌区	武昌区疾病预防控制中心	420106010-2012-00231	209	22	男性	汉族	学生	本市其它县区	420106002		转诊	2012-03-01	2012-04-23	53	阴性	2012-05-03	湖北省武汉市武昌区	武昌区疾病预防控制中心	湖北省武汉市武昌区	武昌区疾病预防控制中心			2012-05-03 09	继发	病原学阳性		刘文	2012-05-03	新患者	初治		2012-05-03							治疗				治愈
		210	普通病案	湖北省武汉市江夏区	武汉市江夏区疾病预防控制中心	湖北省武汉市江夏区	武汉市江夏区疾病预防控制中心	420115008-2012-00217	210	17	男性	汉族	学生	本县区	420115001		追踪	2012-03-27	2012-05-02	36	阴性	2012-05-03	湖北省武汉市江夏区	武汉市江夏区疾病预防控制中心	湖北省武汉市江夏区	武汉市江夏区疾病预防控制中心			2012-05-03 15	继发	病原学阴性		熊医生	2012-05-03	新患者	初治		2012-05-03							治疗	湖北省武汉市江夏区	武汉市江夏区纸坊社区卫生服务中心		完成疗程
		211	普通病案	湖北省武汉市东西湖区	东西湖区结核病防治所	湖北省武汉市东西湖区	东西湖区结核病防治所	420112019-2012-00074	211	22	男性	汉族	学生	本县区	420112001		直接就诊	2012-04-11	2012-05-03	22			湖北省武汉市东西湖区	东西湖区结核病防治所	湖北省武汉市东西湖区	东西湖区结核病防治所			2012-05-03 15	继发	病原学阴性		胡才生	2012-05-03	新患者	初治		2012-05-03							治疗	湖北省武汉市东西湖区	东西湖区吴家山街社区卫生服务中心		完成疗程
		212	普通病案	湖北省武汉市洪山区	洪山区疾病预防控制中心	湖北省武汉市洪山区	洪山区疾病预防控制中心	420111016-2012-00246	212	22	女性	汉族	学生	本县区	420111002		转诊	2012-04-25	2012-04-29	4	阴性	2012-05-03	湖北省武汉市洪山区	洪山区疾病预防控制中心	湖北省武汉市洪山区	洪山区疾病预防控制中心			2012-05-03 08	继发	病原学阴性		李仁惠	2012-05-03	新患者	初治		2012-05-03							治疗	湖北省武汉市洪山区	洪山区关山街华中科技大学医院		完成疗程
		213	普通病案	湖北省武汉市洪山区	洪山区疾病预防控制中心	湖北省武汉市洪山区	洪山区疾病预防控制中心	420111016-2012-00245	213	23	女性	汉族	学生	本县区	420111001		转诊	2012-04-28	2012-04-30	2	阴性	2012-05-03	湖北省武汉市洪山区	洪山区疾病预防控制中心	湖北省武汉市洪山区	洪山区疾病预防控制中心			2012-05-03 08	继发	病原学阴性		吴杰	2012-05-03	新患者	初治		2012-05-03							治疗	湖北省武汉市洪山区	武汉市洪山区中医医院		完成疗程
		214	普通病案	湖北省武汉市洪山区	洪山区疾病预防控制中心	湖北省武汉市洪山区	洪山区疾病预防控制中心	420111016-2012-00251	214	23	男性	汉族	学生	本县区	420111002		转诊	2012-04-22	2012-04-24	2	阴性	2012-05-03	湖北省武汉市洪山区	洪山区疾病预防控制中心	湖北省武汉市洪山区	洪山区疾病预防控制中心			2012-05-03 14	继发	病原学阴性		李仁惠	2012-05-03	新患者	初治		2012-05-03							治疗	湖北省武汉市洪山区	洪山区疾病预防控制中心		完成疗程
		215	普通病案	湖北省武汉市汉南区	武汉市汉南区疾病预防控制中心	湖北省武汉市汉南区	武汉市汉南区疾病预防控制中心	420113006-2012-00213	215	21	女性	汉族	学生	本县区	420113096		直接就诊	2012-05-01	2012-05-03	2	阴性	2012-05-03	湖北省武汉市汉南区	武汉市汉南区疾病预防控制中心	湖北省武汉市汉南区	武汉市汉南区疾病预防控制中心			2012-05-03 14	继发	病原学阴性		熊勤涛	2012-05-03	新患者	初治		2012-05-03							治疗				完成疗程
		216	普通病案	湖北省武汉市洪山区	洪山区疾病预防控制中心	湖北省武汉市洪山区	洪山区疾病预防控制中心	420111016-2012-00249	216	22	男性	汉族	学生	本县区	420111002		转诊	2012-04-26	2012-04-27	1	阴性	2012-05-03	湖北省武汉市洪山区	洪山区疾病预防控制中心	湖北省武汉市洪山区	洪山区疾病预防控制中心			2012-05-03 10	继发	病原学阴性		李仁惠	2012-05-03	新患者	初治		2012-05-03							治疗	湖北省武汉市洪山区	洪山区关山街华中科技大学医院		完成疗程
		217	普通病案	湖北省武汉市新洲区	新洲区疾病预防控制中心	湖北省武汉市新洲区	新洲区疾病预防控制中心	420117002-2012-00239	217	9	男性	汉族	学生	本县区	420117002		其它	2012-02-29	2012-05-07	68	阴性	2012-05-07	湖北省武汉市新洲区	新洲区疾病预防控制中心	湖北省武汉市新洲区	新洲区疾病预防控制中心			2012-05-07 09	继发	病原学阴性		杨丹	2012-05-07	新患者	初治		2012-05-07							治疗	湖北省武汉市新洲区	新洲区阳逻街卫生院		完成疗程
		218	普通病案	湖北省武汉市青山区	青山区结核病防治所	湖北省武汉市青山区	青山区结核病防治所	420107018-2012-00108	218	22	男性	汉族	学生	本县区	420107001		转诊	2012-04-27	2012-05-03	6			湖北省武汉市青山区	青山区结核病防治所	湖北省武汉市青山区	青山区结核病防治所			2012-05-07 10	继发	病原学阴性		郑和平	2012-05-07	新患者	初治		2012-05-07							治疗	湖北省武汉市青山区	青山区结核病防治所		完成疗程
		219	普通病案	湖北省武汉市洪山区	洪山区疾病预防控制中心	湖北省武汉市洪山区	洪山区疾病预防控制中心	420111016-2012-00256	219	21	男性	汉族	学生	本县区	420111003		转诊	2012-04-16	2012-05-03	17	阴性	2012-05-07	湖北省武汉市洪山区	洪山区疾病预防控制中心	湖北省武汉市洪山区	洪山区疾病预防控制中心			2012-05-07 10	继发	病原学阳性		吴杰	2012-05-07	新患者	初治		2012-05-07							治疗	湖北省武汉市洪山区	湖北工业大学医院		其他
		220	普通病案	湖北省武汉市洪山区	洪山区疾病预防控制中心	湖北省武汉市洪山区	洪山区疾病预防控制中心	420111016-2012-00255	220	36	男性	汉族	学生	本县区	420111008		转诊	2012-04-21	2012-05-02	11	阴性	2012-05-07	湖北省武汉市洪山区	洪山区疾病预防控制中心	湖北省武汉市洪山区	洪山区疾病预防控制中心			2012-05-07 09	继发	病原学阴性		李仁惠	2012-05-07	新患者	初治		2012-05-07							治疗	湖北省武汉市洪山区	洪山区和平街社区卫生服务中心		完成疗程
		221	普通病案	湖北省武汉市江夏区	武汉市江夏区疾病预防控制中心	湖北省武汉市江夏区	武汉市江夏区疾病预防控制中心	420115008-2012-00229	221	17	女性	汉族	学生	本县区	420115001		追踪	2012-03-21	2012-05-07	47	阴性	2012-05-08	湖北省武汉市江夏区	武汉市江夏区疾病预防控制中心	湖北省武汉市江夏区	武汉市江夏区疾病预防控制中心			2012-05-08 08	继发	病原学阴性		艾医生	2012-05-08	新患者	初治		2012-05-08							治疗	湖北省武汉市江夏区	武汉市江夏区纸坊社区卫生服务中心		完成疗程
		222	普通病案	湖北省武汉市汉阳区	武汉市汉阳区结核病防治所	湖北省武汉市汉阳区	武汉市汉阳区结核病防治所	420105012-2012-00127	222	14	男性	汉族	学生	本县区	420105007		转诊	2012-04-11	2012-04-17	6	阴性	2012-04-18	湖北省武汉市汉阳区	武汉市汉阳区结核病防治所	湖北省武汉市汉阳区	武汉市汉阳区结核病防治所			2012-05-09 09	继发	病原学阴性		朱建	2012-05-09	新患者	初治	2012-06-18	2012-05-09							治疗	湖北省武汉市汉阳区	汉阳区五里街社区卫生服务中心		完成疗程
		223	普通病案	湖北省武汉市汉阳区	武汉市汉阳区结核病防治所	湖北省武汉市汉阳区	武汉市汉阳区结核病防治所	420105012-2012-00126	223	18	女性	汉族	学生	本县区	420105007		转诊	2012-03-12	2012-03-21	9	阴性	2012-03-22	湖北省武汉市汉阳区	武汉市汉阳区结核病防治所	湖北省武汉市汉阳区	武汉市汉阳区结核病防治所			2012-05-09 09	继发	病原学阴性		朱建	2012-05-09	新患者	初治	2012-05-22	2012-05-09							治疗	湖北省武汉市汉阳区	汉阳区五里街社区卫生服务中心		完成疗程
		224	普通病案	湖北省武汉市江夏区	武汉市江夏区疾病预防控制中心	湖北省武汉市江夏区	武汉市江夏区疾病预防控制中心	420115008-2012-00232	224	18	男性	汉族	学生	本县区	420115001		直接就诊	2012-04-30	2012-05-08	8			湖北省武汉市江夏区	武汉市江夏区疾病预防控制中心	湖北省武汉市江夏区	武汉市江夏区疾病预防控制中心			2012-05-09 17	继发	病原学阴性		艾医生	2012-05-09	新患者	初治		2012-05-09							治疗	湖北省武汉市江夏区	武汉市江夏区纸坊社区卫生服务中心		完成疗程
		225	普通病案	湖北省武汉市洪山区	洪山区疾病预防控制中心	湖北省武汉市洪山区	洪山区疾病预防控制中心	420111016-2012-00258	225	21	男性	汉族	学生	本县区	420111001		转诊	2012-04-24	2012-05-04	10			湖北省武汉市洪山区	洪山区疾病预防控制中心	湖北省武汉市洪山区	洪山区疾病预防控制中心			2012-05-09 11	继发	病原学阴性		李仁惠	2012-05-09	新患者	初治		2012-05-09							治疗	湖北省武汉市洪山区	洪山区珞南街理工大社区卫生服务中心		完成疗程
		226	普通病案	湖北省武汉市硚口区	武汉市结核病防治所	湖北省武汉市硚口区	武汉市结核病防治所	420104019-2012-00209	226	15	男性	汉族	学生	本县区	420104006		转诊	2012-05-06	2012-05-09	3	阴性	2012-05-11	湖北省武汉市硚口区	武汉市结核病防治所	湖北省武汉市硚口区	武汉市结核病防治所			2012-05-10 09	继发	病原学阳性		张秀华	2012-05-10	新患者	初治		2012-05-10							治疗	湖北省武汉市硚口区	武汉市结核病防治所		治愈
		227	普通病案	湖北省武汉市洪山区	洪山区疾病预防控制中心	湖北省武汉市洪山区	洪山区疾病预防控制中心	420111016-2012-00261	227	27	男性	汉族	学生	本县区	420111002		转诊	2012-05-04	2012-05-09	5	阴性	2012-05-10	湖北省武汉市洪山区	洪山区疾病预防控制中心	湖北省武汉市洪山区	洪山区疾病预防控制中心			2012-05-10 09	继发	病原学阴性		李仁惠	2012-05-10	新患者	初治		2012-05-10							治疗	湖北省武汉市洪山区	洪山区关山街华中科技大学医院		完成疗程
		228	普通病案	湖北省武汉市洪山区	洪山区疾病预防控制中心	湖北省武汉市洪山区	洪山区疾病预防控制中心	420111016-2012-00264	228	22	男性	汉族	学生	本县区	420111003		转诊	2012-05-01	2012-05-07	6			湖北省武汉市洪山区	洪山区疾病预防控制中心	湖北省武汉市洪山区	洪山区疾病预防控制中心			2012-05-10 09	继发	病原学阴性		吴杰	2012-05-10	新患者	初治		2012-05-10							治疗	湖北省武汉市洪山区	湖北工业大学医院		完成疗程
		229	普通病案	湖北省武汉市洪山区	洪山区疾病预防控制中心	湖北省武汉市洪山区	洪山区疾病预防控制中心	420111016-2012-00263	229	22	男性	汉族	学生	本县区	420111002		转诊	2012-05-04	2012-05-09	5	阴性	2012-05-10	湖北省武汉市洪山区	洪山区疾病预防控制中心	湖北省武汉市洪山区	洪山区疾病预防控制中心			2012-05-10 09	继发	病原学阴性		吴杰	2012-05-10	新患者	初治		2012-05-10							治疗	湖北省武汉市洪山区	武汉市第三医院光谷院区		完成疗程
		230	普通病案	湖北省武汉市黄陂区	武汉市黄陂区疾病预防控制中心	湖北省武汉市黄陂区	武汉市黄陂区疾病预防控制中心	420116003-2012-00282	230	17	男性	汉族	学生	本县区	420116001		追踪	2012-04-13	2012-05-11	28			湖北省武汉市黄陂区	武汉市黄陂区疾病预防控制中心	湖北省武汉市黄陂区	武汉市黄陂区疾病预防控制中心			2012-05-11 10	继发	病原学阴性		吴汉先	2012-05-11	新患者	初治		2012-05-11							治疗	湖北省武汉市黄陂区	武汉市黄陂区鲁台社区卫生服务中心		完成疗程
		231	普通病案	湖北省武汉市青山区	青山区结核病防治所	湖北省武汉市青山区	青山区结核病防治所	420107018-2012-00117	231	22	男性	汉族	学生	本市其它县区	420107001		转诊	2012-04-28	2012-05-07	9	阴性	2012-05-11	湖北省武汉市青山区	青山区结核病防治所	湖北省武汉市青山区	青山区结核病防治所			2012-05-11 10	继发	病原学阴性		郑和平	2012-05-11	新患者	初治		2012-05-11							治疗	湖北省武汉市青山区	青山区结核病防治所		完成疗程
		232	普通病案	湖北省武汉市东西湖区	东西湖区结核病防治所	湖北省武汉市东西湖区	东西湖区结核病防治所	420112019-2012-00081	232	24	男性	汉族	学生	本县区	420112400		转诊	2012-04-12	2012-05-11	29			湖北省武汉市东西湖区	东西湖区结核病防治所	湖北省武汉市东西湖区	东西湖区结核病防治所			2012-05-11 16	继发	病原学阴性		胡才生	2012-05-11	新患者	初治		2012-05-11							治疗	湖北省武汉市东西湖区	常青花园社区卫生服务中心		完成疗程
		233	普通病案	湖北省武汉市洪山区	洪山区疾病预防控制中心	湖北省武汉市洪山区	洪山区疾病预防控制中心	420111016-2012-00265	233	19	男性	汉族	学生	本县区	420111001		转诊	2012-05-01	2012-05-03	2	阴性	2012-05-11	湖北省武汉市洪山区	洪山区疾病预防控制中心	湖北省武汉市洪山区	洪山区疾病预防控制中心			2012-05-11 10	继发	病原学阴性		吴杰	2012-05-11	新患者	初治		2012-05-11							治疗	湖北省武汉市洪山区	洪山区珞南街理工大社区卫生服务中心		完成疗程
		234	普通病案	湖北省武汉市洪山区	洪山区疾病预防控制中心	湖北省武汉市洪山区	洪山区疾病预防控制中心	420111016-2012-00267	234	21	女性	汉族	学生	本县区	420111001		转诊	2012-05-02	2012-05-10	8	阴性	2012-05-11	湖北省武汉市洪山区	洪山区疾病预防控制中心	湖北省武汉市洪山区	洪山区疾病预防控制中心			2012-05-11 10	继发	病原学阴性		李仁惠	2012-05-11	新患者	初治		2012-05-11							治疗	湖北省武汉市洪山区	洪山区珞南街华中师范大学医院		完成疗程
		235	普通病案	湖北省武汉市武昌区	武昌区疾病预防控制中心	湖北省武汉市武昌区	武昌区疾病预防控制中心	420106010-2012-00249	235	16	男性	汉族	学生	本市其它县区	420106005		转诊	2012-02-11	2012-02-24	13	阴性	2012-05-15	湖北省武汉市武昌区	武昌区疾病预防控制中心	湖北省武汉市武昌区	武昌区疾病预防控制中心			2012-05-15 08	继发	病原学阴性		刘文	2012-05-15	新患者	初治		2012-05-15							治疗				完成疗程
		236	普通病案	湖北省武汉市江夏区	武汉市江夏区疾病预防控制中心	湖北省武汉市江夏区	武汉市江夏区疾病预防控制中心	420115008-2012-00239	236	23	男性	汉族	学生	本县区	420115001		转诊	2012-04-01	2012-05-14	43	阴性	2012-05-15	湖北省武汉市江夏区	武汉市江夏区疾病预防控制中心	湖北省武汉市江夏区	武汉市江夏区疾病预防控制中心			2012-05-15 09	继发	病原学阴性		艾医生	2012-05-15	新患者	初治		2012-05-15							治疗	湖北省武汉市江夏区	武汉市江夏区纸坊社区卫生服务中心		完成疗程
		237	普通病案	湖北省武汉市洪山区	洪山区疾病预防控制中心	湖北省武汉市洪山区	洪山区疾病预防控制中心	420111016-2012-00270	237	22	女性	汉族	学生	本县区	420111001		转诊	2012-05-03	2012-05-08	5	阴性	2012-05-15	湖北省武汉市洪山区	洪山区疾病预防控制中心	湖北省武汉市洪山区	洪山区疾病预防控制中心			2012-05-15 09	继发	病原学阳性		吴杰	2012-05-15	新患者	初治		2012-05-15							治疗	湖北省武汉市洪山区	武汉市洪山区中医医院		治愈
		238	普通病案	湖北省武汉市洪山区	洪山区疾病预防控制中心	湖北省武汉市洪山区	洪山区疾病预防控制中心	420111016-2012-00274	238	22	男性	汉族	学生	本县区	420111002		转诊	2012-04-27	2012-05-12	15	阴性	2012-05-15	湖北省武汉市洪山区	洪山区疾病预防控制中心	湖北省武汉市洪山区	洪山区疾病预防控制中心			2012-05-15 10	继发	病原学阴性		吴杰	2012-05-15	新患者	初治		2012-05-15							治疗	湖北省武汉市洪山区	洪山区关山街华中科技大学医院		完成疗程
		239	普通病案	湖北省武汉市汉阳区	武汉市汉阳区结核病防治所	湖北省武汉市汉阳区	武汉市汉阳区结核病防治所	420105012-2012-00140	239	15	女性	汉族	学生	本县区	420105005		转诊	2012-04-01	2012-04-09	8	阴性	2012-04-12	湖北省武汉市汉阳区	武汉市汉阳区结核病防治所	湖北省武汉市汉阳区	武汉市汉阳区结核病防治所			2012-05-16 12	继发	病原学阳性		朱建	2012-05-16	新患者	初治	2012-06-12	2012-05-16							治疗	湖北省武汉市汉阳区	汉阳区鹦鹉街社区卫生服务中心		治愈
		240	普通病案	湖北省武汉市蔡甸区	武汉市蔡甸区疾病预防控制中心	湖北省武汉市蔡甸区	武汉市蔡甸区疾病预防控制中心	420114003-2012-00140	240	20	女性	汉族	学生	本县区	420114200		直接就诊	2012-05-09	2012-05-18	9			湖北省武汉市蔡甸区	武汉市蔡甸区疾病预防控制中心	湖北省武汉市蔡甸区	武汉市蔡甸区疾病预防控制中心			2012-05-18 16	继发	病原学阴性		刘晓燕	2012-05-18	新患者	初治		2012-05-18							治疗	湖北省武汉市蔡甸区	武汉市蔡甸区消泗乡卫生院		完成疗程
		241	普通病案	湖北省武汉市青山区	青山区结核病防治所	湖北省武汉市青山区	青山区结核病防治所	420107018-2012-00133	241	19	女性	藏族	学生	本市其它县区	420107005		转诊	2012-04-19	2012-04-26	7	阴性	2012-05-18	湖北省武汉市青山区	青山区结核病防治所	湖北省武汉市青山区	青山区结核病防治所			2012-05-18 08	继发	病原学阴性		郑和平	2012-05-18	新患者	初治		2012-05-18							治疗	湖北省武汉市青山区	青山区结核病防治所		完成疗程
		242	普通病案	湖北省武汉市青山区	青山区结核病防治所	湖北省武汉市青山区	青山区结核病防治所	420107018-2012-00137	242	18	女性	藏族	学生	本市其它县区	420107005		转诊	2012-03-28	2012-04-05	8	阴性	2012-05-18	湖北省武汉市青山区	青山区结核病防治所	湖北省武汉市青山区	青山区结核病防治所			2012-05-18 08	继发	病原学阴性		郑和平	2012-05-18	新患者	初治		2012-05-18							治疗	湖北省武汉市青山区	青山区结核病防治所		完成疗程
		243	普通病案	湖北省武汉市洪山区	洪山区疾病预防控制中心	湖北省武汉市洪山区	洪山区疾病预防控制中心	420111016-2012-00277	243	23	女性	汉族	学生	本县区	420111002		转诊	2012-05-09	2012-05-16	7	阴性	2012-05-18	湖北省武汉市洪山区	洪山区疾病预防控制中心	湖北省武汉市洪山区	洪山区疾病预防控制中心			2012-05-18 09	继发	病原学阴性		李仁惠	2012-05-18	新患者	初治		2012-05-18							治疗	湖北省武汉市洪山区	洪山区疾病预防控制中心		完成疗程
		244	普通病案	湖北省武汉市洪山区	洪山区疾病预防控制中心	湖北省武汉市洪山区	洪山区疾病预防控制中心	420111016-2012-00278	244	24	男性	汉族	学生	本县区	420111002		转诊	2012-05-10	2012-05-16	6	阴性	2012-05-18	湖北省武汉市洪山区	洪山区疾病预防控制中心	湖北省武汉市洪山区	洪山区疾病预防控制中心			2012-05-18 09	继发	病原学阴性		吴杰	2012-05-18	新患者	初治		2012-05-18							治疗	湖北省武汉市洪山区	洪山区关山街华中科技大学医院		完成疗程
		245	普通病案	湖北省武汉市江夏区	武汉市江夏区疾病预防控制中心	湖北省武汉市江夏区	武汉市江夏区疾病预防控制中心	420115008-2012-00257	245	22	女性	汉族	学生	本县区	420115010		追踪	2012-04-22	2012-05-20	28	阴性	2012-05-20	湖北省武汉市江夏区	武汉市江夏区疾病预防控制中心	湖北省武汉市江夏区	武汉市江夏区疾病预防控制中心			2012-05-21 15	继发	病原学阴性		艾医生	2012-05-21	新患者	初治		2012-05-21							治疗	湖北省武汉市江夏区	武汉市江夏区五里界社区卫生服务中心		完成疗程
		246	普通病案	湖北省武汉市硚口区	武汉市结核病防治所	湖北省武汉市硚口区	武汉市结核病防治所	420104019-2012-00230	246	15	女性	汉族	学生	本县区	420104009		转诊	2012-05-15	2012-05-19	4	阴性	2012-05-22	湖北省武汉市硚口区	武汉市结核病防治所	湖北省武汉市硚口区	武汉市结核病防治所			2012-05-20 15	继发	病原学阴性		李春清	2012-05-21	新患者	初治		2012-05-21							治疗	湖北省武汉市硚口区	武汉市结核病防治所		完成疗程
		247	普通病案	湖北省武汉市武昌区	武昌区疾病预防控制中心	湖北省武汉市武昌区	武昌区疾病预防控制中心	420106010-2012-00259	247	18	男性	汉族	学生	本县区	420106013		直接就诊	2012-05-16	2012-05-22	6	阴性	2012-05-22	湖北省武汉市武昌区	武昌区疾病预防控制中心	湖北省武汉市武昌区	武昌区疾病预防控制中心			2012-05-22 09	继发	病原学阴性		刘文	2012-05-22	新患者	初治		2012-05-22							治疗				完成疗程
		248	普通病案	湖北省武汉市武昌区	武昌区疾病预防控制中心	湖北省武汉市武昌区	武昌区疾病预防控制中心	420106010-2012-00272	248	20	男性	汉族	学生	本县区	420106012		直接就诊	2012-05-19	2012-05-22	3	阴性	2012-05-22	湖北省武汉市武昌区	武昌区疾病预防控制中心	湖北省武汉市武昌区	武昌区疾病预防控制中心			2012-05-22 10	继发	病原学阴性		刘文	2012-05-22	新患者	初治		2012-05-22							治疗				完成疗程
		249	普通病案	湖北省武汉市洪山区	洪山区疾病预防控制中心	湖北省武汉市洪山区	洪山区疾病预防控制中心	420111016-2012-00283	249	24	男性	汉族	学生	本县区	420111002		转诊	2012-05-11	2012-05-21	10	阴性	2012-05-22	湖北省武汉市洪山区	洪山区疾病预防控制中心	湖北省武汉市洪山区	洪山区疾病预防控制中心			2012-05-22 10	继发	病原学阴性		吴杰	2012-05-22	新患者	初治		2012-05-22							治疗	湖北省武汉市洪山区	洪山区疾病预防控制中心		完成疗程
		250	普通病案	湖北省武汉市青山区	青山区结核病防治所	湖北省武汉市青山区	青山区结核病防治所	420107018-2012-00139	250	22	男性	汉族	学生	本县区	420107001		转诊	2012-05-09	2012-05-10	1			湖北省武汉市青山区	青山区结核病防治所	湖北省武汉市青山区	青山区结核病防治所			2012-05-23 14	继发	病原学阴性		郑和平	2012-05-23	新患者	初治		2012-05-23							治疗	湖北省武汉市青山区	青山区结核病防治所		丢失
		251	普通病案	湖北省武汉市东西湖区	东西湖区结核病防治所	湖北省武汉市东西湖区	东西湖区结核病防治所	420112019-2012-00093	251	23	男性	汉族	学生	本县区	420112400		直接就诊	2012-05-17	2012-05-23	6			湖北省武汉市东西湖区	东西湖区结核病防治所	湖北省武汉市东西湖区	东西湖区结核病防治所			2012-05-23 16	继发	病原学阴性		孟刚	2012-05-23	新患者	初治		2012-05-23							治疗	湖北省武汉市东西湖区	常青花园社区卫生服务中心		完成疗程
		252	普通病案	湖北省武汉市洪山区	洪山区疾病预防控制中心	湖北省武汉市洪山区	洪山区疾病预防控制中心	420111016-2012-00286	252	22	女性	汉族	学生	本县区	420111002		转诊	2012-05-08	2012-05-22	14	阴性	2012-05-23	湖北省武汉市洪山区	洪山区疾病预防控制中心	湖北省武汉市洪山区	洪山区疾病预防控制中心			2012-05-23 10	继发	病原学阴性		李仁惠	2012-05-23	新患者	初治		2012-05-23							治疗	湖北省武汉市洪山区	中国地质大学医院		完成疗程
		253	普通病案	湖北省武汉市洪山区	洪山区疾病预防控制中心	湖北省武汉市洪山区	洪山区疾病预防控制中心	420111016-2012-00287	253	21	男性	汉族	学生	本县区	420111001		转诊	2012-05-16	2012-05-22	6	阴性	2012-05-23	湖北省武汉市洪山区	洪山区疾病预防控制中心	湖北省武汉市洪山区	洪山区疾病预防控制中心			2012-05-23 10	继发	病原学阴性		李仁惠	2012-05-23	新患者	初治		2012-05-23							治疗	湖北省武汉市洪山区	洪山区珞南街理工大社区卫生服务中心		完成疗程
		254	普通病案	湖北省武汉市青山区	青山区结核病防治所	湖北省武汉市青山区	青山区结核病防治所	420107018-2012-00143	254	21	男性	汉族	学生	本县区	420107001		转诊	2012-03-30	2012-05-23	54	阴性	2012-05-23	湖北省武汉市青山区	青山区结核病防治所	湖北省武汉市青山区	青山区结核病防治所			2012-05-24 15	继发	病原学阴性		郑和平	2012-05-24	新患者	初治		2012-05-24							治疗	湖北省武汉市青山区	青山区结核病防治所		完成疗程
		255	普通病案	湖北省武汉市蔡甸区	武汉市蔡甸区疾病预防控制中心	湖北省武汉市蔡甸区	武汉市蔡甸区疾病预防控制中心	420114003-2012-00143	255	17	男性	汉族	学生	本县区	420114006		直接就诊	2012-05-18	2012-05-25	7			湖北省武汉市蔡甸区	武汉市蔡甸区疾病预防控制中心	湖北省武汉市蔡甸区	武汉市蔡甸区疾病预防控制中心			2012-05-25 15	继发	病原学阴性		刘晓燕	2012-05-25	新患者	初治		2012-05-25							治疗	湖北省武汉市蔡甸区	武汉市蔡甸区张湾街卫生院		完成疗程
		256	普通病案	湖北省武汉市洪山区	洪山区疾病预防控制中心	湖北省武汉市洪山区	洪山区疾病预防控制中心	420111016-2012-00292	256	24	男性	汉族	学生	本县区	420111002		转诊	2012-04-04	2012-05-14	40	阴性	2012-05-25	湖北省武汉市洪山区	洪山区疾病预防控制中心	湖北省武汉市洪山区	洪山区疾病预防控制中心			2012-05-25 10	继发	病原学阴性		吴杰	2012-05-25	新患者	初治		2012-05-25							治疗	湖北省武汉市洪山区	洪山区疾病预防控制中心		完成疗程
		257	普通病案	湖北省武汉市洪山区	洪山区疾病预防控制中心	湖北省武汉市洪山区	洪山区疾病预防控制中心	420111016-2012-00298	257	23	男性	汉族	学生	本县区	420111002		转诊	2012-05-22	2012-05-23	1	阴性	2012-05-25	湖北省武汉市洪山区	洪山区疾病预防控制中心	湖北省武汉市洪山区	洪山区疾病预防控制中心			2012-05-25 10	继发	病原学阴性		吴杰	2012-05-25	新患者	初治		2012-05-25							治疗	湖北省武汉市洪山区	洪山区疾病预防控制中心		完成疗程
		258	普通病案	湖北省武汉市江岸区	江岸区疾病预防控制中心	湖北省武汉市江岸区	江岸区疾病预防控制中心	420102000-2012-00207	258	15	女性	汉族	学生	本县区	420102010		转诊	2012-05-12	2012-05-12	0	阴性	2012-05-12	湖北省武汉市江岸区	江岸区疾病预防控制中心	湖北省武汉市江岸区	江岸区疾病预防控制中心			2012-05-28 10	继发	病原学阴性		陈国玺	2012-05-28	新患者	初治		2012-05-28							治疗	湖北省武汉市江岸区	江岸区二七街社区卫生服务中心		完成疗程
		259	普通病案	湖北省武汉市江汉区	武汉市江汉区疾病预防控制中心	湖北省武汉市江汉区	武汉市江汉区疾病预防控制中心	420103013-2012-00161	259	18	女性	汉族	学生	本县区	420103012		追踪	2012-05-20	2012-05-25	5	阴性	2012-05-26	湖北省武汉市江汉区	武汉市江汉区疾病预防控制中心	湖北省武汉市江汉区	武汉市江汉区疾病预防控制中心			2012-05-29 14	继发	病原学阳性		张伟	2012-05-29	新患者	初治		2012-05-29							治疗	湖北省武汉市江汉区	江汉区常青街社区卫生服务中心		治愈
		260	普通病案	湖北省武汉市东西湖区	东西湖区结核病防治所	湖北省武汉市东西湖区	东西湖区结核病防治所	420112019-2012-00101	260	15	男性	汉族	学生	本县区	420112014		追踪	2012-04-20	2012-05-29	39	阴性	2012-05-29	湖北省武汉市东西湖区	东西湖区结核病防治所	湖北省武汉市东西湖区	东西湖区结核病防治所			2012-05-29 14	继发	病原学阴性		孟刚	2012-05-29	新患者	初治		2012-05-29							治疗	湖北省武汉市东西湖区	东西湖区金银湖街卫生院		完成疗程
		261	普通病案	湖北省武汉市洪山区	洪山区疾病预防控制中心	湖北省武汉市洪山区	洪山区疾病预防控制中心	420111016-2012-00303	261	24	女性	汉族	学生	本县区	420111002		转诊	2012-04-29	2012-05-25	26	阴性	2012-05-29	湖北省武汉市洪山区	洪山区疾病预防控制中心	湖北省武汉市洪山区	洪山区疾病预防控制中心			2012-05-29 14	继发	病原学阴性		吴杰	2012-05-29	新患者	初治		2012-05-29							治疗	湖北省武汉市洪山区	洪山区关山街华中科技大学医院		完成疗程
		262	普通病案	湖北省武汉市洪山区	洪山区疾病预防控制中心	湖北省武汉市洪山区	洪山区疾病预防控制中心	420111016-2012-00302	262	22	男性	汉族	学生	本县区	420111002		转诊	2012-05-20	2012-05-24	4	阴性	2012-05-29	湖北省武汉市洪山区	洪山区疾病预防控制中心	湖北省武汉市洪山区	洪山区疾病预防控制中心			2012-05-29 16	继发	病原学阴性		李仁惠	2012-05-29	新患者	初治		2012-05-29							治疗	湖北省武汉市洪山区	洪山区关山街华中科技大学医院		完成疗程
		263	普通病案	湖北省武汉市蔡甸区	武汉市蔡甸区疾病预防控制中心	湖北省武汉市蔡甸区	武汉市蔡甸区疾病预防控制中心	420114003-2012-00157	263	17	男性	汉族	学生	本县区	420114004		直接就诊	2012-05-13	2012-05-30	17			湖北省武汉市蔡甸区	武汉市蔡甸区疾病预防控制中心	湖北省武汉市蔡甸区	武汉市蔡甸区疾病预防控制中心			2012-05-30 16	血行播散	病原学阳性		刘晓燕	2012-05-30	新患者	初治		2012-05-30							治疗	湖北省武汉市蔡甸区	武汉市蔡甸区侏儒街卫生院		治愈
		264	普通病案	湖北省武汉市江岸区	江岸区疾病预防控制中心	湖北省武汉市江岸区	江岸区疾病预防控制中心	420102000-2012-00221	264	16	男性	汉族	学生	本市其它县区	420102009		转诊	2012-05-01	2012-05-22	21	阴性	2012-05-22	湖北省武汉市江岸区	江岸区疾病预防控制中心	湖北省武汉市江岸区	江岸区疾病预防控制中心			2012-06-01 16	继发	病原学阴性		赵丽	2012-06-01	新患者	初治		2012-06-01							治疗	湖北省武汉市江岸区	江岸区劳动街社区卫生服务中心		完成疗程
		265	普通病案	湖北省武汉市青山区	青山区结核病防治所	湖北省武汉市青山区	青山区结核病防治所	420107018-2012-00146	265	18	女性	汉族	学生	本市其它县区	420107005		转诊	2012-05-24	2012-05-25	1			湖北省武汉市青山区	青山区结核病防治所	湖北省武汉市青山区	青山区结核病防治所			2012-06-01 15	继发	病原学阴性		郑和平	2012-06-01	新患者	初治		2012-06-01							治疗	湖北省武汉市青山区	青山区结核病防治所		完成疗程
		266	普通病案	湖北省武汉市洪山区	洪山区疾病预防控制中心	湖北省武汉市洪山区	洪山区疾病预防控制中心	420111016-2012-00307	266	22	男性	汉族	学生	本县区	420111001		转诊	2012-05-20	2012-05-28	8	阴性	2012-06-01	湖北省武汉市洪山区	洪山区疾病预防控制中心	湖北省武汉市洪山区	洪山区疾病预防控制中心			2012-06-01 09	继发	病原学阴性		吴杰	2012-06-01	新患者	初治		2012-06-01							治疗	湖北省武汉市洪山区	武汉市洪山区中医医院		完成疗程
		267	普通病案	湖北省武汉市洪山区	洪山区疾病预防控制中心	湖北省武汉市洪山区	洪山区疾病预防控制中心	420111016-2012-00308	267	22	男性	汉族	学生	本县区	420111002		转诊	2012-05-19	2012-05-29	10	阴性	2012-06-01	湖北省武汉市洪山区	洪山区疾病预防控制中心	湖北省武汉市洪山区	洪山区疾病预防控制中心			2012-06-01 09	继发	病原学阳性		李仁惠	2012-06-01	新患者	初治		2012-06-01							治疗	湖北省武汉市洪山区	洪山区疾病预防控制中心		治愈
		268	普通病案	湖北省武汉市黄陂区	武汉市黄陂区疾病预防控制中心	湖北省武汉市黄陂区	武汉市黄陂区疾病预防控制中心	420116003-2012-00364	268	17	男性	汉族	学生	本市其它县区	420116012		转诊	2012-05-30	2012-06-01	2			湖北省武汉市黄陂区	武汉市黄陂区疾病预防控制中心	湖北省武汉市黄陂区	武汉市黄陂区疾病预防控制中心			2012-06-04 10	继发	病原学阴性		吴汉先	2012-06-04	新患者	初治		2012-06-04							治疗	湖北省武汉市黄陂区	武汉市黄陂区姚家集街道卫生院		完成疗程
		269	普通病案	湖北省武汉市江岸区	江岸区疾病预防控制中心	湖北省武汉市江岸区	江岸区疾病预防控制中心	420102000-2012-00228	269	17	女性	汉族	学生	本市其它县区	420102015		转诊	2012-05-25	2012-06-05	11	阴性	2012-04-18	湖北省武汉市江岸区	江岸区疾病预防控制中心	湖北省武汉市江岸区	江岸区疾病预防控制中心			2012-06-05 10	继发	病原学阳性		杜娟	2012-06-05	新患者	初治		2012-06-05							治疗	湖北省武汉市江岸区	江岸区花桥街第二社区卫生服务中心		治愈
		270	普通病案	湖北省武汉市江岸区	江岸区疾病预防控制中心	湖北省武汉市江岸区	江岸区疾病预防控制中心	420102000-2012-00227	270	16	女性	汉族	学生	本市其它县区	420102014		转诊	2012-05-14	2012-05-16	2	阴性	2012-05-16	湖北省武汉市江岸区	江岸区疾病预防控制中心	湖北省武汉市江岸区	江岸区疾病预防控制中心			2012-06-05 08	继发	病原学阴性		张军	2012-06-05	新患者	初治		2012-06-05							治疗	湖北省武汉市江岸区	江岸区台北街社区卫生服务中心		完成疗程
		271	普通病案	湖北省武汉市东西湖区	东西湖区结核病防治所	湖北省武汉市东西湖区	东西湖区结核病防治所	420112019-2012-00105	271	17	男性	汉族	学生	本县区	420112001		直接就诊	2012-05-06	2012-06-06	31			湖北省武汉市东西湖区	东西湖区结核病防治所	湖北省武汉市东西湖区	东西湖区结核病防治所			2012-06-06 15	继发	病原学阴性		孟刚	2012-06-06	新患者	初治		2012-06-06							治疗	湖北省武汉市东西湖区	东西湖区吴家山街社区卫生服务中心		完成疗程
		272	普通病案	湖北省武汉市洪山区	洪山区疾病预防控制中心	湖北省武汉市洪山区	洪山区疾病预防控制中心	420111016-2012-00317	272	15	男性	汉族	学生	本县区	420111007		转诊	2012-03-25	2012-06-06	73	阴性	2012-06-06	湖北省武汉市洪山区	洪山区疾病预防控制中心	湖北省武汉市洪山区	洪山区疾病预防控制中心			2012-06-06 08	继发	病原学阴性		李仁惠	2012-06-06	新患者	初治		2012-06-06							治疗	湖北省武汉市洪山区	洪山区洪山街社区卫生服务中心		完成疗程
		273	普通病案	湖北省武汉市洪山区	洪山区疾病预防控制中心	湖北省武汉市洪山区	洪山区疾病预防控制中心	420111016-2012-00312	273	24	女性	汉族	学生	本县区	420111002		转诊	2012-02-05	2012-06-01	117	阴性	2012-06-06	湖北省武汉市洪山区	洪山区疾病预防控制中心	湖北省武汉市洪山区	洪山区疾病预防控制中心			2012-06-06 16	继发	病原学阴性		李仁惠	2012-06-06	新患者	初治		2012-06-06							治疗	湖北省武汉市洪山区	洪山区疾病预防控制中心		完成疗程
		274	普通病案	湖北省武汉市洪山区	洪山区疾病预防控制中心	湖北省武汉市洪山区	洪山区疾病预防控制中心	420111016-2012-00314	274	20	男性	汉族	学生	本县区	420111003		转诊	2012-05-21	2012-06-01	11	阴性	2012-06-06	湖北省武汉市洪山区	洪山区疾病预防控制中心	湖北省武汉市洪山区	洪山区疾病预防控制中心			2012-06-06 10	继发	病原学阴性		吴杰	2012-06-06	新患者	初治		2012-06-06							治疗	湖北省武汉市洪山区	湖北工业大学医院		完成疗程
		275	普通病案	湖北省武汉市黄陂区	武汉市黄陂区疾病预防控制中心	湖北省武汉市黄陂区	武汉市黄陂区疾病预防控制中心	420116003-2012-00374	275	14	男性	汉族	学生	本县区	420116009		直接就诊	2012-06-02	2012-06-06	4			湖北省武汉市黄陂区	武汉市黄陂区疾病预防控制中心	湖北省武汉市黄陂区	武汉市黄陂区疾病预防控制中心			2012-06-07 15	结核性胸膜炎	结核性胸膜炎		阮爱华	2012-06-07	新患者	初治		2012-06-07							治疗	湖北省武汉市黄陂区	武汉市黄陂区王家河街道卫生院		完成疗程
		276	普通病案	湖北省武汉市江汉区	武汉市江汉区疾病预防控制中心	湖北省武汉市江汉区	武汉市江汉区疾病预防控制中心	420103013-2012-00169	276	14	男性	汉族	学生	本县区	420103006		追踪	2012-05-17	2012-05-22	5	阴性	2012-05-22	湖北省武汉市江汉区	武汉市江汉区疾病预防控制中心	湖北省武汉市江汉区	武汉市江汉区疾病预防控制中心			2012-06-07 08	继发	病原学阴性		张宗琪	2012-06-07	新患者	初治		2012-06-07							治疗	湖北省武汉市江汉区	江汉区民意街社区卫生服务中心		完成疗程
		277	普通病案	湖北省武汉市江夏区	武汉市江夏区疾病预防控制中心	湖北省武汉市江夏区	武汉市江夏区疾病预防控制中心	420115008-2012-00301	277	20	男性	汉族	学生	本县区	420115405		转诊	2012-05-01	2012-06-06	36	阴性	2012-06-06	湖北省武汉市江夏区	武汉市江夏区疾病预防控制中心	湖北省武汉市江夏区	武汉市江夏区疾病预防控制中心			2012-06-07 15	继发	病原学阴性		熊医生	2012-06-07	新患者	初治		2012-06-07							治疗	湖北省武汉市江夏区	武汉市江夏区纸坊社区卫生服务中心		完成疗程
		278	普通病案	湖北省武汉市江夏区	武汉市江夏区疾病预防控制中心	湖北省武汉市江夏区	武汉市江夏区疾病预防控制中心	420115008-2012-00305	278	11	男性	汉族	学生	本县区	420115001		追踪	2012-05-16	2012-06-10	25			湖北省武汉市江夏区	武汉市江夏区疾病预防控制中心	湖北省武汉市江夏区	武汉市江夏区疾病预防控制中心			2012-06-11 15	继发	病原学阴性		熊医生	2012-06-11	新患者	初治		2012-06-11							治疗	湖北省武汉市江夏区	武汉市江夏区纸坊社区卫生服务中心		完成疗程
		279	普通病案	湖北省武汉市洪山区	洪山区疾病预防控制中心	湖北省武汉市洪山区	洪山区疾病预防控制中心	420111016-2012-00326	279	22	女性	汉族	学生	本县区	420111006		转诊	2012-05-22	2012-06-08	17	阴性	2012-06-11	湖北省武汉市洪山区	洪山区疾病预防控制中心	湖北省武汉市洪山区	洪山区疾病预防控制中心			2012-06-11 14	继发	病原学阴性		吴杰	2012-06-11	新患者	初治		2012-06-11							治疗	湖北省武汉市洪山区	洪山区疾病预防控制中心		完成疗程
		280	普通病案	湖北省武汉市洪山区	洪山区疾病预防控制中心	湖北省武汉市洪山区	洪山区疾病预防控制中心	420111016-2012-00329	280	19	男性	汉族	学生	本县区	420111002		转诊	2012-05-19	2012-06-08	20			湖北省武汉市洪山区	洪山区疾病预防控制中心	湖北省武汉市洪山区	洪山区疾病预防控制中心			2012-06-11 10	继发	病原学阴性		吴杰	2012-06-11	新患者	初治		2012-06-11							治疗	湖北省武汉市洪山区	洪山区关山街华中科技大学医院		完成疗程
		281	普通病案	湖北省武汉市洪山区	洪山区疾病预防控制中心	湖北省武汉市洪山区	洪山区疾病预防控制中心	420111016-2012-00320	281	19	女性	汉族	学生	本县区	420111003		转诊	2012-04-10	2012-06-09	60	阴性	2012-06-11	湖北省武汉市洪山区	洪山区疾病预防控制中心	湖北省武汉市洪山区	洪山区疾病预防控制中心			2012-06-11 09	继发	病原学阴性		吴杰	2012-06-11	新患者	初治		2012-06-11							治疗	湖北省武汉市洪山区	洪山区狮子山街华中农业大学医院		完成疗程
		282	普通病案	湖北省武汉市洪山区	洪山区疾病预防控制中心	湖北省武汉市洪山区	洪山区疾病预防控制中心	420111016-2012-00322	282	18	女性	汉族	学生	本县区	420111002		转诊	2012-02-20	2012-06-09	110	阴性	2012-06-11	湖北省武汉市洪山区	洪山区疾病预防控制中心	湖北省武汉市洪山区	洪山区疾病预防控制中心			2012-06-11 14	继发	病原学阴性		吴杰	2012-06-11	新患者	初治		2012-06-11							治疗	湖北省武汉市洪山区	武汉市第三医院光谷院区		完成疗程
		283	普通病案	湖北省武汉市洪山区	洪山区疾病预防控制中心	湖北省武汉市洪山区	洪山区疾病预防控制中心	420111016-2012-00327	283	24	男性	汉族	学生	本县区	420111006		转诊	2012-04-10	2012-06-08	59	阴性	2012-06-11	湖北省武汉市洪山区	洪山区疾病预防控制中心	湖北省武汉市洪山区	洪山区疾病预防控制中心			2012-06-11 08	继发	病原学阴性		李仁惠	2012-06-11	新患者	初治		2012-06-11							治疗	湖北省武汉市洪山区	洪山区疾病预防控制中心		完成疗程
		284	普通病案	湖北省武汉市洪山区	洪山区疾病预防控制中心	湖北省武汉市洪山区	洪山区疾病预防控制中心	420111016-2012-00330	284	19	女性	汉族	学生	本县区	420111002		转诊	2012-04-15	2012-04-25	10	阴性	2012-06-11	湖北省武汉市洪山区	洪山区疾病预防控制中心	湖北省武汉市洪山区	洪山区疾病预防控制中心			2012-06-11 16	继发	病原学阴性		吴杰	2012-06-11	新患者	初治		2012-06-11							治疗	湖北省武汉市洪山区	中国地质大学医院		完成疗程
		285	普通病案	湖北省武汉市洪山区	洪山区疾病预防控制中心	湖北省武汉市洪山区	洪山区疾病预防控制中心	420111016-2012-00325	285	22	男性	汉族	学生	本县区	420111006		转诊	2012-06-06	2012-06-08	2	阴性	2012-06-11	湖北省武汉市洪山区	洪山区疾病预防控制中心	湖北省武汉市洪山区	洪山区疾病预防控制中心			2012-06-11 15	继发	病原学阴性		李仁惠	2012-06-11	新患者	初治		2012-06-11							治疗	湖北省武汉市洪山区	洪山区疾病预防控制中心		完成疗程
		286	普通病案	湖北省武汉市黄陂区	武汉市黄陂区疾病预防控制中心	湖北省武汉市黄陂区	武汉市黄陂区疾病预防控制中心	420116003-2012-00389	286	24	男性	汉族	学生	本县区	420116011		直接就诊	2012-06-08	2012-06-12	4			湖北省武汉市黄陂区	武汉市黄陂区疾病预防控制中心	湖北省武汉市黄陂区	武汉市黄陂区疾病预防控制中心			2012-06-12 15	继发	病原学阴性		阮爱华	2012-06-12	新患者	初治		2012-06-12							治疗	湖北省武汉市黄陂区	武汉市黄陂区李家集街道中心卫生院		完成疗程
		287	普通病案	湖北省武汉市硚口区	武汉市结核病防治所	湖北省武汉市硚口区	武汉市结核病防治所	420104019-2012-00265	287	16	男性	汉族	学生	本县区	420104005		转诊	2012-05-27	2012-06-13	17	阴性	2012-06-15	湖北省武汉市硚口区	武汉市结核病防治所	湖北省武汉市硚口区	武汉市结核病防治所			2012-06-14 08	继发	病原学阴性		张秀华	2012-06-14	新患者	初治		2012-06-14							治疗	湖北省武汉市硚口区	武汉市结核病防治所		完成疗程
		288	普通病案	湖北省武汉市洪山区	洪山区疾病预防控制中心	湖北省武汉市洪山区	洪山区疾病预防控制中心	420111016-2012-00333	288	17	男性	汉族	学生	本县区	420111006		转诊	2012-06-06	2012-06-11	5	阴性	2012-06-14	湖北省武汉市洪山区	洪山区疾病预防控制中心	湖北省武汉市洪山区	洪山区疾病预防控制中心			2012-06-14 09	继发	病原学阴性		李仁惠	2012-06-14	新患者	初治		2012-06-14							治疗	湖北省武汉市洪山区	洪山区疾病预防控制中心		完成疗程
		289	普通病案	湖北省武汉市硚口区	武汉市结核病防治所	湖北省武汉市硚口区	武汉市结核病防治所	420104019-2012-00268	289	21	男性	汉族	学生	本县区	420104003		转诊	2012-05-30	2012-06-14	15	阴性	2012-06-16	湖北省武汉市硚口区	武汉市结核病防治所	湖北省武汉市硚口区	武汉市结核病防治所			2012-06-15 08	继发	病原学阴性		李春清	2012-06-15	新患者	初治		2012-06-15							治疗	湖北省武汉市硚口区	武汉市结核病防治所		完成疗程
		290	普通病案	湖北省武汉市汉南区	武汉市汉南区疾病预防控制中心	湖北省武汉市汉南区	武汉市汉南区疾病预防控制中心	420113006-2012-00313	290	18	女性	汉族	学生	本县区	420113096		追踪	2012-05-06	2012-06-01	26	阴性	2012-05-13	湖北省武汉市汉南区	武汉市汉南区疾病预防控制中心	湖北省武汉市汉南区	武汉市汉南区疾病预防控制中心			2012-06-16 09	继发	病原学阴性		张伟	2012-06-16	新患者	初治		2012-06-16							治疗	湖北省武汉市汉南区	武汉市汉南区疾病预防控制中心		完成疗程
		291	普通病案	湖北省武汉市江岸区	江岸区疾病预防控制中心	湖北省武汉市江岸区	江岸区疾病预防控制中心	420102000-2012-00243	291	10	女性	汉族	学生	本市其它县区	420102012		追踪	2012-06-12	2012-06-18	6			湖北省武汉市江岸区	江岸区疾病预防控制中心	湖北省武汉市江岸区	江岸区疾病预防控制中心			2012-06-18 08	继发	病原学阴性		王艳秋	2012-06-18	新患者	初治		2012-06-18							治疗	湖北省武汉市江岸区	江岸区丹水池街社区卫生服务中心		完成疗程
		292	普通病案	湖北省武汉市汉阳区	武汉市汉阳区结核病防治所	湖北省武汉市汉阳区	武汉市汉阳区结核病防治所	420105012-2012-00164	292	13	男性	汉族	学生	本县区	420105007		转诊	2012-05-23	2012-05-30	7	阴性	2012-06-02	湖北省武汉市汉阳区	武汉市汉阳区结核病防治所	湖北省武汉市汉阳区	武汉市汉阳区结核病防治所			2012-06-18 15	继发	病原学阴性		王长武	2012-06-18	新患者	初治	2012-08-02	2012-06-18							治疗	湖北省武汉市汉阳区	汉阳区五里街社区卫生服务中心		完成疗程
		293	普通病案	湖北省武汉市汉阳区	武汉市汉阳区结核病防治所	湖北省武汉市汉阳区	武汉市汉阳区结核病防治所	420105012-2012-00169	293	15	男性	汉族	学生	本县区	420105008		转诊	2012-05-24	2012-05-31	7	阴性	2012-06-04	湖北省武汉市汉阳区	武汉市汉阳区结核病防治所	湖北省武汉市汉阳区	武汉市汉阳区结核病防治所			2012-06-18 15	继发	病原学阳性		朱建	2012-06-18	新患者	初治	2012-08-02	2012-06-18							治疗	湖北省武汉市汉阳区	武汉市汉阳区二桥街社区卫生服务中心		治愈
		294	普通病案	湖北省武汉市汉阳区	武汉市汉阳区结核病防治所	湖北省武汉市汉阳区	武汉市汉阳区结核病防治所	420105012-2012-00171	294	18	女性	汉族	学生	本县区	420105010		转诊	2012-05-17	2012-05-27	10	阴性	2012-05-30	湖北省武汉市汉阳区	武汉市汉阳区结核病防治所	湖北省武汉市汉阳区	武汉市汉阳区结核病防治所			2012-06-18 15	继发	病原学阳性		王长武	2012-06-18	新患者	初治	2012-07-30	2012-06-18							治疗	湖北省武汉市汉阳区	汉阳区永丰街社区卫生服务中心		治愈
		295	普通病案	湖北省武汉市洪山区	洪山区疾病预防控制中心	湖北省武汉市洪山区	洪山区疾病预防控制中心	420111016-2012-00335	295	23	男性	汉族	学生	本县区	420111003		转诊	2012-05-03	2012-06-05	33	阴性	2012-06-18	湖北省武汉市洪山区	洪山区疾病预防控制中心	湖北省武汉市洪山区	洪山区疾病预防控制中心			2012-06-18 09	继发	病原学阴性		李仁惠	2012-06-18	新患者	初治	2012-06-18	2012-06-18							治疗	湖北省武汉市洪山区	洪山区狮子山街华中农业大学医院		完成疗程
		296	普通病案	湖北省武汉市洪山区	洪山区疾病预防控制中心	湖北省武汉市洪山区	洪山区疾病预防控制中心	420111016-2012-00336	296	22	男性	汉族	学生	本县区	420111003		转诊	2012-05-23	2012-06-11	19			湖北省武汉市洪山区	洪山区疾病预防控制中心	湖北省武汉市洪山区	洪山区疾病预防控制中心			2012-06-19 08	继发	病原学阴性		吴杰	2012-06-19	新患者	初治		2012-06-19							治疗	湖北省武汉市洪山区	洪山区狮子山街华中农业大学医院		完成疗程
		297	普通病案	湖北省武汉市洪山区	洪山区疾病预防控制中心	湖北省武汉市洪山区	洪山区疾病预防控制中心	420111016-2012-00339	297	16	男性	汉族	学生	本县区	420111005		追踪	2012-03-24	2012-06-06	74			湖北省武汉市洪山区	洪山区疾病预防控制中心	湖北省武汉市洪山区	洪山区疾病预防控制中心			2012-06-19 09	继发	病原学阴性		吴杰	2012-06-19	新患者	初治		2012-06-19							治疗	湖北省武汉市洪山区	洪山区洪山街社区卫生服务中心		完成疗程
		298	普通病案	湖北省武汉市江汉区	武汉市江汉区疾病预防控制中心	湖北省武汉市江汉区	武汉市江汉区疾病预防控制中心	420103013-2012-00189	298	18	女性	汉族	学生	本县区	420103008		转诊	2012-06-04	2012-06-11	7	阴性	2012-06-11	湖北省武汉市江汉区	武汉市江汉区疾病预防控制中心	湖北省武汉市江汉区	武汉市江汉区疾病预防控制中心			2012-06-20 09	继发	病原学阴性		刘艳丽	2012-06-20	新患者	初治		2012-06-20							治疗	湖北省武汉市江汉区	江汉区万松街社区卫生服务中心		完成疗程
		299	普通病案	湖北省武汉市汉阳区	武汉市汉阳区结核病防治所	湖北省武汉市汉阳区	武汉市汉阳区结核病防治所	420105012-2012-00173	299	23	男性	汉族	学生	本县区	420105004		直接就诊	2012-06-03	2012-06-05	2	阴性	2012-06-06	湖北省武汉市汉阳区	武汉市汉阳区结核病防治所	湖北省武汉市汉阳区	武汉市汉阳区结核病防治所			2012-06-21 10	继发	病原学阴性		朱建	2012-06-21	新患者	初治	2012-08-20	2012-06-21							治疗	湖北省武汉市汉阳区	汉阳区晴川街社区卫生服务中心		完成疗程
		300	普通病案	湖北省武汉市江夏区	武汉市江夏区疾病预防控制中心	湖北省武汉市江夏区	武汉市江夏区疾病预防控制中心	420115008-2012-00329	300	22	男性	汉族	学生	本市其它县区	420115001		追踪	2012-06-06	2012-06-20	14	阴性	2012-06-20	湖北省武汉市江夏区	武汉市江夏区疾病预防控制中心	湖北省武汉市江夏区	武汉市江夏区疾病预防控制中心			2012-06-21 15	继发	病原学阳性		艾医生	2012-06-21	新患者	初治		2012-06-21							治疗	湖北省武汉市江夏区	武汉市江夏区五里界社区卫生服务中心		治愈
		301	普通病案	湖北省武汉市青山区	青山区结核病防治所	湖北省武汉市青山区	青山区结核病防治所	420107018-2012-00168	301	23	男性	汉族	学生	本市其它县区	420107001		转诊	2012-05-01	2012-05-19	18	阴性	2012-06-21	湖北省武汉市青山区	青山区结核病防治所	湖北省武汉市青山区	青山区结核病防治所			2012-06-21 08	继发	病原学阳性		郑和平	2012-06-21	新患者	初治		2012-06-21							治疗	湖北省武汉市青山区	青山区结核病防治所		治愈
		302	普通病案	湖北省武汉市洪山区	洪山区疾病预防控制中心	湖北省武汉市洪山区	洪山区疾病预防控制中心	420111016-2012-00347	302	23	女性	汉族	学生	本县区	420111002		转诊	2012-06-09	2012-06-20	11	阴性	2012-06-21	湖北省武汉市洪山区	洪山区疾病预防控制中心	湖北省武汉市洪山区	洪山区疾病预防控制中心			2012-06-21 10	继发	病原学阴性		李仁惠	2012-06-21	新患者	初治		2012-06-21							治疗	湖北省武汉市洪山区	中国地质大学医院		完成疗程
		303	普通病案	湖北省武汉市洪山区	洪山区疾病预防控制中心	湖北省武汉市洪山区	洪山区疾病预防控制中心	420111016-2012-00344	303	23	女性	汉族	学生	本县区	420111002		转诊	2012-06-09	2012-06-19	10	阴性	2012-06-21	湖北省武汉市洪山区	洪山区疾病预防控制中心	湖北省武汉市洪山区	洪山区疾病预防控制中心			2012-06-21 10	继发	病原学阴性		李仁惠	2012-06-21	新患者	初治		2012-06-21							治疗	湖北省武汉市洪山区	洪山区疾病预防控制中心		完成疗程
		304	普通病案	湖北省武汉市江夏区	武汉市江夏区疾病预防控制中心	湖北省武汉市江夏区	武汉市江夏区疾病预防控制中心	420115008-2012-00333	304	20	女性	汉族	学生	本市其它县区	420115010		追踪	2012-05-25	2012-06-24	30	阴性	2012-06-24	湖北省武汉市江夏区	武汉市江夏区疾病预防控制中心	湖北省武汉市江夏区	武汉市江夏区疾病预防控制中心			2012-06-25 09	继发	病原学阴性		熊医生	2012-06-25	新患者	初治		2012-06-25							治疗	湖北省武汉市江夏区	藏龙岛经院社区卫生服务中心		完成疗程
		305	普通病案	湖北省武汉市武昌区	武昌区疾病预防控制中心	湖北省武汉市武昌区	武昌区疾病预防控制中心	420106010-2012-00339	305	17	男性	汉族	学生	本市其它县区	420106002		转诊	2012-06-01	2012-06-08	7	阴性	2012-06-26	湖北省武汉市武昌区	武昌区疾病预防控制中心	湖北省武汉市武昌区	武昌区疾病预防控制中心			2012-06-26 08	继发	病原学阴性		刘文	2012-06-26	新患者	初治		2012-06-26							治疗				完成疗程
		306	普通病案	湖北省武汉市武昌区	武昌区疾病预防控制中心	湖北省武汉市武昌区	武昌区疾病预防控制中心	420106010-2012-00344	306	22	男性	汉族	学生	本市其它县区	420106003		追踪	2012-03-06	2012-03-10	4	阴性	2012-06-26	湖北省武汉市武昌区	武昌区疾病预防控制中心	湖北省武汉市武昌区	武昌区疾病预防控制中心			2012-06-26 08	继发	病原学阴性		刘文	2012-06-26	新患者	初治		2012-06-26							治疗				完成疗程
		307	普通病案	湖北省武汉市东西湖区	东西湖区结核病防治所	湖北省武汉市东西湖区	东西湖区结核病防治所	420112019-2012-00118	307	23	女性	汉族	学生	本县区	420112400		追踪	2012-05-15	2012-05-29	14	阴性	2012-06-26	湖北省武汉市东西湖区	东西湖区结核病防治所	湖北省武汉市东西湖区	东西湖区结核病防治所			2012-06-26 15	继发	病原学阴性		胡才生	2012-06-26	新患者	初治		2012-06-26							治疗	湖北省武汉市东西湖区	常青花园社区卫生服务中心		完成疗程
		308	普通病案	湖北省武汉市硚口区	武汉市结核病防治所	湖北省武汉市硚口区	武汉市结核病防治所	420104019-2012-00292	308	14	男性	汉族	学生	本县区	420104009		转诊	2012-06-09	2012-06-25	16	阴性	2012-06-27	湖北省武汉市硚口区	武汉市结核病防治所	湖北省武汉市硚口区	武汉市结核病防治所			2012-06-26 10	继发	病原学阴性		张秀华	2012-06-26	新患者	初治		2012-06-26							治疗	湖北省武汉市硚口区	武汉市结核病防治所		完成疗程
		309	普通病案	湖北省武汉市洪山区	洪山区疾病预防控制中心	湖北省武汉市洪山区	洪山区疾病预防控制中心	420111016-2012-00354	309	21	男性	汉族	学生	本县区	420111006		转诊	2012-06-12	2012-06-25	13	阴性	2012-06-26	湖北省武汉市洪山区	洪山区疾病预防控制中心	湖北省武汉市洪山区	洪山区疾病预防控制中心			2012-06-26 09	继发	病原学阴性		李仁惠	2012-06-26	新患者	初治		2012-06-26							治疗	湖北省武汉市洪山区	洪山区疾病预防控制中心		完成疗程
		310	普通病案	湖北省武汉市洪山区	洪山区疾病预防控制中心	湖北省武汉市洪山区	洪山区疾病预防控制中心	420111016-2012-00352	310	21	男性	汉族	学生	本县区	420111002		转诊	2012-06-18	2012-06-25	7	阴性	2012-06-26	湖北省武汉市洪山区	洪山区疾病预防控制中心	湖北省武汉市洪山区	洪山区疾病预防控制中心			2012-06-26 09	继发	病原学阴性		李仁惠	2012-06-26	新患者	初治		2012-06-26							治疗	湖北省武汉市洪山区	洪山区关山街华中科技大学医院		完成疗程
		311	普通病案	湖北省武汉市洪山区	洪山区疾病预防控制中心	湖北省武汉市洪山区	洪山区疾病预防控制中心	420111016-2012-00353	311	24	男性	汉族	学生	本县区	420111002		转诊	2012-06-21	2012-06-25	4	阴性	2012-06-26	湖北省武汉市洪山区	洪山区疾病预防控制中心	湖北省武汉市洪山区	洪山区疾病预防控制中心			2012-06-26 09	继发	病原学阴性		吴杰	2012-06-26	新患者	初治		2012-06-26							治疗	湖北省武汉市洪山区	洪山区疾病预防控制中心		完成疗程
		312	普通病案	湖北省武汉市洪山区	洪山区疾病预防控制中心	湖北省武汉市洪山区	洪山区疾病预防控制中心	420111016-2012-00349	312	22	男性	汉族	学生	本县区	420111002		转诊	2012-06-02	2012-06-25	23	阴性	2012-06-26	湖北省武汉市洪山区	洪山区疾病预防控制中心	湖北省武汉市洪山区	洪山区疾病预防控制中心			2012-06-26 08	继发	病原学阳性		李仁惠	2012-06-26	新患者	初治		2012-06-26							治疗	湖北省武汉市洪山区	洪山区关山街华中科技大学医院		治愈
		313	普通病案	湖北省武汉市江汉区	武汉市江汉区疾病预防控制中心	湖北省武汉市江汉区	武汉市江汉区疾病预防控制中心	420103013-2012-00196	313	17	女性	汉族	学生	本县区	420103011		转诊	2012-06-04	2012-06-04	0	阴性	2012-06-08	湖北省武汉市江汉区	武汉市江汉区疾病预防控制中心	湖北省武汉市江汉区	武汉市江汉区疾病预防控制中心			2012-06-27 09	继发	病原学阴性		赵丽	2012-06-27	新患者	初治		2012-06-27							治疗	湖北省武汉市江汉区	江汉区前进街社区卫生服务中心		完成疗程
		314	普通病案	湖北省武汉市蔡甸区	武汉市蔡甸区疾病预防控制中心	湖北省武汉市蔡甸区	武汉市蔡甸区疾病预防控制中心	420114003-2012-00184	314	11	女性	汉族	学生	其他省	420114004		转诊	2012-06-12	2012-06-27	15	阴性	2012-06-27	湖北省武汉市蔡甸区	武汉市蔡甸区疾病预防控制中心	湖北省武汉市蔡甸区	武汉市蔡甸区疾病预防控制中心			2012-06-27 15	继发	病原学阴性		刘晓燕	2012-06-27	新患者	初治		2012-06-27							治疗	湖北省武汉市蔡甸区	武汉市蔡甸区侏儒街卫生院		完成疗程
		315	普通病案	湖北省武汉市洪山区	洪山区疾病预防控制中心	湖北省武汉市洪山区	洪山区疾病预防控制中心	420111016-2012-00359	315	22	男性	汉族	学生	本县区	420111002		转诊	2012-05-16	2012-06-26	41	阴性	2012-06-27	湖北省武汉市洪山区	洪山区疾病预防控制中心	湖北省武汉市洪山区	洪山区疾病预防控制中心			2012-06-27 08	继发	病原学阴性		李仁惠	2012-06-27	新患者	初治		2012-06-27							治疗	湖北省武汉市洪山区	洪山区疾病预防控制中心		完成疗程
		316	普通病案	湖北省武汉市洪山区	洪山区疾病预防控制中心	湖北省武汉市洪山区	洪山区疾病预防控制中心	420111016-2012-00358	316	18	男性	汉族	学生	本县区	420111001		转诊	2012-06-10	2012-06-26	16	阴性	2012-06-27	湖北省武汉市洪山区	洪山区疾病预防控制中心	湖北省武汉市洪山区	洪山区疾病预防控制中心			2012-06-27 08	继发	病原学阴性		吴杰	2012-06-27	新患者	初治		2012-06-27							治疗	湖北省武汉市洪山区	武汉市洪山区中医医院		完成疗程
		317	普通病案	湖北省武汉市洪山区	洪山区疾病预防控制中心	湖北省武汉市洪山区	洪山区疾病预防控制中心	420111016-2012-00360	317	21	男性	汉族	学生	本县区	420111001		转诊	2012-06-12	2012-06-26	14	阴性	2012-06-27	湖北省武汉市洪山区	洪山区疾病预防控制中心	湖北省武汉市洪山区	洪山区疾病预防控制中心			2012-06-27 08	继发	病原学阴性		李仁惠	2012-06-27	新患者	初治		2012-06-27							治疗	湖北省武汉市洪山区	武汉市洪山区中医医院		完成疗程
		318	普通病案	湖北省武汉市洪山区	洪山区疾病预防控制中心	湖北省武汉市洪山区	洪山区疾病预防控制中心	420111016-2012-00363	318	22	女性	汉族	学生	本县区	420111002		转诊	2012-06-08	2012-06-27	19	阴性	2012-06-29	湖北省武汉市洪山区	洪山区疾病预防控制中心	湖北省武汉市洪山区	洪山区疾病预防控制中心			2012-06-29 09	继发	病原学阴性		李仁惠	2012-06-29	新患者	初治		2012-06-29							治疗	湖北省武汉市洪山区	武汉市第三医院光谷院区		完成疗程
		319	普通病案	湖北省武汉市新洲区	新洲区疾病预防控制中心	湖北省武汉市新洲区	新洲区疾病预防控制中心	420117002-2012-00400	319	9	男性	汉族	学生	本县区	420117001		转诊	2012-05-10	2012-07-02	53	阴性	2012-07-02	湖北省武汉市新洲区	新洲区疾病预防控制中心	湖北省武汉市新洲区	新洲区疾病预防控制中心			2012-07-02 08	继发	病原学阴性		马莉	2012-07-02	新患者	初治		2012-07-02							治疗	湖北省武汉市新洲区	新洲区邾城街卫生院		完成疗程
		320	普通病案	湖北省武汉市洪山区	洪山区疾病预防控制中心	湖北省武汉市洪山区	洪山区疾病预防控制中心	420111016-2012-00369	320	23	男性	汉族	学生	本县区	420111002		转诊	2012-06-16	2012-07-01	15	阴性	2012-07-04	湖北省武汉市洪山区	洪山区疾病预防控制中心	湖北省武汉市洪山区	洪山区疾病预防控制中心			2012-07-04 15	继发	病原学阴性		李仁惠	2012-07-04	新患者	初治		2012-07-04							治疗	湖北省武汉市洪山区	武汉市洪山区中医医院		完成疗程
		321	普通病案	湖北省武汉市洪山区	洪山区疾病预防控制中心	湖北省武汉市洪山区	洪山区疾病预防控制中心	420111016-2012-00373	321	20	男性	汉族	学生	本县区	420111002		转诊	2012-06-19	2012-07-04	15	阴性	2012-07-04	湖北省武汉市洪山区	洪山区疾病预防控制中心	湖北省武汉市洪山区	洪山区疾病预防控制中心			2012-07-04 08	继发	病原学阴性		李仁惠	2012-07-04	新患者	初治		2012-07-04							治疗	湖北省武汉市洪山区	洪山区珞南街理工大社区卫生服务中心		完成疗程
		322	普通病案	湖北省武汉市洪山区	洪山区疾病预防控制中心	湖北省武汉市洪山区	洪山区疾病预防控制中心	420111016-2012-00370	322	21	男性	汉族	学生	本县区	420111001		转诊	2012-06-27	2012-07-04	7	阴性	2012-07-04	湖北省武汉市洪山区	洪山区疾病预防控制中心	湖北省武汉市洪山区	洪山区疾病预防控制中心			2012-07-04 08	继发	病原学阴性		李仁惠	2012-07-04	新患者	初治		2012-07-04							治疗	湖北省武汉市洪山区	武汉市洪山区中医医院		完成疗程
		323	普通病案	湖北省武汉市洪山区	洪山区疾病预防控制中心	湖北省武汉市洪山区	洪山区疾病预防控制中心	420111016-2012-00366	323	23	男性	汉族	学生	本县区	420111002		转诊	2012-06-15	2012-06-29	14	阴性	2012-07-04	湖北省武汉市洪山区	洪山区疾病预防控制中心	湖北省武汉市洪山区	洪山区疾病预防控制中心			2012-07-04 15	继发	病原学阴性		吴杰	2012-07-04	新患者	初治		2012-07-04							治疗	湖北省武汉市洪山区	洪山区关山街华中科技大学医院		完成疗程
		324	普通病案	湖北省武汉市洪山区	洪山区疾病预防控制中心	湖北省武汉市洪山区	洪山区疾病预防控制中心	420111016-2012-00372	324	19	男性	汉族	学生	本县区	420111001		转诊	2012-06-14	2012-07-04	20	阴性	2012-07-04	湖北省武汉市洪山区	洪山区疾病预防控制中心	湖北省武汉市洪山区	洪山区疾病预防控制中心			2012-07-04 08	继发	病原学阴性		李仁惠	2012-07-04	新患者	初治		2012-07-04							治疗	湖北省武汉市洪山区	洪山区疾病预防控制中心		完成疗程
		325	普通病案	湖北省武汉市黄陂区	武汉市黄陂区疾病预防控制中心	湖北省武汉市黄陂区	武汉市黄陂区疾病预防控制中心	420116003-2012-00484	325	13	男性	汉族	学生	本县区	420116002		直接就诊	2012-07-01	2012-07-05	4			湖北省武汉市黄陂区	武汉市黄陂区疾病预防控制中心	湖北省武汉市黄陂区	武汉市黄陂区疾病预防控制中心			2012-07-05 16	继发	病原学阴性		蔡逸民	2012-07-05	新患者	初治		2012-07-05							治疗	湖北省武汉市黄陂区	武汉市黄陂区祁家湾街道卫生院		完成疗程
		326	普通病案	湖北省武汉市江夏区	武汉市江夏区疾病预防控制中心	湖北省武汉市江夏区	武汉市江夏区疾病预防控制中心	420115008-2012-00356	326	17	男性	汉族	学生	本县区	420115001		转诊	2012-03-02	2012-07-05	125	阴性	2012-07-05	湖北省武汉市江夏区	武汉市江夏区疾病预防控制中心	湖北省武汉市江夏区	武汉市江夏区疾病预防控制中心			2012-07-06 14	继发	病原学阴性		胡医生	2012-07-06	新患者	初治		2012-07-06							治疗	湖北省武汉市江夏区	武汉市江夏区纸坊社区卫生服务中心		完成疗程
		327	普通病案	湖北省武汉市江汉区	武汉市江汉区疾病预防控制中心	湖北省武汉市江汉区	武汉市江汉区疾病预防控制中心	420103013-2012-00214	327	17	男性	汉族	学生	本县区	420103008		追踪	2012-06-25	2012-06-29	4	阴性	2012-06-29	湖北省武汉市江汉区	武汉市江汉区疾病预防控制中心	湖北省武汉市江汉区	武汉市江汉区疾病预防控制中心			2012-07-09 14	继发	病原学阴性		孙学智	2012-07-09	新患者	初治		2012-07-09							治疗	湖北省武汉市江汉区	江汉区北湖街社区卫生服务中心		完成疗程
		328	普通病案	湖北省武汉市武昌区	武昌区疾病预防控制中心	湖北省武汉市武昌区	武昌区疾病预防控制中心	420106010-2012-00365	328	22	男性	汉族	学生	本县区	420106010		直接就诊	2012-07-04	2012-07-10	6	阴性	2012-07-10	湖北省武汉市武昌区	武昌区疾病预防控制中心	湖北省武汉市武昌区	武昌区疾病预防控制中心			2012-07-10 09	继发	病原学阳性		刘文	2012-07-10	新患者	初治		2012-07-10							治疗				治愈
		329	普通病案	湖北省武汉市新洲区	新洲区疾病预防控制中心	湖北省武汉市新洲区	新洲区疾病预防控制中心	420117002-2012-00425	329	18	男性	汉族	学生	本县区	420117002		转诊	2012-07-06	2012-07-13	7	阴性	2012-07-13	湖北省武汉市新洲区	新洲区疾病预防控制中心	湖北省武汉市新洲区	新洲区疾病预防控制中心			2012-07-13 09	继发	病原学阴性		马莉	2012-07-13	新患者	初治		2012-07-13							治疗	湖北省武汉市新洲区	新洲区阳逻街卫生院		完成疗程
		330	普通病案	湖北省武汉市青山区	青山区结核病防治所	湖北省武汉市青山区	青山区结核病防治所	420107018-2012-00181	330	18	男性	汉族	学生	本县区	420107008		转诊	2012-06-29	2012-06-29	0			湖北省武汉市青山区	青山区结核病防治所	湖北省武汉市青山区	青山区结核病防治所			2012-07-13 09	继发	病原学阴性		郑和平	2012-07-13	新患者	初治		2012-07-13							治疗	湖北省武汉市青山区	青山区结核病防治所		完成疗程
		331	普通病案	湖北省武汉市硚口区	武汉市结核病防治所	湖北省武汉市硚口区	武汉市结核病防治所	420104019-2012-00326	331	23	男性	汉族	学生	本县区	420104012		转诊	2012-06-15	2012-07-12	27	阴性	2012-07-14	湖北省武汉市硚口区	武汉市结核病防治所	湖北省武汉市硚口区	武汉市结核病防治所			2012-07-13 09	继发	病原学阴性		李春清	2012-07-13	新患者	初治		2012-07-13							治疗	湖北省武汉市硚口区	武汉市结核病防治所		完成疗程
		332	普通病案	湖北省武汉市洪山区	洪山区疾病预防控制中心	湖北省武汉市洪山区	洪山区疾病预防控制中心	420111016-2012-00384	332	21	男性	汉族	学生	本县区	420111002		转诊	2012-07-10	2012-07-12	2	阴性	2012-07-13	湖北省武汉市洪山区	洪山区疾病预防控制中心	湖北省武汉市洪山区	洪山区疾病预防控制中心			2012-07-13 09	继发	病原学阴性		李仁惠	2012-07-13	新患者	初治		2012-07-13							治疗	湖北省武汉市洪山区	武汉市第三医院光谷院区		完成疗程
		333	普通病案	湖北省武汉市蔡甸区	武汉市蔡甸区疾病预防控制中心	湖北省武汉市蔡甸区	武汉市蔡甸区疾病预防控制中心	420114003-2012-00214	333	18	男性	汉族	学生	本县区	420114003		直接就诊	2012-07-06	2012-07-16	10			湖北省武汉市蔡甸区	武汉市蔡甸区疾病预防控制中心	湖北省武汉市蔡甸区	武汉市蔡甸区疾病预防控制中心			2012-07-16 15	继发	病原学阴性		刘晓燕	2012-07-16	新患者	初治		2012-07-16							治疗	湖北省武汉市蔡甸区	武汉市蔡甸区永安街卫生院		完成疗程
		334	普通病案	湖北省武汉市东西湖区	东西湖区结核病防治所	湖北省武汉市东西湖区	东西湖区结核病防治所	420112019-2012-00129	334	17	男性	汉族	学生	本县区	420112008		直接就诊	2012-07-11	2012-07-16	5			湖北省武汉市东西湖区	东西湖区结核病防治所	湖北省武汉市东西湖区	东西湖区结核病防治所			2012-07-16 11	继发	病原学阳性		孟刚	2012-07-16	新患者	初治		2012-07-16							治疗	湖北省武汉市东西湖区	东西湖区长青街卫生院		治愈
		335	普通病案	湖北省武汉市武昌区	武昌区疾病预防控制中心	湖北省武汉市武昌区	武昌区疾病预防控制中心	420106010-2012-00388	335	20	男性	汉族	学生	本县区	420106008		转诊	2012-02-10	2012-07-13	154	阴性	2012-07-17	湖北省武汉市武昌区	武昌区疾病预防控制中心	湖北省武汉市武昌区	武昌区疾病预防控制中心			2012-07-17 08	继发	病原学阴性		刘文	2012-07-17	新患者	初治		2012-07-17							治疗				完成疗程
		336	普通病案	湖北省武汉市武昌区	武昌区疾病预防控制中心	湖北省武汉市武昌区	武昌区疾病预防控制中心	420106010-2012-00378	336	25	男性	汉族	学生	本市其它县区	420106008		转诊	2012-03-25	2012-04-09	15	阴性	2012-07-17	湖北省武汉市武昌区	武昌区疾病预防控制中心	湖北省武汉市武昌区	武昌区疾病预防控制中心			2012-07-17 08	继发	病原学阴性		刘文	2012-07-17	新患者	初治		2012-07-17							治疗				完成疗程
		337	普通病案	湖北省武汉市汉阳区	武汉市汉阳区结核病防治所	湖北省武汉市汉阳区	武汉市汉阳区结核病防治所	420105012-2012-00197	337	21	女性	汉族	学生	本县区	420105009		转诊	2012-06-20	2012-06-25	5	阴性	2012-06-25	湖北省武汉市汉阳区	武汉市汉阳区结核病防治所	湖北省武汉市汉阳区	武汉市汉阳区结核病防治所			2012-07-17 08	继发	病原学阳性		周震	2012-07-17	新患者	初治	2012-08-24	2012-07-17							治疗	湖北省武汉市汉阳区	武汉市汉阳区二桥街社区卫生服务中心		治愈
		338	普通病案	湖北省武汉市黄陂区	武汉市黄陂区疾病预防控制中心	湖北省武汉市黄陂区	武汉市黄陂区疾病预防控制中心	420116003-2012-00513	338	22	男性	汉族	学生	本县区	420116004		直接就诊	2012-06-28	2012-07-16	18			湖北省武汉市黄陂区	武汉市黄陂区疾病预防控制中心	湖北省武汉市黄陂区	武汉市黄陂区疾病预防控制中心			2012-07-17 10	继发	病原学阴性		黄文	2012-07-17	新患者	初治		2012-07-17							治疗	湖北省武汉市黄陂区	武汉市黄陂区罗汉寺街卫生院		完成疗程
		339	普通病案	湖北省武汉市汉南区	武汉市汉南区疾病预防控制中心	湖北省武汉市汉南区	武汉市汉南区疾病预防控制中心	420113006-2012-00233	339	19	女性	汉族	学生	本县区	420113096		追踪	2012-03-02	2012-06-11	101	阴性	2012-06-11	湖北省武汉市汉南区	武汉市汉南区疾病预防控制中心	湖北省武汉市汉南区	武汉市汉南区疾病预防控制中心			2012-07-17 08	继发	病原学阴性		熊勤涛	2012-07-17	新患者	初治	2012-08-10	2012-07-17							治疗				完成疗程
		340	普通病案	湖北省武汉市黄陂区	武汉市黄陂区疾病预防控制中心	湖北省武汉市黄陂区	武汉市黄陂区疾病预防控制中心	420116003-2012-00531	340	21	女性	汉族	学生	本市其它县区	420116004		追踪	2012-06-16	2012-07-20	34			湖北省武汉市黄陂区	武汉市黄陂区疾病预防控制中心	湖北省武汉市黄陂区	武汉市黄陂区疾病预防控制中心			2012-07-23 10	继发	病原学阴性		蔡逸民	2012-07-23	新患者	初治		2012-07-23							治疗	湖北省武汉市黄陂区	武汉市黄陂区罗汉寺街卫生院		完成疗程
		341	普通病案	湖北省武汉市青山区	青山区结核病防治所	湖北省武汉市青山区	青山区结核病防治所	420107018-2012-00191	341	19	男性	汉族	学生	本县区	420107001		转诊	2012-07-13	2012-07-17	4			湖北省武汉市青山区	青山区结核病防治所	湖北省武汉市青山区	青山区结核病防治所			2012-07-23 08	继发	病原学阴性		郑和平	2012-07-23	新患者	初治		2012-07-23							治疗	湖北省武汉市青山区	青山区结核病防治所		丢失
		342	普通病案	湖北省武汉市洪山区	洪山区疾病预防控制中心	湖北省武汉市洪山区	洪山区疾病预防控制中心	420111016-2012-00393	342	20	女性	汉族	学生	本县区	420111006		转诊	2012-07-11	2012-07-21	10	阴性	2012-07-23	湖北省武汉市洪山区	洪山区疾病预防控制中心	湖北省武汉市洪山区	洪山区疾病预防控制中心			2012-07-23 09	继发	病原学阴性		李仁惠	2012-07-23	新患者	初治		2012-07-23							治疗	湖北省武汉市洪山区	洪山区疾病预防控制中心		完成疗程
		343	普通病案	湖北省武汉市武昌区	武昌区疾病预防控制中心	湖北省武汉市武昌区	武昌区疾病预防控制中心	420106010-2012-00401	343	22	男性	汉族	学生	本市其它县区	420106003		追踪	2012-04-05	2012-04-16	11	阴性	2012-07-24	湖北省武汉市武昌区	武昌区疾病预防控制中心	湖北省武汉市武昌区	武昌区疾病预防控制中心			2012-07-24 08	继发	病原学阴性		刘文	2012-07-24	新患者	初治		2012-07-24							治疗				完成疗程
		344	普通病案	湖北省武汉市武昌区	武昌区疾病预防控制中心	湖北省武汉市武昌区	武昌区疾病预防控制中心	420106010-2012-00402	344	19	男性	汉族	学生	本市其它县区	420106013		追踪	2012-04-02	2012-04-17	15	阴性	2012-07-24	湖北省武汉市武昌区	武昌区疾病预防控制中心	湖北省武汉市武昌区	武昌区疾病预防控制中心			2012-07-24 08	继发	病原学阴性		刘文	2012-07-24	新患者	初治		2012-07-24							治疗				完成疗程
		345	普通病案	湖北省武汉市武昌区	武昌区疾病预防控制中心	湖北省武汉市武昌区	武昌区疾病预防控制中心	420106010-2012-00405	345	22	女性	汉族	学生	本市其它县区	420106005		转诊	2012-05-01	2012-07-10	70	阴性	2012-07-24	湖北省武汉市武昌区	武昌区疾病预防控制中心	湖北省武汉市武昌区	武昌区疾病预防控制中心			2012-07-24 09	继发	病原学阳性		刘文	2012-07-24	新患者	初治		2012-07-24							治疗				治愈
		346	普通病案	湖北省武汉市汉阳区	武汉市汉阳区结核病防治所	湖北省武汉市汉阳区	武汉市汉阳区结核病防治所	420105012-2012-00214	346	17	男性	汉族	学生	本县区	420105008		转诊	2012-06-29	2012-07-16	17	阴性	2012-07-16	湖北省武汉市汉阳区	武汉市汉阳区结核病防治所	湖北省武汉市汉阳区	武汉市汉阳区结核病防治所			2012-07-24 10	继发	病原学阴性		王长武	2012-07-24	新患者	初治	2012-09-14	2012-07-24							治疗	湖北省武汉市汉阳区	汉阳区琴断口街社区卫生服务中心		完成疗程
		347	普通病案	湖北省武汉市黄陂区	武汉市黄陂区疾病预防控制中心	湖北省武汉市黄陂区	武汉市黄陂区疾病预防控制中心	420116003-2012-00534	347	17	男性	汉族	学生	本县区	420116996		直接就诊	2012-07-12	2012-07-23	11			湖北省武汉市黄陂区	武汉市黄陂区疾病预防控制中心	湖北省武汉市黄陂区	武汉市黄陂区疾病预防控制中心			2012-07-24 16	继发	病原学阴性		阮爱华	2012-07-24	新患者	初治		2012-07-24							治疗	湖北省武汉市黄陂区	武汉盘龙城经济开发区卫生院		完成疗程
		348	普通病案	湖北省武汉市洪山区	洪山区疾病预防控制中心	湖北省武汉市洪山区	洪山区疾病预防控制中心	420111016-2012-00398	348	19	男性	汉族	学生	本县区	420111004		转诊	2012-06-12	2012-07-23	41	阴性	2012-07-25	湖北省武汉市洪山区	洪山区疾病预防控制中心	湖北省武汉市洪山区	洪山区疾病预防控制中心			2012-07-25 12	继发	病原学阳性		李仁惠	2012-07-25	新患者	初治		2012-07-25							治疗	湖北省武汉市洪山区	武汉市洪山区张家湾街社区卫生中心		转入耐多药治疗
		349	普通病案	湖北省武汉市洪山区	洪山区疾病预防控制中心	湖北省武汉市洪山区	洪山区疾病预防控制中心	420111016-2012-00396	349	19	男性	汉族	学生	本县区	420111003		转诊	2012-07-08	2012-07-23	15	阴性	2012-07-25	湖北省武汉市洪山区	洪山区疾病预防控制中心	湖北省武汉市洪山区	洪山区疾病预防控制中心			2012-07-25 14	继发	病原学阴性		李仁惠	2012-07-25	新患者	初治		2012-07-25							治疗	湖北省武汉市洪山区	洪山区狮子山街华中农业大学医院		完成疗程
		350	普通病案	湖北省武汉市汉阳区	武汉市汉阳区结核病防治所	湖北省武汉市汉阳区	武汉市汉阳区结核病防治所	420105012-2012-00220	350	16	男性	汉族	学生	本县区	420105004		健康体检	2012-07-05	2012-07-23	18	阴性	2012-07-26	湖北省武汉市汉阳区	武汉市汉阳区结核病防治所	湖北省武汉市汉阳区	武汉市汉阳区结核病防治所			2012-07-27 09	继发	病原学阴性		朱建	2012-07-27	新患者	初治	2012-09-26	2012-07-27							治疗	湖北省武汉市汉阳区	汉阳区晴川街社区卫生服务中心		完成疗程
		351	普通病案	湖北省武汉市蔡甸区	武汉市蔡甸区疾病预防控制中心	湖北省武汉市蔡甸区	武汉市蔡甸区疾病预防控制中心	420114003-2012-00244	351	16	女性	汉族	学生	本市其它县区	420114007		转诊	2012-07-14	2012-07-27	13	阴性	2012-07-27	湖北省武汉市蔡甸区	武汉市蔡甸区疾病预防控制中心	湖北省武汉市蔡甸区	武汉市蔡甸区疾病预防控制中心			2012-07-27 16	继发	病原学阳性		刘晓燕	2012-07-27	新患者	初治		2012-07-27							治疗	湖北省武汉市蔡甸区	武汉市蔡甸区索河街卫生院		治愈
		352	普通病案	湖北省武汉市江岸区	江岸区疾病预防控制中心	湖北省武汉市江岸区	江岸区疾病预防控制中心	420102000-2012-00308	352	13	男性	汉族	学生	本市其它县区	420102012		转诊	2012-05-17	2012-07-17	61	阴性	2012-07-17	湖北省武汉市江岸区	江岸区疾病预防控制中心	湖北省武汉市江岸区	江岸区疾病预防控制中心			2012-07-30 09	血行播散	病原学阴性		杨澄清	2012-07-30	新患者	初治		2012-07-30							治疗	湖北省武汉市江岸区	江岸区丹水池街社区卫生服务中心		完成疗程
		353	普通病案	湖北省武汉市洪山区	洪山区疾病预防控制中心	湖北省武汉市洪山区	洪山区疾病预防控制中心	420111016-2012-00403	353	21	男性	汉族	学生	本县区	420111002		转诊	2012-07-06	2012-07-28	22	阴性	2012-07-30	湖北省武汉市洪山区	洪山区疾病预防控制中心	湖北省武汉市洪山区	洪山区疾病预防控制中心			2012-07-30 09	继发	病原学阴性		李仁惠	2012-07-30	新患者	初治		2012-07-30							治疗	湖北省武汉市洪山区	洪山区关山街华中科技大学医院		完成疗程
		354	普通病案	湖北省武汉市洪山区	洪山区疾病预防控制中心	湖北省武汉市洪山区	洪山区疾病预防控制中心	420111016-2012-00407	354	23	女性	汉族	学生	本县区	420111002		转诊	2012-05-02	2012-06-07	36	阴性	2012-07-30	湖北省武汉市洪山区	洪山区疾病预防控制中心	湖北省武汉市洪山区	洪山区疾病预防控制中心			2012-07-30 10	继发	病原学阴性		李仁惠	2012-07-30	新患者	初治		2012-07-30							治疗	湖北省武汉市洪山区	洪山区疾病预防控制中心		完成疗程
		355	普通病案	湖北省武汉市武昌区	武昌区疾病预防控制中心	湖北省武汉市武昌区	武昌区疾病预防控制中心	420106010-2012-00425	355	21	女性	汉族	学生	本县区	420106002		直接就诊	2012-07-26	2012-07-31	5	阴性	2012-07-31	湖北省武汉市武昌区	武昌区疾病预防控制中心	湖北省武汉市武昌区	武昌区疾病预防控制中心			2012-07-31 09	继发	病原学阴性		刘文	2012-07-31	新患者	初治		2012-07-31							治疗				完成疗程
		356	普通病案	湖北省武汉市武昌区	武昌区疾病预防控制中心	湖北省武汉市武昌区	武昌区疾病预防控制中心	420106010-2012-00421	356	22	女性	汉族	学生	本市其它县区	420106003		追踪	2012-04-19	2012-04-24	5	阴性	2012-07-31	湖北省武汉市武昌区	武昌区疾病预防控制中心	湖北省武汉市武昌区	武昌区疾病预防控制中心			2012-07-31 08	继发	病原学阴性		刘文	2012-07-31	新患者	初治		2012-07-31							治疗				完成疗程
		357	普通病案	湖北省武汉市武昌区	武昌区疾病预防控制中心	湖北省武汉市武昌区	武昌区疾病预防控制中心	420106010-2012-00416	357	16	男性	汉族	学生	本县区	420106011		直接就诊	2012-07-26	2012-07-31	5	阴性	2012-07-31	湖北省武汉市武昌区	武昌区疾病预防控制中心	湖北省武汉市武昌区	武昌区疾病预防控制中心			2012-07-31 08	继发	病原学阳性		刘文	2012-07-31	新患者	初治		2012-07-31							治疗				治愈
		358	普通病案	湖北省武汉市武昌区	武昌区疾病预防控制中心	湖北省武汉市武昌区	武昌区疾病预防控制中心	420106010-2012-00423	358	25	女性	汉族	学生	本市其它县区	420106002		追踪	2012-04-05	2012-04-26	21	阴性	2012-07-31	湖北省武汉市武昌区	武昌区疾病预防控制中心	湖北省武汉市武昌区	武昌区疾病预防控制中心			2012-07-31 08	继发	病原学阴性		刘文	2012-07-31	新患者	初治		2012-07-31							治疗				完成疗程
		359	普通病案	湖北省武汉市洪山区	洪山区疾病预防控制中心	湖北省武汉市洪山区	洪山区疾病预防控制中心	420111016-2012-00410	359	22	女性	汉族	学生	本县区	420111001		转诊	2012-07-19	2012-07-29	10	阴性	2012-08-01	湖北省武汉市洪山区	洪山区疾病预防控制中心	湖北省武汉市洪山区	洪山区疾病预防控制中心			2012-08-01 09	继发	病原学阴性		吴杰	2012-08-01	新患者	初治		2012-08-01							治疗	湖北省武汉市洪山区	武汉市洪山区中医医院		完成疗程
		360	普通病案	湖北省武汉市洪山区	洪山区疾病预防控制中心	湖北省武汉市洪山区	洪山区疾病预防控制中心	420111016-2012-00415	360	20	男性	汉族	学生	本县区	420111007		转诊	2012-07-10	2012-07-31	21	阴性	2012-08-02	湖北省武汉市洪山区	洪山区疾病预防控制中心	湖北省武汉市洪山区	洪山区疾病预防控制中心			2012-08-02 10	继发	病原学阴性		李仁惠	2012-08-02	新患者	初治		2012-08-02							治疗	湖北省武汉市洪山区	洪山区洪山街社区卫生服务中心		完成疗程
		361	普通病案	湖北省武汉市洪山区	洪山区疾病预防控制中心	湖北省武汉市洪山区	洪山区疾病预防控制中心	420111016-2012-00413	361	21	男性	汉族	学生	本县区	420111001		转诊	2012-07-29	2012-07-30	1	阴性	2012-08-02	湖北省武汉市洪山区	洪山区疾病预防控制中心	湖北省武汉市洪山区	洪山区疾病预防控制中心			2012-08-02 09	继发	病原学阴性		李仁惠	2012-08-02	新患者	初治		2012-08-02							治疗	湖北省武汉市洪山区	洪山区关山街邮电社区卫生服务中心		完成疗程
		362	普通病案	湖北省武汉市东湖高新技术开发区	武汉东湖新技术开发区佛祖岭社区卫生服务中心	湖北省武汉市东湖高新技术开发区	武汉东湖新技术开发区佛祖岭社区卫生服务中心	420192011-2012-01033	362	12	男性	汉族	学生	本市其它县区	420192002		追踪	2012-07-07	2012-08-03	27			湖北省武汉市东湖高新技术开发区	武汉东湖新技术开发区佛祖岭社区卫生服务中心	湖北省武汉市东湖高新技术开发区	武汉东湖新技术开发区佛祖岭社区卫生服务中心			2012-08-03 10	继发	病原学阴性		辛善志	2012-08-03	新患者	初治		2012-08-03							治疗	湖北省武汉市东湖高新技术开发区	武汉东湖新技术开发区佛祖岭社区卫生服务中心		完成疗程
		363	普通病案	湖北省武汉市黄陂区	武汉市黄陂区疾病预防控制中心	湖北省武汉市黄陂区	武汉市黄陂区疾病预防控制中心	420116003-2012-00569	363	21	女性	汉族	学生	本县区	420116013		直接就诊	2012-07-03	2012-08-04	32			湖北省武汉市黄陂区	武汉市黄陂区疾病预防控制中心	湖北省武汉市黄陂区	武汉市黄陂区疾病预防控制中心			2012-08-05 08	继发	病原学阴性		雷文斌	2012-08-05	新患者	初治		2012-08-05							治疗	湖北省武汉市黄陂区	武汉市黄陂区蔡家榨街道卫生院		完成疗程
		364	普通病案	湖北省武汉市蔡甸区	武汉市蔡甸区疾病预防控制中心	湖北省武汉市蔡甸区	武汉市蔡甸区疾病预防控制中心	420114003-2012-00268	364	22	女性	汉族	学生	本县区	420114002		转诊	2012-07-16	2012-08-06	21			湖北省武汉市蔡甸区	武汉市蔡甸区疾病预防控制中心	湖北省武汉市蔡甸区	武汉市蔡甸区疾病预防控制中心			2012-08-06 16	继发	病原学阴性		刘晓燕	2012-08-06	新患者	初治		2012-08-06							治疗	湖北省武汉市蔡甸区	武汉市蔡甸区奓山街卫生院		完成疗程
		365	普通病案	湖北省武汉市洪山区	洪山区疾病预防控制中心	湖北省武汉市洪山区	洪山区疾病预防控制中心	420111016-2012-00419	365	21	男性	汉族	学生	本县区	420111002		转诊	2012-06-30	2012-08-06	37	阴性	2012-08-09	湖北省武汉市洪山区	洪山区疾病预防控制中心	湖北省武汉市洪山区	洪山区疾病预防控制中心			2012-08-09 09	继发	病原学阴性		李仁惠	2012-08-09	新患者	初治		2012-08-09							治疗	湖北省武汉市洪山区	武汉市第三医院光谷院区		完成疗程
		366	普通病案	湖北省武汉市洪山区	洪山区疾病预防控制中心	湖北省武汉市洪山区	洪山区疾病预防控制中心	420111016-2012-00420	366	20	男性	汉族	学生	本县区	420111007		转诊	2012-06-14	2012-08-06	53	阴性	2012-08-09	湖北省武汉市洪山区	洪山区疾病预防控制中心	湖北省武汉市洪山区	洪山区疾病预防控制中心			2012-08-09 09	继发	病原学阴性		吴杰	2012-08-09	新患者	初治		2012-08-09							治疗	湖北省武汉市洪山区	洪山区洪山街社区卫生服务中心		完成疗程
		367	普通病案	湖北省武汉市洪山区	洪山区疾病预防控制中心	湖北省武汉市洪山区	洪山区疾病预防控制中心	420111016-2012-00430	367	20	男性	汉族	学生	本县区	420111003		转诊	2012-08-12	2012-08-13	1	阴性	2012-08-15	湖北省武汉市洪山区	洪山区疾病预防控制中心	湖北省武汉市洪山区	洪山区疾病预防控制中心			2012-08-15 11	继发	病原学阴性		李仁惠	2012-08-15	新患者	初治		2012-08-15							治疗	湖北省武汉市洪山区	湖北工业大学医院		完成疗程
		368	普通病案	湖北省武汉市洪山区	洪山区疾病预防控制中心	湖北省武汉市洪山区	洪山区疾病预防控制中心	420111016-2012-00428	368	24	男性	汉族	学生	本县区	420111002		转诊	2012-08-08	2012-08-10	2	阴性	2012-08-15	湖北省武汉市洪山区	洪山区疾病预防控制中心	湖北省武汉市洪山区	洪山区疾病预防控制中心			2012-08-15 09	继发	病原学阴性		吴杰	2012-08-15	新患者	初治		2012-08-15							治疗	湖北省武汉市洪山区	洪山区疾病预防控制中心		完成疗程
		369	普通病案	湖北省武汉市洪山区	洪山区疾病预防控制中心	湖北省武汉市洪山区	洪山区疾病预防控制中心	420111016-2012-00434	369	23	女性	汉族	学生	本县区	420111006		转诊	2012-08-05	2012-08-13	8	阴性	2012-08-15	湖北省武汉市洪山区	洪山区疾病预防控制中心	湖北省武汉市洪山区	洪山区疾病预防控制中心			2012-08-15 11	继发	病原学阴性		吴杰	2012-08-15	新患者	初治		2012-08-15							治疗	湖北省武汉市洪山区	洪山区疾病预防控制中心		完成疗程
		370	普通病案	湖北省武汉市洪山区	洪山区疾病预防控制中心	湖北省武汉市洪山区	洪山区疾病预防控制中心	420111016-2012-00433	370	20	男性	汉族	学生	本县区	420111002		转诊	2012-08-03	2012-08-13	10	阴性	2012-08-15	湖北省武汉市洪山区	洪山区疾病预防控制中心	湖北省武汉市洪山区	洪山区疾病预防控制中心			2012-08-15 11	继发	病原学阴性		李仁惠	2012-08-15	新患者	初治		2012-08-15							治疗	湖北省武汉市洪山区	洪山区关山街华中科技大学医院		完成疗程
		371	普通病案	湖北省武汉市洪山区	洪山区疾病预防控制中心	湖北省武汉市洪山区	洪山区疾病预防控制中心	420111016-2012-00432	371	20	男性	汉族	学生	本县区	420111003		转诊	2012-08-09	2012-08-14	5	阴性	2012-08-15	湖北省武汉市洪山区	洪山区疾病预防控制中心	湖北省武汉市洪山区	洪山区疾病预防控制中心			2012-08-15 11	继发	病原学阴性		吴杰	2012-08-15	新患者	初治		2012-08-15							治疗	湖北省武汉市洪山区	湖北工业大学医院		完成疗程
		372	普通病案	湖北省武汉市黄陂区	武汉市黄陂区疾病预防控制中心	湖北省武汉市黄陂区	武汉市黄陂区疾病预防控制中心	420116003-2012-00597	372	20	女性	汉族	学生	本县区	420116003		直接就诊	2012-08-11	2012-08-20	9			湖北省武汉市黄陂区	武汉市黄陂区疾病预防控制中心	湖北省武汉市黄陂区	武汉市黄陂区疾病预防控制中心			2012-08-20 15	继发	病原学阴性		蔡逸民	2012-08-20	新患者	初治		2012-08-20							治疗	湖北省武汉市黄陂区	武汉市黄陂区横店街道中心卫生院		完成疗程
		373	普通病案	湖北省武汉市蔡甸区	武汉市蔡甸区疾病预防控制中心	湖北省武汉市蔡甸区	武汉市蔡甸区疾病预防控制中心	420114003-2012-00285	373	19	男性	汉族	学生	本县区	420114007		直接就诊	2012-07-28	2012-08-20	23			湖北省武汉市蔡甸区	武汉市蔡甸区疾病预防控制中心	湖北省武汉市蔡甸区	武汉市蔡甸区疾病预防控制中心			2012-08-20 15	继发	病原学阴性		刘晓燕	2012-08-20	新患者	初治		2012-08-20							治疗	湖北省武汉市蔡甸区	武汉市蔡甸区索河街卫生院		完成疗程
		374	普通病案	湖北省武汉市硚口区	武汉市结核病防治所	湖北省武汉市硚口区	武汉市结核病防治所	420104019-2012-00375	374	14	女性	汉族	学生	本县区	420104012		直接就诊	2012-07-30	2012-08-19	20	阴性	2012-08-21	湖北省武汉市硚口区	武汉市结核病防治所	湖北省武汉市硚口区	武汉市结核病防治所			2012-08-20 10	继发	病原学阴性		李春清	2012-08-20	新患者	初治		2012-08-20							治疗	湖北省武汉市硚口区	武汉市结核病防治所		完成疗程
		375	普通病案	湖北省武汉市硚口区	武汉市结核病防治所	湖北省武汉市硚口区	武汉市结核病防治所	420104019-2012-00372	375	21	男性	汉族	学生	本县区	420104005		转诊	2012-08-01	2012-08-19	18			湖北省武汉市硚口区	武汉市结核病防治所	湖北省武汉市硚口区	武汉市结核病防治所			2012-08-20 08	继发	病原学阴性		张秀华	2012-08-20	新患者	初治		2012-08-20							治疗	湖北省武汉市硚口区	武汉市结核病防治所		完成疗程
		376	普通病案	湖北省武汉市洪山区	洪山区疾病预防控制中心	湖北省武汉市洪山区	洪山区疾病预防控制中心	420111016-2012-00441	376	22	女性	汉族	学生	本县区	420111006		转诊	2012-07-22	2012-08-20	29	阴性	2012-08-21	湖北省武汉市洪山区	洪山区疾病预防控制中心	湖北省武汉市洪山区	洪山区疾病预防控制中心			2012-08-21 10	继发	病原学阴性		李仁惠	2012-08-21	新患者	初治		2012-08-21							治疗	湖北省武汉市洪山区	洪山区疾病预防控制中心		完成疗程
		377	普通病案	湖北省武汉市洪山区	洪山区疾病预防控制中心	湖北省武汉市洪山区	洪山区疾病预防控制中心	420111016-2012-00443	377	24	男性	汉族	学生	本县区	420111002		转诊	2012-07-17	2012-08-18	32	阴性	2012-08-21	湖北省武汉市洪山区	洪山区疾病预防控制中心	湖北省武汉市洪山区	洪山区疾病预防控制中心			2012-08-21 11	继发	病原学阴性		李仁惠	2012-08-21	新患者	初治		2012-08-21							治疗	湖北省武汉市洪山区	洪山区关山街华中科技大学医院		完成疗程
		378	普通病案	湖北省武汉市洪山区	洪山区疾病预防控制中心	湖北省武汉市洪山区	洪山区疾病预防控制中心	420111016-2012-00439	378	22	男性	汉族	学生	本县区	420111001		转诊	2012-08-13	2012-08-20	7	阴性	2012-08-21	湖北省武汉市洪山区	洪山区疾病预防控制中心	湖北省武汉市洪山区	洪山区疾病预防控制中心			2012-08-21 09	继发	病原学阴性		李仁惠	2012-08-21	新患者	初治		2012-08-21							治疗	湖北省武汉市洪山区	洪山区珞南街理工大社区卫生服务中心		完成疗程
		379	普通病案	湖北省武汉市洪山区	洪山区疾病预防控制中心	湖北省武汉市洪山区	洪山区疾病预防控制中心	420111016-2012-00438	379	23	女性	汉族	学生	本县区	420111008		转诊	2012-04-01	2012-08-20	141	阴性	2012-08-21	湖北省武汉市洪山区	洪山区疾病预防控制中心	湖北省武汉市洪山区	洪山区疾病预防控制中心			2012-08-21 09	继发	病原学阴性		李仁惠	2012-08-21	新患者	初治		2012-08-21							治疗	湖北省武汉市洪山区	洪山区和平街社区卫生服务中心		完成疗程
		380	普通病案	湖北省武汉市黄陂区	武汉市黄陂区疾病预防控制中心	湖北省武汉市黄陂区	武汉市黄陂区疾病预防控制中心	420116003-2012-00608	380	19	男性	汉族	学生	本县区	420116010		直接就诊	2012-08-10	2012-08-21	11			湖北省武汉市黄陂区	武汉市黄陂区疾病预防控制中心	湖北省武汉市黄陂区	武汉市黄陂区疾病预防控制中心			2012-08-22 09	继发	病原学阴性		阮爱华	2012-08-22	新患者	初治		2012-08-22							治疗	湖北省武汉市黄陂区	武汉市黄陂区长轩岭街道中心卫生院		完成疗程
		381	普通病案	湖北省武汉市江岸区	江岸区疾病预防控制中心	湖北省武汉市江岸区	江岸区疾病预防控制中心	420102000-2012-00346	381	19	女性	汉族	学生	本市其它县区	420102003		追踪	2012-08-01	2012-08-23	22			湖北省武汉市江岸区	江岸区疾病预防控制中心	湖北省武汉市江岸区	江岸区疾病预防控制中心			2012-08-23 08	继发	病原学阳性		魏媛	2012-08-23	新患者	初治		2012-08-23							治疗	湖北省武汉市江岸区	江岸区花桥街第二社区卫生服务中心		治愈
		382	普通病案	湖北省武汉市洪山区	洪山区疾病预防控制中心	湖北省武汉市洪山区	洪山区疾病预防控制中心	420111016-2012-00447	382	21	女性	汉族	学生	本县区	420111001		转诊	2012-06-07	2012-06-17	10	阴性	2012-08-23	湖北省武汉市洪山区	洪山区疾病预防控制中心	湖北省武汉市洪山区	洪山区疾病预防控制中心			2012-08-23 14	继发	病原学阴性		吴杰	2012-08-23	新患者	初治		2012-08-23							治疗	湖北省武汉市洪山区	洪山区疾病预防控制中心		完成疗程
		383	普通病案	湖北省武汉市江汉区	武汉市江汉区疾病预防控制中心	湖北省武汉市江汉区	武汉市江汉区疾病预防控制中心	420103013-2012-00286	383	17	男性	汉族	学生	本县区	420103001		转诊	2012-08-17	2012-08-20	3			湖北省武汉市江汉区	武汉市江汉区疾病预防控制中心	湖北省武汉市江汉区	武汉市江汉区疾病预防控制中心			2012-08-24 09	继发	病原学阴性		文汉礼王小衔	2012-08-24	新患者	初治		2012-08-24							治疗	湖北省武汉市江汉区	江汉区民族街社区卫生服务中心		完成疗程
		384	普通病案	湖北省武汉市江岸区	江岸区疾病预防控制中心	湖北省武汉市江岸区	江岸区疾病预防控制中心	420102000-2012-00357	384	17	男性	汉族	学生	本市其它县区	420102012		转诊	2012-07-05	2012-08-03	29	阴性	2012-08-15	湖北省武汉市江岸区	江岸区疾病预防控制中心	湖北省武汉市江岸区	江岸区疾病预防控制中心			2012-08-27 09	继发	病原学阴性		杜娟	2012-08-27	新患者	初治		2012-08-27							治疗	湖北省武汉市江岸区	江岸区丹水池街社区卫生服务中心		完成疗程
		385	普通病案	湖北省武汉市东湖高新技术开发区	武汉东湖新技术开发区九峰街社区卫生服务中心	湖北省武汉市东湖高新技术开发区	武汉东湖新技术开发区九峰街社区卫生服务中心	420192005-2012-01015	385	17	女性	汉族	学生	本县区	420192005		转诊	2012-06-07	2012-07-08	31			湖北省武汉市东湖高新技术开发区	武汉东湖新技术开发区九峰街社区卫生服务中心	湖北省武汉市东湖高新技术开发区	武汉东湖新技术开发区九峰街社区卫生服务中心			2012-08-27 10	继发	病原学阳性		龚聪	2012-08-27	新患者	初治		2012-08-27							治疗				治愈
		386	普通病案	湖北省武汉市洪山区	洪山区疾病预防控制中心	湖北省武汉市洪山区	洪山区疾病预防控制中心	420111016-2012-00451	386	31	男性	汉族	学生	本县区	420111006		转诊	2012-08-20	2012-08-27	7	阴性	2012-08-27	湖北省武汉市洪山区	洪山区疾病预防控制中心	湖北省武汉市洪山区	洪山区疾病预防控制中心			2012-08-27 16	继发	病原学阴性		吴杰	2012-08-27	新患者	初治		2012-08-27							治疗	湖北省武汉市洪山区	洪山区疾病预防控制中心		完成疗程
		387	普通病案	湖北省武汉市洪山区	洪山区疾病预防控制中心	湖北省武汉市洪山区	洪山区疾病预防控制中心	420111016-2012-00448	387	21	女性	汉族	学生	本县区	420111002		转诊	2012-06-27	2012-07-02	5	阴性	2012-08-27	湖北省武汉市洪山区	洪山区疾病预防控制中心	湖北省武汉市洪山区	洪山区疾病预防控制中心			2012-08-27 09	继发	病原学阴性		吴杰	2012-08-27	新患者	初治		2012-08-27							治疗	湖北省武汉市洪山区	武汉市第三医院光谷院区		完成疗程
		388	普通病案	湖北省武汉市武昌区	武昌区疾病预防控制中心	湖北省武汉市武昌区	武昌区疾病预防控制中心	420106010-2012-00467	388	20	女性	汉族	学生	本县区	420106003		转诊	2012-08-13	2012-08-20	7	阴性	2012-08-28	湖北省武汉市武昌区	武昌区疾病预防控制中心	湖北省武汉市武昌区	武昌区疾病预防控制中心			2012-08-28 10	继发	病原学阴性		刘文	2012-08-28	新患者	初治		2012-08-28							治疗				完成疗程
		389	普通病案	湖北省武汉市武昌区	武昌区疾病预防控制中心	湖北省武汉市武昌区	武昌区疾病预防控制中心	420106010-2012-00473	389	22	男性	汉族	学生	本县区	420106003		直接就诊	2012-08-25	2012-08-28	3	阴性	2012-08-28	湖北省武汉市武昌区	武昌区疾病预防控制中心	湖北省武汉市武昌区	武昌区疾病预防控制中心			2012-08-28 11	继发	病原学阴性		刘文	2012-08-28	新患者	初治		2012-08-28							治疗				完成疗程
		390	普通病案	湖北省武汉市东西湖区	东西湖区结核病防治所	湖北省武汉市东西湖区	东西湖区结核病防治所	420112019-2012-00170	390	20	男性	汉族	学生	本县区	420112008		转诊	2012-07-10	2012-08-23	44			湖北省武汉市东西湖区	东西湖区结核病防治所	湖北省武汉市东西湖区	东西湖区结核病防治所			2012-08-28 16	继发	病原学阴性		孟刚	2012-08-28	新患者	初治		2012-08-28							治疗	湖北省武汉市东西湖区	东西湖区长青街卫生院		完成疗程
		391	普通病案	湖北省武汉市洪山区	洪山区疾病预防控制中心	湖北省武汉市洪山区	洪山区疾病预防控制中心	420111016-2012-00459	391	23	女性	汉族	学生	本县区	420111001		转诊	2012-08-28	2012-09-03	6	阴性	2012-09-04	湖北省武汉市洪山区	洪山区疾病预防控制中心	湖北省武汉市洪山区	洪山区疾病预防控制中心			2012-09-04 14	继发	病原学阴性		李仁惠	2012-09-04	新患者	初治		2012-09-04							治疗	湖北省武汉市洪山区	武汉市洪山区中医医院		完成疗程
		392	普通病案	湖北省武汉市江岸区	江岸区疾病预防控制中心	湖北省武汉市江岸区	江岸区疾病预防控制中心	420102000-2012-00366	392	17	女性	汉族	学生	本市其它县区	420102016		转诊	2012-08-07	2012-08-10	3	未提供		湖北省武汉市江岸区	江岸区疾病预防控制中心	湖北省武汉市江岸区	江岸区疾病预防控制中心			2012-09-05 08	继发	病原学阳性		曾洁	2012-09-05	新患者	初治		2012-09-05							治疗	湖北省武汉市江岸区	江岸区谌家矶街社区卫生服务中心		治愈
		393	普通病案	湖北省武汉市江岸区	江岸区疾病预防控制中心	湖北省武汉市江岸区	江岸区疾病预防控制中心	420102000-2012-00370	393	16	男性	汉族	学生	本市其它县区	420102009		转诊	2012-08-08	2012-08-13	5	阴性	2012-08-18	湖北省武汉市江岸区	江岸区疾病预防控制中心	湖北省武汉市江岸区	江岸区疾病预防控制中心			2012-09-06 15	继发	病原学阳性		连展	2012-09-06	新患者	初治		2012-09-06							治疗	湖北省武汉市江岸区	江岸区劳动街社区卫生服务中心		治愈
		394	普通病案	湖北省武汉市江汉区	武汉市江汉区疾病预防控制中心	湖北省武汉市江汉区	武汉市江汉区疾病预防控制中心	420103013-2012-00294	394	19	女性	汉族	学生	本县区	420103004		追踪	2012-08-31	2012-09-03	3	阴性	2012-08-31	湖北省武汉市江汉区	武汉市江汉区疾病预防控制中心	湖北省武汉市江汉区	武汉市江汉区疾病预防控制中心			2012-09-07 08	继发	病原学阳性		孙学智	2012-09-07	新患者	初治		2012-09-07							治疗	湖北省武汉市江汉区	江汉区民权街社区卫生服务中心		治愈
		395	普通病案	湖北省武汉市洪山区	洪山区疾病预防控制中心	湖北省武汉市洪山区	洪山区疾病预防控制中心	420111016-2012-00465	395	19	男性	汉族	学生	本县区	420111002		转诊	2012-08-29	2012-09-06	8	阴性	2012-09-07	湖北省武汉市洪山区	洪山区疾病预防控制中心	湖北省武汉市洪山区	洪山区疾病预防控制中心			2012-09-07 08	继发	病原学阴性		李仁惠	2012-09-07	新患者	初治		2012-09-07							治疗	湖北省武汉市洪山区	洪山区关山街华中科技大学医院		完成疗程
		396	普通病案	湖北省武汉市洪山区	洪山区疾病预防控制中心	湖北省武汉市洪山区	洪山区疾病预防控制中心	420111016-2012-00462	396	23	女性	汉族	学生	本县区	420111003		转诊	2012-09-02	2012-09-03	1	阴性	2012-09-07	湖北省武汉市洪山区	洪山区疾病预防控制中心	湖北省武汉市洪山区	洪山区疾病预防控制中心			2012-09-07 10	继发	病原学阴性		吴杰	2012-09-07	新患者	初治		2012-09-07							治疗	湖北省武汉市洪山区	洪山区狮子山街华中农业大学医院		完成疗程
		397	普通病案	湖北省武汉市洪山区	洪山区疾病预防控制中心	湖北省武汉市洪山区	洪山区疾病预防控制中心	420111016-2012-00467	397	22	女性	汉族	学生	本县区	420111002		转诊	2012-09-05	2012-09-06	1	阴性	2012-09-07	湖北省武汉市洪山区	洪山区疾病预防控制中心	湖北省武汉市洪山区	洪山区疾病预防控制中心			2012-09-07 08	继发	病原学阴性		李仁惠	2012-09-07	新患者	初治		2012-09-07							治疗	湖北省武汉市洪山区	洪山区关山街华中科技大学医院		完成疗程
		398	普通病案	湖北省武汉市洪山区	洪山区疾病预防控制中心	湖北省武汉市洪山区	洪山区疾病预防控制中心	420111016-2012-00463	398	20	男性	汉族	学生	本县区	420111003		转诊	2012-09-02	2012-09-03	1	阴性	2012-09-07	湖北省武汉市洪山区	洪山区疾病预防控制中心	湖北省武汉市洪山区	洪山区疾病预防控制中心			2012-09-07 10	继发	病原学阴性		李仁惠	2012-09-07	新患者	初治		2012-09-07							治疗	湖北省武汉市洪山区	湖北工业大学医院		完成疗程
		399	普通病案	湖北省武汉市青山区	青山区结核病防治所	湖北省武汉市青山区	青山区结核病防治所	420107018-2012-00234	399	17	女性	藏族	学生	本县区	420107005		转诊	2012-08-25	2012-08-30	5	阴性	2012-09-10	湖北省武汉市青山区	青山区结核病防治所	湖北省武汉市青山区	青山区结核病防治所			2012-09-10 08	继发	病原学阳性		郑和平	2012-09-10	新患者	初治		2012-09-10							治疗	湖北省武汉市青山区	青山区结核病防治所		治愈
		400	普通病案	湖北省武汉市洪山区	洪山区疾病预防控制中心	湖北省武汉市洪山区	洪山区疾病预防控制中心	420111016-2012-00468	400	20	女性	汉族	学生	本县区	420111008		转诊	2012-09-01	2012-09-06	5	阴性	2012-09-10	湖北省武汉市洪山区	洪山区疾病预防控制中心	湖北省武汉市洪山区	洪山区疾病预防控制中心			2012-09-10 14	继发	病原学阴性		李仁惠	2012-09-10	新患者	初治		2012-09-10							治疗	湖北省武汉市洪山区	洪山区和平街社区卫生服务中心		完成疗程
		401	普通病案	湖北省武汉市黄陂区	武汉市黄陂区疾病预防控制中心	湖北省武汉市黄陂区	武汉市黄陂区疾病预防控制中心	420116003-2012-00644	401	20	男性	汉族	学生	本县区	420116004		直接就诊	2012-09-01	2012-09-11	10			湖北省武汉市黄陂区	武汉市黄陂区疾病预防控制中心	湖北省武汉市黄陂区	武汉市黄陂区疾病预防控制中心			2012-09-11 15	继发	病原学阴性		阮爱华	2012-09-11	新患者	初治		2012-09-11							治疗	湖北省武汉市黄陂区	武汉市黄陂区罗汉寺街卫生院		完成疗程
		402	普通病案	湖北省武汉市青山区	青山区结核病防治所	湖北省武汉市青山区	青山区结核病防治所	420107018-2012-00240	402	18	女性	汉族	学生	本市其它县区	420107999		转诊	2012-09-08	2012-09-10	2			湖北省武汉市青山区	青山区结核病防治所	湖北省武汉市青山区	青山区结核病防治所			2012-09-11 09	继发	病原学阳性		郑和平	2012-09-11	新患者	初治		2012-09-11							治疗	湖北省武汉市青山区	青山区结核病防治所		治愈
		403	普通病案	湖北省武汉市青山区	青山区结核病防治所	湖北省武汉市青山区	青山区结核病防治所	420107018-2012-00241	403	22	男性	汉族	学生	本县区	420107001		直接就诊	2012-08-13	2012-09-07	25			湖北省武汉市青山区	青山区结核病防治所	湖北省武汉市青山区	青山区结核病防治所			2012-09-11 15	继发	病原学阳性		郑和平	2012-09-11	新患者	初治		2012-09-11							治疗	湖北省武汉市青山区	武汉市第九医院		治愈
		404	普通病案	湖北省武汉市东西湖区	东西湖区结核病防治所	湖北省武汉市东西湖区	东西湖区结核病防治所	420112019-2012-00174	404	21	女性	汉族	学生	本县区	420112004		转诊	2012-08-25	2012-08-27	2	阴性	2012-09-13	湖北省武汉市东西湖区	东西湖区结核病防治所	湖北省武汉市东西湖区	东西湖区结核病防治所			2012-09-13 14	继发	病原学阳性		孟刚	2012-09-13	新患者	初治		2012-09-13							治疗	湖北省武汉市东西湖区	东西湖区将军路街卫生院		治愈
		405	普通病案	湖北省武汉市洪山区	洪山区疾病预防控制中心	湖北省武汉市洪山区	洪山区疾病预防控制中心	420111016-2012-00477	405	17	女性	汉族	学生	本县区	420111002		转诊	2012-09-06	2012-09-11	5	阴性	2012-09-13	湖北省武汉市洪山区	洪山区疾病预防控制中心	湖北省武汉市洪山区	洪山区疾病预防控制中心			2012-09-13 08	继发	病原学阴性		李仁惠	2012-09-13	新患者	初治		2012-09-13							治疗	湖北省武汉市洪山区	洪山区关山街华中科技大学医院		完成疗程
		406	普通病案	湖北省武汉市汉阳区	武汉市汉阳区结核病防治所	湖北省武汉市汉阳区	武汉市汉阳区结核病防治所	420105012-2012-00271	406	18	男性	汉族	学生	本县区	420105009		转诊	2012-06-01	2012-09-06	97	阴性	2012-09-06	湖北省武汉市汉阳区	武汉市汉阳区结核病防治所	湖北省武汉市汉阳区	武汉市汉阳区结核病防治所			2012-09-14 15	继发	病原学阴性		朱建	2012-09-14	新患者	初治	2012-11-06	2012-09-14							治疗	湖北省武汉市汉阳区	武汉市汉阳区二桥街社区卫生服务中心		完成疗程
		407	普通病案	湖北省武汉市洪山区	洪山区疾病预防控制中心	湖北省武汉市洪山区	洪山区疾病预防控制中心	420111016-2012-00479	407	19	男性	汉族	学生	本县区	420111003		转诊	2012-09-01	2012-09-07	6	阴性	2012-09-14	湖北省武汉市洪山区	洪山区疾病预防控制中心	湖北省武汉市洪山区	洪山区疾病预防控制中心			2012-09-14 08	继发	病原学阴性		吴杰	2012-09-14	新患者	初治		2012-09-14							治疗	湖北省武汉市洪山区	湖北工业大学医院		完成疗程
		408	普通病案	湖北省武汉市黄陂区	武汉市黄陂区疾病预防控制中心	湖北省武汉市黄陂区	武汉市黄陂区疾病预防控制中心	420116003-2012-00667	408	15	男性	汉族	学生	本县区	420116006		直接就诊	2012-09-10	2012-09-17	7			湖北省武汉市黄陂区	武汉市黄陂区疾病预防控制中心	湖北省武汉市黄陂区	武汉市黄陂区疾病预防控制中心			2012-09-17 15	继发	病原学阴性		梅建勇	2012-09-17	新患者	初治		2012-09-17							治疗	湖北省武汉市黄陂区	六指街道中心卫生院		完成疗程
		409	普通病案	湖北省武汉市武昌区	武昌区疾病预防控制中心	湖北省武汉市武昌区	武昌区疾病预防控制中心	420106010-2012-00513	409	17	男性	汉族	学生	本县区	420106013		转诊	2012-08-10	2012-09-10	31	阴性	2012-09-18	湖北省武汉市武昌区	武昌区疾病预防控制中心	湖北省武汉市武昌区	武昌区疾病预防控制中心			2012-09-18 11	继发	病原学阴性		刘文	2012-09-18	新患者	初治		2012-09-18							治疗				完成疗程
		410	普通病案	湖北省武汉市洪山区	洪山区疾病预防控制中心	湖北省武汉市洪山区	洪山区疾病预防控制中心	420111016-2012-00491	410	19	女性	汉族	学生	本县区	420111002		转诊	2012-09-16	2012-09-17	1	阴性	2012-09-18	湖北省武汉市洪山区	洪山区疾病预防控制中心	湖北省武汉市洪山区	洪山区疾病预防控制中心			2012-09-18 14	继发	病原学阳性		李仁惠	2012-09-18	新患者	初治		2012-09-18							治疗	湖北省武汉市洪山区	武汉市第三医院光谷院区		治愈
		411	普通病案	湖北省武汉市洪山区	洪山区疾病预防控制中心	湖北省武汉市洪山区	洪山区疾病预防控制中心	420111016-2012-00484	411	24	女性	汉族	学生	本县区	420111001		转诊	2012-09-03	2012-09-15	12	阴性	2012-09-18	湖北省武汉市洪山区	洪山区疾病预防控制中心	湖北省武汉市洪山区	洪山区疾病预防控制中心			2012-09-18 08	继发	病原学阴性		李仁惠	2012-09-18	新患者	初治		2012-09-18							治疗	湖北省武汉市洪山区	洪山区珞南街华中师范大学医院		完成疗程
		412	普通病案	湖北省武汉市洪山区	洪山区疾病预防控制中心	湖北省武汉市洪山区	洪山区疾病预防控制中心	420111016-2012-00486	412	19	男性	汉族	学生	本县区	420111001		转诊	2012-09-11	2012-09-15	4	阴性	2012-09-18	湖北省武汉市洪山区	洪山区疾病预防控制中心	湖北省武汉市洪山区	洪山区疾病预防控制中心			2012-09-18 08	继发	病原学阴性		吴杰	2012-09-18	新患者	初治		2012-09-18							治疗	湖北省武汉市洪山区	洪山区珞南街理工大社区卫生服务中心		完成疗程
		413	普通病案	湖北省武汉市洪山区	洪山区疾病预防控制中心	湖北省武汉市洪山区	洪山区疾病预防控制中心	420111016-2012-00489	413	21	男性	汉族	学生	本县区	420111008		转诊	2012-09-06	2012-09-16	10	阴性	2012-09-18	湖北省武汉市洪山区	洪山区疾病预防控制中心	湖北省武汉市洪山区	洪山区疾病预防控制中心			2012-09-18 15	继发	病原学阳性		吴杰	2012-09-18	新患者	初治		2012-09-18							治疗	湖北省武汉市洪山区	洪山区和平街社区卫生服务中心		治愈
		414	普通病案	湖北省武汉市洪山区	洪山区疾病预防控制中心	湖北省武汉市洪山区	洪山区疾病预防控制中心	420111016-2012-00488	414	20	男性	汉族	学生	本县区	420111001		转诊	2012-08-01	2012-09-17	47	阴性	2012-09-18	湖北省武汉市洪山区	洪山区疾病预防控制中心	湖北省武汉市洪山区	洪山区疾病预防控制中心			2012-09-18 08	继发	病原学阴性		李仁惠	2012-09-18	新患者	初治		2012-09-18							治疗	湖北省武汉市洪山区	洪山区珞南街华中师范大学医院		完成疗程
		415	普通病案	湖北省武汉市洪山区	洪山区疾病预防控制中心	湖北省武汉市洪山区	洪山区疾病预防控制中心	420111016-2012-00485	415	18	男性	汉族	学生	本县区	420111002		转诊	2012-09-07	2012-09-15	8	阴性	2012-09-18	湖北省武汉市洪山区	洪山区疾病预防控制中心	湖北省武汉市洪山区	洪山区疾病预防控制中心			2012-09-18 08	继发	病原学阴性		李仁惠	2012-09-18	新患者	初治		2012-09-18							治疗	湖北省武汉市洪山区	中国地质大学医院		完成疗程
		416	普通病案	湖北省武汉市江岸区	江岸区疾病预防控制中心	湖北省武汉市江岸区	江岸区疾病预防控制中心	420102000-2012-00393	416	21	女性	汉族	学生	本市其它县区	420102015		转诊	2012-09-02	2012-09-18	16	未提供		湖北省武汉市江岸区	江岸区疾病预防控制中心	湖北省武汉市江岸区	江岸区疾病预防控制中心			2012-09-21 14	继发	病原学阴性		姚芳	2012-09-21	新患者	初治		2012-09-21							治疗	湖北省武汉市江岸区	江岸区花桥街第一社区卫生服务中心		完成疗程
		417	普通病案	湖北省武汉市江岸区	江岸区疾病预防控制中心	湖北省武汉市江岸区	江岸区疾病预防控制中心	420102000-2012-00392	417	17	男性	汉族	学生	本市其它县区	420102007		转诊	2012-08-30	2012-09-06	7	未提供		湖北省武汉市江岸区	江岸区疾病预防控制中心	湖北省武汉市江岸区	江岸区疾病预防控制中心			2012-09-21 14	继发	病原学阴性		曾洁	2012-09-21	新患者	初治		2012-09-21							治疗	湖北省武汉市江岸区	江岸区西马街社区卫生服务中心		完成疗程
		418	普通病案	湖北省武汉市江汉区	武汉市江汉区疾病预防控制中心	湖北省武汉市江汉区	武汉市江汉区疾病预防控制中心	420103013-2012-00309	418	17	女性	汉族	学生	本县区	420103012		追踪	2012-09-09	2012-09-13	4	阴性	2012-09-13	湖北省武汉市江汉区	武汉市江汉区疾病预防控制中心	湖北省武汉市江汉区	武汉市江汉区疾病预防控制中心			2012-09-21 08	继发	病原学阳性		孙学智	2012-09-21	新患者	初治		2012-09-21							治疗	湖北省武汉市江汉区	江汉区常青街社区卫生服务中心		治愈
		419	普通病案	湖北省武汉市黄陂区	武汉市黄陂区疾病预防控制中心	湖北省武汉市黄陂区	武汉市黄陂区疾病预防控制中心	420116003-2012-00679	419	18	男性	汉族	学生	本县区	420116012		直接就诊	2012-09-05	2012-09-21	16			湖北省武汉市黄陂区	武汉市黄陂区疾病预防控制中心	湖北省武汉市黄陂区	武汉市黄陂区疾病预防控制中心			2012-09-21 10	继发	病原学阴性		吴汉先	2012-09-21	新患者	初治		2012-09-21							治疗	湖北省武汉市黄陂区	武汉市黄陂区姚家集街道卫生院		完成疗程
		420	普通病案	湖北省武汉市江汉区	武汉市江汉区疾病预防控制中心	湖北省武汉市江汉区	武汉市江汉区疾病预防控制中心	420103013-2012-00304	420	17	男性	汉族	学生	本县区	420103013		追踪	2012-09-13	2012-09-17	4	阴性	2012-09-19	湖北省武汉市江汉区	武汉市江汉区疾病预防控制中心	湖北省武汉市江汉区	武汉市江汉区疾病预防控制中心			2012-09-21 09	继发	病原学阴性		姚芳	2012-09-21	新患者	初治		2012-09-21							治疗	湖北省武汉市江汉区	江汉区汉兴街社区卫生服务中心		完成疗程
		421	普通病案	湖北省武汉市蔡甸区	武汉市蔡甸区疾病预防控制中心	湖北省武汉市蔡甸区	武汉市蔡甸区疾病预防控制中心	420114003-2012-00332	421	18	男性	汉族	学生	本县区	420114004		转诊	2012-09-11	2012-09-21	10			湖北省武汉市蔡甸区	武汉市蔡甸区疾病预防控制中心	湖北省武汉市蔡甸区	武汉市蔡甸区疾病预防控制中心			2012-09-21 15	继发	病原学阴性		刘晓燕	2012-09-21	新患者	初治		2012-09-21							治疗	湖北省武汉市蔡甸区	武汉市蔡甸区侏儒街卫生院		不良反应
		422	普通病案	湖北省武汉市青山区	青山区结核病防治所	湖北省武汉市青山区	青山区结核病防治所	420107018-2012-00248	422	24	男性	汉族	学生	本市其它县区	420107002		转诊	2012-08-16	2012-09-09	24			湖北省武汉市青山区	青山区结核病防治所	湖北省武汉市青山区	青山区结核病防治所			2012-09-21 15	继发	病原学阳性		郑和平	2012-09-21	新患者	初治		2012-09-21							治疗	湖北省武汉市青山区	青山区结核病防治所		治愈
		423	普通病案	湖北省武汉市青山区	青山区结核病防治所	湖北省武汉市青山区	青山区结核病防治所	420107018-2012-00247	423	19	女性	汉族	学生	本县区	420107002		直接就诊	2012-08-23	2012-08-31	8			湖北省武汉市青山区	青山区结核病防治所	湖北省武汉市青山区	青山区结核病防治所			2012-09-21 15	继发	病原学阴性		郑和平	2012-09-21	新患者	初治		2012-09-21							治疗	湖北省武汉市青山区	青山区结核病防治所		完成疗程
		424	普通病案	湖北省武汉市汉南区	武汉市汉南区疾病预防控制中心	湖北省武汉市汉南区	武汉市汉南区疾病预防控制中心	420113006-2012-00244	424	18	男性	汉族	学生	本县区	420113096		健康体检	2012-09-02	2012-09-20	18	阴性	2012-09-20	湖北省武汉市汉南区	武汉市汉南区疾病预防控制中心	湖北省武汉市汉南区	武汉市汉南区疾病预防控制中心			2012-09-21 10	继发	病原学阴性		熊勤涛	2012-09-21	新患者	初治	2012-11-22	2012-09-21							治疗	湖北省武汉市汉南区	武汉市汉南区疾病预防控制中心		完成疗程
		425	普通病案	湖北省武汉市武昌区	武昌区疾病预防控制中心	湖北省武汉市武昌区	武昌区疾病预防控制中心	420106010-2012-00533	425	14	女性	汉族	学生	本县区	420106011		转诊	2012-09-18	2012-09-18	0	阴性	2012-09-24	湖北省武汉市武昌区	武昌区疾病预防控制中心	湖北省武汉市武昌区	武昌区疾病预防控制中心			2012-09-24 16	继发	病原学阴性		刘文	2012-09-24	新患者	初治		2012-09-24							治疗				完成疗程
		426	普通病案	湖北省武汉市武昌区	武昌区疾病预防控制中心	湖北省武汉市武昌区	武昌区疾病预防控制中心	420106010-2012-00535	426	18	男性	汉族	学生	本县区	420106002		转诊	2012-08-22	2012-09-12	21	阴性	2012-09-24	湖北省武汉市武昌区	武昌区疾病预防控制中心	湖北省武汉市武昌区	武昌区疾病预防控制中心			2012-09-24 14	继发	病原学阳性		刘文	2012-09-24	新患者	初治		2012-09-24							治疗				治愈
		427	普通病案	湖北省武汉市洪山区	洪山区疾病预防控制中心	湖北省武汉市洪山区	洪山区疾病预防控制中心	420111016-2012-00504	427	20	男性	蒙古族	学生	本县区	420111001		转诊	2012-09-11	2012-09-22	11	阴性	2012-09-24	湖北省武汉市洪山区	洪山区疾病预防控制中心	湖北省武汉市洪山区	洪山区疾病预防控制中心			2012-09-24 10	继发	病原学阴性		李仁惠	2012-09-24	新患者	初治		2012-09-24							治疗	湖北省武汉市洪山区	洪山区珞南街华中师范大学医院		完成疗程
		428	普通病案	湖北省武汉市洪山区	洪山区疾病预防控制中心	湖北省武汉市洪山区	洪山区疾病预防控制中心	420111016-2012-00498	428	21	男性	汉族	学生	本县区	420111002		转诊	2012-09-14	2012-09-19	5	阴性	2012-09-24	湖北省武汉市洪山区	洪山区疾病预防控制中心	湖北省武汉市洪山区	洪山区疾病预防控制中心			2012-09-24 10	继发	病原学阴性		吴杰	2012-09-24	新患者	初治		2012-09-24							治疗	湖北省武汉市洪山区	洪山区疾病预防控制中心		完成疗程
		429	普通病案	湖北省武汉市洪山区	洪山区疾病预防控制中心	湖北省武汉市洪山区	洪山区疾病预防控制中心	420111016-2012-00496	429	18	男性	汉族	学生	本县区	420111002		转诊	2012-09-09	2012-09-19	10	阴性	2012-09-24	湖北省武汉市洪山区	洪山区疾病预防控制中心	湖北省武汉市洪山区	洪山区疾病预防控制中心			2012-09-24 10	继发	病原学阴性		吴杰	2012-09-24	新患者	初治		2012-09-24							治疗	湖北省武汉市洪山区	洪山区疾病预防控制中心		完成疗程
		430	普通病案	湖北省武汉市洪山区	洪山区疾病预防控制中心	湖北省武汉市洪山区	洪山区疾病预防控制中心	420111016-2012-00492	430	18	男性	汉族	学生	本县区	420111002		转诊	2012-09-12	2012-09-13	1	阴性	2012-09-24	湖北省武汉市洪山区	洪山区疾病预防控制中心	湖北省武汉市洪山区	洪山区疾病预防控制中心			2012-09-24 10	继发	病原学阴性		吴杰	2012-09-24	新患者	初治		2012-09-24							治疗	湖北省武汉市洪山区	洪山区疾病预防控制中心		完成疗程
		431	普通病案	湖北省武汉市洪山区	洪山区疾病预防控制中心	湖北省武汉市洪山区	洪山区疾病预防控制中心	420111016-2012-00503	431	19	男性	汉族	学生	本县区	420111003		转诊	2012-09-18	2012-09-21	3	阴性	2012-09-24	湖北省武汉市洪山区	洪山区疾病预防控制中心	湖北省武汉市洪山区	洪山区疾病预防控制中心			2012-09-24 14	继发	病原学阴性		吴杰	2012-09-24	新患者	初治		2012-09-24							治疗	湖北省武汉市洪山区	湖北工业大学医院		完成疗程
		432	普通病案	湖北省武汉市洪山区	洪山区疾病预防控制中心	湖北省武汉市洪山区	洪山区疾病预防控制中心	420111016-2012-00497	432	19	男性	汉族	学生	本县区	420111001		转诊	2012-09-13	2012-09-19	6	阴性	2012-09-24	湖北省武汉市洪山区	洪山区疾病预防控制中心	湖北省武汉市洪山区	洪山区疾病预防控制中心			2012-09-24 14	继发	病原学阴性		李仁惠	2012-09-24	新患者	初治		2012-09-24							治疗	湖北省武汉市洪山区	洪山区珞南街华中师范大学医院		完成疗程
		433	普通病案	湖北省武汉市洪山区	洪山区疾病预防控制中心	湖北省武汉市洪山区	洪山区疾病预防控制中心	420111016-2012-00499	433	21	男性	汉族	学生	本县区	420111002		转诊	2012-09-14	2012-09-19	5	阴性	2012-09-24	湖北省武汉市洪山区	洪山区疾病预防控制中心	湖北省武汉市洪山区	洪山区疾病预防控制中心			2012-09-24 10	继发	病原学阴性		李仁惠	2012-09-24	新患者	初治		2012-09-24							治疗	湖北省武汉市洪山区	洪山区疾病预防控制中心		完成疗程
		434	普通病案	湖北省武汉市洪山区	洪山区疾病预防控制中心	湖北省武汉市洪山区	洪山区疾病预防控制中心	420111016-2012-00495	434	18	男性	汉族	学生	本县区	420111002		转诊	2012-09-12	2012-09-19	7	阴性	2012-09-24	湖北省武汉市洪山区	洪山区疾病预防控制中心	湖北省武汉市洪山区	洪山区疾病预防控制中心			2012-09-24 14	继发	病原学阴性		李仁惠	2012-09-24	新患者	初治		2012-09-24							治疗	湖北省武汉市洪山区	洪山区疾病预防控制中心		完成疗程
		435	普通病案	湖北省武汉市洪山区	洪山区疾病预防控制中心	湖北省武汉市洪山区	洪山区疾病预防控制中心	420111016-2012-00501	435	19	男性	汉族	学生	本县区	420111006		转诊	2012-09-15	2012-09-21	6	阴性	2012-09-24	湖北省武汉市洪山区	洪山区疾病预防控制中心	湖北省武汉市洪山区	洪山区疾病预防控制中心			2012-09-24 14	继发	病原学阴性		李仁惠	2012-09-24	新患者	初治		2012-09-24							治疗	湖北省武汉市洪山区	洪山区疾病预防控制中心		完成疗程
		436	普通病案	湖北省武汉市洪山区	洪山区疾病预防控制中心	湖北省武汉市洪山区	洪山区疾病预防控制中心	420111016-2012-00502	436	19	男性	汉族	学生	本县区	420111002		转诊	2012-09-20	2012-09-21	1	阴性	2012-09-24	湖北省武汉市洪山区	洪山区疾病预防控制中心	湖北省武汉市洪山区	洪山区疾病预防控制中心			2012-09-24 14	继发	病原学阴性		李仁惠	2012-09-24	新患者	初治		2012-09-24							治疗	湖北省武汉市洪山区	洪山区关山街华中科技大学医院		完成疗程
		437	普通病案	湖北省武汉市洪山区	洪山区疾病预防控制中心	湖北省武汉市洪山区	洪山区疾病预防控制中心	420111016-2012-00493	437	19	女性	汉族	学生	本县区	420111002		转诊	2012-09-12	2012-09-19	7	阴性	2012-09-24	湖北省武汉市洪山区	洪山区疾病预防控制中心	湖北省武汉市洪山区	洪山区疾病预防控制中心			2012-09-24 10	继发	病原学阴性		李仁惠	2012-09-24	新患者	初治		2012-09-24							治疗	湖北省武汉市洪山区	洪山区疾病预防控制中心		完成疗程
		438	普通病案	湖北省武汉市江岸区	江岸区疾病预防控制中心	湖北省武汉市江岸区	江岸区疾病预防控制中心	420102000-2012-00397	438	16	男性	汉族	学生	本市其它县区	420102010		转诊	2012-08-31	2012-09-07	7	阴性	2012-09-07	湖北省武汉市江岸区	江岸区疾病预防控制中心	湖北省武汉市江岸区	江岸区疾病预防控制中心			2012-09-25 11	继发	病原学阴性		杜娟	2012-09-25	新患者	初治		2012-09-25							治疗	湖北省武汉市江岸区	江岸区二七街社区卫生服务中心		转入耐多药治疗
		439	普通病案	湖北省武汉市武昌区	武昌区疾病预防控制中心	湖北省武汉市武昌区	武昌区疾病预防控制中心	420106010-2012-00537	439	22	女性	汉族	学生	本县区	420106013		转诊	2012-09-09	2012-09-16	7	阴性	2012-09-25	湖北省武汉市武昌区	武昌区疾病预防控制中心	湖北省武汉市武昌区	武昌区疾病预防控制中心			2012-09-25 08	继发	病原学阳性		刘文	2012-09-25	新患者	初治		2012-09-25							治疗				治愈
		440	普通病案	湖北省武汉市武昌区	武昌区疾病预防控制中心	湖北省武汉市武昌区	武昌区疾病预防控制中心	420106010-2012-00539	440	26	女性	汉族	学生	本县区	420106002		直接就诊	2012-09-24	2012-09-25	1	阴性	2012-09-25	湖北省武汉市武昌区	武昌区疾病预防控制中心	湖北省武汉市武昌区	武昌区疾病预防控制中心			2012-09-25 08	继发	病原学阴性		刘文	2012-09-25	新患者	初治		2012-09-25							治疗				完成疗程
		441	普通病案	湖北省武汉市洪山区	洪山区疾病预防控制中心	湖北省武汉市洪山区	洪山区疾病预防控制中心	420111016-2012-00518	441	20	男性	汉族	学生	本县区	420111006		转诊	2012-09-14	2012-09-20	6	阴性	2012-09-25	湖北省武汉市洪山区	洪山区疾病预防控制中心	湖北省武汉市洪山区	洪山区疾病预防控制中心			2012-09-25 11	继发	病原学阴性		李仁惠	2012-09-25	新患者	初治		2012-09-25							治疗	湖北省武汉市洪山区	洪山区疾病预防控制中心		完成疗程
		442	普通病案	湖北省武汉市洪山区	洪山区疾病预防控制中心	湖北省武汉市洪山区	洪山区疾病预防控制中心	420111016-2012-00514	442	21	女性	汉族	学生	本县区	420111003		转诊	2012-09-10	2012-09-18	8	阴性	2012-09-25	湖北省武汉市洪山区	洪山区疾病预防控制中心	湖北省武汉市洪山区	洪山区疾病预防控制中心			2012-09-25 09	继发	病原学阳性		吴杰	2012-09-25	新患者	初治		2012-09-25							治疗	湖北省武汉市洪山区	湖北工业大学医院		治愈
		443	普通病案	湖北省武汉市洪山区	洪山区疾病预防控制中心	湖北省武汉市洪山区	洪山区疾病预防控制中心	420111016-2012-00517	443	29	男性	汉族	学生	本县区	420111001		直接就诊	2012-09-10	2012-09-20	10	阴性	2012-09-25	湖北省武汉市洪山区	洪山区疾病预防控制中心	湖北省武汉市洪山区	洪山区疾病预防控制中心			2012-09-25 11	继发	病原学阴性		吴杰	2012-09-25	新患者	初治		2012-09-25							治疗	湖北省武汉市洪山区	洪山区珞南街理工大社区卫生服务中心		完成疗程
		444	普通病案	湖北省武汉市洪山区	洪山区疾病预防控制中心	湖北省武汉市洪山区	洪山区疾病预防控制中心	420111016-2012-00516	444	18	男性	汉族	学生	本县区	420111002		转诊	2012-09-14	2012-09-19	5	阴性	2012-09-25	湖北省武汉市洪山区	洪山区疾病预防控制中心	湖北省武汉市洪山区	洪山区疾病预防控制中心			2012-09-25 10	继发	病原学阴性		吴杰	2012-09-25	新患者	初治		2012-09-25							治疗	湖北省武汉市洪山区	洪山区疾病预防控制中心		完成疗程
		445	普通病案	湖北省武汉市洪山区	洪山区疾病预防控制中心	湖北省武汉市洪山区	洪山区疾病预防控制中心	420111016-2012-00515	445	18	男性	汉族	学生	本县区	420111007		转诊	2012-09-15	2012-09-19	4	阴性	2012-09-25	湖北省武汉市洪山区	洪山区疾病预防控制中心	湖北省武汉市洪山区	洪山区疾病预防控制中心			2012-09-25 10	继发	病原学阴性		李仁惠	2012-09-25	新患者	初治		2012-09-25							治疗	湖北省武汉市洪山区	洪山区洪山街社区卫生服务中心		完成疗程
		446	普通病案	湖北省武汉市洪山区	洪山区疾病预防控制中心	湖北省武汉市洪山区	洪山区疾病预防控制中心	420111016-2012-00510	446	22	男性	汉族	学生	本县区	420111001		转诊	2012-09-18	2012-09-24	6	阴性	2012-09-25	湖北省武汉市洪山区	洪山区疾病预防控制中心	湖北省武汉市洪山区	洪山区疾病预防控制中心			2012-09-25 08	继发	病原学阴性		李仁惠	2012-09-25	新患者	初治		2012-09-25							治疗	湖北省武汉市洪山区	洪山区珞南街华中师范大学医院		完成疗程
		447	普通病案	湖北省武汉市洪山区	洪山区疾病预防控制中心	湖北省武汉市洪山区	洪山区疾病预防控制中心	420111016-2012-00511	447	20	女性	汉族	学生	本县区	420111001		转诊	2012-07-11	2012-09-24	75	阴性	2012-09-25	湖北省武汉市洪山区	洪山区疾病预防控制中心	湖北省武汉市洪山区	洪山区疾病预防控制中心			2012-09-25 08	继发	病原学阳性		李仁惠	2012-09-25	新患者	初治		2012-09-25							治疗	湖北省武汉市洪山区	洪山区珞南街理工大社区卫生服务中心		治愈
		448	普通病案	湖北省武汉市东西湖区	东西湖区结核病防治所	湖北省武汉市东西湖区	东西湖区结核病防治所	420112019-2012-00177	448	15	男性	汉族	学生	本县区	420112001		直接就诊	2012-04-06	2012-09-26	173			湖北省武汉市东西湖区	东西湖区结核病防治所	湖北省武汉市东西湖区	东西湖区结核病防治所			2012-09-26 10	继发	病原学阳性		孟刚	2012-09-26	新患者	初治		2012-09-26							治疗	湖北省武汉市东西湖区	东西湖区吴家山街社区卫生服务中心		治愈
		449	普通病案	湖北省武汉市江岸区	江岸区疾病预防控制中心	湖北省武汉市江岸区	江岸区疾病预防控制中心	420102000-2012-00405	449	21	女性	汉族	学生	本市其它县区	420102003		转诊	2012-08-01	2012-09-18	48	阴性	2012-09-18	湖北省武汉市江岸区	江岸区疾病预防控制中心	湖北省武汉市江岸区	江岸区疾病预防控制中心			2012-09-27 14	继发	病原学阳性		陈国玺	2012-09-27	新患者	初治		2012-09-27							治疗	湖北省武汉市江岸区	江岸区车站街社区卫生服务中心		治愈
		450	普通病案	湖北省武汉市东西湖区	东西湖区结核病防治所	湖北省武汉市东西湖区	东西湖区结核病防治所	420112019-2012-00181	450	17	男性	汉族	学生	本县区	420112008		追踪	2012-08-11	2012-08-16	5	阴性	2012-09-27	湖北省武汉市东西湖区	东西湖区结核病防治所	湖北省武汉市东西湖区	东西湖区结核病防治所			2012-09-27 16	继发	病原学阴性		胡才生	2012-09-27	新患者	初治		2012-09-27							治疗	湖北省武汉市东西湖区	东西湖区长青街卫生院		完成疗程
		451	普通病案	湖北省武汉市洪山区	洪山区疾病预防控制中心	湖北省武汉市洪山区	洪山区疾病预防控制中心	420111016-2012-00520	451	20	男性	汉族	学生	本县区	420111002		转诊	2012-09-21	2012-09-26	5	阴性	2012-09-27	湖北省武汉市洪山区	洪山区疾病预防控制中心	湖北省武汉市洪山区	洪山区疾病预防控制中心			2012-09-27 10	继发	病原学阴性		李仁惠	2012-09-27	新患者	初治		2012-09-27							治疗	湖北省武汉市洪山区	洪山区关山街华中科技大学医院		完成疗程
		452	普通病案	湖北省武汉市武昌区	武昌区疾病预防控制中心	湖北省武汉市武昌区	武昌区疾病预防控制中心	420106010-2012-00546	452	15	男性	汉族	学生	本市其它县区	420106015		转诊	2012-08-26	2012-08-28	2	阴性	2012-09-28	湖北省武汉市武昌区	武昌区疾病预防控制中心	湖北省武汉市武昌区	武昌区疾病预防控制中心			2012-09-28 14	继发	病原学阳性		刘文	2012-09-28	新患者	初治		2012-09-28							治疗				治愈
		453	普通病案	湖北省武汉市武昌区	武昌区疾病预防控制中心	湖北省武汉市武昌区	武昌区疾病预防控制中心	420106010-2012-00547	453	21	女性	汉族	学生	本县区	420106013		转诊	2012-09-11	2012-09-18	7	阴性	2012-09-28	湖北省武汉市武昌区	武昌区疾病预防控制中心	湖北省武汉市武昌区	武昌区疾病预防控制中心			2012-09-28 13	继发	病原学阳性		刘文	2012-09-28	新患者	初治		2012-09-28							治疗				诊断变更
		454	普通病案	湖北省武汉市洪山区	洪山区疾病预防控制中心	湖北省武汉市洪山区	洪山区疾病预防控制中心	420111016-2012-00522	454	18	男性	汉族	学生	本县区	420111002		转诊	2012-09-03	2012-09-10	7	阴性	2012-09-28	湖北省武汉市洪山区	洪山区疾病预防控制中心	湖北省武汉市洪山区	洪山区疾病预防控制中心			2012-09-28 08	继发	病原学阴性		吴杰	2012-09-28	新患者	初治		2012-09-28							治疗	湖北省武汉市洪山区	洪山区疾病预防控制中心		完成疗程
		455	普通病案	湖北省武汉市洪山区	洪山区疾病预防控制中心	湖北省武汉市洪山区	洪山区疾病预防控制中心	420111016-2012-00521	455	18	男性	汉族	学生	本县区	420111002		转诊	2012-09-14	2012-09-17	3	阴性	2012-09-28	湖北省武汉市洪山区	洪山区疾病预防控制中心	湖北省武汉市洪山区	洪山区疾病预防控制中心			2012-09-28 08	继发	病原学阴性		李仁惠	2012-09-28	新患者	初治		2012-09-28							治疗	湖北省武汉市洪山区	洪山区关山街邮电社区卫生服务中心		完成疗程
		456	普通病案	湖北省武汉市黄陂区	武汉市黄陂区疾病预防控制中心	湖北省武汉市黄陂区	武汉市黄陂区疾病预防控制中心	420116003-2012-00696	456	19	女性	汉族	学生	本县区	420116009		直接就诊	2012-09-15	2012-09-30	15			湖北省武汉市黄陂区	武汉市黄陂区疾病预防控制中心	湖北省武汉市黄陂区	武汉市黄陂区疾病预防控制中心			2012-09-30 15	继发	病原学阴性		蔡逸民	2012-09-30	新患者	初治		2012-09-30							治疗	湖北省武汉市黄陂区	武汉市黄陂区王家河街道卫生院		完成疗程
		457	普通病案	湖北省武汉市黄陂区	武汉市黄陂区疾病预防控制中心	湖北省武汉市黄陂区	武汉市黄陂区疾病预防控制中心	420116003-2012-00698	457	20	男性	汉族	学生	本县区	420116001		直接就诊	2012-09-12	2012-10-02	20			湖北省武汉市黄陂区	武汉市黄陂区疾病预防控制中心	湖北省武汉市黄陂区	武汉市黄陂区疾病预防控制中心			2012-10-02 10	继发	病原学阴性		阮爱华	2012-10-02	新患者	初治		2012-10-02							治疗	湖北省武汉市黄陂区	武汉市黄陂区前川街道卫生院		完成疗程
		458	普通病案	湖北省武汉市江岸区	江岸区疾病预防控制中心	湖北省武汉市江岸区	江岸区疾病预防控制中心	420102000-2012-00412	458	18	女性	汉族	学生	本市其它县区	420102015		转诊	2012-07-17	2012-07-18	1			湖北省武汉市江岸区	江岸区疾病预防控制中心	湖北省武汉市江岸区	江岸区疾病预防控制中心			2012-10-06 09	继发	病原学阴性		连展	2012-10-06	新患者	初治		2012-10-06							治疗	湖北省武汉市江岸区	江岸区花桥街第二社区卫生服务中心		完成疗程
		459	普通病案	湖北省武汉市汉阳区	武汉市汉阳区结核病防治所	湖北省武汉市汉阳区	武汉市汉阳区结核病防治所	420105012-2012-00286	459	17	男性	汉族	学生	本县区	420105009		转诊	2012-08-25	2012-09-12	18	阴性	2012-09-12	湖北省武汉市汉阳区	武汉市汉阳区结核病防治所	湖北省武汉市汉阳区	武汉市汉阳区结核病防治所			2012-10-08 11	继发	病原学阴性		王长武	2012-10-08	新患者	初治	2012-11-12	2012-10-08							治疗	湖北省武汉市汉阳区	武汉市汉阳区二桥街社区卫生服务中心		完成疗程
		460	普通病案	湖北省武汉市东西湖区	东西湖区结核病防治所	湖北省武汉市东西湖区	东西湖区结核病防治所	420112019-2012-00184	460	17	女性	汉族	学生	本县区	420112008		转诊	2012-09-15	2012-09-26	11	阴性	2012-10-08	湖北省武汉市东西湖区	东西湖区结核病防治所	湖北省武汉市东西湖区	东西湖区结核病防治所			2012-10-08 15	继发	病原学阴性		孟刚	2012-10-08	新患者	初治		2012-10-08							治疗	湖北省武汉市东西湖区	东西湖区长青街卫生院		完成疗程
		461	普通病案	湖北省武汉市洪山区	洪山区疾病预防控制中心	湖北省武汉市洪山区	洪山区疾病预防控制中心	420111016-2012-00529	461	22	女性	汉族	学生	本县区	420111002		转诊	2012-08-22	2012-10-05	44	阴性	2012-10-08	湖北省武汉市洪山区	洪山区疾病预防控制中心	湖北省武汉市洪山区	洪山区疾病预防控制中心			2012-10-08 10	继发	病原学阳性		李仁惠	2012-10-08	新患者	初治		2012-10-08							治疗	湖北省武汉市洪山区	洪山区疾病预防控制中心		治愈
		462	普通病案	湖北省武汉市洪山区	洪山区疾病预防控制中心	湖北省武汉市洪山区	洪山区疾病预防控制中心	420111016-2012-00525	462	20	女性	汉族	学生	本县区	420111002		转诊	2012-09-05	2012-09-28	23	阴性	2012-10-08	湖北省武汉市洪山区	洪山区疾病预防控制中心	湖北省武汉市洪山区	洪山区疾病预防控制中心			2012-10-08 09	继发	病原学阴性		吴杰	2012-10-08	新患者	初治		2012-10-08							治疗	湖北省武汉市洪山区	洪山区疾病预防控制中心		完成疗程
		463	普通病案	湖北省武汉市洪山区	洪山区疾病预防控制中心	湖北省武汉市洪山区	洪山区疾病预防控制中心	420111016-2012-00523	463	20	男性	汉族	学生	本县区	420111006		转诊	2012-09-13	2012-09-21	8	阴性	2012-10-08	湖北省武汉市洪山区	洪山区疾病预防控制中心	湖北省武汉市洪山区	洪山区疾病预防控制中心			2012-10-08 09	继发	病原学阴性		吴杰	2012-10-08	新患者	初治		2012-10-08							治疗	湖北省武汉市洪山区	洪山区疾病预防控制中心		完成疗程
		464	普通病案	湖北省武汉市洪山区	洪山区疾病预防控制中心	湖北省武汉市洪山区	洪山区疾病预防控制中心	420111016-2012-00531	464	23	男性	汉族	学生	本县区	420111002		转诊	2012-09-16	2012-10-07	21	阴性	2012-10-08	湖北省武汉市洪山区	洪山区疾病预防控制中心	湖北省武汉市洪山区	洪山区疾病预防控制中心			2012-10-08 09	继发	病原学阴性		李仁惠	2012-10-08	新患者	初治		2012-10-08							治疗	湖北省武汉市洪山区	洪山区疾病预防控制中心		完成疗程
		465	普通病案	湖北省武汉市洪山区	洪山区疾病预防控制中心	湖北省武汉市洪山区	洪山区疾病预防控制中心	420111016-2012-00530	465	20	男性	汉族	学生	本县区	420111003		转诊	2012-09-23	2012-10-07	14	阴性	2012-10-08	湖北省武汉市洪山区	洪山区疾病预防控制中心	湖北省武汉市洪山区	洪山区疾病预防控制中心			2012-10-08 09	继发	病原学阴性		李仁惠	2012-10-08	新患者	初治		2012-10-08							治疗	湖北省武汉市洪山区	湖北工业大学医院		完成疗程
		466	普通病案	湖北省武汉市洪山区	洪山区疾病预防控制中心	湖北省武汉市洪山区	洪山区疾病预防控制中心	420111016-2012-00528	466	26	男性	汉族	学生	本县区	420111002		转诊	2012-09-29	2012-10-05	6	阴性	2012-10-08	湖北省武汉市洪山区	洪山区疾病预防控制中心	湖北省武汉市洪山区	洪山区疾病预防控制中心			2012-10-08 10	继发	病原学阴性		吴杰	2012-10-08	新患者	初治		2012-10-08							治疗	湖北省武汉市洪山区	洪山区关山街华中科技大学医院		完成疗程
		467	普通病案	湖北省武汉市洪山区	洪山区疾病预防控制中心	湖北省武汉市洪山区	洪山区疾病预防控制中心	420111016-2012-00524	467	24	男性	汉族	学生	本县区	420111001		转诊	2012-09-06	2012-09-28	22	阴性	2012-10-08	湖北省武汉市洪山区	洪山区疾病预防控制中心	湖北省武汉市洪山区	洪山区疾病预防控制中心			2012-10-08 09	继发	病原学阴性		李仁惠	2012-10-08	新患者	初治		2012-10-08							治疗	湖北省武汉市洪山区	洪山区珞南街理工大社区卫生服务中心		完成疗程
		468	普通病案	湖北省武汉市汉南区	武汉市汉南区疾病预防控制中心	湖北省武汉市汉南区	武汉市汉南区疾病预防控制中心	420113006-2012-00514	468	20	男性	汉族	学生	本县区	420113096		转诊	2012-07-20	2012-10-09	81	阴性	2012-07-27	湖北省武汉市汉南区	武汉市汉南区疾病预防控制中心	湖北省武汉市汉南区	武汉市汉南区疾病预防控制中心			2012-10-09 11	继发	病原学阴性		王刚	2012-10-09	新患者	初治		2012-10-09							治疗	湖北省武汉市汉南区	武汉市汉南区疾病预防控制中心		完成疗程
		469	普通病案	湖北省武汉市江夏区	武汉市江夏区疾病预防控制中心	湖北省武汉市江夏区	武汉市江夏区疾病预防控制中心	420115008-2012-00498	469	15	男性	汉族	学生	本县区	420115001		追踪	2012-07-25	2012-10-09	76			湖北省武汉市江夏区	武汉市江夏区疾病预防控制中心	湖北省武汉市江夏区	武汉市江夏区疾病预防控制中心			2012-10-10 00	继发	病原学阴性		艾医生	2012-10-10	新患者	初治		2012-10-10							治疗	湖北省武汉市江夏区	武汉市江夏区纸坊社区卫生服务中心		完成疗程
		470	普通病案	湖北省武汉市洪山区	洪山区疾病预防控制中心	湖北省武汉市洪山区	洪山区疾病预防控制中心	420111016-2012-00533	470	23	男性	汉族	学生	本县区	420111005		转诊	2012-09-27	2012-10-07	10	阴性	2012-10-10	湖北省武汉市洪山区	洪山区疾病预防控制中心	湖北省武汉市洪山区	洪山区疾病预防控制中心			2012-10-10 14	继发	病原学阳性		吴杰	2012-10-10	新患者	初治		2012-10-10							治疗	湖北省武汉市洪山区	洪山区和平街社区卫生服务中心		治愈
		471	普通病案	湖北省武汉市洪山区	洪山区疾病预防控制中心	湖北省武汉市洪山区	洪山区疾病预防控制中心	420111016-2012-00538	471	18	男性	汉族	学生	本县区	420111001		转诊	2012-08-29	2012-09-11	13	阴性	2012-10-10	湖北省武汉市洪山区	洪山区疾病预防控制中心	湖北省武汉市洪山区	洪山区疾病预防控制中心			2012-10-10 14	继发	病原学阳性		吴杰	2012-10-10	新患者	初治		2012-10-10							治疗	湖北省武汉市洪山区	武汉市洪山区中医医院		治愈
		472	普通病案	湖北省武汉市洪山区	洪山区疾病预防控制中心	湖北省武汉市洪山区	洪山区疾病预防控制中心	420111016-2012-00540	472	18	女性	汉族	学生	本县区	420111002		直接就诊	2012-09-11	2012-10-08	27	阴性	2012-10-10	湖北省武汉市洪山区	洪山区疾病预防控制中心	湖北省武汉市洪山区	洪山区疾病预防控制中心			2012-10-10 15	继发	病原学阴性		吴杰	2012-10-10	新患者	初治		2012-10-10							治疗	湖北省武汉市洪山区	洪山区疾病预防控制中心		完成疗程
		473	普通病案	湖北省武汉市洪山区	洪山区疾病预防控制中心	湖北省武汉市洪山区	洪山区疾病预防控制中心	420111016-2012-00534	473	20	男性	汉族	学生	本县区	420111003		转诊	2012-10-06	2012-10-08	2	阴性	2012-10-10	湖北省武汉市洪山区	洪山区疾病预防控制中心	湖北省武汉市洪山区	洪山区疾病预防控制中心			2012-10-10 09	继发	病原学阴性		李仁惠	2012-10-10	新患者	初治		2012-10-10							治疗	湖北省武汉市洪山区	湖北工业大学医院		完成疗程
		474	普通病案	湖北省武汉市洪山区	洪山区疾病预防控制中心	湖北省武汉市洪山区	洪山区疾病预防控制中心	420111016-2012-00537	474	18	女性	汉族	学生	本县区	420111002		转诊	2012-10-06	2012-10-08	2	阴性	2012-10-10	湖北省武汉市洪山区	洪山区疾病预防控制中心	湖北省武汉市洪山区	洪山区疾病预防控制中心			2012-10-10 15	继发	病原学阴性		李仁惠	2012-10-10	新患者	初治		2012-10-10							治疗	湖北省武汉市洪山区	武汉市第三医院光谷院区		完成疗程
		475	普通病案	湖北省武汉市武昌区	武昌区疾病预防控制中心	湖北省武汉市武昌区	武昌区疾病预防控制中心	420106010-2012-00553	475	18	男性	汉族	学生	本县区	420106011		直接就诊	2012-10-08	2012-10-12	4	阴性	2012-10-12	湖北省武汉市武昌区	武昌区疾病预防控制中心	湖北省武汉市武昌区	武昌区疾病预防控制中心			2012-10-12 09	继发	病原学阴性		刘文	2012-10-12	新患者	初治		2012-10-12							治疗				完成疗程
		476	普通病案	湖北省武汉市江夏区	武汉市江夏区疾病预防控制中心	湖北省武汉市江夏区	武汉市江夏区疾病预防控制中心	420115008-2012-00504	476	19	男性	汉族	学生	本县区	420115010		追踪	2012-09-14	2012-10-11	27			湖北省武汉市江夏区	武汉市江夏区疾病预防控制中心	湖北省武汉市江夏区	武汉市江夏区疾病预防控制中心			2012-10-12 14	继发	病原学阳性		艾医生	2012-10-12	新患者	初治		2012-10-12							治疗	湖北省武汉市江夏区	藏龙岛经院社区卫生服务中心		治愈
		477	普通病案	湖北省武汉市江夏区	武汉市江夏区疾病预防控制中心	湖北省武汉市江夏区	武汉市江夏区疾病预防控制中心	420115008-2012-00506	477	20	男性	汉族	学生	本县区	420115010		转诊	2012-09-08	2012-10-11	33			湖北省武汉市江夏区	武汉市江夏区疾病预防控制中心	湖北省武汉市江夏区	武汉市江夏区疾病预防控制中心			2012-10-12 00	继发	病原学阴性		艾医生	2012-10-12	新患者	初治		2012-10-12							治疗	湖北省武汉市江夏区	藏龙岛经院社区卫生服务中心		完成疗程
		478	普通病案	湖北省武汉市江夏区	武汉市江夏区疾病预防控制中心	湖北省武汉市江夏区	武汉市江夏区疾病预防控制中心	420115008-2012-00505	478	18	女性	汉族	学生	本县区	420115010		转诊	2012-09-13	2012-10-11	28			湖北省武汉市江夏区	武汉市江夏区疾病预防控制中心	湖北省武汉市江夏区	武汉市江夏区疾病预防控制中心			2012-10-12 14	继发	病原学阴性		艾医生	2012-10-12	新患者	初治		2012-10-12							治疗	湖北省武汉市江夏区	藏龙岛经院社区卫生服务中心		完成疗程
		479	普通病案	湖北省武汉市洪山区	洪山区疾病预防控制中心	湖北省武汉市洪山区	洪山区疾病预防控制中心	420111016-2012-00548	479	18	女性	汉族	学生	本县区	420111002		转诊	2012-09-13	2012-09-23	10	阴性	2012-10-12	湖北省武汉市洪山区	洪山区疾病预防控制中心	湖北省武汉市洪山区	洪山区疾病预防控制中心			2012-10-12 15	继发	病原学阴性		吴杰	2012-10-12	新患者	初治		2012-10-12							治疗	湖北省武汉市洪山区	洪山区疾病预防控制中心		完成疗程
		480	普通病案	湖北省武汉市洪山区	洪山区疾病预防控制中心	湖北省武汉市洪山区	洪山区疾病预防控制中心	420111016-2012-00542	480	20	男性	汉族	学生	本县区	420111002		追踪	2012-09-12	2012-09-27	15	阴性	2012-10-12	湖北省武汉市洪山区	洪山区疾病预防控制中心	湖北省武汉市洪山区	洪山区疾病预防控制中心			2012-10-12 09	继发	病原学阴性		李仁惠	2012-10-12	新患者	初治		2012-10-12							治疗	湖北省武汉市洪山区	洪山区关山街华中科技大学医院		完成疗程
		481	普通病案	湖北省武汉市洪山区	洪山区疾病预防控制中心	湖北省武汉市洪山区	洪山区疾病预防控制中心	420111016-2012-00541	481	19	男性	汉族	学生	本县区	420111001		转诊	2012-09-26	2012-09-28	2	阴性	2012-10-12	湖北省武汉市洪山区	洪山区疾病预防控制中心	湖北省武汉市洪山区	洪山区疾病预防控制中心			2012-10-12 09	继发	病原学阴性		吴杰	2012-10-12	新患者	初治		2012-10-12							治疗	湖北省武汉市洪山区	洪山区疾病预防控制中心		完成疗程
		482	普通病案	湖北省武汉市江夏区	武汉市江夏区疾病预防控制中心	湖北省武汉市江夏区	武汉市江夏区疾病预防控制中心	420115008-2012-00510	482	20	男性	汉族	学生	本县区	420115010		追踪	2012-09-16	2012-10-14	28			湖北省武汉市江夏区	武汉市江夏区疾病预防控制中心	湖北省武汉市江夏区	武汉市江夏区疾病预防控制中心			2012-10-15 15	继发	病原学阴性		艾医生	2012-10-15	新患者	初治		2012-10-15							治疗	湖北省武汉市江夏区	武汉市江夏区五里界社区卫生服务中心		完成疗程
		483	普通病案	湖北省武汉市洪山区	洪山区疾病预防控制中心	湖北省武汉市洪山区	洪山区疾病预防控制中心	420111016-2012-00549	483	24	女性	汉族	学生	本县区	420111002		转诊	2012-09-15	2012-09-28	13	阴性	2012-10-15	湖北省宜昌市秭归县	秭归县疾病预防控制中心	湖北省宜昌市秭归县	秭归县疾病预防控制中心			2012-10-15 09	继发	病原学阴性		吴杰	2012-10-15	新患者	初治		2012-10-15							治疗	湖北省宜昌市秭归县	秭归县屈原镇卫生院		完成疗程
		484	普通病案	湖北省武汉市洪山区	洪山区疾病预防控制中心	湖北省武汉市洪山区	洪山区疾病预防控制中心	420111016-2012-00550	484	19	男性	汉族	学生	本县区	420111002		转诊	2012-10-06	2012-10-10	4	阴性	2012-10-15	湖北省武汉市洪山区	洪山区疾病预防控制中心	湖北省武汉市洪山区	洪山区疾病预防控制中心			2012-10-15 08	继发	病原学阳性		李仁惠	2012-10-15	新患者	初治		2012-10-15							治疗	湖北省武汉市洪山区	武汉市第三医院光谷院区		治愈
		485	普通病案	湖北省武汉市洪山区	洪山区疾病预防控制中心	湖北省武汉市洪山区	洪山区疾病预防控制中心	420111016-2012-00553	485	18	女性	汉族	学生	本县区	420111011		转诊	2012-10-09	2012-10-13	4	阴性	2012-10-15	湖北省武汉市洪山区	洪山区疾病预防控制中心	湖北省武汉市洪山区	洪山区疾病预防控制中心			2012-10-15 09	继发	病原学阴性		李仁惠	2012-10-15	新患者	初治		2012-10-15							治疗	湖北省武汉市洪山区	武汉市洪山区张家湾街社区卫生中心		完成疗程
		486	普通病案	湖北省武汉市汉阳区	武汉市汉阳区结核病防治所	湖北省武汉市汉阳区	武汉市汉阳区结核病防治所	420105012-2012-00301	486	18	男性	汉族	学生	本市其它县区	420105004		转诊	2012-09-14	2012-09-15	1	阴性	2012-09-16	湖北省武汉市汉阳区	武汉市汉阳区结核病防治所	湖北省武汉市汉阳区	武汉市汉阳区结核病防治所			2012-10-16 13	继发	病原学阴性		周利	2012-10-16	新患者	初治	2012-11-16	2012-10-16							治疗	湖北省武汉市汉阳区	汉阳区晴川街社区卫生服务中心		完成疗程
		487	普通病案	湖北省武汉市汉阳区	武汉市汉阳区结核病防治所	湖北省武汉市汉阳区	武汉市汉阳区结核病防治所	420105012-2012-00302	487	18	女性	汉族	学生	本市其它县区	420105004		转诊	2012-09-21	2012-09-22	1	阴性	2012-10-06	湖北省武汉市汉阳区	武汉市汉阳区结核病防治所	湖北省武汉市汉阳区	武汉市汉阳区结核病防治所			2012-10-16 13	继发	病原学阴性		周利	2012-10-16	新患者	初治	2012-12-06	2012-10-16							治疗	湖北省武汉市汉阳区	汉阳区晴川街社区卫生服务中心		完成疗程
		488	普通病案	湖北省武汉市汉阳区	武汉市汉阳区结核病防治所	湖北省武汉市汉阳区	武汉市汉阳区结核病防治所	420105012-2012-00296	488	17	男性	汉族	学生	本县区	420105010		转诊	2012-09-15	2012-09-21	6	阴性	2012-10-16	湖北省武汉市汉阳区	武汉市汉阳区结核病防治所	湖北省武汉市汉阳区	武汉市汉阳区结核病防治所			2012-10-16 09	继发	病原学阴性		朱建	2012-10-16	新患者	初治	2012-12-14	2012-10-16							治疗	湖北省武汉市汉阳区	汉阳区永丰街社区卫生服务中心		完成疗程
		489	普通病案	湖北省武汉市江夏区	武汉市江夏区疾病预防控制中心	湖北省武汉市江夏区	武汉市江夏区疾病预防控制中心	420115008-2012-00518	489	17	男性	汉族	学生	本县区	420115005		转诊	2012-09-25	2012-10-16	21			湖北省武汉市江夏区	武汉市江夏区疾病预防控制中心	湖北省武汉市江夏区	武汉市江夏区疾病预防控制中心			2012-10-17 14	继发	病原学阴性		艾医生	2012-10-17	新患者	初治		2012-10-17							治疗	湖北省武汉市江夏区	武汉市江夏区郑店社区卫生服务中心		完成疗程
		490	普通病案	湖北省武汉市青山区	青山区结核病防治所	湖北省武汉市青山区	青山区结核病防治所	420107018-2012-00264	490	22	男性	汉族	学生	本市其它县区	420107006		追踪	2012-09-08	2012-09-20	12			湖北省武汉市青山区	青山区结核病防治所	湖北省武汉市青山区	青山区结核病防治所			2012-10-17 10	继发	病原学阴性		郑和平	2012-10-17	新患者	初治		2012-10-17							治疗	湖北省武汉市青山区	青山区结核病防治所		完成疗程
		491	普通病案	湖北省武汉市洪山区	洪山区疾病预防控制中心	湖北省武汉市洪山区	洪山区疾病预防控制中心	420111016-2012-00555	491	20	女性	汉族	学生	本县区	420111002		转诊	2012-09-14	2012-09-29	15	阴性	2012-10-17	湖北省武汉市洪山区	洪山区疾病预防控制中心	湖北省武汉市洪山区	洪山区疾病预防控制中心			2012-10-17 08	继发	病原学阴性		吴杰	2012-10-17	新患者	初治		2012-10-17							治疗	湖北省武汉市洪山区	洪山区疾病预防控制中心		完成疗程
		492	普通病案	湖北省武汉市江夏区	武汉市江夏区疾病预防控制中心	湖北省武汉市江夏区	武汉市江夏区疾病预防控制中心	420115008-2012-00517	492	21	男性	汉族	学生	本县区	420115001		转诊	2012-09-04	2012-10-17	43			湖北省武汉市江夏区	武汉市江夏区疾病预防控制中心	湖北省武汉市江夏区	武汉市江夏区疾病预防控制中心			2012-10-18 09	继发	病原学阴性		熊医生	2012-10-18	新患者	初治		2012-10-18							治疗	湖北省武汉市江夏区	武汉市江夏区纸坊社区卫生服务中心		完成疗程
		493	普通病案	湖北省武汉市东西湖区	东西湖区结核病防治所	湖北省武汉市东西湖区	东西湖区结核病防治所	420112019-2012-00189	493	16	女性	汉族	学生	本县区	420112400		转诊	2012-09-01	2012-09-24	23	阴性	2012-10-18	湖北省武汉市东西湖区	东西湖区结核病防治所	湖北省武汉市东西湖区	东西湖区结核病防治所			2012-10-18 09	继发	病原学阳性		胡才生	2012-10-18	新患者	初治		2012-10-18							治疗	湖北省武汉市东西湖区	常青花园社区卫生服务中心		治愈
		494	普通病案	湖北省武汉市汉阳区	武汉市汉阳区结核病防治所	湖北省武汉市汉阳区	武汉市汉阳区结核病防治所	420105012-2012-00303	494	19	男性	汉族	学生	本县区	420105004		直接就诊	2012-09-04	2012-09-21	17	阴性	2012-10-04	湖北省武汉市汉阳区	武汉市汉阳区结核病防治所	湖北省武汉市汉阳区	武汉市汉阳区结核病防治所			2012-10-19 09	继发	病原学阴性		朱建	2012-10-19	新患者	初治	2012-12-04	2012-10-19							治疗	湖北省武汉市汉阳区	汉阳区晴川街社区卫生服务中心		完成疗程
		495	普通病案	湖北省武汉市汉南区	武汉市汉南区疾病预防控制中心	湖北省武汉市汉南区	武汉市汉南区疾病预防控制中心	420113006-2012-00515	495	22	男性	汉族	学生	本市其它县区	420113096		转诊	2012-09-10	2012-10-19	39			湖北省武汉市汉南区	武汉市汉南区疾病预防控制中心	湖北省武汉市汉南区	武汉市汉南区疾病预防控制中心			2012-10-19 08	继发	病原学阴性		王刚	2012-10-19	新患者	初治		2012-10-19							治疗	湖北省武汉市汉南区	武汉市汉南区疾病预防控制中心		完成疗程
		496	普通病案	湖北省武汉市洪山区	洪山区疾病预防控制中心	湖北省武汉市洪山区	洪山区疾病预防控制中心	420111016-2012-00558	496	21	男性	汉族	学生	本县区	420111003		转诊	2012-10-05	2012-10-15	10	阴性	2012-10-19	湖北省武汉市洪山区	洪山区疾病预防控制中心	湖北省武汉市洪山区	洪山区疾病预防控制中心			2012-10-19 10	继发	病原学阴性		吴杰	2012-10-19	新患者	初治		2012-10-19							治疗	湖北省武汉市洪山区	湖北工业大学医院		完成疗程
		497	普通病案	湖北省武汉市江岸区	江岸区疾病预防控制中心	湖北省武汉市江岸区	江岸区疾病预防控制中心	420102000-2012-00427	497	18	女性	汉族	学生	本市其它县区	420102014		转诊	2012-09-11	2012-09-29	18	阴性	2012-09-29	湖北省武汉市江岸区	江岸区疾病预防控制中心	湖北省武汉市江岸区	江岸区疾病预防控制中心			2012-10-22 14	继发	病原学阳性		罗艺	2012-10-22	新患者	初治		2012-10-22							治疗	湖北省武汉市江岸区	江岸区台北街社区卫生服务中心		治愈
		498	普通病案	湖北省武汉市洪山区	洪山区疾病预防控制中心	湖北省武汉市洪山区	洪山区疾病预防控制中心	420111016-2012-00561	498	23	女性	汉族	学生	本县区	420111002		转诊	2012-10-11	2012-10-17	6	阴性	2012-10-22	湖北省武汉市洪山区	洪山区疾病预防控制中心	湖北省武汉市洪山区	洪山区疾病预防控制中心			2012-10-22 10	继发	病原学阴性		吴杰	2012-10-22	新患者	初治		2012-10-22							治疗	湖北省武汉市洪山区	洪山区疾病预防控制中心		完成疗程
		499	普通病案	湖北省武汉市洪山区	洪山区疾病预防控制中心	湖北省武汉市洪山区	洪山区疾病预防控制中心	420111016-2012-00560	499	24	女性	汉族	学生	本县区	420111002		转诊	2012-09-18	2012-10-20	32	阴性	2012-10-22	湖北省武汉市洪山区	洪山区疾病预防控制中心	湖北省武汉市洪山区	洪山区疾病预防控制中心			2012-10-22 09	继发	病原学阴性		李仁惠	2012-10-22	新患者	初治		2012-10-22							治疗	湖北省武汉市洪山区	洪山区疾病预防控制中心		完成疗程
		500	普通病案	湖北省武汉市洪山区	洪山区疾病预防控制中心	湖北省武汉市洪山区	洪山区疾病预防控制中心	420111016-2012-00559	500	19	女性	汉族	学生	本县区	420111006		转诊	2012-09-13	2012-09-23	10	阴性	2012-10-22	湖北省武汉市洪山区	洪山区疾病预防控制中心	湖北省武汉市洪山区	洪山区疾病预防控制中心			2012-10-22 09	继发	病原学阴性		吴杰	2012-10-22	新患者	初治		2012-10-22							治疗	湖北省武汉市洪山区	洪山区疾病预防控制中心		完成疗程
		501	普通病案	湖北省武汉市洪山区	洪山区疾病预防控制中心	湖北省武汉市洪山区	洪山区疾病预防控制中心	420111016-2012-00562	501	19	女性	汉族	学生	本县区	420111003		转诊	2012-08-21	2012-09-11	21	阴性	2012-10-23	湖北省武汉市洪山区	洪山区疾病预防控制中心	湖北省武汉市洪山区	洪山区疾病预防控制中心			2012-10-23 08	继发	病原学阴性		吴杰	2012-10-23	新患者	初治		2012-10-23							治疗	湖北省武汉市洪山区	湖北工业大学医院		完成疗程
		502	普通病案	湖北省武汉市洪山区	洪山区疾病预防控制中心	湖北省武汉市洪山区	洪山区疾病预防控制中心	420111016-2012-00565	502	21	男性	汉族	学生	本县区	420111006		转诊	2012-10-07	2012-10-22	15	阴性	2012-10-23	湖北省武汉市洪山区	洪山区疾病预防控制中心	湖北省武汉市洪山区	洪山区疾病预防控制中心			2012-10-23 08	继发	病原学阳性		李仁惠	2012-10-23	新患者	初治		2012-10-23							治疗	湖北省武汉市洪山区	洪山区疾病预防控制中心		治愈
		503	普通病案	湖北省武汉市黄陂区	武汉市黄陂区疾病预防控制中心	湖北省武汉市黄陂区	武汉市黄陂区疾病预防控制中心	420116003-2012-00728	503	19	女性	汉族	学生	本市其它县区	420116201		追踪	2012-09-08	2012-10-24	46			湖北省武汉市黄陂区	武汉市黄陂区疾病预防控制中心	湖北省武汉市黄陂区	武汉市黄陂区疾病预防控制中心			2012-10-24 08	继发	病原学阴性		汪亮	2012-10-24	新患者	初治		2012-10-24							治疗	湖北省武汉市黄陂区	武汉市黄陂区木兰乡卫生院		完成疗程
		504	普通病案	湖北省武汉市江夏区	武汉市江夏区疾病预防控制中心	湖北省武汉市江夏区	武汉市江夏区疾病预防控制中心	420115008-2012-00536	504	23	女性	汉族	学生	本县区	420115010		转诊	2012-08-16	2012-10-23	68			湖北省武汉市江夏区	武汉市江夏区疾病预防控制中心	湖北省武汉市江夏区	武汉市江夏区疾病预防控制中心			2012-10-24 16	继发	病原学阴性		熊医生	2012-10-24	新患者	初治		2012-10-24							治疗	湖北省武汉市江夏区	藏龙岛经院社区卫生服务中心		完成疗程
		505	普通病案	湖北省武汉市江岸区	江岸区疾病预防控制中心	湖北省武汉市江岸区	江岸区疾病预防控制中心	420102000-2012-00434	505	16	男性	汉族	学生	本市其它县区	420102014		转诊	2012-09-11	2012-10-11	30	阴性	2012-10-11	湖北省武汉市江岸区	江岸区疾病预防控制中心	湖北省武汉市江岸区	江岸区疾病预防控制中心			2012-10-25 14	继发	病原学阴性		罗艺	2012-10-25	新患者	初治		2012-10-25							治疗	湖北省武汉市江岸区	江岸区台北街社区卫生服务中心		完成疗程
		506	普通病案	湖北省武汉市汉阳区	武汉市汉阳区结核病防治所	湖北省武汉市汉阳区	武汉市汉阳区结核病防治所	420105012-2012-00310	506	19	男性	汉族	学生	本县区	420105004		转诊	2012-10-09	2012-10-16	7	阴性	2012-10-23	湖北省武汉市汉阳区	武汉市汉阳区结核病防治所	湖北省武汉市汉阳区	武汉市汉阳区结核病防治所			2012-10-26 11	继发	病原学阴性		周震	2012-10-26	新患者	初治	2012-12-24	2012-10-26							治疗	湖北省武汉市汉阳区	汉阳区晴川街社区卫生服务中心		完成疗程
		507	普通病案	湖北省武汉市蔡甸区	武汉市蔡甸区疾病预防控制中心	湖北省武汉市蔡甸区	武汉市蔡甸区疾病预防控制中心	420114003-2012-00379	507	21	男性	汉族	学生	本市其它县区	420114004		转诊	2012-10-19	2012-10-29	10	阴性	2012-10-29	湖北省武汉市蔡甸区	武汉市蔡甸区疾病预防控制中心	湖北省武汉市蔡甸区	武汉市蔡甸区疾病预防控制中心			2012-10-29 14	继发	病原学阳性		刘晓燕	2012-10-29	新患者	初治		2012-10-29							治疗	湖北省武汉市蔡甸区	武汉市蔡甸区侏儒街卫生院		治愈
		508	普通病案	湖北省武汉市洪山区	洪山区疾病预防控制中心	湖北省武汉市洪山区	洪山区疾病预防控制中心	420111016-2012-00567	508	16	男性	汉族	学生	本县区	420111002		转诊	2012-09-21	2012-10-24	33	阴性	2012-10-29	湖北省武汉市洪山区	洪山区疾病预防控制中心	湖北省武汉市洪山区	洪山区疾病预防控制中心			2012-10-29 08	继发	病原学阴性		李仁惠	2012-10-29	新患者	初治		2012-10-29							治疗	湖北省武汉市洪山区	武汉市第三医院光谷院区		完成疗程
		509	普通病案	湖北省武汉市洪山区	洪山区疾病预防控制中心	湖北省武汉市洪山区	洪山区疾病预防控制中心	420111016-2012-00569	509	20	男性	汉族	学生	本县区	420111001		转诊	2012-10-09	2012-10-24	15	阴性	2012-10-29	湖北省武汉市洪山区	洪山区疾病预防控制中心	湖北省武汉市洪山区	洪山区疾病预防控制中心			2012-10-29 09	继发	病原学阴性		吴杰	2012-10-29	新患者	初治		2012-10-29							治疗	湖北省武汉市洪山区	洪山区珞南街理工大社区卫生服务中心		完成疗程
		510	普通病案	湖北省武汉市洪山区	洪山区疾病预防控制中心	湖北省武汉市洪山区	洪山区疾病预防控制中心	420111016-2012-00573	510	20	男性	汉族	学生	本县区	420111002		转诊	2012-10-18	2012-10-27	9	阴性	2012-10-29	湖北省武汉市洪山区	洪山区疾病预防控制中心	湖北省武汉市洪山区	洪山区疾病预防控制中心			2012-10-29 08	继发	病原学阴性		吴杰	2012-10-29	新患者	初治		2012-10-29							治疗	湖北省武汉市洪山区	洪山区关山街华中科技大学医院		完成疗程
		511	普通病案	湖北省武汉市洪山区	洪山区疾病预防控制中心	湖北省武汉市洪山区	洪山区疾病预防控制中心	420111016-2012-00574	511	21	男性	汉族	学生	本县区	420111002		转诊	2012-10-21	2012-10-27	6	阴性	2012-10-29	湖北省武汉市洪山区	洪山区疾病预防控制中心	湖北省武汉市洪山区	洪山区疾病预防控制中心			2012-10-29 08	继发	病原学阴性		吴杰	2012-10-29	新患者	初治		2012-10-29							治疗	湖北省武汉市洪山区	洪山区疾病预防控制中心		完成疗程
		512	普通病案	湖北省武汉市洪山区	洪山区疾病预防控制中心	湖北省武汉市洪山区	洪山区疾病预防控制中心	420111016-2012-00572	512	22	男性	汉族	学生	本县区	420111011		转诊	2012-10-20	2012-10-25	5	阴性	2012-10-29	湖北省武汉市洪山区	洪山区疾病预防控制中心	湖北省武汉市洪山区	洪山区疾病预防控制中心			2012-10-29 09	继发	病原学阳性		李仁惠	2012-10-29	新患者	初治		2012-10-29							治疗	湖北省武汉市洪山区	武汉市洪山区张家湾街社区卫生中心		治愈
		513	普通病案	湖北省武汉市洪山区	洪山区疾病预防控制中心	湖北省武汉市洪山区	洪山区疾病预防控制中心	420111016-2012-00568	513	20	男性	汉族	学生	本县区	420111003		转诊	2012-09-28	2012-10-24	26	阴性	2012-10-29	湖北省武汉市洪山区	洪山区疾病预防控制中心	湖北省武汉市洪山区	洪山区疾病预防控制中心			2012-10-29 08	继发	病原学阴性		吴杰	2012-10-29	新患者	初治		2012-10-29							治疗	湖北省武汉市洪山区	洪山区狮子山街华中农业大学医院		完成疗程
		514	普通病案	湖北省武汉市东湖高新技术开发区	武汉东湖新技术开发区佛祖岭社区卫生服务中心	湖北省武汉市东湖高新技术开发区	武汉东湖新技术开发区佛祖岭社区卫生服务中心	420192011-2012-01061	514	16	男性	汉族	学生	本市其它县区	420192002		追踪	2012-08-27	2012-10-30	64			湖北省武汉市东湖高新技术开发区	武汉东湖新技术开发区佛祖岭社区卫生服务中心	湖北省武汉市东湖高新技术开发区	武汉东湖新技术开发区佛祖岭社区卫生服务中心			2012-10-30 10	继发	病原学阴性		辛善志	2012-10-30	新患者	初治		2012-10-30							治疗	湖北省武汉市东湖高新技术开发区	武汉东湖新技术开发区佛祖岭社区卫生服务中心		完成疗程
		515	普通病案	湖北省武汉市武昌区	武昌区疾病预防控制中心	湖北省武汉市武昌区	武昌区疾病预防控制中心	420106010-2012-00589	515	19	男性	汉族	学生	本县区	420106009		直接就诊	2012-10-28	2012-10-30	2	阴性	2012-10-30	湖北省武汉市武昌区	武昌区疾病预防控制中心	湖北省武汉市武昌区	武昌区疾病预防控制中心			2012-10-30 14	继发	病原学阴性		刘文	2012-10-30	新患者	初治		2012-10-30							治疗				完成疗程
		516	普通病案	湖北省武汉市武昌区	武昌区疾病预防控制中心	湖北省武汉市武昌区	武昌区疾病预防控制中心	420106010-2012-00583	516	19	男性	汉族	学生	本县区	420106013		转诊	2012-10-16	2012-10-22	6	阴性	2012-10-30	湖北省武汉市武昌区	武昌区疾病预防控制中心	湖北省武汉市武昌区	武昌区疾病预防控制中心			2012-10-30 11	继发	病原学阴性		刘文	2012-10-30	新患者	初治		2012-10-30							治疗				完成疗程
		517	普通病案	湖北省武汉市江夏区	武汉市江夏区疾病预防控制中心	湖北省武汉市江夏区	武汉市江夏区疾病预防控制中心	420115008-2012-00545	517	19	女性	汉族	学生	本县区	420115010		追踪	2012-09-07	2012-10-29	52			湖北省武汉市江夏区	武汉市江夏区疾病预防控制中心	湖北省武汉市江夏区	武汉市江夏区疾病预防控制中心			2012-10-30 14	继发	病原学阴性		艾医生	2012-10-30	新患者	初治		2012-10-30							治疗	湖北省武汉市江夏区	藏龙岛经院社区卫生服务中心		完成疗程
		518	普通病案	湖北省武汉市武昌区	武昌区疾病预防控制中心	湖北省武汉市武昌区	武昌区疾病预防控制中心	420106010-2012-00593	518	20	男性	汉族	学生	本县区	420106003		转诊	2012-10-17	2012-10-31	14	阴性	2012-11-01	湖北省武汉市武昌区	武昌区疾病预防控制中心	湖北省武汉市武昌区	武昌区疾病预防控制中心			2012-11-01 10	继发	病原学阳性		刘文	2012-11-01	新患者	初治		2012-11-01							治疗				治愈
		519	普通病案	湖北省武汉市汉阳区	武汉市汉阳区结核病防治所	湖北省武汉市汉阳区	武汉市汉阳区结核病防治所	420105012-2012-00319	519	16	男性	汉族	学生	本县区	420105004		健康体检	2012-10-11	2012-10-16	5	阴性	2012-11-01	湖北省武汉市汉阳区	武汉市汉阳区结核病防治所	湖北省武汉市汉阳区	武汉市汉阳区结核病防治所			2012-11-01 11	继发	病原学阴性		王长武	2012-11-01	新患者	初治	2012-12-31	2012-11-01							治疗	湖北省武汉市汉阳区	汉阳区晴川街社区卫生服务中心		完成疗程
		520	普通病案	湖北省武汉市汉阳区	武汉市汉阳区结核病防治所	湖北省武汉市汉阳区	武汉市汉阳区结核病防治所	420105012-2012-00315	520	19	男性	汉族	学生	本县区	420105004		健康体检	2012-09-11	2012-09-21	10	阴性	2012-10-30	湖北省武汉市汉阳区	武汉市汉阳区结核病防治所	湖北省武汉市汉阳区	武汉市汉阳区结核病防治所			2012-11-01 11	继发	病原学阴性		周震	2012-11-01	新患者	初治	2012-12-28	2012-11-01							治疗	湖北省武汉市汉阳区	汉阳区晴川街社区卫生服务中心		完成疗程
		521	普通病案	湖北省武汉市硚口区	武汉市结核病防治所	湖北省武汉市硚口区	武汉市结核病防治所	420104019-2012-00464	521	20	男性	汉族	学生	本县区	420104002		转诊	2012-10-03	2012-10-31	28	阴性	2012-11-02	湖北省武汉市硚口区	武汉市结核病防治所	湖北省武汉市硚口区	武汉市结核病防治所			2012-11-01 09	继发	病原学阴性		李春清	2012-11-01	新患者	初治		2012-11-01							治疗	湖北省武汉市硚口区	武汉市结核病防治所		完成疗程
		522	普通病案	湖北省武汉市洪山区	洪山区疾病预防控制中心	湖北省武汉市洪山区	洪山区疾病预防控制中心	420111016-2012-00580	522	20	女性	汉族	学生	本县区	420111002		转诊	2012-10-25	2012-10-30	5	阴性	2012-11-01	湖北省武汉市洪山区	洪山区疾病预防控制中心	湖北省武汉市洪山区	洪山区疾病预防控制中心			2012-11-01 08	继发	病原学阴性		吴杰	2012-11-01	新患者	初治		2012-11-01							治疗	湖北省武汉市洪山区	洪山区疾病预防控制中心		完成疗程
		523	普通病案	湖北省武汉市洪山区	洪山区疾病预防控制中心	湖北省武汉市洪山区	洪山区疾病预防控制中心	420111016-2012-00575	523	20	男性	汉族	学生	本县区	420111002		转诊	2012-10-01	2012-10-16	15	阴性	2012-11-01	湖北省武汉市洪山区	洪山区疾病预防控制中心	湖北省武汉市洪山区	洪山区疾病预防控制中心			2012-11-01 08	继发	病原学阴性		吴杰	2012-11-01	新患者	初治		2012-11-01							治疗	湖北省武汉市洪山区	洪山区关山街华中科技大学医院		完成疗程
		524	普通病案	湖北省武汉市洪山区	洪山区疾病预防控制中心	湖北省武汉市洪山区	洪山区疾病预防控制中心	420111016-2012-00581	524	26	男性	汉族	学生	本县区	420111002		转诊	2012-10-24	2012-10-29	5	阴性	2012-11-01	湖北省武汉市洪山区	洪山区疾病预防控制中心	湖北省武汉市洪山区	洪山区疾病预防控制中心			2012-11-01 08	继发	病原学阴性		李仁惠	2012-11-01	新患者	初治		2012-11-01							治疗	湖北省武汉市洪山区	中国地质大学医院		完成疗程
		525	普通病案	湖北省武汉市洪山区	洪山区疾病预防控制中心	湖北省武汉市洪山区	洪山区疾病预防控制中心	420111016-2012-00577	525	22	男性	汉族	学生	本县区	420111002		转诊	2012-07-16	2012-10-27	103	阴性	2012-11-01	湖北省武汉市洪山区	洪山区疾病预防控制中心	湖北省武汉市洪山区	洪山区疾病预防控制中心			2012-11-01 08	继发	病原学阴性		李仁惠	2012-11-01	新患者	初治		2012-11-01							治疗	湖北省武汉市洪山区	洪山区疾病预防控制中心		完成疗程
		526	普通病案	湖北省武汉市江汉区	武汉市江汉区疾病预防控制中心	湖北省武汉市江汉区	武汉市江汉区疾病预防控制中心	420103013-2012-00349	526	17	男性	汉族	学生	本县区	420103012		追踪	2012-10-22	2012-10-27	5	阴性	2012-10-12	湖北省武汉市江汉区	武汉市江汉区疾病预防控制中心	湖北省武汉市江汉区	武汉市江汉区疾病预防控制中心			2012-11-05 09	继发	病原学阴性		连展	2012-11-05	新患者	初治		2012-11-05							治疗	湖北省武汉市江汉区	江汉区常青街社区卫生服务中心		完成疗程
		527	普通病案	湖北省武汉市东湖高新技术开发区	武汉东湖新技术开发区佛祖岭社区卫生服务中心	湖北省武汉市东湖高新技术开发区	武汉东湖新技术开发区佛祖岭社区卫生服务中心	420192011-2012-01065	527	19	男性	汉族	学生	本县区	420192002		直接就诊	2012-10-23	2012-11-06	14			湖北省武汉市东湖高新技术开发区	武汉东湖新技术开发区佛祖岭社区卫生服务中心	湖北省武汉市东湖高新技术开发区	武汉东湖新技术开发区佛祖岭社区卫生服务中心			2012-11-06 16	继发	病原学阴性		辛善志	2012-11-06	新患者	初治		2012-11-06							治疗	湖北省武汉市东湖高新技术开发区	武汉东湖新技术开发区佛祖岭社区卫生服务中心		完成疗程
		528	普通病案	湖北省武汉市江夏区	武汉市江夏区疾病预防控制中心	湖北省武汉市江夏区	武汉市江夏区疾病预防控制中心	420115008-2012-00549	528	16	男性	汉族	学生	本县区	420115001		直接就诊	2012-09-06	2012-11-07	62			湖北省武汉市江夏区	武汉市江夏区疾病预防控制中心	湖北省武汉市江夏区	武汉市江夏区疾病预防控制中心			2012-11-08 16	继发	病原学阴性		艾医生	2012-11-08	新患者	初治		2012-11-08							治疗	湖北省武汉市江夏区	武汉市江夏区纸坊社区卫生服务中心		完成疗程
		529	普通病案	湖北省武汉市洪山区	洪山区疾病预防控制中心	湖北省武汉市洪山区	洪山区疾病预防控制中心	420111016-2012-00593	529	18	男性	汉族	学生	本县区	420111003		转诊	2012-11-05	2012-11-06	1	阴性	2012-11-08	湖北省武汉市洪山区	洪山区疾病预防控制中心	湖北省武汉市洪山区	洪山区疾病预防控制中心			2012-11-08 10	继发	病原学阳性		李仁惠	2012-11-08	新患者	初治		2012-11-08							治疗	湖北省武汉市洪山区	湖北工业大学医院		治愈
		530	普通病案	湖北省武汉市洪山区	洪山区疾病预防控制中心	湖北省武汉市洪山区	洪山区疾病预防控制中心	420111016-2012-00582	530	27	男性	汉族	学生	本县区	420111001		直接就诊	2012-10-24	2012-11-01	8	阴性	2012-11-08	湖北省武汉市洪山区	洪山区疾病预防控制中心	湖北省武汉市洪山区	洪山区疾病预防控制中心			2012-11-08 09	继发	病原学阳性		吴杰	2012-11-08	新患者	初治		2012-11-08							治疗	湖北省武汉市洪山区	武汉市洪山区中医医院		治愈
		531	普通病案	湖北省武汉市洪山区	洪山区疾病预防控制中心	湖北省武汉市洪山区	洪山区疾病预防控制中心	420111016-2012-00585	531	21	女性	汉族	学生	本县区	420111006		转诊	2012-10-25	2012-10-29	4	阴性	2012-11-08	湖北省武汉市洪山区	洪山区疾病预防控制中心	湖北省武汉市洪山区	洪山区疾病预防控制中心			2012-11-08 10	继发	病原学阴性		李仁惠	2012-11-08	新患者	初治		2012-11-08							治疗	湖北省武汉市洪山区	洪山区疾病预防控制中心		完成疗程
		532	普通病案	湖北省武汉市洪山区	洪山区疾病预防控制中心	湖北省武汉市洪山区	洪山区疾病预防控制中心	420111016-2012-00591	532	26	男性	汉族	学生	本县区	420111002		转诊	2012-09-26	2012-11-05	40	阴性	2012-11-08	湖北省武汉市洪山区	洪山区疾病预防控制中心	湖北省武汉市洪山区	洪山区疾病预防控制中心			2012-11-08 09	继发	病原学阴性		李仁惠	2012-11-08	新患者	初治		2012-11-08							治疗	湖北省武汉市洪山区	洪山区疾病预防控制中心		完成疗程
		533	普通病案	湖北省武汉市洪山区	洪山区疾病预防控制中心	湖北省武汉市洪山区	洪山区疾病预防控制中心	420111016-2012-00584	533	21	女性	汉族	学生	本县区	420111002		直接就诊	2012-10-19	2012-11-01	13	阴性	2012-11-08	湖北省武汉市洪山区	洪山区疾病预防控制中心	湖北省武汉市洪山区	洪山区疾病预防控制中心			2012-11-08 10	继发	病原学阴性		吴杰	2012-11-08	新患者	初治		2012-11-08							治疗	湖北省武汉市洪山区	洪山区疾病预防控制中心		完成疗程
		534	普通病案	湖北省武汉市洪山区	洪山区疾病预防控制中心	湖北省武汉市洪山区	洪山区疾病预防控制中心	420111016-2012-00586	534	19	男性	汉族	学生	本县区	420111002		转诊	2012-09-25	2012-11-01	37	阴性	2012-11-08	湖北省武汉市洪山区	洪山区疾病预防控制中心	湖北省武汉市洪山区	洪山区疾病预防控制中心			2012-11-08 10	继发	病原学阴性		吴杰	2012-11-08	新患者	初治		2012-11-08							治疗	湖北省武汉市洪山区	洪山区疾病预防控制中心		完成疗程
		535	普通病案	湖北省武汉市洪山区	洪山区疾病预防控制中心	湖北省武汉市洪山区	洪山区疾病预防控制中心	420111016-2012-00594	535	19	男性	汉族	学生	本县区	420111001		直接就诊	2012-10-11	2012-11-09	29	阴性	2012-11-09	湖北省武汉市洪山区	洪山区疾病预防控制中心	湖北省武汉市洪山区	洪山区疾病预防控制中心			2012-11-09 09	继发	病原学阴性		吴杰	2012-11-09	新患者	初治		2012-11-09							治疗	湖北省武汉市洪山区	洪山区疾病预防控制中心		完成疗程
		536	普通病案	湖北省武汉市汉阳区	武汉市汉阳区结核病防治所	湖北省武汉市汉阳区	武汉市汉阳区结核病防治所	420105012-2012-00329	536	18	男性	汉族	学生	本县区	420105002		转诊	2012-10-26	2012-10-29	3	阴性	2012-10-30	湖北省武汉市汉阳区	武汉市汉阳区结核病防治所	湖北省武汉市汉阳区	武汉市汉阳区结核病防治所			2012-11-13 10	继发	病原学阴性		王长武	2012-11-13	新患者	初治	2012-12-28	2012-11-13							治疗	湖北省武汉市汉阳区	汉阳区四新街社区卫生服务中心		完成疗程
		537	普通病案	湖北省武汉市汉阳区	武汉市汉阳区结核病防治所	湖北省武汉市汉阳区	武汉市汉阳区结核病防治所	420105012-2012-00324	537	17	女性	汉族	学生	本县区	420105006		转诊	2012-10-15	2012-10-17	2	阴性	2012-10-20	湖北省武汉市汉阳区	武汉市汉阳区结核病防治所	湖北省武汉市汉阳区	武汉市汉阳区结核病防治所			2012-11-13 08	继发	病原学阳性		朱建	2012-11-13	新患者	初治	2012-12-20	2012-11-13							治疗	湖北省武汉市汉阳区	汉阳区洲头街社区卫生服务中心		治愈
		538	普通病案	湖北省武汉市汉阳区	武汉市汉阳区结核病防治所	湖北省武汉市汉阳区	武汉市汉阳区结核病防治所	420105012-2012-00320	538	19	男性	汉族	学生	本县区	420105004		健康体检	2012-09-20	2012-10-02	12	阴性	2012-10-02	湖北省武汉市汉阳区	武汉市汉阳区结核病防治所	湖北省武汉市汉阳区	武汉市汉阳区结核病防治所			2012-11-13 08	继发	病原学阴性		王长武	2012-11-13	新患者	初治	2012-12-03	2012-11-13							治疗	湖北省武汉市汉阳区	汉阳区晴川街社区卫生服务中心		完成疗程
		539	普通病案	湖北省武汉市汉阳区	武汉市汉阳区结核病防治所	湖北省武汉市汉阳区	武汉市汉阳区结核病防治所	420105012-2012-00328	539	21	男性	汉族	学生	本县区	420105002		转诊	2012-09-10	2012-10-10	30	阴性	2012-10-30	湖北省武汉市汉阳区	武汉市汉阳区结核病防治所	湖北省武汉市汉阳区	武汉市汉阳区结核病防治所			2012-11-13 09	继发	病原学阴性		朱建	2012-11-13	新患者	初治	2012-12-28	2012-11-13							治疗	湖北省武汉市汉阳区	汉阳区建桥街社区卫生服务中心		完成疗程
		540	普通病案	湖北省武汉市洪山区	洪山区疾病预防控制中心	湖北省武汉市洪山区	洪山区疾病预防控制中心	420111016-2012-00598	540	21	女性	汉族	学生	本县区	420111006		转诊	2012-11-07	2012-11-10	3	阴性	2012-11-13	湖北省武汉市洪山区	洪山区疾病预防控制中心	湖北省武汉市洪山区	洪山区疾病预防控制中心			2012-11-13 10	继发	病原学阴性		李仁惠	2012-11-13	新患者	初治		2012-11-13							治疗	湖北省武汉市洪山区	洪山区疾病预防控制中心		完成疗程
		541	普通病案	湖北省武汉市洪山区	洪山区疾病预防控制中心	湖北省武汉市洪山区	洪山区疾病预防控制中心	420111016-2012-00599	541	18	男性	汉族	学生	本县区	420111006		追踪	2012-09-11	2012-09-21	10	阴性	2012-11-13	湖北省武汉市洪山区	洪山区疾病预防控制中心	湖北省武汉市洪山区	洪山区疾病预防控制中心			2012-11-13 10	继发	病原学阴性		吴杰	2012-11-13	新患者	初治		2012-11-13							治疗	湖北省武汉市洪山区	洪山区疾病预防控制中心		完成疗程
		542	普通病案	湖北省武汉市汉阳区	武汉市汉阳区结核病防治所	湖北省武汉市汉阳区	武汉市汉阳区结核病防治所	420105012-2012-00333	542	16	女性	汉族	学生	本县区	420105008		追踪	2012-08-07	2012-09-25	49	阴性	2012-09-25	湖北省武汉市汉阳区	武汉市汉阳区结核病防治所	湖北省武汉市汉阳区	武汉市汉阳区结核病防治所			2012-11-14 14	继发	病原学阴性		周震	2012-11-14	新患者	初治	2012-11-23	2012-11-14							治疗	湖北省武汉市汉阳区	汉阳区琴断口街社区卫生服务中心		失败
		543	普通病案	湖北省武汉市汉阳区	武汉市汉阳区结核病防治所	湖北省武汉市汉阳区	武汉市汉阳区结核病防治所	420105012-2012-00339	543	21	男性	汉族	学生	本县区	420105004		转诊	2012-11-01	2012-11-06	5	阴性	2012-11-15	湖北省武汉市汉阳区	武汉市汉阳区结核病防治所	湖北省武汉市汉阳区	武汉市汉阳区结核病防治所			2012-11-15 14	继发	病原学阴性		周震	2012-11-15	新患者	初治	2013-01-16	2012-11-15							治疗	湖北省武汉市汉阳区	汉阳区晴川街社区卫生服务中心		完成疗程
		544	普通病案	湖北省武汉市洪山区	洪山区疾病预防控制中心	湖北省武汉市洪山区	洪山区疾病预防控制中心	420111016-2012-00601	544	22	男性	汉族	学生	本县区	420111002		转诊	2012-07-08	2012-11-13	128	阴性	2012-11-15	湖北省武汉市洪山区	洪山区疾病预防控制中心	湖北省武汉市洪山区	洪山区疾病预防控制中心			2012-11-15 09	继发	病原学阴性		李仁惠	2012-11-15	新患者	初治		2012-11-15							治疗	湖北省武汉市洪山区	洪山区疾病预防控制中心		完成疗程
		545	普通病案	湖北省武汉市汉南区	武汉市汉南区疾病预防控制中心	湖北省武汉市汉南区	武汉市汉南区疾病预防控制中心	420113006-2012-00516	545	21	女性	汉族	学生	本县区	420113096		转诊	2012-10-26	2012-10-29	3	阴性	2012-11-02	湖北省武汉市汉南区	武汉市汉南区疾病预防控制中心	湖北省武汉市汉南区	武汉市汉南区疾病预防控制中心			2012-11-19 14	继发	病原学阴性		王刚	2012-11-19	新患者	初治		2012-11-19							治疗	湖北省武汉市汉南区	武汉市汉南区疾病预防控制中心		完成疗程
		546	普通病案	湖北省武汉市洪山区	洪山区疾病预防控制中心	湖北省武汉市洪山区	洪山区疾病预防控制中心	420111016-2012-00604	546	18	女性	汉族	学生	本县区	420111011		追踪	2012-09-20	2012-09-22	2	阴性	2012-11-20	湖北省武汉市洪山区	洪山区疾病预防控制中心	湖北省武汉市洪山区	洪山区疾病预防控制中心			2012-11-20 10	继发	病原学阴性		吴杰	2012-11-20	新患者	初治		2012-11-20							治疗	湖北省武汉市洪山区	武汉市洪山区张家湾街社区卫生中心		完成疗程
		547	普通病案	湖北省武汉市洪山区	洪山区疾病预防控制中心	湖北省武汉市洪山区	洪山区疾病预防控制中心	420111016-2012-00605	547	22	男性	汉族	学生	本县区	420111003		转诊	2012-11-15	2012-11-17	2	阴性	2012-11-20	湖北省武汉市洪山区	洪山区疾病预防控制中心	湖北省武汉市洪山区	洪山区疾病预防控制中心			2012-11-20 08	血行播散	病原学阴性		吴杰	2012-11-20	新患者	初治		2012-11-20							治疗	湖北省武汉市洪山区	湖北工业大学医院		完成疗程
		548	普通病案	湖北省武汉市黄陂区	武汉市黄陂区疾病预防控制中心	湖北省武汉市黄陂区	武汉市黄陂区疾病预防控制中心	420116003-2012-00773	548	21	男性	汉族	学生	本县区	420116007		转诊	2012-07-19	2012-11-20	124			湖北省武汉市黄陂区	武汉市黄陂区疾病预防控制中心	湖北省武汉市黄陂区	武汉市黄陂区疾病预防控制中心			2012-11-21 10	继发	病原学阳性		汪亮	2012-11-21	新患者	初治		2012-11-21							治疗	湖北省武汉市黄陂区	武汉市黄陂区天河街道卫生院		治愈
		549	普通病案	湖北省武汉市江岸区	江岸区疾病预防控制中心	湖北省武汉市江岸区	江岸区疾病预防控制中心	420102000-2012-00464	549	18	男性	汉族	学生	本市其它县区	420102011		转诊	2012-11-07	2012-11-07	0	未提供		湖北省武汉市江岸区	江岸区疾病预防控制中心	湖北省武汉市江岸区	江岸区疾病预防控制中心			2012-11-24 11	继发	病原学阴性		许丽芳	2012-11-24	新患者	初治		2012-11-24							治疗	湖北省武汉市江岸区	江岸区新村街社区卫生服务中心		完成疗程
		550	普通病案	湖北省武汉市汉阳区	武汉市汉阳区结核病防治所	湖北省武汉市汉阳区	武汉市汉阳区结核病防治所	420105012-2012-00349	550	21	男性	汉族	学生	本县区	420105008		转诊	2012-11-03	2012-11-13	10	阴性	2012-11-14	湖北省武汉市汉阳区	武汉市汉阳区结核病防治所	湖北省武汉市汉阳区	武汉市汉阳区结核病防治所			2012-11-26 14	继发	病原学阴性		周震	2012-11-26	新患者	初治	2013-01-14	2012-11-26							治疗	湖北省武汉市汉阳区	汉阳区琴断口街社区卫生服务中心		完成疗程
		551	普通病案	湖北省武汉市蔡甸区	武汉市蔡甸区疾病预防控制中心	湖北省武汉市蔡甸区	武汉市蔡甸区疾病预防控制中心	420114003-2012-00403	551	18	男性	汉族	学生	本县区	420114004		转诊	2012-11-14	2012-11-27	13			湖北省武汉市蔡甸区	武汉市蔡甸区疾病预防控制中心	湖北省武汉市蔡甸区	武汉市蔡甸区疾病预防控制中心			2012-11-27 14	继发	病原学阴性		刘晓燕	2012-11-27	新患者	初治		2012-11-27							治疗	湖北省武汉市蔡甸区	武汉市蔡甸区侏儒街卫生院		完成疗程
		552	普通病案	湖北省武汉市蔡甸区	武汉市蔡甸区疾病预防控制中心	湖北省武汉市蔡甸区	武汉市蔡甸区疾病预防控制中心	420114003-2012-00402	552	18	男性	汉族	学生	本县区	420114008		转诊	2012-11-07	2012-11-27	20			湖北省武汉市蔡甸区	武汉市蔡甸区疾病预防控制中心	湖北省武汉市蔡甸区	武汉市蔡甸区疾病预防控制中心			2012-11-27 14	继发	病原学阴性		刘晓燕	2012-11-27	新患者	初治		2012-11-27							治疗	湖北省武汉市蔡甸区	武汉市蔡甸区玉贤街卫生院		完成疗程
		553	普通病案	湖北省武汉市洪山区	洪山区疾病预防控制中心	湖北省武汉市洪山区	洪山区疾病预防控制中心	420111016-2012-00619	553	26	男性	汉族	学生	本县区	420111002		转诊	2012-11-07	2012-11-26	19	阴性	2012-11-27	湖北省武汉市洪山区	洪山区疾病预防控制中心	湖北省武汉市洪山区	洪山区疾病预防控制中心			2012-11-27 08	继发	病原学阴性		吴杰	2012-11-27	新患者	初治		2012-11-27							治疗	湖北省武汉市洪山区	洪山区疾病预防控制中心		完成疗程
		554	普通病案	湖北省武汉市洪山区	洪山区疾病预防控制中心	湖北省武汉市洪山区	洪山区疾病预防控制中心	420111016-2012-00618	554	20	女性	汉族	学生	本县区	420111002		转诊	2012-11-20	2012-11-26	6	阴性	2012-11-27	湖北省武汉市洪山区	洪山区疾病预防控制中心	湖北省武汉市洪山区	洪山区疾病预防控制中心			2012-11-27 08	继发	病原学阳性		李仁惠	2012-11-27	新患者	初治		2012-11-27							治疗	湖北省武汉市洪山区	洪山区疾病预防控制中心		治愈
		555	普通病案	湖北省武汉市汉南区	武汉市汉南区疾病预防控制中心	湖北省武汉市汉南区	武汉市汉南区疾病预防控制中心	420113006-2012-00249	555	19	男性	汉族	学生	本县区	420113096		其它	2012-09-11	2012-11-27	77	阴性	2012-11-07	湖北省武汉市汉南区	武汉市汉南区疾病预防控制中心	湖北省武汉市汉南区	武汉市汉南区疾病预防控制中心			2012-11-27 10	继发	病原学阴性		聂绪军	2012-11-27	新患者	初治		2012-11-27							治疗				完成疗程
		556	普通病案	湖北省武汉市江夏区	武汉市江夏区疾病预防控制中心	湖北省武汉市江夏区	武汉市江夏区疾病预防控制中心	420115008-2012-00588	556	24	男性	汉族	学生	本县区	420115001		转诊	2012-08-01	2012-11-27	118	阴性	2012-11-27	湖北省武汉市江夏区	武汉市江夏区疾病预防控制中心	湖北省武汉市江夏区	武汉市江夏区疾病预防控制中心			2012-11-28 11	继发	病原学阴性		陈医生	2012-11-28	新患者	初治		2012-11-28							治疗	湖北省武汉市江夏区	武汉市江夏区纸坊社区卫生服务中心		完成疗程
		557	普通病案	湖北省武汉市洪山区	洪山区疾病预防控制中心	湖北省武汉市洪山区	洪山区疾病预防控制中心	420111016-2012-00620	557	21	女性	汉族	学生	本县区	420111002		转诊	2012-10-16	2012-10-23	7	阴性	2012-11-28	湖北省武汉市洪山区	洪山区疾病预防控制中心	湖北省武汉市洪山区	洪山区疾病预防控制中心			2012-11-28 09	继发	病原学阳性		吴杰	2012-11-28	新患者	初治		2012-11-28							治疗	湖北省武汉市洪山区	洪山区疾病预防控制中心		治愈
		558	普通病案	湖北省武汉市江岸区	江岸区疾病预防控制中心	湖北省武汉市江岸区	江岸区疾病预防控制中心	420102000-2012-00476	558	17	男性	汉族	学生	本县区	420102009		转诊	2012-11-05	2012-11-20	15			湖北省武汉市江岸区	江岸区疾病预防控制中心	湖北省武汉市江岸区	江岸区疾病预防控制中心			2012-11-30 10	继发	病原学阴性		叶惠	2012-11-30	新患者	初治		2012-11-30							治疗	湖北省武汉市江岸区	长江航运总医院		完成疗程
		559	普通病案	湖北省武汉市新洲区	新洲区疾病预防控制中心	湖北省武汉市新洲区	新洲区疾病预防控制中心	420117002-2012-00673	559	22	女性	汉族	学生	本县区	420117002		转诊	2012-11-04	2012-11-30	26	阴性	2012-11-30	湖北省武汉市新洲区	新洲区疾病预防控制中心	湖北省武汉市新洲区	新洲区疾病预防控制中心			2012-11-30 14	继发	病原学阴性		张念中	2012-11-30	新患者	初治		2012-11-30							治疗	湖北省武汉市新洲区	新洲区阳逻街卫生院		完成疗程
		560	普通病案	湖北省武汉市汉阳区	武汉市汉阳区结核病防治所	湖北省武汉市汉阳区	武汉市汉阳区结核病防治所	420105012-2012-00355	560	17	男性	汉族	学生	本县区	420105007		转诊	2012-10-25	2012-11-18	24	阴性	2012-11-24	湖北省武汉市汉阳区	武汉市汉阳区结核病防治所	湖北省武汉市汉阳区	武汉市汉阳区结核病防治所			2012-12-03 15	继发	病原学阳性		周震	2012-12-03	新患者	初治	2013-01-24	2012-12-03							治疗	湖北省武汉市汉阳区	汉阳区五里街社区卫生服务中心		治愈
		561	普通病案	湖北省武汉市洪山区	洪山区疾病预防控制中心	湖北省武汉市洪山区	洪山区疾病预防控制中心	420111016-2012-00623	561	18	女性	汉族	学生	本县区	420111002		转诊	2012-11-19	2012-11-30	11	阴性	2012-12-03	湖北省武汉市洪山区	洪山区疾病预防控制中心	湖北省武汉市洪山区	洪山区疾病预防控制中心			2012-12-03 08	继发	病原学阴性		吴杰	2012-12-03	新患者	初治		2012-12-03							治疗	湖北省武汉市洪山区	洪山区疾病预防控制中心		完成疗程
		562	普通病案	湖北省武汉市武昌区	武昌区疾病预防控制中心	湖北省武汉市武昌区	武昌区疾病预防控制中心	420106010-2012-00637	562	23	男性	汉族	学生	本县区	420106013		直接就诊	2012-12-03	2012-12-04	1	阴性	2012-12-04	湖北省武汉市武昌区	武昌区疾病预防控制中心	湖北省武汉市武昌区	武昌区疾病预防控制中心			2012-12-04 14	继发	病原学阳性		刘文	2012-12-04	新患者	初治		2012-12-04							治疗				治愈
		563	普通病案	湖北省武汉市洪山区	洪山区疾病预防控制中心	湖北省武汉市洪山区	洪山区疾病预防控制中心	420111016-2012-00627	563	24	男性	汉族	学生	本县区	420111002		转诊	2012-11-13	2012-12-03	20	阴性	2012-12-04	湖北省武汉市洪山区	洪山区疾病预防控制中心	湖北省武汉市洪山区	洪山区疾病预防控制中心			2012-12-04 08	继发	病原学阴性		吴杰	2012-12-04	新患者	初治		2012-12-04							治疗	湖北省武汉市洪山区	洪山区关山街邮电社区卫生服务中心		完成疗程
		564	普通病案	湖北省武汉市东西湖区	东西湖区结核病防治所	湖北省武汉市东西湖区	东西湖区结核病防治所	420112019-2012-00209	564	21	男性	汉族	学生	本县区	420112400		追踪	2012-11-05	2012-11-10	5	阴性	2012-12-05	湖北省武汉市东西湖区	东西湖区结核病防治所	湖北省武汉市东西湖区	东西湖区结核病防治所			2012-12-05 16	继发	病原学阴性		胡才生	2012-12-05	新患者	初治		2012-12-05							治疗	湖北省武汉市东西湖区	常青花园社区卫生服务中心		完成疗程
		565	普通病案	湖北省武汉市洪山区	洪山区疾病预防控制中心	湖北省武汉市洪山区	洪山区疾病预防控制中心	420111016-2012-00628	565	23	女性	汉族	学生	本县区	420111002		转诊	2012-11-05	2012-11-15	10	阴性	2012-12-05	湖北省武汉市洪山区	洪山区疾病预防控制中心	湖北省武汉市洪山区	洪山区疾病预防控制中心			2012-12-05 15	继发	病原学阴性		吴杰	2012-12-05	新患者	初治		2012-12-05							治疗	湖北省武汉市洪山区	中国地质大学医院		完成疗程
		566	普通病案	湖北省武汉市东西湖区	东西湖区结核病防治所	湖北省武汉市东西湖区	东西湖区结核病防治所	420112019-2012-00210	566	23	男性	汉族	学生	本县区	420112001		转诊	2012-08-01	2012-11-18	109	阴性	2012-12-06	湖北省武汉市东西湖区	东西湖区结核病防治所	湖北省武汉市东西湖区	东西湖区结核病防治所			2012-12-06 10	继发	病原学阴性		孟刚	2012-12-06	新患者	初治		2012-12-06							治疗	湖北省武汉市东西湖区	东西湖区吴家山街社区卫生服务中心		完成疗程
		567	普通病案	湖北省武汉市硚口区	武汉市结核病防治所	湖北省武汉市硚口区	武汉市结核病防治所	420104019-2012-00506	567	20	女性	汉族	学生	本县区	420104005		直接就诊	2012-11-10	2012-12-05	25	阴性	2012-12-07	湖北省武汉市硚口区	武汉市结核病防治所	湖北省武汉市硚口区	武汉市结核病防治所			2012-12-06 15	继发	病原学阴性		张秀华	2012-12-06	新患者	初治		2012-12-06							治疗	湖北省武汉市硚口区	武汉市结核病防治所		完成疗程
		568	普通病案	湖北省武汉市洪山区	洪山区疾病预防控制中心	湖北省武汉市洪山区	洪山区疾病预防控制中心	420111016-2012-00629	568	21	男性	汉族	学生	本县区	420111002		追踪	2012-10-25	2012-10-30	5	阴性	2012-12-07	湖北省武汉市洪山区	洪山区疾病预防控制中心	湖北省武汉市洪山区	洪山区疾病预防控制中心			2012-12-07 10	继发	病原学阴性		吴杰	2012-12-07	新患者	初治		2012-12-07							治疗	湖北省武汉市洪山区	洪山区疾病预防控制中心		完成疗程
		569	普通病案	湖北省武汉市洪山区	洪山区疾病预防控制中心	湖北省武汉市洪山区	洪山区疾病预防控制中心	420111016-2012-00630	569	20	男性	汉族	学生	本县区	420111006		转诊	2012-09-28	2012-11-16	49	阴性	2012-12-07	湖北省武汉市洪山区	洪山区疾病预防控制中心	湖北省武汉市洪山区	洪山区疾病预防控制中心			2012-12-07 10	继发	病原学阴性		李仁惠	2012-12-07	新患者	初治		2012-12-07							治疗	湖北省武汉市洪山区	洪山区疾病预防控制中心		完成疗程
		570	普通病案	湖北省武汉市洪山区	洪山区疾病预防控制中心	湖北省武汉市洪山区	洪山区疾病预防控制中心	420111016-2012-00632	570	20	男性	汉族	学生	本县区	420111006		转诊	2012-09-30	2012-12-06	67	阴性	2012-12-07	湖北省武汉市洪山区	洪山区疾病预防控制中心	湖北省武汉市洪山区	洪山区疾病预防控制中心			2012-12-07 08	继发	病原学阳性		李仁惠	2012-12-07	新患者	初治		2012-12-07							治疗	湖北省武汉市洪山区	洪山区疾病预防控制中心		治愈
		571	普通病案	湖北省武汉市洪山区	洪山区疾病预防控制中心	湖北省武汉市洪山区	洪山区疾病预防控制中心	420111016-2012-00635	571	19	男性	汉族	学生	本县区	420111007		转诊	2012-12-07	2012-12-08	1	阴性	2012-12-10	湖北省武汉市洪山区	洪山区疾病预防控制中心	湖北省武汉市洪山区	洪山区疾病预防控制中心			2012-12-10 08	继发	病原学阴性		吴杰	2012-12-10	新患者	初治		2012-12-10							治疗	湖北省武汉市洪山区	洪山区洪山街社区卫生服务中心		完成疗程
		572	普通病案	湖北省武汉市汉南区	武汉市汉南区疾病预防控制中心	湖北省武汉市汉南区	武汉市汉南区疾病预防控制中心	420113006-2012-00517	572	22	男性	汉族	学生	本市其它县区	420113096		转诊	2012-11-11	2012-11-16	5	阴性	2012-11-18	湖北省武汉市汉南区	武汉市汉南区疾病预防控制中心	湖北省武汉市汉南区	武汉市汉南区疾病预防控制中心			2012-12-10 09	继发	病原学阴性		王刚	2012-12-10	新患者	初治		2012-12-10							治疗	湖北省武汉市汉南区	武汉市汉南区疾病预防控制中心		完成疗程
		573	普通病案	湖北省武汉市黄陂区	武汉市黄陂区疾病预防控制中心	湖北省武汉市黄陂区	武汉市黄陂区疾病预防控制中心	420116003-2012-00813	573	17	男性	汉族	学生	本县区	420116001		转诊	2012-11-25	2012-12-10	15			湖北省武汉市黄陂区	武汉市黄陂区疾病预防控制中心	湖北省武汉市黄陂区	武汉市黄陂区疾病预防控制中心			2012-12-12 16	继发	病原学阴性		汪亮	2012-12-12	新患者	初治		2012-12-12							治疗	湖北省武汉市黄陂区	武汉市黄陂区环城社区卫生服务中心		完成疗程
		574	普通病案	湖北省武汉市洪山区	洪山区疾病预防控制中心	湖北省武汉市洪山区	洪山区疾病预防控制中心	420111016-2012-00636	574	18	男性	汉族	学生	本县区	420111008		转诊	2012-12-02	2012-12-10	8	阴性	2012-12-12	湖北省武汉市洪山区	洪山区疾病预防控制中心	湖北省武汉市洪山区	洪山区疾病预防控制中心			2012-12-12 08	继发	病原学阴性		吴杰	2012-12-12	新患者	初治		2012-12-12							治疗	湖北省武汉市洪山区	洪山区和平街社区卫生服务中心		完成疗程
		575	普通病案	湖北省武汉市洪山区	洪山区疾病预防控制中心	湖北省武汉市洪山区	洪山区疾病预防控制中心	420111016-2012-00643	575	21	女性	汉族	学生	本县区	420111002		转诊	2012-11-15	2012-11-16	1	阴性	2012-12-12	湖北省武汉市洪山区	洪山区疾病预防控制中心	湖北省武汉市洪山区	洪山区疾病预防控制中心			2012-12-12 09	继发	病原学阴性		吴杰	2012-12-12	新患者	初治		2012-12-12							治疗	湖北省武汉市洪山区	洪山区疾病预防控制中心		完成疗程
		576	普通病案	湖北省武汉市洪山区	洪山区疾病预防控制中心	湖北省武汉市洪山区	洪山区疾病预防控制中心	420111016-2012-00642	576	20	男性	土族	学生	本县区	420111002		转诊	2012-11-18	2012-12-11	23	阴性	2012-12-12	湖北省武汉市洪山区	洪山区疾病预防控制中心	湖北省武汉市洪山区	洪山区疾病预防控制中心			2012-12-12 08	继发	病原学阴性		吴杰	2012-12-12	新患者	初治		2012-12-12							治疗	湖北省武汉市洪山区	武汉市第三医院光谷院区		完成疗程
		577	普通病案	湖北省武汉市洪山区	洪山区疾病预防控制中心	湖北省武汉市洪山区	洪山区疾病预防控制中心	420111016-2012-00641	577	22	女性	汉族	学生	本县区	420111002		转诊	2012-11-28	2012-12-11	13	阴性	2012-12-12	湖北省武汉市洪山区	洪山区疾病预防控制中心	湖北省武汉市洪山区	洪山区疾病预防控制中心			2012-12-12 08	继发	病原学阳性		李仁惠	2012-12-12	新患者	初治		2012-12-12							治疗	湖北省武汉市洪山区	洪山区疾病预防控制中心		治愈
		578	普通病案	湖北省武汉市硚口区	武汉市结核病防治所	湖北省武汉市硚口区	武汉市结核病防治所	420104019-2012-00517	578	24	女性	汉族	学生	本县区	420104003		转诊	2012-11-19	2012-12-11	22	阴性	2012-12-13	湖北省武汉市硚口区	武汉市结核病防治所	湖北省武汉市硚口区	武汉市结核病防治所			2012-12-12 17	继发	病原学阴性		李春清	2012-12-13	新患者	初治		2012-12-13							治疗	湖北省武汉市硚口区	武汉市结核病防治所		完成疗程
		579	普通病案	湖北省武汉市江岸区	江岸区疾病预防控制中心	湖北省武汉市江岸区	江岸区疾病预防控制中心	420102000-2012-00488	579	19	男性	汉族	学生	本市其它县区	420102017		转诊	2012-11-09	2012-11-24	15	未提供		湖北省武汉市江岸区	江岸区疾病预防控制中心	湖北省武汉市江岸区	江岸区疾病预防控制中心			2012-12-14 10	继发	病原学阳性		杜娟	2012-12-14	新患者	初治		2012-12-14							治疗	湖北省武汉市江岸区	江岸区后湖街金桥社区卫生服务中心		治愈
		580	普通病案	湖北省武汉市江汉区	武汉市江汉区疾病预防控制中心	湖北省武汉市江汉区	武汉市江汉区疾病预防控制中心	420103013-2012-00387	580	22	男性	汉族	学生	本县区	420103011		追踪	2012-12-12	2012-12-17	5			湖北省武汉市江汉区	武汉市江汉区疾病预防控制中心	湖北省武汉市江汉区	武汉市江汉区疾病预防控制中心			2012-12-17 09	继发	病原学阴性		文汉礼	2012-12-17	新患者	初治		2012-12-17							治疗	湖北省武汉市江汉区	江汉区前进街社区卫生服务中心		完成疗程
		581	普通病案	湖北省武汉市洪山区	洪山区疾病预防控制中心	湖北省武汉市洪山区	洪山区疾病预防控制中心	420111016-2012-00647	581	21	男性	汉族	学生	本县区	420111002		转诊	2012-06-16	2012-12-17	184	阴性	2012-12-18	湖北省武汉市洪山区	洪山区疾病预防控制中心	湖北省武汉市洪山区	洪山区疾病预防控制中心			2012-12-18 08	继发	病原学阴性		吴杰	2012-12-18	新患者	初治		2012-12-18							治疗	湖北省武汉市洪山区	中国地质大学医院		完成疗程
		582	普通病案	湖北省武汉市蔡甸区	武汉市蔡甸区疾病预防控制中心	湖北省武汉市蔡甸区	武汉市蔡甸区疾病预防控制中心	420114003-2012-00432	582	9	男性	汉族	学生	本市其它县区	420114006		转诊	2012-12-12	2012-12-19	7	阴性	2012-12-19	湖北省武汉市蔡甸区	武汉市蔡甸区疾病预防控制中心	湖北省武汉市蔡甸区	武汉市蔡甸区疾病预防控制中心			2012-12-19 16	血行播散	病原学阴性		刘晓燕	2012-12-19	新患者	初治		2012-12-19							治疗	湖北省武汉市蔡甸区	武汉市蔡甸区张湾街卫生院		其他
		583	普通病案	湖北省武汉市硚口区	武汉市结核病防治所	湖北省武汉市硚口区	武汉市结核病防治所	420104019-2012-00524	583	22	男性	汉族	学生	本县区	420104006		转诊	2012-12-01	2012-12-18	17	阴性	2012-12-20	湖北省武汉市硚口区	武汉市结核病防治所	湖北省武汉市硚口区	武汉市结核病防治所			2012-12-19 09	继发	病原学阴性		张秀华	2012-12-19	新患者	初治		2012-12-19							治疗	湖北省武汉市硚口区	武汉市结核病防治所		完成疗程
		584	普通病案	湖北省武汉市武昌区	武昌区疾病预防控制中心	湖北省武汉市武昌区	武昌区疾病预防控制中心	420106010-2012-00650	584	21	女性	汉族	学生	本市其它县区	420106013		转诊	2012-12-07	2012-12-12	5	阴性	2012-12-21	湖北省武汉市武昌区	武昌区疾病预防控制中心	湖北省武汉市武昌区	武昌区疾病预防控制中心			2012-12-21 08	继发	病原学阳性		刘文	2012-12-21	新患者	初治		2012-12-21							治疗				治愈
		585	普通病案	湖北省武汉市江岸区	江岸区疾病预防控制中心	湖北省武汉市江岸区	江岸区疾病预防控制中心	420102000-2012-00502	585	15	女性	汉族	学生	本市其它县区	420102015		转诊	2012-11-06	2012-12-06	30			湖北省武汉市江岸区	江岸区疾病预防控制中心	湖北省武汉市江岸区	江岸区疾病预防控制中心			2012-12-24 12	继发	病原学阴性		刘小玉	2012-12-24	新患者	初治		2012-12-24							治疗	湖北省武汉市江岸区	江岸区花桥街第二社区卫生服务中心		完成疗程
		586	普通病案	湖北省武汉市江夏区	武汉市江夏区疾病预防控制中心	湖北省武汉市江夏区	武汉市江夏区疾病预防控制中心	420115008-2012-00612	586	20	男性	汉族	学生	本县区	420115405		转诊	2012-11-22	2012-12-23	31	阴性	2012-12-23	湖北省武汉市江夏区	武汉市江夏区疾病预防控制中心	湖北省武汉市江夏区	武汉市江夏区疾病预防控制中心			2012-12-24 10	继发	病原学阳性		艾医生	2012-12-24	新患者	初治		2012-12-24							治疗	湖北省武汉市江夏区	武汉市江夏区经济开发区大桥新区卫生院		治愈
		587	普通病案	湖北省武汉市江夏区	武汉市江夏区疾病预防控制中心	湖北省武汉市江夏区	武汉市江夏区疾病预防控制中心	420115008-2012-00615	587	23	男性	汉族	学生	其他省	420115405		追踪	2012-10-11	2012-12-24	74	阴性	2012-12-23	湖北省武汉市江夏区	武汉市江夏区疾病预防控制中心	湖北省武汉市江夏区	武汉市江夏区疾病预防控制中心			2012-12-25 10	继发	病原学阴性		熊医生	2012-12-25	新患者	初治		2012-12-25							治疗	湖北省武汉市江夏区	武汉市江夏区经济开发区大桥新区卫生院		完成疗程
		588	普通病案	湖北省武汉市江岸区	江岸区疾病预防控制中心	湖北省武汉市江岸区	江岸区疾病预防控制中心	420102000-2012-00504	588	21	男性	汉族	学生	本县区	420102010		转诊	2012-12-03	2012-12-03	0			湖北省武汉市江岸区	江岸区疾病预防控制中心	湖北省武汉市江岸区	江岸区疾病预防控制中心			2012-12-28 10	继发	病原学阴性		叶惠	2012-12-28	新患者	初治		2012-12-28							治疗	湖北省武汉市江岸区	长江航运总医院		完成疗程
		589	普通病案	湖北省武汉市黄陂区	武汉市黄陂区疾病预防控制中心	湖北省武汉市黄陂区	武汉市黄陂区疾病预防控制中心	420116003-2013-00001	589	18	男性	汉族	学生	本县区	420116012		转诊	2012-12-17	2013-01-03	17			湖北省武汉市黄陂区	武汉市黄陂区疾病预防控制中心	湖北省武汉市黄陂区	武汉市黄陂区疾病预防控制中心			2013-01-04 10	继发	病原学阴性		汪亮	2013-01-04	新患者	初治		2013-01-04							治疗	湖北省武汉市黄陂区	武汉市黄陂区姚家集街道卫生院		完成疗程
		590	普通病案	湖北省武汉市洪山区	洪山区疾病预防控制中心	湖北省武汉市洪山区	洪山区疾病预防控制中心	420111016-2013-00013	590	19	女性	汉族	学生	本县区	420111002		转诊	2012-12-15	2012-12-24	9	阴性	2013-01-05	湖北省武汉市洪山区	洪山区疾病预防控制中心	湖北省武汉市洪山区	洪山区疾病预防控制中心			2013-01-05 08	继发	病原学阴性		李仁惠	2013-01-05	新患者	初治		2013-01-05							治疗	湖北省武汉市洪山区	洪山区疾病预防控制中心		完成疗程
		591	普通病案	湖北省武汉市洪山区	洪山区疾病预防控制中心	湖北省武汉市洪山区	洪山区疾病预防控制中心	420111016-2013-00006	591	20	男性	汉族	学生	本县区	420111002		转诊	2012-12-23	2012-12-31	8	阴性	2013-01-05	湖北省武汉市洪山区	洪山区疾病预防控制中心	湖北省武汉市洪山区	洪山区疾病预防控制中心			2013-01-05 08	继发	病原学阴性		李仁惠	2013-01-05	新患者	初治		2013-01-05							治疗	湖北省武汉市洪山区	洪山区疾病预防控制中心		完成疗程
		592	普通病案	湖北省武汉市洪山区	洪山区疾病预防控制中心	湖北省武汉市洪山区	洪山区疾病预防控制中心	420111016-2013-00017	592	21	男性	汉族	学生	本县区	420111002		转诊	2012-12-06	2012-12-20	14	阴性	2013-01-05	湖北省武汉市洪山区	洪山区疾病预防控制中心	湖北省武汉市洪山区	洪山区疾病预防控制中心			2013-01-05 08	继发	病原学阴性		吴杰	2013-01-05	新患者	初治		2013-01-05							治疗	湖北省武汉市洪山区	洪山区疾病预防控制中心		完成疗程
		593	普通病案	湖北省武汉市洪山区	洪山区疾病预防控制中心	湖北省武汉市洪山区	洪山区疾病预防控制中心	420111016-2013-00009	593	21	男性	汉族	学生	本县区	420111001		转诊	2012-12-09	2012-12-27	18	阴性	2013-01-05	湖北省武汉市洪山区	洪山区疾病预防控制中心	湖北省武汉市洪山区	洪山区疾病预防控制中心			2013-01-05 08	继发	病原学阳性		李仁惠	2013-01-05	新患者	初治		2013-01-05							治疗	湖北省武汉市洪山区	洪山区珞南街理工大社区卫生服务中心		治愈
		594	普通病案	湖北省武汉市洪山区	洪山区疾病预防控制中心	湖北省武汉市洪山区	洪山区疾病预防控制中心	420111016-2013-00008	594	19	男性	汉族	学生	本县区	420111001		转诊	2012-12-22	2012-12-28	6	阴性	2013-01-05	湖北省武汉市洪山区	洪山区疾病预防控制中心	湖北省武汉市洪山区	洪山区疾病预防控制中心			2013-01-05 08	继发	病原学阴性		李仁惠	2013-01-05	新患者	初治		2013-01-05							治疗	湖北省武汉市洪山区	洪山区珞南街华中师范大学医院		完成疗程
		595	普通病案	湖北省武汉市洪山区	洪山区疾病预防控制中心	湖北省武汉市洪山区	洪山区疾病预防控制中心	420111016-2013-00001	595	22	男性	汉族	学生	本县区	420111002		转诊	2012-12-20	2012-12-25	5	阴性	2013-01-05	湖北省武汉市洪山区	洪山区疾病预防控制中心	湖北省武汉市洪山区	洪山区疾病预防控制中心			2013-01-05 09	继发	病原学阴性		李仁惠	2013-01-05	新患者	初治		2013-01-05							治疗	湖北省武汉市洪山区	洪山区疾病预防控制中心		完成疗程
		596	普通病案	湖北省武汉市洪山区	洪山区疾病预防控制中心	湖北省武汉市洪山区	洪山区疾病预防控制中心	420111016-2013-00012	596	23	女性	汉族	学生	本县区	420111002		转诊	2012-12-05	2012-12-21	16	阴性	2013-01-05	湖北省武汉市洪山区	洪山区疾病预防控制中心	湖北省武汉市洪山区	洪山区疾病预防控制中心			2013-01-05 08	继发	病原学阴性		吴杰	2013-01-05	新患者	初治		2013-01-05							治疗	湖北省武汉市洪山区	洪山区疾病预防控制中心		完成疗程
		597	普通病案	湖北省武汉市武昌区	武昌区疾病预防控制中心	湖北省武汉市武昌区	武昌区疾病预防控制中心	420106010-2013-00002	597	21	男性	汉族	学生	本县区	420106013		转诊	2012-12-11	2012-12-25	14	阴性	2013-01-06	湖北省武汉市武昌区	武昌区疾病预防控制中心	湖北省武汉市武昌区	武昌区疾病预防控制中心			2013-01-06 08	继发	病原学阳性		刘文	2013-01-06	新患者	初治		2013-01-06							治疗				治愈
		598	普通病案	湖北省武汉市硚口区	武汉市结核病防治所	湖北省武汉市硚口区	武汉市结核病防治所	420104019-2013-00017	598	15	女性	汉族	学生	本县区	420104004		转诊	2013-01-02	2013-01-06	4	阴性	2013-01-08	湖北省武汉市硚口区	武汉市结核病防治所	湖北省武汉市硚口区	武汉市结核病防治所			2013-01-07 14	继发	病原学阴性		张秀华	2013-01-07	新患者	初治		2013-01-07							治疗	湖北省武汉市硚口区	武汉市结核病防治所		完成疗程
		599	普通病案	湖北省武汉市青山区	青山区结核病防治所	湖北省武汉市青山区	青山区结核病防治所	420107018-2013-00008	599	22	男性	汉族	学生	本县区	420107006		直接就诊	2012-11-15	2013-01-04	50			湖北省武汉市青山区	青山区结核病防治所	湖北省武汉市青山区	青山区结核病防治所			2013-01-08 15	继发	病原学阳性		郑和平	2013-01-08	新患者	初治		2013-01-08							治疗	湖北省武汉市青山区	青山区结核病防治所		治愈
		600	普通病案	湖北省武汉市洪山区	洪山区疾病预防控制中心	湖北省武汉市洪山区	洪山区疾病预防控制中心	420111016-2013-00020	600	23	男性	汉族	学生	本县区	420111002		转诊	2012-12-23	2012-12-24	1	阴性	2013-01-07	湖北省武汉市洪山区	洪山区疾病预防控制中心	湖北省武汉市洪山区	洪山区疾病预防控制中心			2013-01-08 08	继发	病原学阴性		李仁惠	2013-01-08	新患者	初治		2013-01-08							治疗	湖北省武汉市洪山区	武汉市第三医院光谷院区		完成疗程
		601	普通病案	湖北省武汉市洪山区	洪山区疾病预防控制中心	湖北省武汉市洪山区	洪山区疾病预防控制中心	420111016-2013-00021	601	19	男性	汉族	学生	本县区	420111007		转诊	2012-12-25	2012-12-31	6	阴性	2013-01-07	湖北省武汉市洪山区	洪山区疾病预防控制中心	湖北省武汉市洪山区	洪山区疾病预防控制中心			2013-01-08 08	继发	病原学阴性		李仁惠	2013-01-08	新患者	初治		2013-01-08							治疗	湖北省武汉市洪山区	洪山区洪山街社区卫生服务中心		完成疗程
		602	普通病案	湖北省武汉市蔡甸区	武汉市蔡甸区疾病预防控制中心	湖北省武汉市蔡甸区	武汉市蔡甸区疾病预防控制中心	420114003-2013-00019	602	24	男性	汉族	学生	本县区	420114001		直接就诊	2013-01-01	2013-01-10	9			湖北省武汉市蔡甸区	武汉市蔡甸区疾病预防控制中心	湖北省武汉市蔡甸区	武汉市蔡甸区疾病预防控制中心			2013-01-10 14	继发	病原学阴性		刘晓燕	2013-01-10	新患者	初治		2013-01-10							治疗	湖北省武汉市蔡甸区	武汉市蔡甸区蔡甸街卫生院		完成疗程
		603	普通病案	湖北省武汉市洪山区	洪山区疾病预防控制中心	湖北省武汉市洪山区	洪山区疾病预防控制中心	420111016-2013-00028	603	20	女性	汉族	学生	本县区	420111008		转诊	2013-01-08	2013-01-09	1	阴性	2013-01-10	湖北省武汉市洪山区	洪山区疾病预防控制中心	湖北省武汉市洪山区	洪山区疾病预防控制中心			2013-01-10 08	继发	病原学阳性		李仁惠	2013-01-10	新患者	初治		2013-01-10							治疗	湖北省武汉市洪山区	洪山区和平街社区卫生服务中心		治愈
		604	普通病案	湖北省武汉市洪山区	洪山区疾病预防控制中心	湖北省武汉市洪山区	洪山区疾病预防控制中心	420111016-2013-00026	604	21	男性	汉族	学生	本县区	420111002		转诊	2013-01-03	2013-01-08	5	阴性	2013-01-10	湖北省武汉市洪山区	洪山区疾病预防控制中心	湖北省武汉市洪山区	洪山区疾病预防控制中心			2013-01-10 08	继发	病原学阴性		李仁惠	2013-01-10	新患者	初治		2013-01-10							治疗	湖北省武汉市洪山区	中国地质大学医院		完成疗程
		605	普通病案	湖北省武汉市硚口区	武汉市结核病防治所	湖北省武汉市硚口区	武汉市结核病防治所	420104019-2013-00025	605	16	男性	汉族	学生	本县区	420104006		转诊	2012-12-29	2013-01-10	12	阴性	2013-01-12	湖北省武汉市硚口区	武汉市结核病防治所	湖北省武汉市硚口区	武汉市结核病防治所			2013-01-11 10	继发	病原学阴性		张秀华	2013-01-11	新患者	初治		2013-01-11							治疗	湖北省武汉市硚口区	武汉市结核病防治所		完成疗程
		606	普通病案	湖北省武汉市硚口区	武汉市结核病防治所	湖北省武汉市硚口区	武汉市结核病防治所	420104019-2013-00024	606	26	女性	汉族	学生	本县区	420104005		转诊	2012-12-21	2013-01-10	20	阴性	2013-01-12	湖北省武汉市硚口区	武汉市结核病防治所	湖北省武汉市硚口区	武汉市结核病防治所			2013-01-11 10	继发	病原学阴性		张秀华	2013-01-11	新患者	初治		2013-01-11							治疗	湖北省武汉市硚口区	武汉市结核病防治所		完成疗程
		607	普通病案	湖北省武汉市武昌区	武昌区疾病预防控制中心	湖北省武汉市武昌区	武昌区疾病预防控制中心	420106010-2013-00031	607	20	男性	汉族	学生	本县区	420106015		直接就诊	2013-01-14	2013-01-15	1	阴性	2013-01-15	湖北省武汉市武昌区	武昌区疾病预防控制中心	湖北省武汉市武昌区	武昌区疾病预防控制中心			2013-01-15 14	继发	病原学阳性		刘文	2013-01-15	新患者	初治		2013-01-15							治疗				治愈
		608	普通病案	湖北省武汉市东西湖区	东西湖区结核病防治所	湖北省武汉市东西湖区	东西湖区结核病防治所	420112019-2013-00004	608	18	男性	汉族	学生	本县区	420112001		转诊	2013-01-01	2013-01-14	13	阴性	2013-01-15	湖北省武汉市东西湖区	东西湖区结核病防治所	湖北省武汉市东西湖区	东西湖区结核病防治所			2013-01-15 16	继发	病原学阴性		孟刚	2013-01-15	新患者	初治		2013-01-15							治疗	湖北省武汉市东西湖区	东西湖区吴家山街社区卫生服务中心		完成疗程
		609	普通病案	湖北省武汉市新洲区	新洲区疾病预防控制中心	湖北省武汉市新洲区	新洲区疾病预防控制中心	420117002-2013-00010	609	16	男性	汉族	学生	本县区	420117005		转诊	2012-12-20	2013-01-16	27	阴性	2013-01-16	湖北省武汉市新洲区	新洲区疾病预防控制中心	湖北省武汉市新洲区	新洲区疾病预防控制中心			2013-01-16 14	继发	病原学阴性		杨丹	2013-01-16	新患者	初治		2013-01-16							治疗	湖北省武汉市新洲区	新洲区李集街卫生院		完成疗程
		610	普通病案	湖北省武汉市硚口区	武汉市结核病防治所	湖北省武汉市硚口区	武汉市结核病防治所	420104019-2013-00030	610	20	女性	汉族	学生	本县区	420104005		追踪	2012-12-27	2013-01-15	19	阴性	2013-01-17	湖北省武汉市硚口区	武汉市结核病防治所	湖北省武汉市硚口区	武汉市结核病防治所			2013-01-16 09	继发	病原学阴性		张秀华	2013-01-16	新患者	初治		2013-01-16							治疗	湖北省武汉市硚口区	武汉市结核病防治所		完成疗程
		611	普通病案	湖北省武汉市江岸区	江岸区疾病预防控制中心	湖北省武汉市江岸区	江岸区疾病预防控制中心	420102000-2013-00011	611	18	女性	汉族	学生	本市其它县区	420102011		转诊	2012-12-05	2013-01-05	31	阴性	2013-01-05	湖北省武汉市江岸区	江岸区疾病预防控制中心	湖北省武汉市江岸区	江岸区疾病预防控制中心			2013-01-18 14	继发	病原学阴性		赵丽	2013-01-18	新患者	初治		2013-01-18							治疗	湖北省武汉市江岸区	江岸区新村街社区卫生服务中心		完成疗程
		612	普通病案	湖北省武汉市洪山区	洪山区疾病预防控制中心	湖北省武汉市洪山区	洪山区疾病预防控制中心	420111016-2013-00042	612	20	女性	汉族	学生	本县区	420111002		转诊	2012-07-07	2013-01-18	195	阴性	2013-01-18	湖北省武汉市洪山区	洪山区疾病预防控制中心	湖北省武汉市洪山区	洪山区疾病预防控制中心			2013-01-18 16	继发	病原学阴性		吴杰	2013-01-18	新患者	初治		2013-01-18							治疗	湖北省武汉市洪山区	洪山区关山街华中科技大学医院		完成疗程
		613	普通病案	湖北省武汉市洪山区	洪山区疾病预防控制中心	湖北省武汉市洪山区	洪山区疾病预防控制中心	420111016-2013-00041	613	22	女性	汉族	学生	本县区	420111002		转诊	2012-06-10	2013-01-18	222	阴性	2013-01-18	湖北省武汉市洪山区	洪山区疾病预防控制中心	湖北省武汉市洪山区	洪山区疾病预防控制中心			2013-01-18 16	继发	病原学阴性		李仁惠	2013-01-18	新患者	初治		2013-01-18							治疗	湖北省武汉市洪山区	洪山区关山街华中科技大学医院		完成疗程
		614	普通病案	湖北省武汉市洪山区	洪山区疾病预防控制中心	湖北省武汉市洪山区	洪山区疾病预防控制中心	420111016-2013-00036	614	23	男性	汉族	学生	本县区	420111006		转诊	2013-01-15	2013-01-16	1	阴性	2013-01-18	湖北省武汉市洪山区	洪山区疾病预防控制中心	湖北省武汉市洪山区	洪山区疾病预防控制中心			2013-01-18 15	继发	病原学阴性		李仁惠	2013-01-18	新患者	初治		2013-01-18							治疗	湖北省武汉市洪山区	洪山区疾病预防控制中心		完成疗程
		615	普通病案	湖北省武汉市硚口区	武汉市结核病防治所	湖北省武汉市硚口区	武汉市结核病防治所	420104019-2013-00034	615	17	男性	汉族	学生	本县区	420104006		追踪	2013-01-01	2013-01-20	19	阴性	2013-01-22	湖北省武汉市硚口区	武汉市结核病防治所	湖北省武汉市硚口区	武汉市结核病防治所			2013-01-21 10	继发	病原学阳性		张秀华	2013-01-21	新患者	初治		2013-01-21							治疗	湖北省武汉市硚口区	武汉市结核病防治所		治愈
		616	普通病案	湖北省武汉市硚口区	武汉市结核病防治所	湖北省武汉市硚口区	武汉市结核病防治所	420104019-2013-00036	616	26	男性	汉族	学生	本县区	420104005		转诊	2012-12-22	2013-01-21	30	阴性	2013-01-23	湖北省武汉市硚口区	武汉市结核病防治所	湖北省武汉市硚口区	武汉市结核病防治所			2013-01-22 09	继发	病原学阴性		张秀华	2013-01-22	新患者	初治		2013-01-22							治疗	湖北省武汉市硚口区	武汉市结核病防治所		完成疗程
		617	普通病案	湖北省武汉市洪山区	洪山区疾病预防控制中心	湖北省武汉市洪山区	洪山区疾病预防控制中心	420111016-2013-00048	617	25	男性	汉族	学生	本县区	420111002		转诊	2013-01-20	2013-01-21	1	阴性	2013-01-23	湖北省武汉市洪山区	洪山区疾病预防控制中心	湖北省武汉市洪山区	洪山区疾病预防控制中心			2013-01-23 08	继发	病原学阴性		吴杰	2013-01-23	新患者	初治		2013-01-23							治疗	湖北省武汉市洪山区	武汉市第三医院光谷院区		完成疗程
		618	普通病案	湖北省武汉市洪山区	洪山区疾病预防控制中心	湖北省武汉市洪山区	洪山区疾病预防控制中心	420111016-2013-00047	618	17	男性	汉族	学生	本县区	420111002		转诊	2013-01-09	2013-01-21	12	阴性	2013-01-23	湖北省武汉市洪山区	洪山区疾病预防控制中心	湖北省武汉市洪山区	洪山区疾病预防控制中心			2013-01-23 08	继发	病原学阴性		李仁惠	2013-01-23	新患者	初治		2013-01-23							治疗	湖北省武汉市洪山区	武汉市第三医院光谷院区		完成疗程
		619	普通病案	湖北省武汉市武昌区	武昌区疾病预防控制中心	湖北省武汉市武昌区	武昌区疾病预防控制中心	420106010-2013-00039	619	19	男性	汉族	学生	本市其它县区	420106013		转诊	2013-01-05	2013-01-08	3	阴性	2013-01-24	湖北省武汉市武昌区	武昌区疾病预防控制中心	湖北省武汉市武昌区	武昌区疾病预防控制中心			2013-01-24 09	继发	病原学阳性		刘文	2013-01-24	新患者	初治		2013-01-24							治疗				治愈
		620	普通病案	湖北省武汉市黄陂区	武汉市黄陂区疾病预防控制中心	湖北省武汉市黄陂区	武汉市黄陂区疾病预防控制中心	420116003-2013-00034	620	20	女性	汉族	学生	本市其它县区	420116009		追踪	2012-11-26	2013-01-28	63			湖北省武汉市黄陂区	武汉市黄陂区疾病预防控制中心	湖北省武汉市黄陂区	武汉市黄陂区疾病预防控制中心			2013-01-28 08	继发	病原学阴性		汪亮	2013-01-28	新患者	初治		2013-01-28							治疗	湖北省武汉市黄陂区	武汉市黄陂区王家河街道卫生院		完成疗程
		621	普通病案	湖北省武汉市洪山区	洪山区疾病预防控制中心	湖北省武汉市洪山区	洪山区疾病预防控制中心	420111016-2013-00053	621	20	女性	汉族	学生	本县区	420111004		转诊	2013-01-19	2013-01-25	6	阴性	2013-01-28	湖北省武汉市洪山区	洪山区疾病预防控制中心	湖北省武汉市洪山区	洪山区疾病预防控制中心			2013-01-28 08	继发	病原学阴性		李仁惠	2013-01-28	新患者	初治		2013-01-28							治疗	湖北省武汉市洪山区	武汉市洪山区张家湾街社区卫生中心		完成疗程
		622	普通病案	湖北省武汉市洪山区	洪山区疾病预防控制中心	湖北省武汉市洪山区	洪山区疾病预防控制中心	420111016-2013-00052	622	25	男性	汉族	学生	本县区	420111003		转诊	2013-01-18	2013-01-23	5	阴性	2013-01-28	湖北省武汉市洪山区	洪山区疾病预防控制中心	湖北省武汉市洪山区	洪山区疾病预防控制中心			2013-01-28 08	继发	病原学阴性		吴杰	2013-01-28	新患者	初治		2013-01-28							治疗	湖北省武汉市洪山区	湖北工业大学医院		完成疗程
		623	普通病案	湖北省武汉市东湖高新技术开发区	武汉东湖新技术开发区九峰街社区卫生服务中心	湖北省武汉市东湖高新技术开发区	武汉东湖新技术开发区九峰街社区卫生服务中心	420192005-2013-01006	623	16	男性	汉族	学生	本县区	420192005		转诊	2012-12-31	2013-01-23	23			湖北省武汉市东湖高新技术开发区	武汉东湖新技术开发区九峰街社区卫生服务中心	湖北省武汉市东湖高新技术开发区	武汉东湖新技术开发区九峰街社区卫生服务中心			2013-01-29 08	继发	病原学阴性		龚聪	2013-01-29	新患者	初治		2013-01-29							治疗				完成疗程
		624	普通病案	湖北省武汉市硚口区	武汉市结核病防治所	湖北省武汉市硚口区	武汉市结核病防治所	420104019-2013-00041	624	16	男性	汉族	学生	本县区	420104003		直接就诊	2013-01-13	2013-01-28	15	阴性	2013-01-29	湖北省武汉市硚口区	武汉市结核病防治所	湖北省武汉市硚口区	武汉市结核病防治所			2013-01-29 10	继发	病原学阳性		李春清	2013-01-29	新患者	初治		2013-01-29							治疗	湖北省武汉市硚口区	武汉市结核病防治所		治愈
		625	普通病案	湖北省武汉市江岸区	江岸区疾病预防控制中心	湖北省武汉市江岸区	江岸区疾病预防控制中心	420102000-2013-00028	625	20	男性	汉族	学生	本县区	420102009		转诊	2013-01-16	2013-01-21	5			湖北省武汉市江岸区	江岸区疾病预防控制中心	湖北省武汉市江岸区	江岸区疾病预防控制中心			2013-01-30 09	继发	病原学阴性		王莹	2013-01-30	新患者	初治		2013-01-30							治疗	湖北省武汉市江岸区	长江航运总医院		完成疗程
		626	普通病案	湖北省武汉市江岸区	江岸区疾病预防控制中心	湖北省武汉市江岸区	江岸区疾病预防控制中心	420102000-2013-00027	626	21	男性	汉族	学生	本县区	420102015		转诊	2012-12-19	2013-01-08	20			湖北省武汉市江岸区	江岸区疾病预防控制中心	湖北省武汉市江岸区	江岸区疾病预防控制中心			2013-01-30 09	继发	病原学阳性		张少军	2013-01-30	新患者	初治		2013-01-30							治疗	湖北省武汉市江岸区	长江航运总医院		治愈
		627	普通病案	湖北省武汉市汉阳区	武汉市汉阳区结核病防治所	湖北省武汉市汉阳区	武汉市汉阳区结核病防治所	420105012-2013-00025	627	16	男性	汉族	学生	本县区	420105009		追踪	2013-01-07	2013-01-10	3	阴性	2013-01-11	湖北省武汉市汉阳区	武汉市汉阳区结核病防治所	湖北省武汉市汉阳区	武汉市汉阳区结核病防治所			2013-02-01 08	继发	病原学阴性		王长武	2013-02-01	新患者	初治	2013-03-11	2013-02-01							治疗	湖北省武汉市汉阳区	武汉市汉阳区二桥街社区卫生服务中心		完成疗程
		628	普通病案	湖北省武汉市江汉区	武汉市江汉区疾病预防控制中心	湖北省武汉市江汉区	武汉市江汉区疾病预防控制中心	420103013-2013-00025	628	17	男性	汉族	学生	本县区	420103001		转诊	2013-01-20	2013-01-24	4	阴性	2013-01-24	湖北省武汉市江汉区	武汉市江汉区疾病预防控制中心	湖北省武汉市江汉区	武汉市江汉区疾病预防控制中心			2013-02-01 08	继发	病原学阴性		杨澄清卢勇	2013-02-01	新患者	初治		2013-02-01							治疗	湖北省武汉市江汉区	江汉区民族街社区卫生服务中心		完成疗程
		629	普通病案	湖北省武汉市洪山区	洪山区疾病预防控制中心	湖北省武汉市洪山区	洪山区疾病预防控制中心	420111016-2013-00058	629	18	男性	汉族	学生	本县区	420111002		转诊	2013-01-15	2013-01-28	13	阴性	2013-02-01	湖北省武汉市洪山区	洪山区疾病预防控制中心	湖北省武汉市洪山区	洪山区疾病预防控制中心			2013-02-01 08	继发	病原学阴性		吴杰	2013-02-01	新患者	初治		2013-02-01							治疗	湖北省武汉市洪山区	洪山区关山街华中科技大学医院		完成疗程
		630	普通病案	湖北省武汉市洪山区	洪山区疾病预防控制中心	湖北省武汉市洪山区	洪山区疾病预防控制中心	420111016-2013-00061	630	23	男性	汉族	学生	本县区	420111002		转诊	2013-01-02	2013-01-28	26	阴性	2013-02-01	湖北省武汉市洪山区	洪山区疾病预防控制中心	湖北省武汉市洪山区	洪山区疾病预防控制中心			2013-02-01 08	继发	病原学阴性		李仁惠	2013-02-01	新患者	初治		2013-02-01							治疗	湖北省武汉市洪山区	洪山区疾病预防控制中心		完成疗程
		631	普通病案	湖北省武汉市洪山区	洪山区疾病预防控制中心	湖北省武汉市洪山区	洪山区疾病预防控制中心	420111016-2013-00064	631	21	男性	汉族	学生	本县区	420111007		转诊	2013-01-15	2013-01-27	12	阴性	2013-02-01	湖北省武汉市洪山区	洪山区疾病预防控制中心	湖北省武汉市洪山区	洪山区疾病预防控制中心			2013-02-01 09	继发	病原学阴性		吴杰	2013-02-01	新患者	初治		2013-02-01							治疗	湖北省武汉市洪山区	洪山区洪山街社区卫生服务中心		完成疗程
		632	普通病案	湖北省武汉市江夏区	武汉市江夏区疾病预防控制中心	湖北省武汉市江夏区	武汉市江夏区疾病预防控制中心	420115008-2013-00047	632	16	男性	汉族	学生	本县区	420115002		转诊	2013-01-25	2013-02-03	9			湖北省武汉市江夏区	武汉市江夏区疾病预防控制中心	湖北省武汉市江夏区	武汉市江夏区疾病预防控制中心			2013-02-04 10	继发	病原学阴性		胡医生	2013-02-04	新患者	初治		2013-02-04							治疗	湖北省武汉市江夏区	武汉市江夏区金口社区卫生服务中心		完成疗程
		633	普通病案	湖北省武汉市洪山区	洪山区疾病预防控制中心	湖北省武汉市洪山区	洪山区疾病预防控制中心	420111016-2013-00075	633	21	男性	汉族	学生	本县区	420111007		转诊	2012-12-07	2013-02-02	57	阴性	2013-02-04	湖北省武汉市洪山区	洪山区疾病预防控制中心	湖北省武汉市洪山区	洪山区疾病预防控制中心			2013-02-04 08	继发	病原学阴性		李仁惠	2013-02-04	新患者	初治		2013-02-04							治疗	湖北省武汉市洪山区	洪山区洪山街社区卫生服务中心		完成疗程
		634	普通病案	湖北省武汉市洪山区	洪山区疾病预防控制中心	湖北省武汉市洪山区	洪山区疾病预防控制中心	420111016-2013-00069	634	26	女性	汉族	学生	本县区	420111003		转诊	2013-01-19	2013-01-31	12	阴性	2013-02-04	湖北省武汉市洪山区	洪山区疾病预防控制中心	湖北省武汉市洪山区	洪山区疾病预防控制中心			2013-02-04 09	继发	病原学阴性		吴杰	2013-02-04	新患者	初治		2013-02-04							治疗	湖北省武汉市洪山区	洪山区狮子山街华中农业大学医院		完成疗程
		635	普通病案	湖北省武汉市洪山区	洪山区疾病预防控制中心	湖北省武汉市洪山区	洪山区疾病预防控制中心	420111016-2013-00076	635	18	女性	汉族	学生	本县区	420111001		转诊	2012-11-01	2013-02-02	93	阴性	2013-02-04	湖北省武汉市洪山区	洪山区疾病预防控制中心	湖北省武汉市洪山区	洪山区疾病预防控制中心			2013-02-04 08	继发	病原学阳性		吴杰	2013-02-04	新患者	初治		2013-02-04							治疗	湖北省武汉市洪山区	武汉市洪山区中医医院		治愈
		636	普通病案	湖北省武汉市青山区	青山区结核病防治所	湖北省武汉市青山区	青山区结核病防治所	420107018-2013-00029	636	17	女性	汉族	学生	本县区	420107006		转诊	2013-01-29	2013-01-30	1			湖北省武汉市青山区	青山区结核病防治所	湖北省武汉市青山区	青山区结核病防治所			2013-02-05 10	继发	病原学阴性		郑和平	2013-02-05	新患者	初治		2013-02-05							治疗	湖北省武汉市青山区	青山区结核病防治所		完成疗程
		637	普通病案	湖北省武汉市汉南区	武汉市汉南区疾病预防控制中心	湖北省武汉市汉南区	武汉市汉南区疾病预防控制中心	420113006-2013-03003	637	17	女性	汉族	学生	本市其它县区	420113096		追踪	2013-01-24	2013-01-28	4	阴性	2013-01-26	湖北省武汉市汉南区	武汉市汉南区疾病预防控制中心	湖北省武汉市汉南区	武汉市汉南区疾病预防控制中心			2013-02-05 09	继发	病原学阴性		黄海	2013-02-05	新患者	初治		2013-02-05							治疗	湖北省武汉市汉南区	武汉市汉南区疾病预防控制中心		完成疗程
		638	普通病案	湖北省武汉市东西湖区	东西湖区结核病防治所	湖北省武汉市东西湖区	东西湖区结核病防治所	420112019-2013-00015	638	18	男性	汉族	学生	本县区	420112007		主动筛查	2013-01-10	2013-02-04	25			湖北省武汉市东西湖区	东西湖区结核病防治所	湖北省武汉市东西湖区	东西湖区结核病防治所			2013-02-06 10	继发	病原学阳性		胡才生	2013-02-06	新患者	初治		2013-02-06							治疗	湖北省武汉市东西湖区	东西湖区径何街卫生院		治愈
		639	普通病案	湖北省武汉市洪山区	洪山区疾病预防控制中心	湖北省武汉市洪山区	洪山区疾病预防控制中心	420111016-2013-00078	639	22	女性	汉族	学生	本县区	420111006		转诊	2013-02-04	2013-02-05	1	阴性	2013-02-08	湖北省武汉市洪山区	洪山区疾病预防控制中心	湖北省武汉市洪山区	洪山区疾病预防控制中心			2013-02-08 09	继发	病原学阴性		吴杰	2013-02-08	新患者	初治		2013-02-08							治疗	湖北省武汉市洪山区	洪山区疾病预防控制中心		完成疗程
		640	普通病案	湖北省武汉市黄陂区	武汉市黄陂区疾病预防控制中心	湖北省武汉市黄陂区	武汉市黄陂区疾病预防控制中心	420116003-2013-00052	640	17	男性	汉族	学生	本市其它县区	420116001		追踪	2013-01-24	2013-02-16	23			湖北省武汉市黄陂区	武汉市黄陂区疾病预防控制中心	湖北省武汉市黄陂区	武汉市黄陂区疾病预防控制中心			2013-02-17 09	继发	病原学阴性		汪亮	2013-02-17	新患者	初治		2013-02-17							治疗	湖北省武汉市黄陂区	武汉市黄陂区环城社区卫生服务中心		完成疗程
		641	普通病案	湖北省武汉市汉阳区	武汉市汉阳区结核病防治所	湖北省武汉市汉阳区	武汉市汉阳区结核病防治所	420105012-2013-00038	641	17	女性	汉族	学生	本县区	420105008		追踪	2013-02-02	2013-02-19	17	阴性	2013-02-01	湖北省武汉市汉阳区	武汉市汉阳区结核病防治所	湖北省武汉市汉阳区	武汉市汉阳区结核病防治所			2013-02-19 11	继发	病原学阳性		黄海医生	2013-02-19	初治失败	复治	2013-04-01	2013-02-19							治疗	湖北省武汉市汉阳区	汉阳区琴断口街社区卫生服务中心		治愈
		642	普通病案	湖北省武汉市汉南区	武汉市汉南区疾病预防控制中心	湖北省武汉市汉南区	武汉市汉南区疾病预防控制中心	420113006-2013-02012	642	18	女性	汉族	学生	本县区	420113096		追踪	2013-01-02	2013-01-09	7	阴性	2013-01-10	湖北省武汉市汉南区	武汉市汉南区疾病预防控制中心	湖北省武汉市汉南区	武汉市汉南区疾病预防控制中心			2013-02-23 08	继发	病原学阴性		聂绪军	2013-02-23	新患者	初治	2013-03-10	2013-02-23							治疗				完成疗程
		643	普通病案	湖北省武汉市东湖高新技术开发区	武汉东湖新技术开发区佛祖岭社区卫生服务中心	湖北省武汉市东湖高新技术开发区	武汉东湖新技术开发区佛祖岭社区卫生服务中心	420192011-2013-01009	643	18	男性	汉族	学生	本县区	420192002		追踪	2013-01-21	2013-02-25	35			湖北省武汉市东湖高新技术开发区	武汉东湖新技术开发区佛祖岭社区卫生服务中心	湖北省武汉市东湖高新技术开发区	武汉东湖新技术开发区佛祖岭社区卫生服务中心			2013-02-25 08	继发	病原学阴性		邱宏	2013-02-25	新患者	初治		2013-02-25							治疗	湖北省武汉市东湖高新技术开发区	武汉东湖新技术开发区佛祖岭社区卫生服务中心		完成疗程
		644	普通病案	湖北省武汉市洪山区	洪山区疾病预防控制中心	湖北省武汉市洪山区	洪山区疾病预防控制中心	420111016-2013-00082	644	20	男性	汉族	学生	本县区	420111001		转诊	2013-02-10	2013-02-20	10	阴性	2013-02-25	湖北省武汉市洪山区	洪山区疾病预防控制中心	湖北省武汉市洪山区	洪山区疾病预防控制中心			2013-02-25 10	继发	病原学阴性		李仁惠	2013-02-25	新患者	初治		2013-02-25							治疗	湖北省武汉市洪山区	洪山区珞南街理工大社区卫生服务中心		完成疗程
		645	普通病案	湖北省武汉市洪山区	洪山区疾病预防控制中心	湖北省武汉市洪山区	洪山区疾病预防控制中心	420111016-2013-00081	645	22	女性	汉族	学生	本县区	420111008		转诊	2013-02-18	2013-02-23	5	阴性	2013-02-25	湖北省武汉市洪山区	洪山区疾病预防控制中心	湖北省武汉市洪山区	洪山区疾病预防控制中心			2013-02-25 09	继发	病原学阴性		李仁惠	2013-02-25	新患者	初治		2013-02-25							治疗	湖北省武汉市洪山区	洪山区和平街社区卫生服务中心		完成疗程
		646	普通病案	湖北省武汉市江夏区	武汉市江夏区疾病预防控制中心	湖北省武汉市江夏区	武汉市江夏区疾病预防控制中心	420115008-2013-00065	646	20	女性	汉族	学生	本省其它地市	420115405		追踪	2013-01-15	2013-02-26	42			湖北省武汉市江夏区	武汉市江夏区疾病预防控制中心	湖北省武汉市江夏区	武汉市江夏区疾病预防控制中心			2013-02-27 10	继发	病原学阴性		艾医生	2013-02-27	新患者	初治		2013-02-27							治疗	湖北省武汉市江夏区	武汉市江夏区经济开发区大桥新区卫生院		完成疗程
		647	普通病案	湖北省武汉市洪山区	洪山区疾病预防控制中心	湖北省武汉市洪山区	洪山区疾病预防控制中心	420111016-2013-00091	647	25	女性	汉族	学生	本县区	420111003		转诊	2013-02-17	2013-02-25	8	阴性	2013-02-27	湖北省武汉市洪山区	洪山区疾病预防控制中心	湖北省武汉市洪山区	洪山区疾病预防控制中心			2013-02-27 08	继发	病原学阴性		吴杰	2013-02-27	新患者	初治		2013-02-27							治疗	湖北省武汉市洪山区	洪山区狮子山街华中农业大学医院		完成疗程
		648	普通病案	湖北省武汉市硚口区	武汉市结核病防治所	湖北省武汉市硚口区	武汉市结核病防治所	420104019-2013-00078	648	22	男性	汉族	学生	本县区	420104005		转诊	2013-02-25	2013-02-27	2	阴性	2013-02-28	湖北省武汉市硚口区	武汉市结核病防治所	湖北省武汉市硚口区	武汉市结核病防治所			2013-02-28 10	继发	病原学阴性		张秀华	2013-02-28	新患者	初治		2013-02-28							治疗	湖北省武汉市硚口区	武汉市结核病防治所		完成疗程
		649	普通病案	湖北省武汉市江汉区	武汉市江汉区疾病预防控制中心	湖北省武汉市江汉区	武汉市江汉区疾病预防控制中心	420103013-2013-00042	649	17	女性	汉族	学生	本县区	420103009		转诊	2013-02-02	2013-02-04	2	阴性	2013-02-22	湖北省武汉市江汉区	武汉市江汉区疾病预防控制中心	湖北省武汉市江汉区	武汉市江汉区疾病预防控制中心			2013-03-04 08	继发	病原学阴性		罗艺缪胜菊	2013-03-04	新患者	初治		2013-03-04							治疗				完成疗程
		650	普通病案	湖北省武汉市洪山区	洪山区疾病预防控制中心	湖北省武汉市洪山区	洪山区疾病预防控制中心	420111016-2013-00098	650	21	男性	汉族	学生	本县区	420111001		转诊	2013-02-16	2013-02-28	12	阴性	2013-03-04	湖北省武汉市洪山区	洪山区疾病预防控制中心	湖北省武汉市洪山区	洪山区疾病预防控制中心			2013-03-04 09	继发	病原学阴性		吴杰	2013-03-04	新患者	初治		2013-03-04							治疗	湖北省武汉市洪山区	洪山区珞南街华中师范大学医院		完成疗程
		651	普通病案	湖北省武汉市洪山区	洪山区疾病预防控制中心	湖北省武汉市洪山区	洪山区疾病预防控制中心	420111016-2013-00092	651	22	女性	汉族	学生	本县区	420111002		转诊	2013-01-06	2013-02-27	52	阴性	2013-03-04	湖北省武汉市洪山区	洪山区疾病预防控制中心	湖北省武汉市洪山区	洪山区疾病预防控制中心			2013-03-04 09	继发	病原学阴性		李仁惠	2013-03-04	新患者	初治		2013-03-04							治疗	湖北省武汉市洪山区	中国地质大学医院		完成疗程
		652	普通病案	湖北省武汉市洪山区	洪山区疾病预防控制中心	湖北省武汉市洪山区	洪山区疾病预防控制中心	420111016-2013-00106	652	20	女性	汉族	学生	本县区	420111002		转诊	2013-01-02	2013-03-07	64	阴性	2013-03-11	湖北省武汉市洪山区	洪山区疾病预防控制中心	湖北省武汉市洪山区	洪山区疾病预防控制中心			2013-03-11 08	继发	病原学阴性		李仁惠	2013-03-11	新患者	初治		2013-03-11							治疗	湖北省武汉市洪山区	洪山区疾病预防控制中心		完成疗程
		653	普通病案	湖北省武汉市硚口区	武汉市结核病防治所	湖北省武汉市硚口区	武汉市结核病防治所	420104019-2013-00094	653	15	男性	汉族	学生	本县区	420104006		转诊	2013-03-06	2013-03-11	5	阴性	2013-03-12	湖北省武汉市硚口区	武汉市结核病防治所	湖北省武汉市硚口区	武汉市结核病防治所			2013-03-12 09	继发	病原学阴性		张秀华	2013-03-12	新患者	初治		2013-03-12							治疗	湖北省武汉市硚口区	武汉市结核病防治所		完成疗程
		654	普通病案	湖北省武汉市硚口区	武汉市结核病防治所	湖北省武汉市硚口区	武汉市结核病防治所	420104019-2013-00095	654	20	男性	汉族	学生	本县区	420104005		转诊	2013-03-06	2013-03-11	5	阴性	2013-03-12	湖北省武汉市硚口区	武汉市结核病防治所	湖北省武汉市硚口区	武汉市结核病防治所			2013-03-12 09	继发	病原学阴性		张秀华	2013-03-12	新患者	初治		2013-03-12							治疗	湖北省武汉市硚口区	武汉市结核病防治所		完成疗程
		655	普通病案	湖北省武汉市武昌区	武昌区疾病预防控制中心	湖北省武汉市武昌区	武昌区疾病预防控制中心	420106010-2013-00110	655	24	男性	汉族	学生	本市其它县区	420106013		追踪	2013-01-06	2013-01-07	1	阴性	2013-03-13	湖北省武汉市武昌区	武昌区疾病预防控制中心	湖北省武汉市武昌区	武昌区疾病预防控制中心			2013-03-13 08	继发	病原学阴性		刘文	2013-03-13	新患者	初治		2013-03-13							治疗				完成疗程
		656	普通病案	湖北省武汉市武昌区	武昌区疾病预防控制中心	湖北省武汉市武昌区	武昌区疾病预防控制中心	420106010-2013-00111	656	21	男性	汉族	学生	本市其它县区	420106008		追踪	2013-01-05	2013-01-07	2	阴性	2013-03-13	湖北省武汉市武昌区	武昌区疾病预防控制中心	湖北省武汉市武昌区	武昌区疾病预防控制中心			2013-03-13 08	继发	病原学阴性		刘文	2013-03-13	新患者	初治		2013-03-13							治疗				完成疗程
		657	普通病案	湖北省武汉市汉阳区	武汉市汉阳区结核病防治所	湖北省武汉市汉阳区	武汉市汉阳区结核病防治所	420105012-2013-00060	657	17	男性	汉族	学生	本县区	420105009		追踪	2013-02-01	2013-03-01	28	阴性	2013-03-01	湖北省武汉市汉阳区	武汉市汉阳区结核病防治所	湖北省武汉市汉阳区	武汉市汉阳区结核病防治所			2013-03-13 09	继发	病原学阴性		王长武	2013-03-13	新患者	初治	2013-05-08	2013-03-13							治疗	湖北省武汉市汉阳区	武汉市汉阳区二桥街社区卫生服务中心		完成疗程
		658	普通病案	湖北省武汉市硚口区	武汉市结核病防治所	湖北省武汉市硚口区	武汉市结核病防治所	420104019-2013-00103	658	17	男性	汉族	学生	本县区	420104006		追踪	2013-03-08	2013-03-12	4	阴性	2013-03-13	湖北省武汉市硚口区	武汉市结核病防治所	湖北省武汉市硚口区	武汉市结核病防治所			2013-03-13 09	继发	病原学阳性		张秀华	2013-03-13	新患者	初治		2013-03-13							治疗	湖北省武汉市硚口区	武汉市结核病防治所		治愈
		659	普通病案	湖北省武汉市洪山区	洪山区疾病预防控制中心	湖北省武汉市洪山区	洪山区疾病预防控制中心	420111016-2013-00114	659	19	女性	汉族	学生	本县区	420111005		转诊	2013-02-17	2013-03-07	18	阴性	2013-03-13	湖北省武汉市洪山区	洪山区疾病预防控制中心	湖北省武汉市洪山区	洪山区疾病预防控制中心			2013-03-13 09	继发	病原学阴性		李仁惠	2013-03-13	新患者	初治		2013-03-13							治疗	湖北省武汉市洪山区	洪山区和平街社区卫生服务中心		完成疗程
		660	普通病案	湖北省武汉市洪山区	洪山区疾病预防控制中心	湖北省武汉市洪山区	洪山区疾病预防控制中心	420111016-2013-00115	660	22	男性	汉族	学生	本县区	420111002		转诊	2013-01-17	2013-03-11	53	阴性	2013-03-13	湖北省武汉市洪山区	洪山区疾病预防控制中心	湖北省武汉市洪山区	洪山区疾病预防控制中心			2013-03-13 09	继发	病原学阴性		李仁惠	2013-03-13	新患者	初治		2013-03-13							治疗	湖北省武汉市洪山区	洪山区疾病预防控制中心		完成疗程
		661	普通病案	湖北省武汉市洪山区	洪山区疾病预防控制中心	湖北省武汉市洪山区	洪山区疾病预防控制中心	420111016-2013-00116	661	19	男性	汉族	学生	本县区	420111004		转诊	2013-03-01	2013-03-11	10	阴性	2013-03-13	湖北省武汉市洪山区	洪山区疾病预防控制中心	湖北省武汉市洪山区	洪山区疾病预防控制中心			2013-03-13 09	继发	病原学阴性		吴杰	2013-03-13	新患者	初治		2013-03-13							治疗	湖北省武汉市洪山区	武汉市洪山区张家湾街社区卫生中心		完成疗程
		662	普通病案	湖北省武汉市洪山区	洪山区疾病预防控制中心	湖北省武汉市洪山区	洪山区疾病预防控制中心	420111016-2013-00119	662	20	男性	汉族	学生	本县区	420111001		追踪	2013-01-21	2013-02-25	35	阴性	2013-03-14	湖北省武汉市洪山区	洪山区疾病预防控制中心	湖北省武汉市洪山区	洪山区疾病预防控制中心			2013-03-14 08	继发	病原学阴性		吴杰	2013-03-14	新患者	初治		2013-03-14							治疗	湖北省武汉市洪山区	洪山区珞南街华中师范大学医院		完成疗程
		663	普通病案	湖北省武汉市洪山区	洪山区疾病预防控制中心	湖北省武汉市洪山区	洪山区疾病预防控制中心	420111016-2013-00118	663	23	男性	汉族	学生	本县区	420111001		追踪	2012-12-29	2013-02-26	59	阴性	2013-03-14	湖北省武汉市洪山区	洪山区疾病预防控制中心	湖北省武汉市洪山区	洪山区疾病预防控制中心			2013-03-14 08	继发	病原学阴性		吴杰	2013-03-14	新患者	初治		2013-03-14							治疗	湖北省武汉市洪山区	洪山区珞南街华中师范大学医院		完成疗程
		664	普通病案	湖北省武汉市洪山区	洪山区疾病预防控制中心	湖北省武汉市洪山区	洪山区疾病预防控制中心	420111016-2013-00117	664	25	女性	汉族	学生	本县区	420111001		直接就诊	2012-12-20	2013-02-26	68	阴性	2013-03-14	湖北省武汉市洪山区	洪山区疾病预防控制中心	湖北省武汉市洪山区	洪山区疾病预防控制中心			2013-03-14 08	继发	病原学阴性		吴杰	2013-03-14	新患者	初治		2013-03-14							治疗	湖北省武汉市洪山区	洪山区珞南街华中师范大学医院		完成疗程
		665	普通病案	湖北省武汉市武昌区	武昌区疾病预防控制中心	湖北省武汉市武昌区	武昌区疾病预防控制中心	420106010-2013-00118	665	20	男性	汉族	学生	本市其它县区	420106010		追踪	2013-01-09	2013-01-11	2	阴性	2013-03-15	湖北省武汉市武昌区	武昌区疾病预防控制中心	湖北省武汉市武昌区	武昌区疾病预防控制中心			2013-03-15 08	继发	病原学阴性		刘文	2013-03-15	新患者	初治		2013-03-15							治疗				完成疗程
		666	普通病案	湖北省武汉市东西湖区	东西湖区结核病防治所	湖北省武汉市东西湖区	东西湖区结核病防治所	420112019-2013-00032	666	22	男性	汉族	学生	本县区	420112014		追踪	2013-02-11	2013-02-16	5	阴性	2013-03-15	湖北省武汉市东西湖区	东西湖区结核病防治所	湖北省武汉市东西湖区	东西湖区结核病防治所			2013-03-15 14	继发	病原学阴性		孟刚	2013-03-15	新患者	初治		2013-03-15							治疗	湖北省武汉市东西湖区	东西湖区金银湖街卫生院		完成疗程
		667	普通病案	湖北省武汉市洪山区	洪山区疾病预防控制中心	湖北省武汉市洪山区	洪山区疾病预防控制中心	420111016-2013-00127	667	19	女性	汉族	学生	本县区	420111002		转诊	2013-03-09	2013-03-13	4	阴性	2013-03-15	湖北省武汉市洪山区	洪山区疾病预防控制中心	湖北省武汉市洪山区	洪山区疾病预防控制中心			2013-03-15 09	继发	病原学阴性		李仁惠	2013-03-15	新患者	初治		2013-03-15							治疗	湖北省武汉市洪山区	洪山区疾病预防控制中心		完成疗程
		668	普通病案	湖北省武汉市青山区	青山区结核病防治所	湖北省武汉市青山区	青山区结核病防治所	420107018-2013-00049	668	16	男性	汉族	学生	本市其它县区	420107002		追踪	2013-02-20	2013-03-06	14	阴性	2013-03-07	湖北省武汉市青山区	青山区结核病防治所	湖北省武汉市青山区	青山区结核病防治所			2013-03-18 10	继发	病原学阴性		郑和平	2013-03-18	新患者	初治		2013-03-18							治疗	湖北省武汉市青山区	青山区冶金街社区卫生服务中心		完成疗程
		669	普通病案	湖北省武汉市青山区	青山区结核病防治所	湖北省武汉市青山区	青山区结核病防治所	420107018-2013-00050	669	16	男性	汉族	学生	本市其它县区	420107002		追踪	2013-02-02	2013-03-15	41	阴性	2013-03-18	湖北省武汉市青山区	青山区结核病防治所	湖北省武汉市青山区	青山区结核病防治所			2013-03-18 08	继发	病原学阳性		郑和平	2013-03-18	复发	复治		2013-03-18							治疗	湖北省武汉市青山区	青山区冶金街社区卫生服务中心		治愈
		670	普通病案	湖北省武汉市洪山区	洪山区疾病预防控制中心	湖北省武汉市洪山区	洪山区疾病预防控制中心	420111016-2013-00138	670	20	男性	汉族	学生	本县区	420111006		转诊	2013-02-15	2013-03-15	28	阴性	2013-03-18	湖北省武汉市洪山区	洪山区疾病预防控制中心	湖北省武汉市洪山区	洪山区疾病预防控制中心			2013-03-18 09	继发	病原学阴性		吴杰	2013-03-18	新患者	初治		2013-03-18							治疗	湖北省武汉市洪山区	洪山区疾病预防控制中心		完成疗程
		671	普通病案	湖北省武汉市洪山区	洪山区疾病预防控制中心	湖北省武汉市洪山区	洪山区疾病预防控制中心	420111016-2013-00133	671	22	男性	汉族	学生	本县区	420111006		转诊	2013-02-15	2013-03-15	28	阴性	2013-03-18	湖北省武汉市洪山区	洪山区疾病预防控制中心	湖北省武汉市洪山区	洪山区疾病预防控制中心			2013-03-18 08	继发	病原学阴性		李仁惠	2013-03-18	新患者	初治		2013-03-18							治疗	湖北省武汉市洪山区	洪山区疾病预防控制中心		完成疗程
		672	普通病案	湖北省武汉市洪山区	洪山区疾病预防控制中心	湖北省武汉市洪山区	洪山区疾病预防控制中心	420111016-2013-00135	672	25	男性	汉族	学生	本县区	420111001		追踪	2013-02-28	2013-03-04	4	阴性	2013-03-18	湖北省武汉市洪山区	洪山区疾病预防控制中心	湖北省武汉市洪山区	洪山区疾病预防控制中心			2013-03-18 09	继发	病原学阴性		李仁惠	2013-03-18	新患者	初治		2013-03-18							治疗	湖北省武汉市洪山区	洪山区珞南街理工大社区卫生服务中心		完成疗程
		673	普通病案	湖北省武汉市洪山区	洪山区疾病预防控制中心	湖北省武汉市洪山区	洪山区疾病预防控制中心	420111016-2013-00132	673	22	女性	汉族	学生	本县区	420111002		转诊	2013-03-12	2013-03-14	2	阴性	2013-03-18	湖北省武汉市洪山区	洪山区疾病预防控制中心	湖北省武汉市洪山区	洪山区疾病预防控制中心			2013-03-18 09	继发	病原学阴性		李仁惠	2013-03-18	新患者	初治		2013-03-18							治疗	湖北省武汉市洪山区	中国地质大学医院		完成疗程
		674	普通病案	湖北省武汉市江岸区	江岸区疾病预防控制中心	湖北省武汉市江岸区	江岸区疾病预防控制中心	420102000-2013-00080	674	9	男性	汉族	学生	本市其它县区	420102003		追踪	2013-03-08	2013-03-19	11			湖北省武汉市江岸区	江岸区疾病预防控制中心	湖北省武汉市江岸区	江岸区疾病预防控制中心			2013-03-19 10	继发	病原学阳性		王艳秋	2013-03-19	新患者	初治		2013-03-19							治疗	湖北省武汉市江岸区	江岸区车站街社区卫生服务中心		治愈
		675	普通病案	湖北省武汉市洪山区	洪山区疾病预防控制中心	湖北省武汉市洪山区	洪山区疾病预防控制中心	420111016-2013-00143	675	21	女性	汉族	学生	本县区	420111011		转诊	2013-03-11	2013-03-18	7	阴性	2013-03-19	湖北省武汉市洪山区	洪山区疾病预防控制中心	湖北省武汉市洪山区	洪山区疾病预防控制中心			2013-03-19 08	继发	病原学阳性		吴杰	2013-03-19	新患者	初治		2013-03-19							治疗	湖北省武汉市洪山区	武汉市洪山区张家湾街社区卫生中心		治愈
		676	普通病案	湖北省武汉市洪山区	洪山区疾病预防控制中心	湖北省武汉市洪山区	洪山区疾病预防控制中心	420111016-2013-00141	676	18	女性	汉族	学生	本县区	420111002		转诊	2013-01-19	2013-03-15	55	阴性	2013-03-19	湖北省武汉市洪山区	洪山区疾病预防控制中心	湖北省武汉市洪山区	洪山区疾病预防控制中心			2013-03-19 09	继发	病原学阴性		李仁惠	2013-03-19	新患者	初治		2013-03-19							治疗	湖北省武汉市洪山区	中国地质大学医院		完成疗程
		677	普通病案	湖北省武汉市汉南区	武汉市汉南区疾病预防控制中心	湖北省武汉市汉南区	武汉市汉南区疾病预防控制中心	420113006-2013-02017	677	20	男性	汉族	学生	本县区	420113096		追踪	2013-02-07	2013-02-11	4	阴性	2013-02-11	湖北省武汉市汉南区	武汉市汉南区疾病预防控制中心	湖北省武汉市汉南区	武汉市汉南区疾病预防控制中心			2013-03-20 15	继发	病原学阴性		聂绪军	2013-03-20	新患者	初治	2013-04-11	2013-03-20							治疗				完成疗程
		678	普通病案	湖北省武汉市洪山区	洪山区疾病预防控制中心	湖北省武汉市洪山区	洪山区疾病预防控制中心	420111016-2013-00144	678	22	女性	汉族	学生	本县区	420111001		转诊	2012-12-20	2013-01-04	15	阴性	2013-03-21	湖北省武汉市洪山区	洪山区疾病预防控制中心	湖北省武汉市洪山区	洪山区疾病预防控制中心			2013-03-21 08	继发	病原学阴性		吴杰	2013-03-21	新患者	初治		2013-03-21							治疗	湖北省武汉市洪山区	洪山区珞南街华中师范大学医院		完成疗程
		679	普通病案	湖北省武汉市武昌区	武昌区疾病预防控制中心	湖北省武汉市武昌区	武昌区疾病预防控制中心	420106010-2013-00134	679	16	男性	汉族	学生	本县区	420106001		直接就诊	2013-03-19	2013-03-22	3	阴性	2013-03-22	湖北省武汉市武昌区	武昌区疾病预防控制中心	湖北省武汉市武昌区	武昌区疾病预防控制中心			2013-03-22 14	继发	病原学阴性		刘文	2013-03-22	新患者	初治		2013-03-22							治疗				完成疗程
		680	普通病案	湖北省武汉市江夏区	武汉市江夏区疾病预防控制中心	湖北省武汉市江夏区	武汉市江夏区疾病预防控制中心	420115008-2013-00093	680	22	女性	汉族	学生	本县区	420115001		转诊	2013-03-01	2013-03-21	20			湖北省武汉市江夏区	武汉市江夏区疾病预防控制中心	湖北省武汉市江夏区	武汉市江夏区疾病预防控制中心			2013-03-22 15	继发	病原学阴性		艾医生	2013-03-22	新患者	初治		2013-03-22							治疗	湖北省武汉市江夏区	武汉市江夏区纸坊社区卫生服务中心		完成疗程
		681	普通病案	湖北省武汉市洪山区	洪山区疾病预防控制中心	湖北省武汉市洪山区	洪山区疾病预防控制中心	420111016-2013-00148	681	21	男性	汉族	学生	本县区	420111002		转诊	2013-03-09	2013-03-20	11	阴性	2013-03-21	湖北省武汉市洪山区	洪山区疾病预防控制中心	湖北省武汉市洪山区	洪山区疾病预防控制中心			2013-03-22 08	继发	病原学阴性		吴杰	2013-03-22	新患者	初治		2013-03-22							治疗	湖北省武汉市洪山区	洪山区疾病预防控制中心		完成疗程
		682	普通病案	湖北省武汉市洪山区	洪山区疾病预防控制中心	湖北省武汉市洪山区	洪山区疾病预防控制中心	420111016-2013-00146	682	26	女性	汉族	学生	本县区	420111002		转诊	2013-03-01	2013-03-18	17	阴性	2013-03-21	湖北省武汉市洪山区	洪山区疾病预防控制中心	湖北省武汉市洪山区	洪山区疾病预防控制中心			2013-03-22 08	继发	病原学阴性		李仁惠	2013-03-22	新患者	初治		2013-03-22							治疗	湖北省武汉市洪山区	中国地质大学医院		完成疗程
		683	普通病案	湖北省武汉市硚口区	武汉市结核病防治所	湖北省武汉市硚口区	武汉市结核病防治所	420104019-2013-00118	683	18	男性	汉族	学生	本县区	420104012		追踪	2013-03-21	2013-03-24	3	阴性	2013-03-25	湖北省武汉市硚口区	武汉市结核病防治所	湖北省武汉市硚口区	武汉市结核病防治所			2013-03-25 10	继发	病原学阴性		李春清	2013-03-25	新患者	初治		2013-03-25							治疗	湖北省武汉市硚口区	武汉市结核病防治所		完成疗程
		684	普通病案	湖北省武汉市东西湖区	东西湖区结核病防治所	湖北省武汉市东西湖区	东西湖区结核病防治所	420112019-2013-00038	684	20	男性	汉族	学生	本县区	420112001		转诊	2013-02-11	2013-03-20	37			湖北省武汉市东西湖区	东西湖区结核病防治所	湖北省武汉市东西湖区	东西湖区结核病防治所			2013-03-25 10	继发	病原学阳性		孟刚	2013-03-25	新患者	初治		2013-03-25							治疗	湖北省武汉市东西湖区	东西湖区吴家山街社区卫生服务中心		治愈
		685	普通病案	湖北省武汉市洪山区	洪山区疾病预防控制中心	湖北省武汉市洪山区	洪山区疾病预防控制中心	420111016-2013-00152	685	20	男性	汉族	学生	本县区	420111001		转诊	2013-03-02	2013-03-22	20	阴性	2013-03-25	湖北省武汉市洪山区	洪山区疾病预防控制中心	湖北省武汉市洪山区	洪山区疾病预防控制中心			2013-03-25 08	继发	病原学阴性		李仁惠	2013-03-25	新患者	初治		2013-03-25							治疗	湖北省武汉市洪山区	洪山区珞南街理工大社区卫生服务中心		完成疗程
		686	普通病案	湖北省武汉市新洲区	新洲区疾病预防控制中心	湖北省武汉市新洲区	新洲区疾病预防控制中心	420117002-2013-00081	686	18	男性	汉族	学生	本县区	420117008		转诊	2013-03-24	2013-03-26	2	阴性	2013-03-26	湖北省武汉市新洲区	新洲区疾病预防控制中心	湖北省武汉市新洲区	新洲区疾病预防控制中心			2013-03-26 09	继发	病原学阴性		杨丹	2013-03-26	新患者	初治		2013-03-26							治疗	湖北省武汉市新洲区	新洲区旧街中心卫生院		完成疗程
		687	普通病案	湖北省武汉市硚口区	武汉市结核病防治所	湖北省武汉市硚口区	武汉市结核病防治所	420104019-2013-00121	687	18	女性	汉族	学生	本县区	420104002		追踪	2013-03-21	2013-03-25	4	阴性	2013-03-26	湖北省武汉市硚口区	武汉市结核病防治所	湖北省武汉市硚口区	武汉市结核病防治所			2013-03-26 10	继发	病原学阴性		李春清	2013-03-26	新患者	初治		2013-03-26							治疗	湖北省武汉市硚口区	武汉市结核病防治所		完成疗程
		688	普通病案	湖北省武汉市东西湖区	东西湖区结核病防治所	湖北省武汉市东西湖区	东西湖区结核病防治所	420112019-2013-00042	688	18	男性	汉族	学生	本县区	420112001		健康体检	2013-01-20	2013-03-25	64			湖北省武汉市东西湖区	东西湖区结核病防治所	湖北省武汉市东西湖区	东西湖区结核病防治所			2013-03-26 09	继发	病原学阴性		孟刚	2013-03-26	新患者	初治		2013-03-26							治疗	湖北省武汉市东西湖区	东西湖区吴家山街社区卫生服务中心		完成疗程
		689	普通病案	湖北省武汉市武昌区	武昌区疾病预防控制中心	湖北省武汉市武昌区	武昌区疾病预防控制中心	420106010-2013-00148	689	18	男性	汉族	学生	本县区	420106011		直接就诊	2013-03-22	2013-03-27	5	阴性	2013-03-27	湖北省武汉市武昌区	武昌区疾病预防控制中心	湖北省武汉市武昌区	武昌区疾病预防控制中心			2013-03-27 10	继发	病原学阴性		刘文	2013-03-27	新患者	初治		2013-03-27							治疗				完成疗程
		690	普通病案	湖北省武汉市江汉区	武汉市江汉区疾病预防控制中心	湖北省武汉市江汉区	武汉市江汉区疾病预防控制中心	420103013-2013-00075	690	17	女性	汉族	学生	本县区	420103009		转诊	2013-03-16	2013-03-21	5	阴性	2013-03-21	湖北省武汉市江汉区	武汉市江汉区疾病预防控制中心	湖北省武汉市江汉区	武汉市江汉区疾病预防控制中心			2013-03-27 09	继发	病原学阳性		李铭	2013-03-27	新患者	初治		2013-03-27							治疗				治愈
		691	普通病案	湖北省武汉市洪山区	洪山区疾病预防控制中心	湖北省武汉市洪山区	洪山区疾病预防控制中心	420111016-2013-00157	691	22	男性	汉族	学生	本县区	420111006		转诊	2013-02-23	2013-03-24	29	阴性	2013-03-27	湖北省武汉市洪山区	洪山区疾病预防控制中心	湖北省武汉市洪山区	洪山区疾病预防控制中心			2013-03-27 10	继发	病原学阴性		吴杰	2013-03-27	新患者	初治		2013-03-27							治疗	湖北省武汉市洪山区	洪山区疾病预防控制中心		完成疗程
		692	普通病案	湖北省武汉市武昌区	武昌区疾病预防控制中心	湖北省武汉市武昌区	武昌区疾病预防控制中心	420106010-2013-00153	692	18	男性	汉族	学生	本县区	420106002		转诊	2013-03-21	2013-03-21	0	阴性	2013-03-28	湖北省武汉市武昌区	武昌区疾病预防控制中心	湖北省武汉市武昌区	武昌区疾病预防控制中心			2013-03-28 08	继发	病原学阴性		刘文	2013-03-28	新患者	初治		2013-03-28							治疗				完成疗程
		693	普通病案	湖北省武汉市洪山区	洪山区疾病预防控制中心	湖北省武汉市洪山区	洪山区疾病预防控制中心	420111016-2013-00159	693	22	男性	汉族	学生	本县区	420111011		转诊	2013-01-18	2013-03-24	65	阴性	2013-03-28	湖北省武汉市洪山区	洪山区疾病预防控制中心	湖北省武汉市洪山区	洪山区疾病预防控制中心			2013-03-28 08	继发	病原学阴性		李仁惠	2013-03-28	新患者	初治		2013-03-28							治疗	湖北省武汉市洪山区	武汉市洪山区张家湾街社区卫生中心		完成疗程
		694	普通病案	湖北省武汉市洪山区	洪山区疾病预防控制中心	湖北省武汉市洪山区	洪山区疾病预防控制中心	420111016-2013-00160	694	18	女性	汉族	学生	本县区	420111002		转诊	2013-03-01	2013-03-25	24	阴性	2013-03-28	湖北省武汉市洪山区	洪山区疾病预防控制中心	湖北省武汉市洪山区	洪山区疾病预防控制中心			2013-03-28 09	继发	病原学阴性		李仁惠	2013-03-28	新患者	初治		2013-03-28							治疗	湖北省武汉市洪山区	洪山区疾病预防控制中心		完成疗程
		695	普通病案	湖北省武汉市蔡甸区	武汉市蔡甸区疾病预防控制中心	湖北省武汉市蔡甸区	武汉市蔡甸区疾病预防控制中心	420114003-2013-00102	695	16	男性	汉族	学生	本县区	420114004		直接就诊	2013-03-18	2013-03-29	11			湖北省武汉市蔡甸区	武汉市蔡甸区疾病预防控制中心	湖北省武汉市蔡甸区	武汉市蔡甸区疾病预防控制中心			2013-03-29 09	继发	病原学阳性		刘晓燕	2013-03-29	新患者	初治		2013-03-29							治疗	湖北省武汉市蔡甸区	武汉市蔡甸区侏儒街卫生院		治愈
		696	普通病案	湖北省武汉市江夏区	武汉市江夏区疾病预防控制中心	湖北省武汉市江夏区	武汉市江夏区疾病预防控制中心	420115008-2013-00104	696	17	女性	汉族	学生	本县区	420115001		转诊	2013-03-21	2013-03-28	7			湖北省武汉市江夏区	武汉市江夏区疾病预防控制中心	湖北省武汉市江夏区	武汉市江夏区疾病预防控制中心			2013-03-29 00	继发	病原学阴性		艾医生	2013-03-29	新患者	初治		2013-03-29							治疗	湖北省武汉市江夏区	武汉市江夏区纸坊社区卫生服务中心		完成疗程
		697	普通病案	湖北省武汉市硚口区	武汉市结核病防治所	湖北省武汉市硚口区	武汉市结核病防治所	420104019-2013-00132	697	19	女性	汉族	学生	本县区	420104009		转诊	2013-03-10	2013-03-31	21	阴性	2013-04-01	湖北省武汉市硚口区	武汉市结核病防治所	湖北省武汉市硚口区	武汉市结核病防治所			2013-04-01 10	继发	病原学阳性		张秀华	2013-04-01	新患者	初治		2013-04-01							治疗	湖北省武汉市硚口区	武汉市结核病防治所		治愈
		698	普通病案	湖北省武汉市硚口区	武汉市结核病防治所	湖北省武汉市硚口区	武汉市结核病防治所	420104019-2013-00131	698	16	男性	汉族	学生	本县区	420104009		转诊	2013-03-01	2013-03-31	30	阴性	2013-04-01	湖北省武汉市硚口区	武汉市结核病防治所	湖北省武汉市硚口区	武汉市结核病防治所			2013-04-01 10	继发	病原学阳性		张秀华	2013-04-01	新患者	初治		2013-04-01							治疗	湖北省武汉市硚口区	武汉市结核病防治所		治愈
		699	普通病案	湖北省武汉市武昌区	武昌区疾病预防控制中心	湖北省武汉市武昌区	武昌区疾病预防控制中心	420106010-2013-00163	699	18	男性	汉族	学生	本县区	420106009		转诊	2013-03-25	2013-03-25	0	阴性	2013-04-02	湖北省武汉市武昌区	武昌区疾病预防控制中心	湖北省武汉市武昌区	武昌区疾病预防控制中心			2013-04-02 14	继发	病原学阴性		刘文	2013-04-02	新患者	初治		2013-04-02							治疗				完成疗程
		700	普通病案	湖北省武汉市新洲区	新洲区疾病预防控制中心	湖北省武汉市新洲区	新洲区疾病预防控制中心	420117002-2013-00099	700	21	男性	汉族	学生	本县区	420117002		转诊	2013-03-12	2013-04-02	21	阴性	2013-04-02	湖北省武汉市新洲区	新洲区疾病预防控制中心	湖北省武汉市新洲区	新洲区疾病预防控制中心			2013-04-02 09	继发	病原学阴性		马莉	2013-04-02	新患者	初治		2013-04-02							治疗	湖北省武汉市新洲区	新洲区阳逻街卫生院		完成疗程
		701	普通病案	湖北省武汉市汉阳区	武汉市汉阳区结核病防治所	湖北省武汉市汉阳区	武汉市汉阳区结核病防治所	420105012-2013-00085	701	23	男性	汉族	学生	本县区	420105004		转诊	2013-03-18	2013-03-19	1	阴性	2013-04-03	湖北省武汉市汉阳区	武汉市汉阳区结核病防治所	湖北省武汉市汉阳区	武汉市汉阳区结核病防治所			2013-04-03 09	继发	病原学阴性		王长武	2013-04-03	新患者	初治	2013-06-03	2013-04-03							治疗	湖北省武汉市汉阳区	汉阳区晴川街社区卫生服务中心		完成疗程
		702	普通病案	湖北省武汉市汉阳区	武汉市汉阳区结核病防治所	湖北省武汉市汉阳区	武汉市汉阳区结核病防治所	420105012-2013-00078	702	21	男性	汉族	学生	本县区	420105004		转诊	2013-03-01	2013-03-02	1	阴性	2013-03-13	湖北省武汉市汉阳区	武汉市汉阳区结核病防治所	湖北省武汉市汉阳区	武汉市汉阳区结核病防治所			2013-04-03 08	继发	病原学阴性		王长武	2013-04-03	新患者	初治	2013-05-13	2013-04-03							治疗	湖北省武汉市汉阳区	汉阳区晴川街社区卫生服务中心		完成疗程
		703	普通病案	湖北省武汉市硚口区	武汉市结核病防治所	湖北省武汉市硚口区	武汉市结核病防治所	420104019-2013-00136	703	45	男性	汉族	学生	本县区	420104004		转诊	2013-03-16	2013-04-01	16	阴性	2013-04-02	湖北省武汉市硚口区	武汉市结核病防治所	湖北省武汉市硚口区	武汉市结核病防治所			2013-04-02 16	继发	病原学阴性		张秀华	2013-04-03	新患者	初治		2013-04-03							治疗	湖北省武汉市硚口区	武汉市结核病防治所		完成疗程
		704	普通病案	湖北省武汉市硚口区	武汉市结核病防治所	湖北省武汉市硚口区	武汉市结核病防治所	420104019-2013-00138	704	17	男性	汉族	学生	本县区	420104006		转诊	2013-03-26	2013-04-01	6	阴性	2013-04-02	湖北省武汉市硚口区	武汉市结核病防治所	湖北省武汉市硚口区	武汉市结核病防治所			2013-04-02 16	继发	病原学阴性		张秀华	2013-04-03	新患者	初治		2013-04-03							治疗	湖北省武汉市硚口区	武汉市结核病防治所		完成疗程
		705	普通病案	湖北省武汉市洪山区	洪山区疾病预防控制中心	湖北省武汉市洪山区	洪山区疾病预防控制中心	420111016-2013-00165	705	23	男性	汉族	学生	本县区	420111002		转诊	2013-03-27	2013-03-28	1	阴性	2013-04-03	湖北省武汉市洪山区	洪山区疾病预防控制中心	湖北省武汉市洪山区	洪山区疾病预防控制中心			2013-04-03 08	继发	病原学阴性		李仁惠	2013-04-03	新患者	初治		2013-04-03							治疗	湖北省武汉市洪山区	洪山区疾病预防控制中心		完成疗程
		706	普通病案	湖北省武汉市洪山区	洪山区疾病预防控制中心	湖北省武汉市洪山区	洪山区疾病预防控制中心	420111016-2013-00172	706	22	女性	汉族	学生	本县区	420111002		转诊	2013-03-19	2013-03-31	12	阴性	2013-04-03	湖北省武汉市洪山区	洪山区疾病预防控制中心	湖北省武汉市洪山区	洪山区疾病预防控制中心			2013-04-03 09	继发	病原学阴性		李仁惠	2013-04-03	新患者	初治		2013-04-03							治疗	湖北省武汉市洪山区	洪山区疾病预防控制中心		完成疗程
		707	普通病案	湖北省武汉市洪山区	洪山区疾病预防控制中心	湖北省武汉市洪山区	洪山区疾病预防控制中心	420111016-2013-00164	707	21	男性	汉族	学生	本县区	420111002		转诊	2013-03-21	2013-03-29	8	阴性	2013-04-03	湖北省武汉市洪山区	洪山区疾病预防控制中心	湖北省武汉市洪山区	洪山区疾病预防控制中心			2013-04-03 08	继发	病原学阳性		李仁惠	2013-04-03	新患者	初治		2013-04-03							治疗	湖北省武汉市洪山区	武汉市第三医院光谷院区		治愈
		708	普通病案	湖北省武汉市新洲区	新洲区疾病预防控制中心	湖北省武汉市新洲区	新洲区疾病预防控制中心	420117002-2013-00107	708	18	男性	汉族	学生	本县区	420117004		直接就诊	2013-03-30	2013-04-07	8	阴性	2013-04-07	湖北省武汉市新洲区	新洲区疾病预防控制中心	湖北省武汉市新洲区	新洲区疾病预防控制中心			2013-04-07 09	继发	病原学阴性		马莉	2013-04-07	新患者	初治		2013-04-07							治疗	湖北省武汉市新洲区	新洲区汪集中心卫生院		完成疗程
		709	普通病案	湖北省武汉市新洲区	新洲区疾病预防控制中心	湖北省武汉市新洲区	新洲区疾病预防控制中心	420117002-2013-00109	709	24	男性	汉族	学生	本县区	420117001		其它	2013-03-27	2013-04-07	11	阴性	2013-04-07	湖北省武汉市新洲区	新洲区疾病预防控制中心	湖北省武汉市新洲区	新洲区疾病预防控制中心			2013-04-07 10	继发	病原学阴性		邓其军	2013-04-07	新患者	初治		2013-04-07							治疗	湖北省武汉市新洲区	新洲区邾城街卫生院		完成疗程
		710	普通病案	湖北省武汉市江岸区	江岸区疾病预防控制中心	湖北省武汉市江岸区	江岸区疾病预防控制中心	420102000-2013-00122	710	14	女性	汉族	学生	本市其它县区	420102012		转诊	2013-03-10	2013-03-14	4	阴性	2013-03-14	湖北省武汉市江岸区	江岸区疾病预防控制中心	湖北省武汉市江岸区	江岸区疾病预防控制中心			2013-04-08 10	继发	病原学阴性		孙学智	2013-04-08	新患者	初治		2013-04-08							治疗	湖北省武汉市江岸区	江岸区丹水池街社区卫生服务中心		完成疗程
		711	普通病案	湖北省武汉市江岸区	江岸区疾病预防控制中心	湖北省武汉市江岸区	江岸区疾病预防控制中心	420102000-2013-00121	711	19	男性	汉族	学生	本市其它县区	420102003		转诊	2013-03-23	2013-03-23	0	阴性	2013-03-23	湖北省武汉市江岸区	江岸区疾病预防控制中心	湖北省武汉市江岸区	江岸区疾病预防控制中心			2013-04-08 09	继发	病原学阴性		陈国玺	2013-04-08	新患者	初治		2013-04-08							治疗	湖北省武汉市江岸区	江岸区车站街社区卫生服务中心		完成疗程
		712	普通病案	湖北省武汉市江汉区	武汉市江汉区疾病预防控制中心	湖北省武汉市江汉区	武汉市江汉区疾病预防控制中心	420103013-2013-00090	712	17	男性	汉族	学生	本县区	420103007		转诊	2013-03-22	2013-03-27	5	阴性	2013-03-30	湖北省武汉市江汉区	武汉市江汉区疾病预防控制中心	湖北省武汉市江汉区	武汉市江汉区疾病预防控制中心			2013-04-08 08	继发	病原学阴性		连展万建侠	2013-04-08	新患者	初治		2013-04-08							治疗	湖北省武汉市江汉区	江汉区新华街社区卫生服务中心		完成疗程
		713	普通病案	湖北省武汉市江汉区	武汉市江汉区疾病预防控制中心	湖北省武汉市江汉区	武汉市江汉区疾病预防控制中心	420103013-2013-00093	713	19	男性	汉族	学生	本县区	420103013		转诊	2013-03-23	2013-03-27	4	阴性	2013-04-01	湖北省武汉市江汉区	武汉市江汉区疾病预防控制中心	湖北省武汉市江汉区	武汉市江汉区疾病预防控制中心			2013-04-09 08	继发	病原学阴性		杜娟万建侠	2013-04-09	新患者	初治		2013-04-09							治疗	湖北省武汉市江汉区	江汉区汉兴街社区卫生服务中心		完成疗程
		714	普通病案	湖北省武汉市青山区	青山区结核病防治所	湖北省武汉市青山区	青山区结核病防治所	420107018-2013-00068	714	18	男性	汉族	学生	本市其它县区	420107005		追踪	2013-03-22	2013-04-05	14	阴性	2013-04-09	湖北省武汉市青山区	青山区结核病防治所	湖北省武汉市青山区	青山区结核病防治所			2013-04-09 10	继发	病原学阴性		郑和平	2013-04-09	新患者	初治		2013-04-09							治疗	湖北省武汉市青山区	青山区厂前街社区卫生服务中心		完成疗程
		715	普通病案	湖北省武汉市硚口区	武汉市结核病防治所	湖北省武汉市硚口区	武汉市结核病防治所	420104019-2013-00146	715	15	女性	汉族	学生	本县区	420104012		转诊	2013-03-10	2013-04-08	29	阴性	2013-04-09	湖北省武汉市硚口区	武汉市结核病防治所	湖北省武汉市硚口区	武汉市结核病防治所			2013-04-09 10	继发	病原学阳性		李春清	2013-04-09	新患者	初治		2013-04-09							治疗	湖北省武汉市硚口区	武汉市结核病防治所		治愈
		716	普通病案	湖北省武汉市洪山区	洪山区疾病预防控制中心	湖北省武汉市洪山区	洪山区疾病预防控制中心	420111016-2013-00173	716	23	男性	汉族	学生	本县区	420111001		转诊	2013-03-02	2013-04-02	31	阴性	2013-04-09	湖北省武汉市洪山区	洪山区疾病预防控制中心	湖北省武汉市洪山区	洪山区疾病预防控制中心			2013-04-09 08	继发	病原学阴性		李仁惠	2013-04-09	新患者	初治		2013-04-09							治疗	湖北省武汉市洪山区	洪山区珞南街华中师范大学医院		完成疗程
		717	普通病案	湖北省武汉市江岸区	江岸区疾病预防控制中心	湖北省武汉市江岸区	江岸区疾病预防控制中心	420102000-2013-00127	717	17	女性	汉族	学生	本市其它县区	420102007		转诊	2013-03-22	2013-04-01	10	阴性	2013-04-01	湖北省武汉市江岸区	江岸区疾病预防控制中心	湖北省武汉市江岸区	江岸区疾病预防控制中心			2013-04-10 11	继发	病原学阴性		连展	2013-04-10	新患者	初治		2013-04-10							治疗	湖北省武汉市江岸区	江岸区西马街社区卫生服务中心		完成疗程
		718	普通病案	湖北省武汉市江夏区	武汉市江夏区疾病预防控制中心	湖北省武汉市江夏区	武汉市江夏区疾病预防控制中心	420115008-2013-00113	718	17	男性	汉族	学生	本县区	420115001		转诊	2013-03-29	2013-04-09	11			湖北省武汉市江夏区	武汉市江夏区疾病预防控制中心	湖北省武汉市江夏区	武汉市江夏区疾病预防控制中心			2013-04-10 14	继发	病原学阴性		艾医生	2013-04-10	新患者	初治		2013-04-10							治疗	湖北省武汉市江夏区	武汉市江夏区纸坊社区卫生服务中心		完成疗程
		719	普通病案	湖北省武汉市东西湖区	东西湖区结核病防治所	湖北省武汉市东西湖区	东西湖区结核病防治所	420112019-2013-00055	719	18	男性	汉族	学生	本县区	420112004		转诊	2013-03-12	2013-03-28	16			湖北省武汉市东西湖区	东西湖区结核病防治所	湖北省武汉市东西湖区	东西湖区结核病防治所			2013-04-10 14	继发	病原学阴性		孟刚	2013-04-10	新患者	初治		2013-04-10							治疗	湖北省武汉市东西湖区	东西湖区将军路街卫生院		完成疗程
		720	普通病案	湖北省武汉市汉阳区	武汉市汉阳区结核病防治所	湖北省武汉市汉阳区	武汉市汉阳区结核病防治所	420105012-2013-00096	720	18	女性	汉族	学生	本县区	420105005		转诊	2013-03-11	2013-03-20	9	阴性	2013-04-08	湖北省武汉市汉阳区	武汉市汉阳区结核病防治所	湖北省武汉市汉阳区	武汉市汉阳区结核病防治所			2013-04-11 08	继发	病原学阴性		王长武	2013-04-11	新患者	初治	2013-06-07	2013-04-11							治疗	湖北省武汉市汉阳区	汉阳区鹦鹉街社区卫生服务中心		完成疗程
		721	普通病案	湖北省武汉市汉阳区	武汉市汉阳区结核病防治所	湖北省武汉市汉阳区	武汉市汉阳区结核病防治所	420105012-2013-00099	721	16	男性	汉族	学生	本县区	420105005		转诊	2013-03-12	2013-03-25	13	阴性	2013-03-29	湖北省武汉市汉阳区	武汉市汉阳区结核病防治所	湖北省武汉市汉阳区	武汉市汉阳区结核病防治所			2013-04-11 09	继发	病原学阴性		王长武	2013-04-11	新患者	初治	2013-05-29	2013-04-11							治疗	湖北省武汉市汉阳区	汉阳区鹦鹉街社区卫生服务中心		完成疗程
		722	普通病案	湖北省武汉市汉阳区	武汉市汉阳区结核病防治所	湖北省武汉市汉阳区	武汉市汉阳区结核病防治所	420105012-2013-00097	722	18	男性	汉族	学生	本县区	420105010		转诊	2013-03-12	2013-03-18	6	阴性	2013-04-08	湖北省武汉市汉阳区	武汉市汉阳区结核病防治所	湖北省武汉市汉阳区	武汉市汉阳区结核病防治所			2013-04-11 08	继发	病原学阴性		王长武	2013-04-11	新患者	初治	2013-06-07	2013-04-11							治疗	湖北省武汉市汉阳区	汉阳区永丰街社区卫生服务中心		完成疗程
		723	普通病案	湖北省武汉市汉阳区	武汉市汉阳区结核病防治所	湖北省武汉市汉阳区	武汉市汉阳区结核病防治所	420105012-2013-00098	723	17	男性	汉族	学生	本县区	420105010		转诊	2013-03-02	2013-03-18	16	阴性	2013-04-08	湖北省武汉市汉阳区	武汉市汉阳区结核病防治所	湖北省武汉市汉阳区	武汉市汉阳区结核病防治所			2013-04-11 08	继发	病原学阴性		王长武	2013-04-11	新患者	初治	2013-06-07	2013-04-11							治疗	湖北省武汉市汉阳区	汉阳区永丰街社区卫生服务中心		完成疗程
		724	普通病案	湖北省武汉市汉阳区	武汉市汉阳区结核病防治所	湖北省武汉市汉阳区	武汉市汉阳区结核病防治所	420105012-2013-00095	724	18	男性	汉族	学生	本县区	420105006		转诊	2013-03-12	2013-03-18	6	阴性	2013-04-08	湖北省武汉市汉阳区	武汉市汉阳区结核病防治所	湖北省武汉市汉阳区	武汉市汉阳区结核病防治所			2013-04-11 08	继发	病原学阴性		王长武	2013-04-11	新患者	初治	2013-06-07	2013-04-11							治疗	湖北省武汉市汉阳区	汉阳区洲头街社区卫生服务中心		完成疗程
		725	普通病案	湖北省武汉市武昌区	武昌区疾病预防控制中心	湖北省武汉市武昌区	武昌区疾病预防控制中心	420106010-2013-00183	725	20	女性	汉族	学生	本市其它县区	420106013		转诊	2013-03-25	2013-04-02	8	阴性	2013-04-12	湖北省武汉市武昌区	武昌区疾病预防控制中心	湖北省武汉市武昌区	武昌区疾病预防控制中心			2013-04-12 09	继发	病原学阳性		刘文	2013-04-12	新患者	初治		2013-04-12							治疗				治愈
		726	普通病案	湖北省武汉市江汉区	武汉市江汉区疾病预防控制中心	湖北省武汉市江汉区	武汉市江汉区疾病预防控制中心	420103013-2013-00102	726	18	男性	汉族	学生	本县区	420103012		转诊	2013-03-23	2013-03-28	5	阴性	2013-04-03	湖北省武汉市江汉区	武汉市江汉区疾病预防控制中心	湖北省武汉市江汉区	武汉市江汉区疾病预防控制中心			2013-04-12 08	继发	病原学阴性		杨澄清	2013-04-12	新患者	初治		2013-04-12							治疗	湖北省武汉市江汉区	江汉区常青街社区卫生服务中心		完成疗程
		727	普通病案	湖北省武汉市黄陂区	武汉市黄陂区疾病预防控制中心	湖北省武汉市黄陂区	武汉市黄陂区疾病预防控制中心	420116003-2013-00155	727	18	男性	汉族	学生	本县区	420116002		转诊	2013-03-31	2013-04-12	12			湖北省武汉市黄陂区	武汉市黄陂区疾病预防控制中心	湖北省武汉市黄陂区	武汉市黄陂区疾病预防控制中心			2013-04-12 10	继发	病原学阴性		汪亮	2013-04-12	新患者	初治		2013-04-12							治疗	湖北省武汉市黄陂区	武汉市黄陂区祁家湾街道卫生院		完成疗程
		728	普通病案	湖北省武汉市洪山区	洪山区疾病预防控制中心	湖北省武汉市洪山区	洪山区疾病预防控制中心	420111016-2013-00180	728	19	女性	汉族	学生	本县区	420111002		转诊	2013-04-01	2013-04-07	6	阴性	2013-04-12	湖北省武汉市洪山区	洪山区疾病预防控制中心	湖北省武汉市洪山区	洪山区疾病预防控制中心			2013-04-12 08	继发	病原学阳性		李仁惠	2013-04-12	新患者	初治		2013-04-12							治疗	湖北省武汉市洪山区	洪山区疾病预防控制中心		治愈
		729	普通病案	湖北省武汉市新洲区	新洲区疾病预防控制中心	湖北省武汉市新洲区	新洲区疾病预防控制中心	420117002-2013-00122	729	18	男性	汉族	学生	本县区	420117001		健康体检	2013-04-12	2013-04-15	3	阴性	2013-04-15	湖北省武汉市新洲区	新洲区疾病预防控制中心	湖北省武汉市新洲区	新洲区疾病预防控制中心			2013-04-15 10	继发	病原学阴性		杨丹	2013-04-15	新患者	初治		2013-04-15							治疗	湖北省武汉市新洲区	新洲区邾城街卫生院		完成疗程
		730	普通病案	湖北省武汉市江汉区	武汉市江汉区疾病预防控制中心	湖北省武汉市江汉区	武汉市江汉区疾病预防控制中心	420103013-2013-00108	730	18	男性	汉族	学生	本县区	420103013		转诊	2013-03-28	2013-03-28	0	阴性	2013-04-06	湖北省武汉市江汉区	武汉市江汉区疾病预防控制中心	湖北省武汉市江汉区	武汉市江汉区疾病预防控制中心			2013-04-15 08	继发	病原学阴性		万建侠李全	2013-04-15	新患者	初治		2013-04-15							治疗	湖北省武汉市江汉区	江汉区汉兴街社区卫生服务中心		完成疗程
		731	普通病案	湖北省武汉市江汉区	武汉市江汉区疾病预防控制中心	湖北省武汉市江汉区	武汉市江汉区疾病预防控制中心	420103013-2013-00104	731	19	男性	汉族	学生	本县区	420103004		追踪	2013-04-07	2013-04-12	5			湖北省武汉市江汉区	武汉市江汉区疾病预防控制中心	湖北省武汉市江汉区	武汉市江汉区疾病预防控制中心			2013-04-15 08	继发	病原学阴性		文汉礼	2013-04-15	新患者	初治		2013-04-15							治疗	湖北省武汉市江汉区	江汉区民权街社区卫生服务中心		完成疗程
		732	普通病案	湖北省武汉市武昌区	武昌区疾病预防控制中心	湖北省武汉市武昌区	武昌区疾病预防控制中心	420106010-2013-00193	732	21	男性	汉族	学生	本县区	420106003		转诊	2013-01-20	2013-02-02	13	阴性	2013-04-16	湖北省武汉市武昌区	武昌区疾病预防控制中心	湖北省武汉市武昌区	武昌区疾病预防控制中心			2013-04-16 08	继发	病原学阴性		刘文	2013-04-16	新患者	初治		2013-04-16							治疗				完成疗程
		733	普通病案	湖北省武汉市黄陂区	武汉市黄陂区疾病预防控制中心	湖北省武汉市黄陂区	武汉市黄陂区疾病预防控制中心	420116003-2013-00161	733	23	男性	汉族	学生	本县区	420116002		转诊	2013-03-20	2013-04-16	27			湖北省武汉市黄陂区	武汉市黄陂区疾病预防控制中心	湖北省武汉市黄陂区	武汉市黄陂区疾病预防控制中心			2013-04-16 08	继发	病原学阴性		汪亮	2013-04-16	新患者	初治		2013-04-16							治疗	湖北省武汉市黄陂区	武汉市黄陂区祁家湾街道卫生院		完成疗程
		734	普通病案	湖北省武汉市东西湖区	东西湖区结核病防治所	湖北省武汉市东西湖区	东西湖区结核病防治所	420112019-2013-00061	734	17	女性	汉族	学生	本县区	420112001		转诊	2013-03-29	2013-03-31	2	阴性	2013-04-16	湖北省武汉市东西湖区	东西湖区结核病防治所	湖北省武汉市东西湖区	东西湖区结核病防治所			2013-04-16 14	继发	病原学阴性		孟刚	2013-04-16	新患者	初治		2013-04-16							治疗	湖北省武汉市东西湖区	东西湖区吴家山街社区卫生服务中心		完成疗程
		735	普通病案	湖北省武汉市洪山区	洪山区疾病预防控制中心	湖北省武汉市洪山区	洪山区疾病预防控制中心	420111016-2013-00187	735	25	女性	汉族	学生	本县区	420111003		转诊	2013-04-11	2013-04-12	1	阴性	2013-04-16	湖北省武汉市洪山区	洪山区疾病预防控制中心	湖北省武汉市洪山区	洪山区疾病预防控制中心			2013-04-16 08	继发	病原学阳性		李仁惠	2013-04-16	新患者	初治		2013-04-16							治疗	湖北省武汉市洪山区	洪山区狮子山街华中农业大学医院		治愈
		736	普通病案	湖北省武汉市洪山区	洪山区疾病预防控制中心	湖北省武汉市洪山区	洪山区疾病预防控制中心	420111016-2013-00185	736	21	男性	汉族	学生	本县区	420111001		转诊	2013-04-05	2013-04-10	5	阴性	2013-04-16	湖北省武汉市洪山区	洪山区疾病预防控制中心	湖北省武汉市洪山区	洪山区疾病预防控制中心			2013-04-16 08	继发	病原学阴性		李仁惠	2013-04-16	新患者	初治		2013-04-16							治疗	湖北省武汉市洪山区	洪山区珞南街理工大社区卫生服务中心		完成疗程
		737	普通病案	湖北省武汉市汉阳区	武汉市汉阳区结核病防治所	湖北省武汉市汉阳区	武汉市汉阳区结核病防治所	420105012-2013-00109	737	17	男性	汉族	学生	本县区	420105006		追踪	2013-03-12	2013-03-25	13	阴性	2013-04-12	湖北省武汉市汉阳区	武汉市汉阳区结核病防治所	湖北省武汉市汉阳区	武汉市汉阳区结核病防治所			2013-04-17 11	继发	病原学阴性		王长武	2013-04-17	新患者	初治	2013-06-12	2013-04-17							治疗	湖北省武汉市汉阳区	汉阳区洲头街社区卫生服务中心		完成疗程
		738	普通病案	湖北省武汉市汉阳区	武汉市汉阳区结核病防治所	湖北省武汉市汉阳区	武汉市汉阳区结核病防治所	420105012-2013-00108	738	18	男性	汉族	学生	本县区	420105008		追踪	2013-03-12	2013-03-25	13	阴性	2013-04-11	湖北省武汉市汉阳区	武汉市汉阳区结核病防治所	湖北省武汉市汉阳区	武汉市汉阳区结核病防治所			2013-04-17 11	继发	病原学阴性		王长武	2013-04-17	新患者	初治	2013-06-11	2013-04-17							治疗	湖北省武汉市汉阳区	汉阳区琴断口街社区卫生服务中心		完成疗程
		739	普通病案	湖北省武汉市青山区	青山区结核病防治所	湖北省武汉市青山区	青山区结核病防治所	420107018-2013-00072	739	18	男性	汉族	学生	本县区	420107999		转诊	2013-04-01	2013-04-15	14			湖北省武汉市青山区	青山区结核病防治所	湖北省武汉市青山区	青山区结核病防治所			2013-04-18 15	继发	病原学阴性		郑和平	2013-04-18	新患者	初治		2013-04-18							治疗	湖北省武汉市青山区	青山区结核病防治所		完成疗程
		740	普通病案	湖北省武汉市青山区	青山区结核病防治所	湖北省武汉市青山区	青山区结核病防治所	420107018-2013-00073	740	24	男性	布依族	学生	其他省	420107004		转诊	2013-04-11	2013-04-17	6			湖北省武汉市青山区	青山区结核病防治所	湖北省武汉市青山区	青山区结核病防治所			2013-04-18 09	继发	病原学阴性		郑和平	2013-04-18	新患者	初治		2013-04-18							治疗	湖北省武汉市青山区	青山区结核病防治所		完成疗程
		741	普通病案	湖北省武汉市洪山区	洪山区疾病预防控制中心	湖北省武汉市洪山区	洪山区疾病预防控制中心	420111016-2013-00199	741	24	女性	汉族	学生	本县区	420111001		转诊	2013-04-01	2013-04-15	14	阴性	2013-04-18	湖北省武汉市洪山区	洪山区疾病预防控制中心	湖北省武汉市洪山区	洪山区疾病预防控制中心			2013-04-18 09	继发	病原学阴性		李仁惠	2013-04-18	新患者	初治		2013-04-18							治疗	湖北省武汉市洪山区	洪山区珞南街理工大社区卫生服务中心		完成疗程
		742	普通病案	湖北省武汉市洪山区	洪山区疾病预防控制中心	湖北省武汉市洪山区	洪山区疾病预防控制中心	420111016-2013-00192	742	20	男性	汉族	学生	本县区	420111011		转诊	2013-03-01	2013-04-15	45	阴性	2013-04-18	湖北省武汉市洪山区	洪山区疾病预防控制中心	湖北省武汉市洪山区	洪山区疾病预防控制中心			2013-04-18 08	继发	病原学阴性		李仁惠	2013-04-18	新患者	初治		2013-04-18							治疗	湖北省武汉市洪山区	武汉市洪山区张家湾街社区卫生中心		完成疗程
		743	普通病案	湖北省武汉市洪山区	洪山区疾病预防控制中心	湖北省武汉市洪山区	洪山区疾病预防控制中心	420111016-2013-00198	743	23	男性	汉族	学生	本县区	420111001		转诊	2013-03-30	2013-04-16	17	阴性	2013-04-18	湖北省武汉市洪山区	洪山区疾病预防控制中心	湖北省武汉市洪山区	洪山区疾病预防控制中心			2013-04-18 09	继发	病原学阴性		李仁惠	2013-04-18	新患者	初治		2013-04-18							治疗	湖北省武汉市洪山区	洪山区珞南街华中师范大学医院		完成疗程
		744	普通病案	湖北省武汉市洪山区	洪山区疾病预防控制中心	湖北省武汉市洪山区	洪山区疾病预防控制中心	420111016-2013-00195	744	20	男性	汉族	学生	本县区	420111003		转诊	2013-03-29	2013-04-16	18	阴性	2013-04-18	湖北省武汉市洪山区	洪山区疾病预防控制中心	湖北省武汉市洪山区	洪山区疾病预防控制中心			2013-04-18 09	继发	病原学阴性		吴杰	2013-04-18	新患者	初治		2013-04-18							治疗	湖北省武汉市洪山区	洪山区狮子山街华中农业大学医院		完成疗程
		745	普通病案	湖北省武汉市洪山区	洪山区疾病预防控制中心	湖北省武汉市洪山区	洪山区疾病预防控制中心	420111016-2013-00196	745	21	女性	汉族	学生	本县区	420111007		转诊	2013-04-16	2013-04-17	1	阴性	2013-04-18	湖北省武汉市洪山区	洪山区疾病预防控制中心	湖北省武汉市洪山区	洪山区疾病预防控制中心			2013-04-18 08	继发	病原学阴性		李仁惠	2013-04-18	新患者	初治		2013-04-18							治疗	湖北省武汉市洪山区	洪山区洪山街社区卫生服务中心		完成疗程
		746	普通病案	湖北省武汉市东湖高新技术开发区	武汉东湖新技术开发区九峰街社区卫生服务中心	湖北省武汉市东湖高新技术开发区	武汉东湖新技术开发区九峰街社区卫生服务中心	420192005-2013-01017	746	17	男性	汉族	学生	本市其它县区	420192005		追踪	2013-03-20	2013-03-25	5	阴性	2013-03-22	湖北省武汉市东湖高新技术开发区	武汉东湖新技术开发区九峰街社区卫生服务中心	湖北省武汉市东湖高新技术开发区	武汉东湖新技术开发区九峰街社区卫生服务中心			2013-04-22 10	继发	病原学阴性		龚聪	2013-04-22	新患者	初治		2013-04-22							治疗				完成疗程
		747	普通病案	湖北省武汉市东西湖区	东西湖区结核病防治所	湖北省武汉市东西湖区	东西湖区结核病防治所	420112019-2013-00067	747	21	女性	汉族	学生	本县区	420112001		追踪	2013-03-11	2013-03-21	10	阴性	2013-04-22	湖北省武汉市东西湖区	东西湖区结核病防治所	湖北省武汉市东西湖区	东西湖区结核病防治所			2013-04-22 16	继发	病原学阴性		孟刚	2013-04-22	新患者	初治		2013-04-22							治疗	湖北省武汉市东西湖区	东西湖区吴家山街社区卫生服务中心		完成疗程
		748	普通病案	湖北省武汉市洪山区	洪山区疾病预防控制中心	湖北省武汉市洪山区	洪山区疾病预防控制中心	420111016-2013-00200	748	18	女性	汉族	学生	本县区	420111001		转诊	2013-03-10	2013-04-16	37	阴性	2013-04-22	湖北省武汉市洪山区	洪山区疾病预防控制中心	湖北省武汉市洪山区	洪山区疾病预防控制中心			2013-04-22 09	继发	病原学阴性		李仁惠	2013-04-22	新患者	初治		2013-04-22							治疗	湖北省武汉市洪山区	洪山区珞南街华中师范大学医院		完成疗程
		749	普通病案	湖北省武汉市洪山区	洪山区疾病预防控制中心	湖北省武汉市洪山区	洪山区疾病预防控制中心	420111016-2013-00203	749	24	男性	汉族	学生	本县区	420111002		转诊	2013-02-01	2013-04-17	75	阴性	2013-04-22	湖北省武汉市洪山区	洪山区疾病预防控制中心	湖北省武汉市洪山区	洪山区疾病预防控制中心			2013-04-22 09	继发	病原学阳性		李仁惠	2013-04-22	新患者	初治		2013-04-22							治疗	湖北省武汉市洪山区	中国地质大学医院		其他
		750	普通病案	湖北省武汉市洪山区	洪山区疾病预防控制中心	湖北省武汉市洪山区	洪山区疾病预防控制中心	420111016-2013-00202	750	20	男性	汉族	学生	本县区	420111001		转诊	2013-04-09	2013-04-19	10	阴性	2013-04-22	湖北省武汉市洪山区	洪山区疾病预防控制中心	湖北省武汉市洪山区	洪山区疾病预防控制中心			2013-04-22 09	继发	病原学阴性		吴杰	2013-04-22	新患者	初治		2013-04-22							治疗	湖北省武汉市洪山区	洪山区珞南街理工大社区卫生服务中心		完成疗程
		751	普通病案	湖北省武汉市洪山区	洪山区疾病预防控制中心	湖北省武汉市洪山区	洪山区疾病预防控制中心	420111016-2013-00204	751	23	男性	汉族	学生	本县区	420111002		转诊	2013-04-18	2013-04-19	1	阴性	2013-04-22	湖北省武汉市洪山区	洪山区疾病预防控制中心	湖北省武汉市洪山区	洪山区疾病预防控制中心			2013-04-22 09	继发	病原学阴性		李仁惠	2013-04-22	新患者	初治		2013-04-22							治疗	湖北省武汉市洪山区	洪山区关山街华中科技大学医院		完成疗程
		752	普通病案	湖北省武汉市东西湖区	东西湖区结核病防治所	湖北省武汉市东西湖区	东西湖区结核病防治所	420112019-2013-00070	752	17	男性	汉族	学生	本县区	420112001		转诊	2013-03-25	2013-04-09	15	阴性	2013-04-23	湖北省武汉市东西湖区	东西湖区结核病防治所	湖北省武汉市东西湖区	东西湖区结核病防治所			2013-04-23 16	继发	病原学阴性		孟刚	2013-04-23	新患者	初治		2013-04-23							治疗	湖北省武汉市东西湖区	东西湖区吴家山街社区卫生服务中心		完成疗程
		753	普通病案	湖北省武汉市东湖高新技术开发区	武汉东湖新技术开发区九峰街社区卫生服务中心	湖北省武汉市东湖高新技术开发区	武汉东湖新技术开发区九峰街社区卫生服务中心	420192005-2013-01018	753	20	女性	汉族	学生	本市其它县区	420192004		追踪	2012-12-20	2013-03-21	91	阴性	2013-03-20	湖北省武汉市东湖高新技术开发区	武汉东湖新技术开发区九峰街社区卫生服务中心	湖北省武汉市东湖高新技术开发区	武汉东湖新技术开发区九峰街社区卫生服务中心			2013-04-24 08	继发	病原学阳性		龚聪	2013-04-24	新患者	初治		2013-04-24							治疗				治愈
		754	普通病案	湖北省武汉市江夏区	武汉市江夏区疾病预防控制中心	湖北省武汉市江夏区	武汉市江夏区疾病预防控制中心	420115008-2013-00126	754	18	女性	汉族	学生	本县区	420115013		追踪	2012-12-01	2013-04-23	143			湖北省武汉市江夏区	武汉市江夏区疾病预防控制中心	湖北省武汉市江夏区	武汉市江夏区疾病预防控制中心			2013-04-24 09	继发	病原学阴性		艾医生	2013-04-24	新患者	初治		2013-04-24							治疗	湖北省武汉市江夏区	武汉市江夏区山坡乡卫生院		完成疗程
		755	普通病案	湖北省武汉市江汉区	武汉市江汉区疾病预防控制中心	湖北省武汉市江汉区	武汉市江汉区疾病预防控制中心	420103013-2013-00116	755	17	女性	汉族	学生	本县区	420103008		追踪	2013-03-01	2013-03-04	3	阴性	2013-03-04	湖北省武汉市江汉区	武汉市江汉区疾病预防控制中心	湖北省武汉市江汉区	武汉市江汉区疾病预防控制中心			2013-04-25 08	继发	病原学阴性		丁涵	2013-04-25	新患者	初治		2013-04-25							治疗	湖北省武汉市江汉区	江汉区万松街社区卫生服务中心		完成疗程
		756	普通病案	湖北省武汉市江夏区	武汉市江夏区疾病预防控制中心	湖北省武汉市江夏区	武汉市江夏区疾病预防控制中心	420115008-2013-00134	756	18	女性	汉族	学生	本县区	420115001		转诊	2013-03-17	2013-04-24	38			湖北省武汉市江夏区	武汉市江夏区疾病预防控制中心	湖北省武汉市江夏区	武汉市江夏区疾病预防控制中心			2013-04-25 16	继发	病原学阴性		艾医生	2013-04-25	新患者	初治		2013-04-25							治疗	湖北省武汉市江夏区	武汉市江夏区纸坊社区卫生服务中心		完成疗程
		757	普通病案	湖北省武汉市汉南区	武汉市汉南区疾病预防控制中心	湖北省武汉市汉南区	武汉市汉南区疾病预防控制中心	420113006-2013-02023	757	22	女性	汉族	学生	本县区	420113096		追踪	2013-03-02	2013-03-21	19	阴性	2013-03-22	湖北省武汉市汉南区	武汉市汉南区疾病预防控制中心	湖北省武汉市汉南区	武汉市汉南区疾病预防控制中心			2013-04-25 15	继发	病原学阳性		聂绪军	2013-04-25	新患者	初治	2013-05-22	2013-04-25							治疗	湖北省武汉市汉南区	武汉市汉南区疾病预防控制中心		治愈
		758	普通病案	湖北省武汉市江汉区	武汉市江汉区疾病预防控制中心	湖北省武汉市江汉区	武汉市江汉区疾病预防控制中心	420103013-2013-00120	758	18	男性	汉族	学生	本县区	420103013		追踪	2013-04-18	2013-04-22	4			湖北省武汉市江汉区	武汉市江汉区疾病预防控制中心	湖北省武汉市江汉区	武汉市江汉区疾病预防控制中心			2013-04-26 08	继发	病原学阴性		文汉礼	2013-04-26	新患者	初治		2013-04-26							治疗	湖北省武汉市江汉区	江汉区汉兴街社区卫生服务中心		完成疗程
		759	普通病案	湖北省武汉市江汉区	武汉市江汉区疾病预防控制中心	湖北省武汉市江汉区	武汉市江汉区疾病预防控制中心	420103013-2013-00119	759	20	女性	汉族	学生	本县区	420103009		追踪	2013-04-10	2013-04-12	2	阴性	2013-04-10	湖北省武汉市江汉区	武汉市江汉区疾病预防控制中心	湖北省武汉市江汉区	武汉市江汉区疾病预防控制中心			2013-04-26 08	继发	病原学阴性		连展	2013-04-26	新患者	初治		2013-04-26							治疗				完成疗程
		760	普通病案	湖北省武汉市东西湖区	东西湖区结核病防治所	湖北省武汉市东西湖区	东西湖区结核病防治所	420112019-2013-00077	760	20	女性	汉族	学生	本县区	420112400		追踪	2013-03-04	2013-04-07	34	阴性	2013-04-27	湖北省武汉市东西湖区	东西湖区结核病防治所	湖北省武汉市东西湖区	东西湖区结核病防治所			2013-04-27 09	继发	病原学阴性		孟刚	2013-04-27	新患者	初治		2013-04-27							治疗	湖北省武汉市东西湖区	常青花园社区卫生服务中心		完成疗程
		761	普通病案	湖北省武汉市洪山区	洪山区疾病预防控制中心	湖北省武汉市洪山区	洪山区疾病预防控制中心	420111016-2013-00213	761	23	男性	汉族	学生	本县区	420111002		转诊	2013-04-12	2013-04-24	12	阴性	2013-04-27	湖北省武汉市洪山区	洪山区疾病预防控制中心	湖北省武汉市洪山区	洪山区疾病预防控制中心			2013-04-27 09	继发	病原学阴性		李仁惠	2013-04-27	新患者	初治		2013-04-27							治疗	湖北省武汉市洪山区	洪山区关山街华中科技大学医院		完成疗程
		762	普通病案	湖北省武汉市洪山区	洪山区疾病预防控制中心	湖北省武汉市洪山区	洪山区疾病预防控制中心	420111016-2013-00211	762	20	男性	汉族	学生	本县区	420111001		转诊	2013-04-16	2013-04-24	8	阴性	2013-04-27	湖北省武汉市洪山区	洪山区疾病预防控制中心	湖北省武汉市洪山区	洪山区疾病预防控制中心			2013-04-27 08	继发	病原学阴性		李仁惠	2013-04-27	新患者	初治		2013-04-27							治疗	湖北省武汉市洪山区	武汉市洪山区中医医院		完成疗程
		763	普通病案	湖北省武汉市洪山区	洪山区疾病预防控制中心	湖北省武汉市洪山区	洪山区疾病预防控制中心	420111016-2013-00212	763	22	男性	汉族	学生	本县区	420111002		转诊	2013-03-02	2013-04-26	55	阴性	2013-04-27	湖北省武汉市洪山区	洪山区疾病预防控制中心	湖北省武汉市洪山区	洪山区疾病预防控制中心			2013-04-27 08	继发	病原学阴性		吴杰	2013-04-27	新患者	初治		2013-04-27							治疗	湖北省武汉市洪山区	洪山区关山街华中科技大学医院		完成疗程
		764	普通病案	湖北省武汉市洪山区	洪山区疾病预防控制中心	湖北省武汉市洪山区	洪山区疾病预防控制中心	420111016-2013-00214	764	23	男性	汉族	学生	本县区	420111002		转诊	2013-03-29	2013-04-26	28	阴性	2013-04-27	湖北省武汉市洪山区	洪山区疾病预防控制中心	湖北省武汉市洪山区	洪山区疾病预防控制中心			2013-04-27 09	继发	病原学阴性		李仁惠	2013-04-27	新患者	初治		2013-04-27							治疗	湖北省武汉市洪山区	洪山区疾病预防控制中心		完成疗程
		765	普通病案	湖北省武汉市硚口区	武汉市结核病防治所	湖北省武汉市硚口区	武汉市结核病防治所	420104019-2013-00182	765	13	男性	汉族	学生	本县区	420104012		转诊	2013-04-14	2013-04-27	13	阴性	2013-04-28	湖北省武汉市硚口区	武汉市结核病防治所	湖北省武汉市硚口区	武汉市结核病防治所			2013-04-28 09	继发	病原学阳性		屈世芳	2013-04-28	新患者	初治		2013-04-28							治疗	湖北省武汉市硚口区	武汉市结核病防治所		治愈
		766	普通病案	湖北省武汉市洪山区	洪山区疾病预防控制中心	湖北省武汉市洪山区	洪山区疾病预防控制中心	420111016-2013-00215	766	16	男性	汉族	学生	本县区	420111002		转诊	2013-03-23	2013-03-25	2	阴性	2013-04-28	湖北省武汉市洪山区	洪山区疾病预防控制中心	湖北省武汉市洪山区	洪山区疾病预防控制中心			2013-04-28 10	继发	病原学阴性		吴杰	2013-04-28	新患者	初治		2013-04-28							治疗	湖北省武汉市洪山区	洪山区疾病预防控制中心		完成疗程
		767	普通病案	湖北省武汉市江汉区	武汉市江汉区疾病预防控制中心	湖北省武汉市江汉区	武汉市江汉区疾病预防控制中心	420103013-2013-00125	767	16	男性	汉族	学生	本县区	420103009		转诊	2013-04-02	2013-04-07	5	阴性	2013-04-17	湖北省武汉市江汉区	武汉市江汉区疾病预防控制中心	湖北省武汉市江汉区	武汉市江汉区疾病预防控制中心			2013-05-01 08	继发	病原学阴性		张军叶莉华	2013-05-01	新患者	初治		2013-05-01							治疗				完成疗程
		768	普通病案	湖北省武汉市洪山区	洪山区疾病预防控制中心	湖北省武汉市洪山区	洪山区疾病预防控制中心	420111016-2013-00217	768	22	女性	汉族	学生	本县区	420111003		转诊	2013-04-14	2013-05-01	17	阴性	2013-05-02	湖北省武汉市洪山区	洪山区疾病预防控制中心	湖北省武汉市洪山区	洪山区疾病预防控制中心			2013-05-02 09	继发	病原学阴性		李仁惠	2013-05-02	新患者	初治		2013-05-02							治疗	湖北省武汉市洪山区	洪山区狮子山街华中农业大学医院		完成疗程
		769	普通病案	湖北省武汉市洪山区	洪山区疾病预防控制中心	湖北省武汉市洪山区	洪山区疾病预防控制中心	420111016-2013-00220	769	23	男性	汉族	学生	本县区	420111003		转诊	2013-04-01	2013-04-28	27	阴性	2013-05-02	湖北省武汉市洪山区	洪山区疾病预防控制中心	湖北省武汉市洪山区	洪山区疾病预防控制中心			2013-05-02 09	继发	病原学阴性		李仁惠	2013-05-02	新患者	初治		2013-05-02							治疗	湖北省武汉市洪山区	湖北工业大学医院		完成疗程
		770	普通病案	湖北省武汉市江岸区	江岸区疾病预防控制中心	湖北省武汉市江岸区	江岸区疾病预防控制中心	420102000-2013-00148	770	17	女性	汉族	学生	本市其它县区	420102007		转诊	2013-03-23	2013-04-23	31	阴性	2013-04-23	湖北省武汉市江岸区	江岸区疾病预防控制中心	湖北省武汉市江岸区	江岸区疾病预防控制中心			2013-05-03 11	继发	病原学阳性		罗艺	2013-05-03	新患者	初治		2013-05-03							治疗	湖北省武汉市江岸区	江岸区西马街社区卫生服务中心		治愈
		771	普通病案	湖北省武汉市黄陂区	武汉市黄陂区疾病预防控制中心	湖北省武汉市黄陂区	武汉市黄陂区疾病预防控制中心	420116003-2013-00195	771	18	女性	汉族	学生	本市其它县区	420116001		转诊	2013-04-17	2013-05-02	15			湖北省武汉市黄陂区	武汉市黄陂区疾病预防控制中心	湖北省武汉市黄陂区	武汉市黄陂区疾病预防控制中心			2013-05-03 09	继发	病原学阴性		胡兴吾	2013-05-03	新患者	初治		2013-05-03							治疗	湖北省武汉市黄陂区	武汉市黄陂区前川街道卫生院		完成疗程
		772	普通病案	湖北省武汉市黄陂区	武汉市黄陂区疾病预防控制中心	湖北省武汉市黄陂区	武汉市黄陂区疾病预防控制中心	420116003-2013-00196	772	16	男性	汉族	学生	本县区	420116003		转诊	2013-03-31	2013-05-03	33			湖北省武汉市黄陂区	武汉市黄陂区疾病预防控制中心	湖北省武汉市黄陂区	武汉市黄陂区疾病预防控制中心			2013-05-03 10	继发	病原学阴性		汪亮	2013-05-03	新患者	初治		2013-05-03							治疗	湖北省武汉市黄陂区	武汉市黄陂区横店街道中心卫生院		完成疗程
		773	普通病案	湖北省武汉市江夏区	武汉市江夏区疾病预防控制中心	湖北省武汉市江夏区	武汉市江夏区疾病预防控制中心	420115008-2013-00150	773	19	女性	汉族	学生	本县区	420115010		追踪	2013-02-15	2013-05-05	79	阴性	2013-05-05	湖北省武汉市江夏区	武汉市江夏区疾病预防控制中心	湖北省武汉市江夏区	武汉市江夏区疾病预防控制中心			2013-05-06 15	继发	病原学阴性		艾医生	2013-05-06	新患者	初治		2013-05-06							治疗	湖北省武汉市江夏区	藏龙岛经院社区卫生服务中心		完成疗程
		774	普通病案	湖北省武汉市硚口区	武汉市结核病防治所	湖北省武汉市硚口区	武汉市结核病防治所	420104019-2013-00185	774	14	男性	汉族	学生	本县区	420104003		转诊	2013-04-10	2013-05-05	25	阴性	2013-05-06	湖北省武汉市硚口区	武汉市结核病防治所	湖北省武汉市硚口区	武汉市结核病防治所			2013-05-06 09	继发	病原学阳性		李全	2013-05-06	新患者	初治		2013-05-06							治疗	湖北省武汉市硚口区	武汉市结核病防治所		治愈
		775	普通病案	湖北省武汉市硚口区	武汉市结核病防治所	湖北省武汉市硚口区	武汉市结核病防治所	420104019-2013-00184	775	18	女性	汉族	学生	本县区	420104009		转诊	2013-04-07	2013-05-05	28	阴性	2013-05-06	湖北省武汉市硚口区	武汉市结核病防治所	湖北省武汉市硚口区	武汉市结核病防治所			2013-05-06 09	继发	病原学阳性		李铭	2013-05-06	新患者	初治		2013-05-06							治疗	湖北省武汉市硚口区	武汉市结核病防治所		治愈
		776	普通病案	湖北省武汉市武昌区	武昌区疾病预防控制中心	湖北省武汉市武昌区	武昌区疾病预防控制中心	420106010-2013-00239	776	15	男性	汉族	学生	本县区	420106008		直接就诊	2013-05-02	2013-05-07	5	阴性	2013-05-07	湖北省武汉市武昌区	武昌区疾病预防控制中心	湖北省武汉市武昌区	武昌区疾病预防控制中心			2013-05-07 15	继发	病原学阳性		刘文	2013-05-07	新患者	初治		2013-05-07							治疗				治愈
		777	普通病案	湖北省武汉市武昌区	武昌区疾病预防控制中心	湖北省武汉市武昌区	武昌区疾病预防控制中心	420106010-2013-00236	777	19	男性	汉族	学生	本市其它县区	420106011		转诊	2013-04-22	2013-04-26	4	阴性	2013-05-07	湖北省武汉市武昌区	武昌区疾病预防控制中心	湖北省武汉市武昌区	武昌区疾病预防控制中心			2013-05-07 09	继发	病原学阳性		刘文	2013-05-07	新患者	初治		2013-05-07							治疗				治愈
		778	普通病案	湖北省武汉市洪山区	洪山区疾病预防控制中心	湖北省武汉市洪山区	洪山区疾病预防控制中心	420111016-2013-00226	778	19	男性	汉族	学生	本县区	420111002		转诊	2013-04-17	2013-05-03	16	阴性	2013-05-08	湖北省武汉市洪山区	洪山区疾病预防控制中心	湖北省武汉市洪山区	洪山区疾病预防控制中心			2013-05-08 09	继发	病原学阴性		李仁惠	2013-05-08	新患者	初治		2013-05-08							治疗	湖北省武汉市洪山区	洪山区关山街华中科技大学医院		完成疗程
		779	普通病案	湖北省武汉市黄陂区	武汉市黄陂区疾病预防控制中心	湖北省武汉市黄陂区	武汉市黄陂区疾病预防控制中心	420116003-2013-00211	779	18	男性	汉族	学生	本市其它县区	420116003		追踪	2013-03-27	2013-05-08	42			湖北省武汉市黄陂区	武汉市黄陂区疾病预防控制中心	湖北省武汉市黄陂区	武汉市黄陂区疾病预防控制中心			2013-05-09 08	继发	病原学阳性		汪亮	2013-05-09	新患者	初治		2013-05-09							治疗	湖北省武汉市黄陂区	武汉市黄陂区横店街道中心卫生院		治愈
		780	普通病案	湖北省武汉市洪山区	洪山区疾病预防控制中心	湖北省武汉市洪山区	洪山区疾病预防控制中心	420111016-2013-00232	780	21	女性	汉族	学生	本县区	420111002		转诊	2013-04-01	2013-04-23	22	阴性	2013-05-09	湖北省武汉市洪山区	洪山区疾病预防控制中心	湖北省武汉市洪山区	洪山区疾病预防控制中心			2013-05-09 09	继发	病原学阴性		吴杰	2013-05-09	新患者	初治		2013-05-09							治疗	湖北省武汉市洪山区	中国地质大学医院		完成疗程
		781	普通病案	湖北省武汉市武昌区	武昌区疾病预防控制中心	湖北省武汉市武昌区	武昌区疾病预防控制中心	420106010-2013-00243	781	12	男性	汉族	学生	本县区	420106015		直接就诊	2013-05-02	2013-05-10	8	阴性	2013-05-10	湖北省武汉市武昌区	武昌区疾病预防控制中心	湖北省武汉市武昌区	武昌区疾病预防控制中心			2013-05-10 14	继发	病原学阴性		刘文	2013-05-10	新患者	初治		2013-05-10							治疗				完成疗程
		782	普通病案	湖北省武汉市江岸区	江岸区疾病预防控制中心	湖北省武汉市江岸区	江岸区疾病预防控制中心	420102000-2013-00155	782	17	男性	汉族	学生	本市其它县区	420102015		转诊	2013-03-28	2013-04-17	20	阴性	2013-04-18	湖北省武汉市江岸区	江岸区疾病预防控制中心	湖北省武汉市江岸区	江岸区疾病预防控制中心			2013-05-10 11	血行播散	病原学阴性		陈国玺	2013-05-10	新患者	初治		2013-05-10							治疗	湖北省武汉市江岸区	江岸区花桥街第二社区卫生服务中心		完成疗程
		783	普通病案	湖北省武汉市洪山区	洪山区疾病预防控制中心	湖北省武汉市洪山区	洪山区疾病预防控制中心	420111016-2013-00233	783	19	男性	汉族	学生	本县区	420111006		转诊	2013-04-01	2013-04-18	17	阴性	2013-05-10	湖北省武汉市洪山区	洪山区疾病预防控制中心	湖北省武汉市洪山区	洪山区疾病预防控制中心			2013-05-10 09	继发	病原学阴性		李仁惠	2013-05-10	新患者	初治		2013-05-10							治疗	湖北省武汉市洪山区	洪山区疾病预防控制中心		完成疗程
		784	普通病案	湖北省武汉市洪山区	洪山区疾病预防控制中心	湖北省武汉市洪山区	洪山区疾病预防控制中心	420111016-2013-00235	784	24	男性	汉族	学生	本县区	420111006		转诊	2013-04-25	2013-05-08	13	阴性	2013-05-10	湖北省武汉市洪山区	洪山区疾病预防控制中心	湖北省武汉市洪山区	洪山区疾病预防控制中心			2013-05-10 09	继发	病原学阴性		吴杰	2013-05-10	新患者	初治		2013-05-10							治疗	湖北省武汉市洪山区	洪山区疾病预防控制中心		完成疗程
		785	普通病案	湖北省武汉市洪山区	洪山区疾病预防控制中心	湖北省武汉市洪山区	洪山区疾病预防控制中心	420111016-2013-00236	785	22	男性	汉族	学生	本县区	420111001		转诊	2013-04-29	2013-05-08	9	阴性	2013-05-10	湖北省武汉市洪山区	洪山区疾病预防控制中心	湖北省武汉市洪山区	洪山区疾病预防控制中心			2013-05-10 09	继发	病原学阴性		李仁惠	2013-05-10	新患者	初治		2013-05-10							治疗	湖北省武汉市洪山区	武汉市洪山区中医医院		完成疗程
		786	普通病案	湖北省武汉市江岸区	江岸区疾病预防控制中心	湖北省武汉市江岸区	江岸区疾病预防控制中心	420102000-2013-00159	786	19	男性	汉族	学生	本市其它县区	420102011		转诊	2013-02-02	2013-04-02	59	阴性	2013-04-02	湖北省武汉市江岸区	江岸区疾病预防控制中心	湖北省武汉市江岸区	江岸区疾病预防控制中心			2013-05-13 11	继发	病原学阴性		孙学智	2013-05-13	新患者	初治		2013-05-13							治疗	湖北省武汉市江岸区	江岸区新村街社区卫生服务中心		完成疗程
		787	普通病案	湖北省武汉市东西湖区	东西湖区结核病防治所	湖北省武汉市东西湖区	东西湖区结核病防治所	420112019-2013-00088	787	18	男性	汉族	学生	本县区	420112009		转诊	2013-03-19	2013-05-11	53	阴性	2013-05-15	湖北省武汉市东西湖区	东西湖区结核病防治所	湖北省武汉市东西湖区	东西湖区结核病防治所			2013-05-15 15	继发	病原学阴性		孟刚	2013-05-15	新患者	初治		2013-05-15							治疗	湖北省武汉市东西湖区	东西湖区新沟镇卫生院		完成疗程
		788	普通病案	湖北省武汉市江岸区	江岸区疾病预防控制中心	湖北省武汉市江岸区	江岸区疾病预防控制中心	420102000-2013-00165	788	17	男性	汉族	学生	本市其它县区	420102008		转诊	2013-04-28	2013-05-01	3	阴性	2013-05-01	湖北省武汉市江岸区	江岸区疾病预防控制中心	湖北省武汉市江岸区	江岸区疾病预防控制中心			2013-05-16 14	继发	病原学阴性		刘小玉	2013-05-16	新患者	初治		2013-05-16							治疗	湖北省武汉市江岸区	江岸区球场街社区卫生服务中心		完成疗程
		789	普通病案	湖北省武汉市洪山区	洪山区疾病预防控制中心	湖北省武汉市洪山区	洪山区疾病预防控制中心	420111016-2013-00244	789	22	男性	汉族	学生	本县区	420111002		转诊	2013-04-26	2013-05-13	17	阴性	2013-05-16	湖北省武汉市洪山区	洪山区疾病预防控制中心	湖北省武汉市洪山区	洪山区疾病预防控制中心			2013-05-16 09	继发	病原学阴性		吴杰	2013-05-16	新患者	初治		2013-05-16							治疗	湖北省武汉市洪山区	洪山区关山街华中科技大学医院		完成疗程
		790	普通病案	湖北省武汉市洪山区	洪山区疾病预防控制中心	湖北省武汉市洪山区	洪山区疾病预防控制中心	420111016-2013-00242	790	22	男性	汉族	学生	本县区	420111001		转诊	2013-04-23	2013-05-13	20	阴性	2013-05-16	湖北省武汉市洪山区	洪山区疾病预防控制中心	湖北省武汉市洪山区	洪山区疾病预防控制中心			2013-05-16 09	继发	病原学阴性		吴杰	2013-05-16	新患者	初治		2013-05-16							治疗	湖北省武汉市洪山区	洪山区珞南街理工大社区卫生服务中心		完成疗程
		791	普通病案	湖北省武汉市洪山区	洪山区疾病预防控制中心	湖北省武汉市洪山区	洪山区疾病预防控制中心	420111016-2013-00243	791	22	男性	汉族	学生	本县区	420111002		转诊	2013-05-02	2013-05-13	11	阴性	2013-05-16	湖北省武汉市洪山区	洪山区疾病预防控制中心	湖北省武汉市洪山区	洪山区疾病预防控制中心			2013-05-16 09	继发	病原学阴性		李仁惠	2013-05-16	新患者	初治		2013-05-16							治疗	湖北省武汉市洪山区	洪山区疾病预防控制中心		完成疗程
		792	普通病案	湖北省武汉市洪山区	洪山区疾病预防控制中心	湖北省武汉市洪山区	洪山区疾病预防控制中心	420111016-2013-00245	792	21	男性	汉族	学生	本县区	420111002		转诊	2013-04-12	2013-05-13	31	阴性	2013-05-16	湖北省武汉市洪山区	洪山区疾病预防控制中心	湖北省武汉市洪山区	洪山区疾病预防控制中心			2013-05-16 10	继发	病原学阴性		李仁惠	2013-05-16	新患者	初治		2013-05-16							治疗	湖北省武汉市洪山区	洪山区疾病预防控制中心		完成疗程
		793	普通病案	湖北省武汉市江汉区	武汉市江汉区疾病预防控制中心	湖北省武汉市江汉区	武汉市江汉区疾病预防控制中心	420103013-2013-00142	793	14	男性	汉族	学生	本县区	420103012		追踪	2013-04-28	2013-05-02	4	阴性	2013-04-29	湖北省武汉市江汉区	武汉市江汉区疾病预防控制中心	湖北省武汉市江汉区	武汉市江汉区疾病预防控制中心			2013-05-20 08	继发	病原学阴性		杜鹃	2013-05-20	新患者	初治		2013-05-20							治疗	湖北省武汉市江汉区	江汉区常青街社区卫生服务中心		完成疗程
		794	普通病案	湖北省武汉市江岸区	江岸区疾病预防控制中心	湖北省武汉市江岸区	江岸区疾病预防控制中心	420102000-2013-00174	794	18	男性	汉族	学生	本市其它县区	420102007		转诊	2013-05-05	2013-05-11	6	阴性	2013-05-11	湖北省武汉市江岸区	江岸区疾病预防控制中心	湖北省武汉市江岸区	江岸区疾病预防控制中心			2013-05-21 14	继发	病原学阴性		连展	2013-05-21	新患者	初治		2013-05-21							治疗	湖北省武汉市江岸区	江岸区西马街社区卫生服务中心		完成疗程
		795	普通病案	湖北省武汉市汉阳区	武汉市汉阳区结核病防治所	湖北省武汉市汉阳区	武汉市汉阳区结核病防治所	420105012-2013-00151	795	19	男性	汉族	学生	本县区	420105004		转诊	2013-04-03	2013-04-22	19	阴性	2013-04-22	湖北省武汉市汉阳区	武汉市汉阳区结核病防治所	湖北省武汉市汉阳区	武汉市汉阳区结核病防治所			2013-05-21 10	继发	病原学阳性		王长武	2013-05-21	新患者	初治	2013-06-21	2013-05-21							治疗	湖北省武汉市汉阳区	汉阳区晴川街社区卫生服务中心		治愈
		796	普通病案	湖北省武汉市洪山区	洪山区疾病预防控制中心	湖北省武汉市洪山区	洪山区疾病预防控制中心	420111016-2013-00248	796	19	女性	汉族	学生	本县区	420111004		转诊	2013-05-12	2013-05-16	4	阴性	2013-05-21	湖北省武汉市洪山区	洪山区疾病预防控制中心	湖北省武汉市洪山区	洪山区疾病预防控制中心			2013-05-21 09	继发	病原学阴性		吴杰	2013-05-21	新患者	初治		2013-05-21							治疗	湖北省武汉市洪山区	武汉市洪山区张家湾街社区卫生中心		完成疗程
		797	普通病案	湖北省武汉市洪山区	洪山区疾病预防控制中心	湖北省武汉市洪山区	洪山区疾病预防控制中心	420111016-2013-00250	797	19	女性	汉族	学生	本县区	420111002		转诊	2013-05-01	2013-05-20	19	阴性	2013-05-21	湖北省武汉市洪山区	洪山区疾病预防控制中心	湖北省武汉市洪山区	洪山区疾病预防控制中心			2013-05-21 08	继发	病原学阳性		吴杰	2013-05-21	新患者	初治		2013-05-21							治疗	湖北省武汉市洪山区	洪山区疾病预防控制中心		治愈
		798	普通病案	湖北省武汉市洪山区	洪山区疾病预防控制中心	湖北省武汉市洪山区	洪山区疾病预防控制中心	420111016-2013-00255	798	23	男性	汉族	学生	本县区	420111002		转诊	2013-05-17	2013-05-20	3	阴性	2013-05-21	湖北省武汉市洪山区	洪山区疾病预防控制中心	湖北省武汉市洪山区	洪山区疾病预防控制中心			2013-05-21 08	继发	病原学阳性		吴杰	2013-05-21	新患者	初治		2013-05-21							治疗	湖北省武汉市洪山区	中国地质大学医院		治愈
		799	普通病案	湖北省武汉市洪山区	洪山区疾病预防控制中心	湖北省武汉市洪山区	洪山区疾病预防控制中心	420111016-2013-00253	799	21	男性	汉族	学生	本县区	420111006		转诊	2013-04-17	2013-05-20	33	阴性	2013-05-21	湖北省武汉市洪山区	洪山区疾病预防控制中心	湖北省武汉市洪山区	洪山区疾病预防控制中心			2013-05-21 08	继发	病原学阳性		李仁惠	2013-05-21	新患者	初治		2013-05-21							治疗	湖北省武汉市洪山区	洪山区疾病预防控制中心		治愈
		800	普通病案	湖北省武汉市洪山区	洪山区疾病预防控制中心	湖北省武汉市洪山区	洪山区疾病预防控制中心	420111016-2013-00254	800	20	男性	汉族	学生	本县区	420111002		转诊	2013-05-13	2013-05-16	3	阴性	2013-05-21	湖北省武汉市洪山区	洪山区疾病预防控制中心	湖北省武汉市洪山区	洪山区疾病预防控制中心			2013-05-21 09	继发	病原学阴性		吴杰	2013-05-21	新患者	初治		2013-05-21							治疗	湖北省武汉市洪山区	洪山区疾病预防控制中心		完成疗程
		801	普通病案	湖北省武汉市洪山区	洪山区疾病预防控制中心	湖北省武汉市洪山区	洪山区疾病预防控制中心	420111016-2013-00252	801	25	男性	汉族	学生	本县区	420111002		转诊	2013-04-01	2013-05-19	48	阴性	2013-05-21	湖北省武汉市洪山区	洪山区疾病预防控制中心	湖北省武汉市洪山区	洪山区疾病预防控制中心			2013-05-21 09	继发	病原学阳性		李仁惠	2013-05-21	新患者	初治		2013-05-21							治疗	湖北省武汉市洪山区	洪山区疾病预防控制中心		治愈
		802	普通病案	湖北省武汉市黄陂区	武汉市黄陂区疾病预防控制中心	湖北省武汉市黄陂区	武汉市黄陂区疾病预防控制中心	420116003-2013-00236	802	22	女性	汉族	学生	本市其它县区	420116996		转诊	2013-05-14	2013-05-22	8			湖北省武汉市黄陂区	武汉市黄陂区疾病预防控制中心	湖北省武汉市黄陂区	武汉市黄陂区疾病预防控制中心			2013-05-22 10	继发	病原学阴性		汪亮	2013-05-22	新患者	初治		2013-05-22							治疗	湖北省武汉市黄陂区	武汉盘龙城经济开发区卫生院		完成疗程
		803	普通病案	湖北省武汉市洪山区	洪山区疾病预防控制中心	湖北省武汉市洪山区	洪山区疾病预防控制中心	420111016-2013-00257	803	21	男性	汉族	学生	本县区	420111003		直接就诊	2013-05-09	2013-05-21	12	阴性	2013-05-22	湖北省武汉市洪山区	洪山区疾病预防控制中心	湖北省武汉市洪山区	洪山区疾病预防控制中心			2013-05-22 10	继发	病原学阴性		吴杰	2013-05-22	新患者	初治		2013-05-22							治疗	湖北省武汉市洪山区	武汉市洪山区张家湾街社区卫生中心		完成疗程
		804	普通病案	湖北省武汉市洪山区	洪山区疾病预防控制中心	湖北省武汉市洪山区	洪山区疾病预防控制中心	420111016-2013-00262	804	22	男性	汉族	学生	本县区	420111002		转诊	2013-05-10	2013-05-21	11	阴性	2013-05-27	湖北省武汉市洪山区	洪山区疾病预防控制中心	湖北省武汉市洪山区	洪山区疾病预防控制中心			2013-05-27 10	继发	病原学阴性		李仁惠	2013-05-27	新患者	初治		2013-05-27							治疗	湖北省武汉市洪山区	洪山区关山街华中科技大学医院		完成疗程
		805	普通病案	湖北省武汉市汉南区	武汉市汉南区疾病预防控制中心	湖北省武汉市汉南区	武汉市汉南区疾病预防控制中心	420113006-2013-05006	805	22	女性	汉族	学生	本市其它县区	420113096		转诊	2013-04-23	2013-05-27	34	阴性	2013-05-15	湖北省武汉市汉南区	武汉市汉南区疾病预防控制中心	湖北省武汉市汉南区	武汉市汉南区疾病预防控制中心			2013-05-27 09	继发	病原学阳性		王勇	2013-05-27	新患者	初治		2013-05-27							治疗	湖北省武汉市汉南区	武汉市汉南区疾病预防控制中心		治愈
		806	普通病案	湖北省武汉市洪山区	洪山区疾病预防控制中心	湖北省武汉市洪山区	洪山区疾病预防控制中心	420111016-2013-00260	806	22	男性	汉族	学生	本县区	420111002		转诊	2013-05-17	2013-05-20	3	阴性	2013-05-27	湖北省武汉市洪山区	洪山区疾病预防控制中心	湖北省武汉市洪山区	洪山区疾病预防控制中心			2013-05-27 10	继发	病原学阴性		李仁惠	2013-05-27	新患者	初治		2013-05-27							治疗	湖北省武汉市洪山区	洪山区疾病预防控制中心		完成疗程
		807	普通病案	湖北省武汉市洪山区	洪山区疾病预防控制中心	湖北省武汉市洪山区	洪山区疾病预防控制中心	420111016-2013-00270	807	19	男性	汉族	学生	本县区	420107011		转诊	2013-04-29	2013-05-23	24	阴性	2013-05-27	湖北省武汉市洪山区	洪山区疾病预防控制中心	湖北省武汉市洪山区	洪山区疾病预防控制中心			2013-05-27 10	继发	病原学阴性		李仁惠	2013-05-27	新患者	初治		2013-05-27							治疗	湖北省武汉市青山区	武汉市青山区（武汉化学工业区）八吉府街社区卫生服务中心		完成疗程
		808	普通病案	湖北省武汉市洪山区	洪山区疾病预防控制中心	湖北省武汉市洪山区	洪山区疾病预防控制中心	420111016-2013-00266	808	20	男性	汉族	学生	本县区	420111002		转诊	2013-05-05	2013-05-22	17	阴性	2013-05-27	湖北省武汉市洪山区	洪山区疾病预防控制中心	湖北省武汉市洪山区	洪山区疾病预防控制中心			2013-05-27 10	继发	病原学阴性		吴杰	2013-05-27	新患者	初治		2013-05-27							治疗	湖北省武汉市洪山区	洪山区疾病预防控制中心		完成疗程
		809	普通病案	湖北省武汉市青山区	青山区结核病防治所	湖北省武汉市青山区	青山区结核病防治所	420107018-2013-00106	809	17	男性	汉族	学生	本市其它县区	420107006		转诊	2013-05-22	2013-05-23	1			湖北省武汉市青山区	青山区结核病防治所	湖北省武汉市青山区	青山区结核病防治所			2013-05-28 15	继发	病原学阴性		郑和平	2013-05-28	新患者	初治		2013-05-28							治疗	湖北省武汉市青山区	青山区结核病防治所		完成疗程
		810	普通病案	湖北省武汉市洪山区	洪山区疾病预防控制中心	湖北省武汉市洪山区	洪山区疾病预防控制中心	420111016-2013-00273	810	21	女性	汉族	学生	本县区	420111007		转诊	2013-05-17	2013-05-27	10	阴性	2013-05-28	湖北省武汉市洪山区	洪山区疾病预防控制中心	湖北省武汉市洪山区	洪山区疾病预防控制中心			2013-05-28 09	继发	病原学阴性		李仁惠	2013-05-28	新患者	初治		2013-05-28							治疗	湖北省武汉市洪山区	洪山区洪山街社区卫生服务中心		完成疗程
		811	普通病案	湖北省武汉市江夏区	武汉市江夏区疾病预防控制中心	湖北省武汉市江夏区	武汉市江夏区疾病预防控制中心	420115008-2013-00191	811	14	女性	汉族	学生	本县区	420115002		转诊	2013-05-20	2013-05-24	4	阴性	2013-05-25	湖北省武汉市江夏区	武汉市江夏区疾病预防控制中心	湖北省武汉市江夏区	武汉市江夏区疾病预防控制中心			2013-05-29 14	继发	病原学阳性		田晓春	2013-05-29	新患者	初治	2013-07-29	2013-05-29							治疗	湖北省武汉市江夏区	武汉市江夏区金口社区卫生服务中心		治愈
		812	普通病案	湖北省武汉市硚口区	武汉市结核病防治所	湖北省武汉市硚口区	武汉市结核病防治所	420104019-2013-00231	812	16	男性	汉族	学生	本县区	420104011		转诊	2013-05-20	2013-05-28	8	阴性	2013-05-29	湖北省武汉市硚口区	武汉市结核病防治所	湖北省武汉市硚口区	武汉市结核病防治所			2013-05-29 09	继发	病原学阴性		屈世芳	2013-05-29	新患者	初治		2013-05-29							治疗	湖北省武汉市硚口区	武汉市结核病防治所		完成疗程
		813	普通病案	湖北省武汉市东湖高新技术开发区	武汉东湖新技术开发区九峰街社区卫生服务中心	湖北省武汉市东湖高新技术开发区	武汉东湖新技术开发区九峰街社区卫生服务中心	420192005-2013-01026	813	21	男性	汉族	学生	本县区	420192004		追踪	2013-04-18	2013-04-26	8	阴性	2013-04-27	湖北省武汉市东湖高新技术开发区	武汉东湖新技术开发区九峰街社区卫生服务中心	湖北省武汉市东湖高新技术开发区	武汉东湖新技术开发区九峰街社区卫生服务中心			2013-05-30 09	继发	病原学阳性		龚聪	2013-05-30	新患者	初治		2013-05-30							治疗				治愈
		814	普通病案	湖北省武汉市洪山区	洪山区疾病预防控制中心	湖北省武汉市洪山区	洪山区疾病预防控制中心	420111016-2013-00280	814	22	男性	汉族	学生	本县区	420111002		转诊	2013-04-05	2013-05-16	41	阴性	2013-06-03	湖北省武汉市洪山区	洪山区疾病预防控制中心	湖北省武汉市洪山区	洪山区疾病预防控制中心			2013-06-03 14	继发	病原学阴性		吴杰	2013-06-03	新患者	初治		2013-06-03							治疗	湖北省武汉市洪山区	洪山区疾病预防控制中心		完成疗程
		815	普通病案	湖北省武汉市洪山区	洪山区疾病预防控制中心	湖北省武汉市洪山区	洪山区疾病预防控制中心	420111016-2013-00282	815	26	女性	汉族	学生	本县区	420111001		追踪	2013-05-07	2013-05-19	12	阴性	2013-06-03	湖北省武汉市洪山区	洪山区疾病预防控制中心	湖北省武汉市洪山区	洪山区疾病预防控制中心			2013-06-03 15	继发	病原学阴性		吴杰	2013-06-03	新患者	初治		2013-06-03							治疗	湖北省武汉市洪山区	洪山区珞南街华中师范大学医院		完成疗程
		816	普通病案	湖北省武汉市洪山区	洪山区疾病预防控制中心	湖北省武汉市洪山区	洪山区疾病预防控制中心	420111016-2013-00296	816	22	女性	汉族	学生	本县区	420111001		转诊	2013-05-28	2013-06-03	6	阴性	2013-06-04	湖北省武汉市洪山区	洪山区疾病预防控制中心	湖北省武汉市洪山区	洪山区疾病预防控制中心			2013-06-04 15	继发	病原学阴性		李仁惠	2013-06-04	新患者	初治		2013-06-04							治疗	湖北省武汉市洪山区	武汉市洪山区中医医院		完成疗程
		817	普通病案	湖北省武汉市洪山区	洪山区疾病预防控制中心	湖北省武汉市洪山区	洪山区疾病预防控制中心	420111016-2013-00293	817	22	男性	汉族	学生	本县区	420111002		转诊	2013-05-23	2013-06-03	11	阴性	2013-06-04	湖北省武汉市洪山区	洪山区疾病预防控制中心	湖北省武汉市洪山区	洪山区疾病预防控制中心			2013-06-04 15	继发	病原学阴性		李仁惠	2013-06-04	新患者	初治		2013-06-04							治疗	湖北省武汉市洪山区	洪山区疾病预防控制中心		完成疗程
		818	普通病案	湖北省武汉市洪山区	洪山区疾病预防控制中心	湖北省武汉市洪山区	洪山区疾病预防控制中心	420111016-2013-00297	818	19	女性	汉族	学生	本县区	420111002		转诊	2013-05-24	2013-06-03	10	阴性	2013-06-04	湖北省武汉市洪山区	洪山区疾病预防控制中心	湖北省武汉市洪山区	洪山区疾病预防控制中心			2013-06-04 15	继发	病原学阴性		李仁惠	2013-06-04	新患者	初治		2013-06-04							治疗	湖北省武汉市洪山区	洪山区疾病预防控制中心		完成疗程
		819	普通病案	湖北省武汉市洪山区	洪山区疾病预防控制中心	湖北省武汉市洪山区	洪山区疾病预防控制中心	420111016-2013-00284	819	18	男性	汉族	学生	本县区	420111002		转诊	2013-05-14	2013-05-21	7	阴性	2013-06-04	湖北省武汉市洪山区	洪山区疾病预防控制中心	湖北省武汉市洪山区	洪山区疾病预防控制中心			2013-06-04 14	继发	病原学阴性		李仁惠	2013-06-04	新患者	初治		2013-06-04							治疗	湖北省武汉市洪山区	中国地质大学医院		完成疗程
		820	普通病案	湖北省武汉市洪山区	洪山区疾病预防控制中心	湖北省武汉市洪山区	洪山区疾病预防控制中心	420111016-2013-00287	820	22	男性	汉族	学生	本县区	420111001		转诊	2013-05-19	2013-05-29	10	阴性	2013-06-04	湖北省武汉市洪山区	洪山区疾病预防控制中心	湖北省武汉市洪山区	洪山区疾病预防控制中心			2013-06-04 14	继发	病原学阴性		李仁惠	2013-06-04	新患者	初治		2013-06-04							治疗	湖北省武汉市洪山区	洪山区珞南街理工大社区卫生服务中心		完成疗程
		821	普通病案	湖北省武汉市洪山区	洪山区疾病预防控制中心	湖北省武汉市洪山区	洪山区疾病预防控制中心	420111016-2013-00300	821	21	男性	汉族	学生	本县区	420111002		转诊	2013-05-26	2013-06-04	9	阴性	2013-06-04	湖北省武汉市洪山区	洪山区疾病预防控制中心	湖北省武汉市洪山区	洪山区疾病预防控制中心			2013-06-04 15	继发	病原学阴性		李仁惠	2013-06-04	新患者	初治		2013-06-04							治疗	湖北省武汉市洪山区	中国地质大学医院		完成疗程
		822	普通病案	湖北省武汉市江夏区	武汉市江夏区疾病预防控制中心	湖北省武汉市江夏区	武汉市江夏区疾病预防控制中心	420115008-2013-00208	822	22	男性	汉族	学生	本县区	420115405		转诊	2013-06-01	2013-06-05	4	阴性	2013-06-05	湖北省武汉市江夏区	武汉市江夏区疾病预防控制中心	湖北省武汉市江夏区	武汉市江夏区疾病预防控制中心			2013-06-06 09	继发	病原学阴性		田晓春	2013-06-06	新患者	初治		2013-06-06							治疗	湖北省武汉市江夏区	武汉市江夏区经济开发区大桥新区卫生院		完成疗程
		823	普通病案	湖北省武汉市硚口区	武汉市结核病防治所	湖北省武汉市硚口区	武汉市结核病防治所	420104019-2013-00247	823	24	男性	汉族	学生	本县区	420104005		转诊	2013-05-27	2013-06-05	9	阴性	2013-06-06	湖北省武汉市硚口区	武汉市结核病防治所	湖北省武汉市硚口区	武汉市结核病防治所			2013-06-06 10	继发	病原学阴性		罗艺	2013-06-06	新患者	初治		2013-06-06							治疗	湖北省武汉市硚口区	武汉市结核病防治所		完成疗程
		824	普通病案	湖北省武汉市黄陂区	武汉市黄陂区疾病预防控制中心	湖北省武汉市黄陂区	武汉市黄陂区疾病预防控制中心	420116003-2013-00263	824	18	男性	汉族	学生	本县区	420116005		转诊	2013-06-03	2013-06-07	4			湖北省武汉市黄陂区	武汉市黄陂区疾病预防控制中心	湖北省武汉市黄陂区	武汉市黄陂区疾病预防控制中心			2013-06-07 10	继发	病原学阴性		汪亮	2013-06-07	新患者	初治		2013-06-07							治疗	湖北省武汉市黄陂区	武汉市黄陂区滠口街道卫生院		完成疗程
		825	普通病案	湖北省武汉市洪山区	洪山区疾病预防控制中心	湖北省武汉市洪山区	洪山区疾病预防控制中心	420111016-2013-00301	825	27	男性	汉族	学生	本县区	420111002		转诊	2013-05-27	2013-06-03	7	阴性	2013-06-07	湖北省武汉市洪山区	洪山区疾病预防控制中心	湖北省武汉市洪山区	洪山区疾病预防控制中心			2013-06-07 08	继发	病原学阳性		吴杰	2013-06-07	新患者	初治		2013-06-07							治疗	湖北省武汉市洪山区	洪山区疾病预防控制中心		治愈
		826	普通病案	湖北省武汉市洪山区	洪山区疾病预防控制中心	湖北省武汉市洪山区	洪山区疾病预防控制中心	420111016-2013-00302	826	15	女性	汉族	学生	本县区	420111006		追踪	2013-05-04	2013-05-12	8	阴性	2013-06-08	湖北省武汉市洪山区	洪山区疾病预防控制中心	湖北省武汉市洪山区	洪山区疾病预防控制中心			2013-06-08 08	继发	病原学阴性		吴杰	2013-06-08	新患者	初治		2013-06-08							治疗	湖北省武汉市洪山区	洪山区疾病预防控制中心		完成疗程
		827	普通病案	湖北省武汉市黄陂区	武汉市黄陂区疾病预防控制中心	湖北省武汉市黄陂区	武汉市黄陂区疾病预防控制中心	420116003-2013-00272	827	17	男性	汉族	学生	本县区	420116003		转诊	2013-06-06	2013-06-08	2			湖北省武汉市黄陂区	武汉市黄陂区疾病预防控制中心	湖北省武汉市黄陂区	武汉市黄陂区疾病预防控制中心			2013-06-09 10	继发	病原学阴性		胡兴吾	2013-06-09	新患者	初治		2013-06-09							治疗	湖北省武汉市黄陂区	武汉市黄陂区横店街道中心卫生院		完成疗程
		828	普通病案	湖北省武汉市洪山区	洪山区疾病预防控制中心	湖北省武汉市洪山区	洪山区疾病预防控制中心	420111016-2013-00315	828	23	男性	汉族	学生	本县区	420111002		转诊	2013-05-07	2013-06-07	31	阴性	2013-06-09	湖北省武汉市洪山区	洪山区疾病预防控制中心	湖北省武汉市洪山区	洪山区疾病预防控制中心			2013-06-09 09	继发	病原学阴性		李仁惠	2013-06-09	新患者	初治		2013-06-09							治疗	湖北省武汉市洪山区	洪山区疾病预防控制中心		完成疗程
		829	普通病案	湖北省武汉市洪山区	洪山区疾病预防控制中心	湖北省武汉市洪山区	洪山区疾病预防控制中心	420111016-2013-00305	829	22	男性	汉族	学生	本县区	420111001		转诊	2013-05-24	2013-06-04	11	阴性	2013-06-09	湖北省武汉市洪山区	洪山区疾病预防控制中心	湖北省武汉市洪山区	洪山区疾病预防控制中心			2013-06-09 09	继发	病原学阴性		吴杰	2013-06-09	新患者	初治		2013-06-09							治疗	湖北省武汉市洪山区	武汉市洪山区中医医院		完成疗程
		830	普通病案	湖北省武汉市洪山区	洪山区疾病预防控制中心	湖北省武汉市洪山区	洪山区疾病预防控制中心	420111016-2013-00308	830	25	男性	汉族	学生	本县区	420111002		转诊	2013-05-16	2013-06-06	21	阴性	2013-06-09	湖北省武汉市洪山区	洪山区疾病预防控制中心	湖北省武汉市洪山区	洪山区疾病预防控制中心			2013-06-09 09	继发	病原学阳性		吴杰	2013-06-09	新患者	初治		2013-06-09							治疗	湖北省武汉市洪山区	洪山区疾病预防控制中心		治愈
		831	普通病案	湖北省武汉市洪山区	洪山区疾病预防控制中心	湖北省武汉市洪山区	洪山区疾病预防控制中心	420111016-2013-00316	831	20	女性	汉族	学生	本县区	420111001		转诊	2013-05-26	2013-06-07	12	阴性	2013-06-09	湖北省武汉市洪山区	洪山区疾病预防控制中心	湖北省武汉市洪山区	洪山区疾病预防控制中心			2013-06-09 09	继发	病原学阴性		吴杰	2013-06-09	新患者	初治		2013-06-09							治疗	湖北省武汉市洪山区	洪山区珞南街理工大社区卫生服务中心		完成疗程
		832	普通病案	湖北省武汉市洪山区	洪山区疾病预防控制中心	湖北省武汉市洪山区	洪山区疾病预防控制中心	420111016-2013-00313	832	22	男性	汉族	学生	本县区	420111002		转诊	2013-05-16	2013-06-07	22	阴性	2013-06-09	湖北省武汉市洪山区	洪山区疾病预防控制中心	湖北省武汉市洪山区	洪山区疾病预防控制中心			2013-06-09 09	继发	病原学阴性		李仁惠	2013-06-09	新患者	初治		2013-06-09							治疗	湖北省武汉市洪山区	洪山区疾病预防控制中心		完成疗程
		833	普通病案	湖北省武汉市洪山区	洪山区疾病预防控制中心	湖北省武汉市洪山区	洪山区疾病预防控制中心	420111016-2013-00314	833	29	男性	汉族	学生	本县区	420111002		转诊	2013-05-07	2013-06-07	31	阴性	2013-06-09	湖北省武汉市洪山区	洪山区疾病预防控制中心	湖北省武汉市洪山区	洪山区疾病预防控制中心			2013-06-09 09	继发	病原学阴性		吴杰	2013-06-09	新患者	初治		2013-06-09							治疗	湖北省武汉市洪山区	洪山区关山街华中科技大学医院		完成疗程
		834	普通病案	湖北省武汉市洪山区	洪山区疾病预防控制中心	湖北省武汉市洪山区	洪山区疾病预防控制中心	420111016-2013-00318	834	13	女性	汉族	学生	本县区	420111007		转诊	2013-05-03	2013-06-05	33			湖北省武汉市洪山区	洪山区疾病预防控制中心	湖北省武汉市洪山区	洪山区疾病预防控制中心			2013-06-09 09	继发	病原学阴性		吴杰	2013-06-09	新患者	初治		2013-06-09							治疗	湖北省武汉市洪山区	洪山区洪山街社区卫生服务中心		完成疗程
		835	普通病案	湖北省武汉市洪山区	洪山区疾病预防控制中心	湖北省武汉市洪山区	洪山区疾病预防控制中心	420111016-2013-00317	835	21	男性	汉族	学生	本县区	420111002		转诊	2013-05-09	2013-06-07	29	阴性	2013-06-09	湖北省武汉市洪山区	洪山区疾病预防控制中心	湖北省武汉市洪山区	洪山区疾病预防控制中心			2013-06-09 09	继发	病原学阳性		吴杰	2013-06-09	新患者	初治		2013-06-09							治疗	湖北省武汉市洪山区	洪山区疾病预防控制中心		治愈
		836	普通病案	湖北省武汉市江岸区	江岸区疾病预防控制中心	湖北省武汉市江岸区	江岸区疾病预防控制中心	420102000-2013-00207	836	16	女性	汉族	学生	本市其它县区	420102011		转诊	2013-05-17	2013-05-27	10	未提供		湖北省武汉市江岸区	江岸区疾病预防控制中心	湖北省武汉市江岸区	江岸区疾病预防控制中心			2013-06-13 10	继发	病原学阴性		连展	2013-06-13	新患者	初治		2013-06-13							治疗	湖北省武汉市江岸区	江岸区新村街社区卫生服务中心		完成疗程
		837	普通病案	湖北省武汉市汉阳区	武汉市汉阳区结核病防治所	湖北省武汉市汉阳区	武汉市汉阳区结核病防治所	420105012-2013-00176	837	12	男性	汉族	学生	本县区	420105009		转诊	2013-04-24	2013-05-02	8	阴性	2013-05-02	湖北省武汉市汉阳区	武汉市汉阳区结核病防治所	湖北省武汉市汉阳区	武汉市汉阳区结核病防治所			2013-06-13 15	继发	病原学阳性		王长武	2013-06-13	新患者	初治	2013-07-02	2013-06-13							治疗	湖北省武汉市汉阳区	武汉市汉阳区二桥街社区卫生服务中心		治愈
		838	普通病案	湖北省武汉市江岸区	江岸区疾病预防控制中心	湖北省武汉市江岸区	江岸区疾病预防控制中心	420102000-2013-00213	838	24	女性	汉族	学生	本市其它县区	420102015		转诊	2013-05-15	2013-06-13	29	阴性	2013-06-13	湖北省武汉市江岸区	江岸区疾病预防控制中心	湖北省武汉市江岸区	江岸区疾病预防控制中心			2013-06-14 11	继发	病原学阴性		张伟	2013-06-14	新患者	初治		2013-06-14							治疗	湖北省武汉市江岸区	江岸区花桥街第一社区卫生服务中心		完成疗程
		839	普通病案	湖北省武汉市硚口区	武汉市结核病防治所	湖北省武汉市硚口区	武汉市结核病防治所	420104019-2013-00262	839	18	男性	汉族	学生	本县区	420104009		转诊	2013-06-02	2013-06-13	11	阴性	2013-06-14	湖北省武汉市硚口区	武汉市结核病防治所	湖北省武汉市硚口区	武汉市结核病防治所			2013-06-14 10	继发	病原学阴性		罗艺	2013-06-14	新患者	初治		2013-06-14							治疗	湖北省武汉市硚口区	武汉市结核病防治所		完成疗程
		840	普通病案	湖北省武汉市洪山区	洪山区疾病预防控制中心	湖北省武汉市洪山区	洪山区疾病预防控制中心	420111016-2013-00326	840	22	男性	汉族	学生	本县区	420111006		转诊	2013-06-06	2013-06-12	6	阴性	2013-06-14	湖北省武汉市洪山区	洪山区疾病预防控制中心	湖北省武汉市洪山区	洪山区疾病预防控制中心			2013-06-14 09	继发	病原学阴性		吴杰	2013-06-14	新患者	初治		2013-06-14							治疗	湖北省武汉市洪山区	洪山区疾病预防控制中心		完成疗程
		841	普通病案	湖北省武汉市洪山区	洪山区疾病预防控制中心	湖北省武汉市洪山区	洪山区疾病预防控制中心	420111016-2013-00324	841	25	男性	汉族	学生	本县区	420111002		转诊	2013-06-11	2013-06-12	1	阴性	2013-06-14	湖北省武汉市洪山区	洪山区疾病预防控制中心	湖北省武汉市洪山区	洪山区疾病预防控制中心			2013-06-14 09	继发	病原学阴性		李仁惠	2013-06-14	新患者	初治		2013-06-14							治疗	湖北省武汉市洪山区	洪山区关山街华中科技大学医院		完成疗程
		842	普通病案	湖北省武汉市洪山区	洪山区疾病预防控制中心	湖北省武汉市洪山区	洪山区疾病预防控制中心	420111016-2013-00323	842	22	女性	汉族	学生	本县区	420111002		转诊	2013-05-11	2013-06-12	32	阴性	2013-06-14	湖北省武汉市洪山区	洪山区疾病预防控制中心	湖北省武汉市洪山区	洪山区疾病预防控制中心			2013-06-14 09	继发	病原学阳性		吴杰	2013-06-14	新患者	初治		2013-06-14							治疗	湖北省武汉市洪山区	洪山区疾病预防控制中心		治愈
		843	普通病案	湖北省武汉市硚口区	武汉市结核病防治所	湖北省武汉市硚口区	武汉市结核病防治所	420104019-2013-00264	843	22	男性	汉族	学生	本县区	420104008		追踪	2013-06-09	2013-06-14	5	阴性	2013-06-15	湖北省武汉市硚口区	武汉市结核病防治所	湖北省武汉市硚口区	武汉市结核病防治所			2013-06-15 08	继发	病原学阳性		李晟	2013-06-15	新患者	初治		2013-06-15							治疗	湖北省武汉市硚口区	武汉市结核病防治所		治愈
		844	普通病案	湖北省武汉市江汉区	武汉市江汉区疾病预防控制中心	湖北省武汉市江汉区	武汉市江汉区疾病预防控制中心	420103013-2013-00196	844	13	女性	汉族	学生	本县区	420103006		转诊	2013-06-02	2013-06-06	4	阴性	2013-06-06	湖北省武汉市江汉区	武汉市江汉区疾病预防控制中心	湖北省武汉市江汉区	武汉市江汉区疾病预防控制中心			2013-06-17 14	继发	病原学阳性		李铭	2013-06-17	新患者	初治		2013-06-17							治疗	湖北省武汉市江汉区	江汉区民意街社区卫生服务中心		治愈
		845	普通病案	湖北省武汉市洪山区	洪山区疾病预防控制中心	湖北省武汉市洪山区	洪山区疾病预防控制中心	420111016-2013-00327	845	22	男性	汉族	学生	本县区	420111002		转诊	2013-03-14	2013-06-14	92	阴性	2013-06-17	湖北省武汉市洪山区	洪山区疾病预防控制中心	湖北省武汉市洪山区	洪山区疾病预防控制中心			2013-06-17 09	继发	病原学阴性		李仁惠	2013-06-17	新患者	初治		2013-06-17							治疗	湖北省武汉市洪山区	洪山区疾病预防控制中心		完成疗程
		846	普通病案	湖北省武汉市洪山区	洪山区疾病预防控制中心	湖北省武汉市洪山区	洪山区疾病预防控制中心	420111016-2013-00329	846	20	男性	汉族	学生	本县区	420111002		转诊	2013-05-14	2013-06-14	31	阴性	2013-06-17	湖北省武汉市洪山区	洪山区疾病预防控制中心	湖北省武汉市洪山区	洪山区疾病预防控制中心			2013-06-17 09	继发	病原学阴性		吴杰	2013-06-17	新患者	初治		2013-06-17							治疗	湖北省武汉市洪山区	洪山区疾病预防控制中心		完成疗程
		847	普通病案	湖北省武汉市武昌区	武昌区疾病预防控制中心	湖北省武汉市武昌区	武昌区疾病预防控制中心	420106010-2013-00326	847	21	女性	汉族	学生	本市其它县区	420106002		追踪	2013-04-09	2013-04-15	6	阴性	2013-06-18	湖北省武汉市武昌区	武昌区疾病预防控制中心	湖北省武汉市武昌区	武昌区疾病预防控制中心			2013-06-18 08	继发	病原学阴性		刘文	2013-06-18	新患者	初治		2013-06-18							治疗				完成疗程
		848	普通病案	湖北省武汉市青山区	青山区结核病防治所	湖北省武汉市青山区	青山区结核病防治所	420107018-2013-00116	848	18	男性	汉族	学生	本市其它县区	420107002		追踪	2012-10-12	2013-05-23	223	阴性	2013-06-12	湖北省武汉市青山区	青山区结核病防治所	湖北省武汉市青山区	青山区结核病防治所			2013-06-19 14	继发	病原学阳性		郑和平	2013-06-19	新患者	初治		2013-06-19							治疗	湖北省武汉市青山区	青山区结核病防治所		治愈
		849	普通病案	湖北省武汉市洪山区	洪山区疾病预防控制中心	湖北省武汉市洪山区	洪山区疾病预防控制中心	420111016-2013-00333	849	22	女性	汉族	学生	本县区	420111002		转诊	2013-06-09	2013-06-17	8	阴性	2013-06-20	湖北省武汉市洪山区	洪山区疾病预防控制中心	湖北省武汉市洪山区	洪山区疾病预防控制中心			2013-06-20 09	继发	病原学阳性		吴杰	2013-06-20	新患者	初治		2013-06-20							治疗	湖北省武汉市洪山区	洪山区关山街华中科技大学医院		治愈
		850	普通病案	湖北省武汉市洪山区	洪山区疾病预防控制中心	湖北省武汉市洪山区	洪山区疾病预防控制中心	420111016-2013-00332	850	20	男性	汉族	学生	本县区	420111002		转诊	2013-06-07	2013-06-17	10	阴性	2013-06-20	湖北省武汉市洪山区	洪山区疾病预防控制中心	湖北省武汉市洪山区	洪山区疾病预防控制中心			2013-06-20 09	继发	病原学阴性		李仁惠	2013-06-20	新患者	初治		2013-06-20							治疗	湖北省武汉市洪山区	洪山区疾病预防控制中心		完成疗程
		851	普通病案	湖北省武汉市洪山区	洪山区疾病预防控制中心	湖北省武汉市洪山区	洪山区疾病预防控制中心	420111016-2013-00336	851	22	男性	汉族	学生	本县区	420111002		转诊	2013-03-30	2013-06-17	79	阴性	2013-06-20	湖北省武汉市洪山区	洪山区疾病预防控制中心	湖北省武汉市洪山区	洪山区疾病预防控制中心			2013-06-20 09	继发	病原学阳性		吴杰	2013-06-20	新患者	初治		2013-06-20							治疗	湖北省武汉市洪山区	中国地质大学医院		治愈
		852	普通病案	湖北省武汉市洪山区	洪山区疾病预防控制中心	湖北省武汉市洪山区	洪山区疾病预防控制中心	420111016-2013-00335	852	21	男性	汉族	学生	本县区	420111006		转诊	2013-05-23	2013-06-18	26	阴性	2013-06-20	湖北省武汉市洪山区	洪山区疾病预防控制中心	湖北省武汉市洪山区	洪山区疾病预防控制中心			2013-06-20 09	继发	病原学阴性		李仁惠	2013-06-20	新患者	初治		2013-06-20							治疗	湖北省武汉市洪山区	洪山区疾病预防控制中心		完成疗程
		853	普通病案	湖北省武汉市洪山区	洪山区疾病预防控制中心	湖北省武汉市洪山区	洪山区疾病预防控制中心	420111016-2013-00337	853	23	男性	汉族	学生	本县区	420111002		转诊	2013-06-03	2013-06-19	16	阴性	2013-06-20	湖北省武汉市洪山区	洪山区疾病预防控制中心	湖北省武汉市洪山区	洪山区疾病预防控制中心			2013-06-20 09	继发	病原学阴性		李仁惠	2013-06-20	新患者	初治		2013-06-20							治疗	湖北省武汉市洪山区	洪山区疾病预防控制中心		完成疗程
		854	普通病案	湖北省武汉市青山区	青山区结核病防治所	湖北省武汉市青山区	青山区结核病防治所	420107018-2013-50028	854	20	男性	汉族	学生	本县区	420107002		转诊	2013-06-06	2013-06-07	1	阴性	2013-06-08	湖北省武汉市青山区	青山区结核病防治所	湖北省武汉市青山区	青山区结核病防治所			2013-06-21 09	继发	病原学阴性		朱谦	2013-06-21	新患者	初治		2013-06-21							治疗	湖北省武汉市青山区	青山区结核病防治所		完成疗程
		855	普通病案	湖北省武汉市硚口区	武汉市结核病防治所	湖北省武汉市硚口区	武汉市结核病防治所	420104019-2013-00271	855	21	男性	汉族	学生	本县区	420104012		追踪	2013-05-21	2013-06-20	30	阴性	2013-06-21	湖北省武汉市硚口区	武汉市结核病防治所	湖北省武汉市硚口区	武汉市结核病防治所			2013-06-21 08	继发	病原学阴性		朱国祥	2013-06-21	新患者	初治		2013-06-21							治疗	湖北省武汉市硚口区	武汉市结核病防治所		完成疗程
		856	普通病案	湖北省武汉市东西湖区	东西湖区结核病防治所	湖北省武汉市东西湖区	东西湖区结核病防治所	420112019-2013-00113	856	21	男性	汉族	学生	本县区	420112007		转诊	2013-02-16	2013-06-13	117			湖北省武汉市东西湖区	东西湖区结核病防治所	湖北省武汉市东西湖区	东西湖区结核病防治所			2013-06-21 17	继发	病原学阳性		孟刚	2013-06-21	新患者	初治		2013-06-21							治疗	湖北省武汉市东西湖区	东西湖区径何街卫生院		治愈
		857	普通病案	湖北省武汉市蔡甸区	武汉市蔡甸区疾病预防控制中心	湖北省武汉市蔡甸区	武汉市蔡甸区疾病预防控制中心	420114003-2013-00212	857	12	女性	汉族	学生	本市其它县区	420114003		转诊	2013-06-12	2013-06-24	12	阴性	2013-06-24	湖北省武汉市蔡甸区	武汉市蔡甸区疾病预防控制中心	湖北省武汉市蔡甸区	武汉市蔡甸区疾病预防控制中心			2013-06-24 15	继发	病原学阳性		刘晓燕	2013-06-24	新患者	初治		2013-06-24							治疗	湖北省武汉市蔡甸区	武汉市蔡甸区永安街卫生院		治愈
		858	普通病案	湖北省武汉市洪山区	洪山区疾病预防控制中心	湖北省武汉市洪山区	洪山区疾病预防控制中心	420111016-2013-00345	858	20	女性	汉族	学生	本县区	420111006		转诊	2013-06-17	2013-06-20	3	阴性	2013-06-24	湖北省武汉市洪山区	洪山区疾病预防控制中心	湖北省武汉市洪山区	洪山区疾病预防控制中心			2013-06-24 10	继发	病原学阴性		李仁惠	2013-06-24	新患者	初治		2013-06-24							治疗	湖北省武汉市洪山区	洪山区疾病预防控制中心		完成疗程
		859	普通病案	湖北省武汉市洪山区	洪山区疾病预防控制中心	湖北省武汉市洪山区	洪山区疾病预防控制中心	420111016-2013-00347	859	20	男性	汉族	学生	本县区	420111002		转诊	2013-06-07	2013-06-22	15	阴性	2013-06-24	湖北省武汉市洪山区	洪山区疾病预防控制中心	湖北省武汉市洪山区	洪山区疾病预防控制中心			2013-06-24 09	继发	病原学阴性		李仁惠	2013-06-24	新患者	初治		2013-06-24							治疗	湖北省武汉市洪山区	洪山区关山街华中科技大学医院		完成疗程
		860	普通病案	湖北省武汉市洪山区	洪山区疾病预防控制中心	湖北省武汉市洪山区	洪山区疾病预防控制中心	420111016-2013-00341	860	19	女性	汉族	学生	本县区	420111003		转诊	2013-06-17	2013-06-19	2	阴性	2013-06-24	湖北省武汉市洪山区	洪山区疾病预防控制中心	湖北省武汉市洪山区	洪山区疾病预防控制中心			2013-06-24 09	继发	病原学阳性		吴杰	2013-06-24	新患者	初治		2013-06-24							治疗	湖北省武汉市洪山区	湖北工业大学医院		治愈
		861	普通病案	湖北省武汉市东湖高新技术开发区	武汉东湖新技术开发区九峰街社区卫生服务中心	湖北省武汉市东湖高新技术开发区	武汉东湖新技术开发区九峰街社区卫生服务中心	420192005-2013-01030	861	16	男性	汉族	学生	本市其它县区	420192005		追踪	2013-05-10	2013-05-10	0	阴性	2013-05-10	湖北省武汉市东湖高新技术开发区	武汉东湖新技术开发区九峰街社区卫生服务中心	湖北省武汉市东湖高新技术开发区	武汉东湖新技术开发区九峰街社区卫生服务中心			2013-06-25 08	继发	病原学阴性		龚聪	2013-06-25	新患者	初治		2013-06-25							治疗				完成疗程
		862	普通病案	湖北省武汉市洪山区	洪山区疾病预防控制中心	湖北省武汉市洪山区	洪山区疾病预防控制中心	420111016-2013-00348	862	19	男性	汉族	学生	本县区	420111002		转诊	2013-06-11	2013-06-24	13	阴性	2013-06-25	湖北省武汉市洪山区	洪山区疾病预防控制中心	湖北省武汉市洪山区	洪山区疾病预防控制中心			2013-06-25 08	继发	病原学阴性		吴杰	2013-06-25	新患者	初治		2013-06-25							治疗	湖北省武汉市洪山区	洪山区疾病预防控制中心		完成疗程
		863	普通病案	湖北省武汉市青山区	青山区结核病防治所	湖北省武汉市青山区	青山区结核病防治所	420107018-2013-00124	863	19	男性	汉族	学生	本县区	420107006		直接就诊	2013-06-04	2013-06-27	23			湖北省武汉市青山区	青山区结核病防治所	湖北省武汉市青山区	青山区结核病防治所			2013-07-03 10	继发	病原学阴性		郑和平	2013-07-03	新患者	初治		2013-07-03							治疗	湖北省武汉市青山区	武汉市石化医院		完成疗程
		864	普通病案	湖北省武汉市洪山区	洪山区疾病预防控制中心	湖北省武汉市洪山区	洪山区疾病预防控制中心	420111016-2013-00353	864	23	男性	汉族	学生	本县区	420111002		转诊	2013-05-29	2013-06-03	5	阴性	2013-07-03	湖北省武汉市洪山区	洪山区疾病预防控制中心	湖北省武汉市洪山区	洪山区疾病预防控制中心			2013-07-03 08	继发	病原学阴性		李仁惠	2013-07-03	新患者	初治		2013-07-03							治疗	湖北省武汉市洪山区	洪山区疾病预防控制中心		完成疗程
		865	普通病案	湖北省武汉市洪山区	洪山区疾病预防控制中心	湖北省武汉市洪山区	洪山区疾病预防控制中心	420111016-2013-00352	865	24	男性	汉族	学生	本县区	420111001		转诊	2013-05-15	2013-05-29	14	阴性	2013-07-03	湖北省武汉市洪山区	洪山区疾病预防控制中心	湖北省武汉市洪山区	洪山区疾病预防控制中心			2013-07-03 08	继发	病原学阴性		吴杰	2013-07-03	新患者	初治		2013-07-03							治疗	湖北省武汉市洪山区	洪山区珞南街华中师范大学医院		完成疗程
		866	普通病案	湖北省武汉市洪山区	洪山区疾病预防控制中心	湖北省武汉市洪山区	洪山区疾病预防控制中心	420111016-2013-00355	866	20	男性	汉族	学生	本县区	420111006		转诊	2013-06-26	2013-06-27	1	阴性	2013-07-03	湖北省武汉市洪山区	洪山区疾病预防控制中心	湖北省武汉市洪山区	洪山区疾病预防控制中心			2013-07-03 08	继发	病原学阴性		吴杰	2013-07-03	新患者	初治		2013-07-03							治疗	湖北省武汉市洪山区	洪山区疾病预防控制中心		完成疗程
		867	普通病案	湖北省武汉市洪山区	洪山区疾病预防控制中心	湖北省武汉市洪山区	洪山区疾病预防控制中心	420111016-2013-00358	867	16	男性	汉族	学生	本县区	420111011		转诊	2013-06-03	2013-06-30	27	阴性	2013-07-03	湖北省武汉市洪山区	洪山区疾病预防控制中心	湖北省武汉市洪山区	洪山区疾病预防控制中心			2013-07-03 14	继发	病原学阳性		吴杰	2013-07-03	新患者	初治		2013-07-03							治疗	湖北省武汉市洪山区	武汉市洪山区张家湾街社区卫生中心		治愈
		868	普通病案	湖北省武汉市洪山区	洪山区疾病预防控制中心	湖北省武汉市洪山区	洪山区疾病预防控制中心	420111016-2013-00354	868	17	女性	汉族	学生	本县区	420111007		转诊	2013-05-30	2013-06-25	26	阴性	2013-07-03	湖北省武汉市洪山区	洪山区疾病预防控制中心	湖北省武汉市洪山区	洪山区疾病预防控制中心			2013-07-03 09	继发	病原学阴性		李仁惠	2013-07-03	新患者	初治		2013-07-03							治疗	湖北省武汉市洪山区	洪山区洪山街社区卫生服务中心		完成疗程
		869	普通病案	湖北省武汉市洪山区	洪山区疾病预防控制中心	湖北省武汉市洪山区	洪山区疾病预防控制中心	420111016-2013-00357	869	22	男性	汉族	学生	本县区	420111001		转诊	2013-06-18	2013-06-28	10	阴性	2013-07-03	湖北省武汉市洪山区	洪山区疾病预防控制中心	湖北省武汉市洪山区	洪山区疾病预防控制中心			2013-07-03 14	继发	病原学阳性		李仁惠	2013-07-03	新患者	初治		2013-07-03							治疗	湖北省武汉市洪山区	洪山区珞南街理工大社区卫生服务中心		治愈
		870	普通病案	湖北省武汉市洪山区	洪山区疾病预防控制中心	湖北省武汉市洪山区	洪山区疾病预防控制中心	420111016-2013-00356	870	23	男性	汉族	学生	本县区	420111002		转诊	2013-06-22	2013-06-27	5	阴性	2013-07-03	湖北省武汉市洪山区	洪山区疾病预防控制中心	湖北省武汉市洪山区	洪山区疾病预防控制中心			2013-07-03 09	继发	病原学阴性		李仁惠	2013-07-03	新患者	初治		2013-07-03							治疗	湖北省武汉市洪山区	中国地质大学医院		完成疗程
		871	普通病案	湖北省武汉市武昌区	武昌区疾病预防控制中心	湖北省武汉市武昌区	武昌区疾病预防控制中心	420106010-2013-00355	871	17	男性	汉族	学生	本市其它县区	420106003		追踪	2013-01-12	2013-06-15	154	阴性	2013-07-05	湖北省武汉市武昌区	武昌区疾病预防控制中心	湖北省武汉市武昌区	武昌区疾病预防控制中心			2013-07-05 09	继发	病原学阴性		刘文	2013-07-05	新患者	初治		2013-07-05							治疗				完成疗程
		872	普通病案	湖北省武汉市武昌区	武昌区疾病预防控制中心	湖北省武汉市武昌区	武昌区疾病预防控制中心	420106010-2013-00363	872	20	女性	汉族	学生	本县区	420106013		转诊	2013-07-01	2013-07-05	4	阴性	2013-07-08	湖北省武汉市武昌区	武昌区疾病预防控制中心	湖北省武汉市武昌区	武昌区疾病预防控制中心			2013-07-16 10	继发	病原学阳性		刘文	2013-07-08	新患者	初治		2013-07-08							治疗				治愈
		873	普通病案	湖北省武汉市硚口区	武汉市结核病防治所	湖北省武汉市硚口区	武汉市结核病防治所	420104019-2013-00296	873	15	女性	汉族	学生	本县区	420104004		转诊	2013-06-10	2013-07-07	27	阴性	2013-07-08	湖北省武汉市硚口区	武汉市结核病防治所	湖北省武汉市硚口区	武汉市结核病防治所			2013-07-08 09	继发	病原学阴性		李全	2013-07-08	新患者	初治		2013-07-08							治疗	湖北省武汉市硚口区	武汉市结核病防治所		完成疗程
		874	普通病案	湖北省武汉市硚口区	武汉市结核病防治所	湖北省武汉市硚口区	武汉市结核病防治所	420104019-2013-00288	874	16	男性	汉族	学生	本县区	420104003		追踪	2013-06-13	2013-07-07	24	阴性	2013-07-08	湖北省武汉市硚口区	武汉市结核病防治所	湖北省武汉市硚口区	武汉市结核病防治所			2013-07-08 09	继发	病原学阴性		曾洁	2013-07-08	新患者	初治		2013-07-08							治疗	湖北省武汉市硚口区	武汉市结核病防治所		完成疗程
		875	普通病案	湖北省武汉市洪山区	洪山区疾病预防控制中心	湖北省武汉市洪山区	洪山区疾病预防控制中心	420111016-2013-00365	875	18	男性	汉族	学生	本县区	420111003		转诊	2013-06-06	2013-07-06	30	阴性	2013-07-08	湖北省武汉市洪山区	洪山区疾病预防控制中心	湖北省武汉市洪山区	洪山区疾病预防控制中心			2013-07-08 08	继发	病原学阴性		吴杰	2013-07-08	新患者	初治		2013-07-08							治疗	湖北省武汉市洪山区	湖北工业大学医院		完成疗程
		876	普通病案	湖北省武汉市洪山区	洪山区疾病预防控制中心	湖北省武汉市洪山区	洪山区疾病预防控制中心	420111016-2013-00364	876	18	男性	汉族	学生	本县区	420111004		转诊	2013-07-02	2013-07-05	3	阴性	2013-07-08	湖北省武汉市洪山区	洪山区疾病预防控制中心	湖北省武汉市洪山区	洪山区疾病预防控制中心			2013-07-08 09	继发	病原学阴性		李仁惠	2013-07-08	新患者	初治		2013-07-08							治疗	湖北省武汉市洪山区	武汉市洪山区张家湾街社区卫生中心		完成疗程
		877	普通病案	湖北省武汉市新洲区	新洲区疾病预防控制中心	湖北省武汉市新洲区	新洲区疾病预防控制中心	420117002-2013-00308	877	16	男性	汉族	学生	本县区	420117002		追踪	2013-01-09	2013-07-09	181			湖北省武汉市新洲区	新洲区疾病预防控制中心	湖北省武汉市新洲区	新洲区疾病预防控制中心			2013-07-09 09	继发	病原学阴性		杨丹	2013-07-09	新患者	初治		2013-07-09							治疗	湖北省武汉市新洲区	新洲区阳逻街卫生院		完成疗程
		878	普通病案	湖北省武汉市青山区	青山区结核病防治所	湖北省武汉市青山区	青山区结核病防治所	420107018-2013-00134	878	23	女性	汉族	学生	本市其它县区	420107005		转诊	2013-06-14	2013-06-19	5	阴性	2013-07-03	湖北省武汉市青山区	青山区结核病防治所	湖北省武汉市青山区	青山区结核病防治所			2013-07-09 09	继发	病原学阴性		郑和平	2013-07-09	新患者	初治		2013-07-09							治疗	湖北省武汉市青山区	青山区厂前街社区卫生服务中心		完成疗程
		879	普通病案	湖北省武汉市硚口区	武汉市结核病防治所	湖北省武汉市硚口区	武汉市结核病防治所	420104019-2013-00300	879	18	男性	汉族	学生	本县区	420104003		转诊	2013-06-30	2013-07-08	8	阴性	2013-07-09	湖北省武汉市硚口区	武汉市结核病防治所	湖北省武汉市硚口区	武汉市结核病防治所			2013-07-09 09	继发	病原学阴性		罗艺	2013-07-09	新患者	初治		2013-07-09							治疗	湖北省武汉市硚口区	武汉市结核病防治所		完成疗程
		880	普通病案	湖北省武汉市江夏区	武汉市江夏区疾病预防控制中心	湖北省武汉市江夏区	武汉市江夏区疾病预防控制中心	420115008-2013-00272	880	22	男性	汉族	学生	本县区	420115405		转诊	2013-06-19	2013-07-09	20	阴性	2013-07-09	湖北省武汉市江夏区	武汉市江夏区疾病预防控制中心	湖北省武汉市江夏区	武汉市江夏区疾病预防控制中心			2013-07-10 15	继发	病原学阳性		田晓春	2013-07-10	新患者	初治	2013-09-10	2013-07-10							治疗	湖北省武汉市江夏区	武汉市江夏区经济开发区大桥新区卫生院		治愈
		881	普通病案	湖北省武汉市江夏区	武汉市江夏区疾病预防控制中心	湖北省武汉市江夏区	武汉市江夏区疾病预防控制中心	420115008-2013-00271	881	20	男性	汉族	学生	本县区	420115010		转诊	2013-06-20	2013-06-25	5	阴性	2013-07-09	湖北省武汉市江夏区	武汉市江夏区疾病预防控制中心	湖北省武汉市江夏区	武汉市江夏区疾病预防控制中心			2013-07-10 14	继发	病原学阴性		田晓春	2013-07-10	新患者	初治	2013-09-10	2013-07-10							治疗	湖北省武汉市江夏区	藏龙岛经院社区卫生服务中心		完成疗程
		882	普通病案	湖北省武汉市东西湖区	东西湖区结核病防治所	湖北省武汉市东西湖区	东西湖区结核病防治所	420112019-2013-00126	882	23	男性	汉族	学生	本县区	420112400		追踪	2013-06-03	2013-06-29	26			湖北省武汉市东西湖区	东西湖区结核病防治所	湖北省武汉市东西湖区	东西湖区结核病防治所			2013-07-10 08	继发	病原学阴性		孟刚	2013-07-10	新患者	初治		2013-07-10							治疗	湖北省武汉市东西湖区	常青花园社区卫生服务中心		完成疗程
		883	普通病案	湖北省武汉市东西湖区	东西湖区结核病防治所	湖北省武汉市东西湖区	东西湖区结核病防治所	420112019-2013-00125	883	19	男性	汉族	学生	本县区	420112400		追踪	2013-06-07	2013-06-19	12	阴性	2013-07-10	湖北省武汉市东西湖区	东西湖区结核病防治所	湖北省武汉市东西湖区	东西湖区结核病防治所			2013-07-10 09	继发	病原学阴性		孟刚	2013-07-10	新患者	初治		2013-07-10							治疗	湖北省武汉市东西湖区	常青花园社区卫生服务中心		诊断变更
		884	普通病案	湖北省武汉市汉阳区	武汉市汉阳区结核病防治所	湖北省武汉市汉阳区	武汉市汉阳区结核病防治所	420105012-2013-00201	884	22	女性	汉族	学生	本县区	420105007		转诊	2013-06-11	2013-06-16	5	阴性	2013-06-26	湖北省武汉市汉阳区	武汉市汉阳区结核病防治所	湖北省武汉市汉阳区	武汉市汉阳区结核病防治所			2013-07-11 09	继发	病原学阴性		朱建	2013-07-11	新患者	初治	2013-08-26	2013-07-11							治疗	湖北省武汉市汉阳区	汉阳区五里街社区卫生服务中心		完成疗程
		885	普通病案	湖北省武汉市洪山区	洪山区疾病预防控制中心	湖北省武汉市洪山区	洪山区疾病预防控制中心	420111016-2013-00372	885	23	男性	汉族	学生	本县区	420111011		转诊	2013-06-09	2013-07-09	30	阴性	2013-07-11	湖北省武汉市洪山区	洪山区疾病预防控制中心	湖北省武汉市洪山区	洪山区疾病预防控制中心			2013-07-11 09	继发	病原学阴性		李仁惠	2013-07-11	新患者	初治		2013-07-11							治疗	湖北省武汉市洪山区	武汉市洪山区张家湾街社区卫生中心		完成疗程
		886	普通病案	湖北省武汉市洪山区	洪山区疾病预防控制中心	湖北省武汉市洪山区	洪山区疾病预防控制中心	420111016-2013-00367	886	22	男性	汉族	学生	本县区	420111006		转诊	2013-06-01	2013-06-09	8	阴性	2013-07-11	湖北省武汉市洪山区	洪山区疾病预防控制中心	湖北省武汉市洪山区	洪山区疾病预防控制中心			2013-07-11 08	继发	病原学阴性		李仁惠	2013-07-11	新患者	初治		2013-07-11							治疗	湖北省武汉市洪山区	洪山区疾病预防控制中心		完成疗程
		887	普通病案	湖北省武汉市洪山区	洪山区疾病预防控制中心	湖北省武汉市洪山区	洪山区疾病预防控制中心	420111016-2013-00371	887	22	男性	汉族	学生	本县区	420111006		转诊	2013-07-05	2013-07-09	4	阴性	2013-07-11	湖北省武汉市洪山区	洪山区疾病预防控制中心	湖北省武汉市洪山区	洪山区疾病预防控制中心			2013-07-11 08	继发	病原学阴性		李仁惠	2013-07-11	新患者	初治		2013-07-11							治疗	湖北省武汉市洪山区	洪山区疾病预防控制中心		完成疗程
		888	普通病案	湖北省武汉市武昌区	武昌区疾病预防控制中心	湖北省武汉市武昌区	武昌区疾病预防控制中心	420106010-2013-00373	888	19	男性	汉族	学生	本市其它县区	420106003		追踪	2013-04-04	2013-04-26	22	阴性	2013-07-12	湖北省武汉市武昌区	武昌区疾病预防控制中心	湖北省武汉市武昌区	武昌区疾病预防控制中心			2013-07-12 13	继发	病原学阴性		刘文	2013-07-12	新患者	初治		2013-07-12							治疗				完成疗程
		889	普通病案	湖北省武汉市东湖高新技术开发区	武汉东湖新技术开发区九峰街社区卫生服务中心	湖北省武汉市东湖高新技术开发区	武汉东湖新技术开发区九峰街社区卫生服务中心	420192005-2013-01035	889	18	男性	汉族	学生	本市其它县区	420192006		转诊	2013-06-13	2013-07-13	30	未提供		湖北省武汉市东湖高新技术开发区	武汉东湖新技术开发区九峰街社区卫生服务中心	湖北省武汉市东湖高新技术开发区	武汉东湖新技术开发区九峰街社区卫生服务中心			2013-07-15 08	继发	病原学阴性		李丹凤	2013-07-15	新患者	初治		2013-07-15							治疗				完成疗程
		890	普通病案	湖北省武汉市硚口区	武汉市结核病防治所	湖北省武汉市硚口区	武汉市结核病防治所	420104019-2013-00312	890	16	女性	汉族	学生	本县区	420104003		转诊	2013-07-09	2013-07-14	5	阴性	2013-07-15	湖北省武汉市硚口区	武汉市结核病防治所	湖北省武汉市硚口区	武汉市结核病防治所			2013-07-15 09	继发	病原学阴性		连展	2013-07-15	新患者	初治		2013-07-15							治疗	湖北省武汉市硚口区	武汉市结核病防治所		完成疗程
		891	普通病案	湖北省武汉市硚口区	武汉市结核病防治所	湖北省武汉市硚口区	武汉市结核病防治所	420104019-2013-00313	891	15	男性	汉族	学生	本县区	420104011		转诊	2013-07-09	2013-07-14	5	阴性	2013-07-15	湖北省武汉市硚口区	武汉市结核病防治所	湖北省武汉市硚口区	武汉市结核病防治所			2013-07-15 10	继发	病原学阴性		姚芳	2013-07-15	新患者	初治		2013-07-15							治疗	湖北省武汉市硚口区	武汉市结核病防治所		完成疗程
		892	普通病案	湖北省武汉市硚口区	武汉市结核病防治所	湖北省武汉市硚口区	武汉市结核病防治所	420104019-2013-00316	892	16	男性	汉族	学生	本县区	420104012		转诊	2013-07-04	2013-07-15	11	阴性	2013-07-16	湖北省武汉市硚口区	武汉市结核病防治所	湖北省武汉市硚口区	武汉市结核病防治所			2013-07-16 08	继发	病原学阴性		张伟	2013-07-16	新患者	初治		2013-07-16							治疗	湖北省武汉市硚口区	武汉市结核病防治所		完成疗程
		893	普通病案	湖北省武汉市洪山区	洪山区疾病预防控制中心	湖北省武汉市洪山区	洪山区疾病预防控制中心	420111016-2013-00379	893	20	男性	汉族	学生	本县区	420111002		转诊	2013-06-22	2013-07-12	20	阴性	2013-07-16	湖北省武汉市洪山区	洪山区疾病预防控制中心	湖北省武汉市洪山区	洪山区疾病预防控制中心			2013-07-16 08	继发	病原学阴性		李仁惠	2013-07-16	新患者	初治		2013-07-16							治疗	湖北省武汉市洪山区	武汉市第三医院光谷院区		完成疗程
		894	普通病案	湖北省武汉市武昌区	武昌区疾病预防控制中心	湖北省武汉市武昌区	武昌区疾病预防控制中心	420106010-2013-00386	894	22	男性	汉族	学生	本县区	420106013		转诊	2013-06-13	2013-07-13	30	阴性	2013-07-19	湖北省武汉市武昌区	武昌区疾病预防控制中心	湖北省武汉市武昌区	武昌区疾病预防控制中心			2013-07-19 09	继发	病原学阳性		刘文	2013-07-19	新患者	初治		2013-07-19							治疗				治愈
		895	普通病案	湖北省武汉市洪山区	洪山区疾病预防控制中心	湖北省武汉市洪山区	洪山区疾病预防控制中心	420111016-2013-00388	895	21	男性	汉族	学生	本县区	420111002		转诊	2013-06-28	2013-07-18	20	阴性	2013-07-19	湖北省武汉市洪山区	洪山区疾病预防控制中心	湖北省武汉市洪山区	洪山区疾病预防控制中心			2013-07-19 10	继发	病原学阴性		吴杰	2013-07-19	新患者	初治		2013-07-19							治疗	湖北省武汉市洪山区	武汉市第三医院光谷院区		完成疗程
		896	普通病案	湖北省武汉市黄陂区	武汉市黄陂区疾病预防控制中心	湖北省武汉市黄陂区	武汉市黄陂区疾病预防控制中心	420116003-2013-00363	896	17	女性	汉族	学生	本市其它县区	420116001		追踪	2013-06-17	2013-07-22	35			湖北省武汉市黄陂区	武汉市黄陂区疾病预防控制中心	湖北省武汉市黄陂区	武汉市黄陂区疾病预防控制中心			2013-07-22 10	继发	病原学阴性		汪亮	2013-07-22	新患者	初治		2013-07-22							治疗	湖北省武汉市黄陂区	武汉市黄陂区前川街道卫生院		完成疗程
		897	普通病案	湖北省武汉市黄陂区	武汉市黄陂区疾病预防控制中心	湖北省武汉市黄陂区	武汉市黄陂区疾病预防控制中心	420116003-2013-00365	897	19	女性	汉族	学生	本市其它县区	420116013		追踪	2013-04-09	2013-07-22	104			湖北省武汉市黄陂区	武汉市黄陂区疾病预防控制中心	湖北省武汉市黄陂区	武汉市黄陂区疾病预防控制中心			2013-07-22 10	继发	病原学阳性		汪亮	2013-07-22	新患者	初治		2013-07-22							治疗	湖北省武汉市黄陂区	武汉市黄陂区蔡家榨街道卫生院		治愈
		898	普通病案	湖北省武汉市洪山区	洪山区疾病预防控制中心	湖北省武汉市洪山区	洪山区疾病预防控制中心	420111016-2013-00392	898	22	男性	汉族	学生	本县区	420111002		转诊	2013-06-18	2013-07-18	30	阴性	2013-07-22	湖北省武汉市洪山区	洪山区疾病预防控制中心	湖北省武汉市洪山区	洪山区疾病预防控制中心			2013-07-22 09	继发	病原学阴性		李仁惠	2013-07-22	新患者	初治		2013-07-22							治疗	湖北省武汉市洪山区	洪山区疾病预防控制中心		完成疗程
		899	普通病案	湖北省武汉市武昌区	武昌区疾病预防控制中心	湖北省武汉市武昌区	武昌区疾病预防控制中心	420106010-2013-00404	899	23	女性	汉族	学生	本市其它县区	420106005		追踪	2013-04-25	2013-04-28	3	阴性	2013-07-23	湖北省武汉市武昌区	武昌区疾病预防控制中心	湖北省武汉市武昌区	武昌区疾病预防控制中心			2013-07-23 10	继发	病原学阴性		刘文	2013-07-23	新患者	初治		2013-07-23							治疗				完成疗程
		900	普通病案	湖北省武汉市青山区	青山区结核病防治所	湖北省武汉市青山区	青山区结核病防治所	420107018-2013-00146	900	17	男性	汉族	学生	本市其它县区	420107001		追踪	2013-05-25	2013-06-09	15	阴性	2013-07-02	湖北省武汉市青山区	青山区结核病防治所	湖北省武汉市青山区	青山区结核病防治所			2013-07-23 09	继发	病原学阴性		郑和平	2013-07-23	新患者	初治		2013-07-23							治疗	湖北省武汉市青山区	青山区结核病防治所		完成疗程
		901	普通病案	湖北省武汉市洪山区	洪山区疾病预防控制中心	湖北省武汉市洪山区	洪山区疾病预防控制中心	420111016-2013-00401	901	22	男性	汉族	学生	本县区	420111002		转诊	2013-07-21	2013-07-22	1	阴性	2013-07-25	湖北省武汉市洪山区	洪山区疾病预防控制中心	湖北省武汉市洪山区	洪山区疾病预防控制中心			2013-07-25 09	继发	病原学阴性		吴杰	2013-07-25	新患者	初治		2013-07-25							治疗	湖北省武汉市洪山区	洪山区关山街华中科技大学医院		完成疗程
		902	普通病案	湖北省武汉市洪山区	洪山区疾病预防控制中心	湖北省武汉市洪山区	洪山区疾病预防控制中心	420111016-2013-00397	902	21	男性	汉族	学生	本县区	420111002		转诊	2013-07-19	2013-07-22	3	阴性	2013-07-25	湖北省武汉市洪山区	洪山区疾病预防控制中心	湖北省武汉市洪山区	洪山区疾病预防控制中心			2013-07-25 09	继发	病原学阴性		吴杰	2013-07-25	新患者	初治		2013-07-25							治疗	湖北省武汉市洪山区	洪山区关山街华中科技大学医院		完成疗程
		903	普通病案	湖北省武汉市武昌区	武昌区疾病预防控制中心	湖北省武汉市武昌区	武昌区疾病预防控制中心	420106010-2013-00410	903	15	女性	汉族	学生	本县区	420106005		转诊	2013-07-17	2013-07-21	4	阴性	2013-07-26	湖北省武汉市武昌区	武昌区疾病预防控制中心	湖北省武汉市武昌区	武昌区疾病预防控制中心			2013-07-26 10	继发	病原学阴性		刘文	2013-07-26	新患者	初治		2013-07-26							治疗				完成疗程
		904	普通病案	湖北省武汉市汉南区	武汉市汉南区疾病预防控制中心	湖北省武汉市汉南区	武汉市汉南区疾病预防控制中心	420113006-2013-00051	904	19	男性	汉族	学生	本市其它县区	420113001		追踪	2013-06-10	2013-06-13	3	阴性	2013-07-27	湖北省武汉市汉南区	武汉市汉南区疾病预防控制中心	湖北省武汉市汉南区	武汉市汉南区疾病预防控制中心			2013-07-27 15	继发	病原学阴性		秦仁浩	2013-07-27	新患者	初治	2013-08-27	2013-07-27							治疗	湖北省武汉市汉南区	武汉市汉南区人民医院		完成疗程
		905	普通病案	湖北省武汉市江汉区	武汉市江汉区疾病预防控制中心	湖北省武汉市江汉区	武汉市江汉区疾病预防控制中心	420103013-2013-00241	905	19	女性	汉族	学生	本县区	420103012		转诊	2013-07-13	2013-07-17	4	阴性	2013-07-17	湖北省武汉市江汉区	武汉市江汉区疾病预防控制中心	湖北省武汉市江汉区	武汉市江汉区疾病预防控制中心			2013-07-29 08	继发	病原学阴性		连展	2013-07-29	新患者	初治		2013-07-29							治疗	湖北省武汉市江汉区	江汉区常青街社区卫生服务中心		完成疗程
		906	普通病案	湖北省武汉市江汉区	武汉市江汉区疾病预防控制中心	湖北省武汉市江汉区	武汉市江汉区疾病预防控制中心	420103013-2013-00242	906	16	男性	汉族	学生	本县区	420103004		转诊	2013-06-28	2013-07-02	4	阴性	2013-07-02	湖北省武汉市江汉区	武汉市江汉区疾病预防控制中心	湖北省武汉市江汉区	武汉市江汉区疾病预防控制中心			2013-07-29 08	继发	病原学阴性		连展马万里	2013-07-29	新患者	初治		2013-07-29							治疗	湖北省武汉市江汉区	江汉区民权街社区卫生服务中心		完成疗程
		907	普通病案	湖北省武汉市江岸区	江岸区疾病预防控制中心	湖北省武汉市江岸区	江岸区疾病预防控制中心	420102000-2013-00287	907	17	男性	汉族	学生	本市其它县区	420102009		转诊	2013-06-28	2013-07-13	15	未提供		湖北省武汉市江岸区	江岸区疾病预防控制中心	湖北省武汉市江岸区	江岸区疾病预防控制中心			2013-07-30 10	继发	病原学阳性		陈国玺	2013-07-30	新患者	初治		2013-07-30							治疗	湖北省武汉市江岸区	江岸区劳动街社区卫生服务中心		治愈
		908	普通病案	湖北省武汉市硚口区	武汉市结核病防治所	湖北省武汉市硚口区	武汉市结核病防治所	420104019-2013-00329	908	15	男性	汉族	学生	本县区	420104012		转诊	2013-07-01	2013-07-30	29	阴性	2013-07-31	湖北省武汉市硚口区	武汉市结核病防治所	湖北省武汉市硚口区	武汉市结核病防治所			2013-07-31 09	继发	病原学阴性		刘小玉	2013-07-31	新患者	初治		2013-07-31							治疗	湖北省武汉市硚口区	武汉市结核病防治所		完成疗程
		909	普通病案	湖北省武汉市洪山区	洪山区疾病预防控制中心	湖北省武汉市洪山区	洪山区疾病预防控制中心	420111016-2013-00412	909	15	女性	汉族	学生	本县区	420111002		转诊	2013-05-27	2013-07-30	64			湖北省武汉市洪山区	洪山区疾病预防控制中心	湖北省武汉市洪山区	洪山区疾病预防控制中心			2013-08-02 08	继发	病原学阴性		吴杰	2013-08-02	新患者	初治		2013-08-02							治疗	湖北省武汉市洪山区	洪山区疾病预防控制中心		完成疗程
		910	普通病案	湖北省武汉市黄陂区	武汉市黄陂区疾病预防控制中心	湖北省武汉市黄陂区	武汉市黄陂区疾病预防控制中心	420116003-2013-00390	910	17	女性	汉族	学生	本县区	420116001		转诊	2013-08-01	2013-08-05	4			湖北省武汉市黄陂区	武汉市黄陂区疾病预防控制中心	湖北省武汉市黄陂区	武汉市黄陂区疾病预防控制中心			2013-08-05 08	继发	病原学阴性		汪惠兰	2013-08-05	新患者	初治		2013-08-05							治疗	湖北省武汉市黄陂区	武汉市黄陂区前川街道卫生院		完成疗程
		911	普通病案	湖北省武汉市汉阳区	武汉市汉阳区结核病防治所	湖北省武汉市汉阳区	武汉市汉阳区结核病防治所	420105012-2013-00228	911	12	女性	汉族	学生	本县区	420105008		转诊	2013-05-01	2013-05-10	9	阴性	2013-05-10	湖北省武汉市汉阳区	武汉市汉阳区结核病防治所	湖北省武汉市汉阳区	武汉市汉阳区结核病防治所			2013-08-06 10	继发	病原学阳性		王长武	2013-08-06	新患者	初治	2013-10-10	2013-08-06							治疗	湖北省武汉市汉阳区	汉阳区琴断口街社区卫生服务中心		治愈
		912	普通病案	湖北省武汉市硚口区	武汉市结核病防治所	湖北省武汉市硚口区	武汉市结核病防治所	420104019-2013-00346	912	22	男性	汉族	学生	本县区	420104005		转诊	2013-08-02	2013-08-06	4	阴性	2013-08-07	湖北省武汉市硚口区	武汉市结核病防治所	湖北省武汉市硚口区	武汉市结核病防治所			2013-08-07 09	继发	病原学阳性		孙学智	2013-08-07	新患者	初治		2013-08-07							治疗	湖北省武汉市硚口区	武汉市结核病防治所		治愈
		913	普通病案	湖北省武汉市江夏区	武汉市江夏区疾病预防控制中心	湖北省武汉市江夏区	武汉市江夏区疾病预防控制中心	420115008-2013-00312	913	15	男性	汉族	学生	本县区	420115001		转诊	2013-07-03	2013-07-30	27	阴性	2013-08-09	湖北省武汉市江夏区	武汉市江夏区疾病预防控制中心	湖北省武汉市江夏区	武汉市江夏区疾病预防控制中心			2013-08-09 15	继发	病原学阳性		田晓春	2013-08-09	新患者	初治	2013-10-09	2013-08-09							治疗	湖北省武汉市江夏区	武汉市江夏区纸坊社区卫生服务中心		治愈
		914	普通病案	湖北省武汉市东湖高新技术开发区	武汉东湖新技术开发区佛祖岭社区卫生服务中心	湖北省武汉市东湖高新技术开发区	武汉东湖新技术开发区佛祖岭社区卫生服务中心	420192011-2013-01078	914	22	女性	汉族	学生	本市其它县区	420192002		追踪	2013-07-01	2013-08-12	42	阴性	2013-07-20	湖北省武汉市东湖高新技术开发区	武汉东湖新技术开发区佛祖岭社区卫生服务中心	湖北省武汉市东湖高新技术开发区	武汉东湖新技术开发区佛祖岭社区卫生服务中心			2013-08-12 09	继发	病原学阴性		邱宏	2013-08-12	新患者	初治		2013-08-12							治疗	湖北省武汉市东湖高新技术开发区	武汉东湖新技术开发区佛祖岭社区卫生服务中心		完成疗程
		915	普通病案	湖北省武汉市江夏区	武汉市江夏区疾病预防控制中心	湖北省武汉市江夏区	武汉市江夏区疾病预防控制中心	420115008-2013-00316	915	16	男性	汉族	学生	本县区	420115001		转诊	2013-04-05	2013-08-12	129	阴性	2013-08-12	湖北省武汉市江夏区	武汉市江夏区疾病预防控制中心	湖北省武汉市江夏区	武汉市江夏区疾病预防控制中心			2013-08-12 15	继发	病原学阴性		蒋在慧	2013-08-12	新患者	初治	2013-10-12	2013-08-12							治疗	湖北省武汉市江夏区	武汉市江夏区纸坊社区卫生服务中心		完成疗程
		916	普通病案	湖北省武汉市洪山区	洪山区疾病预防控制中心	湖北省武汉市洪山区	洪山区疾病预防控制中心	420111016-2013-00423	916	20	男性	汉族	学生	本县区	420111001		转诊	2013-05-08	2013-08-08	92	阴性	2013-08-12	湖北省武汉市洪山区	洪山区疾病预防控制中心	湖北省武汉市洪山区	洪山区疾病预防控制中心			2013-08-12 08	继发	病原学阴性		李仁惠	2013-08-12	新患者	初治		2013-08-12							治疗	湖北省武汉市洪山区	洪山区珞南街华中师范大学医院		完成疗程
		917	普通病案	湖北省武汉市洪山区	洪山区疾病预防控制中心	湖北省武汉市洪山区	洪山区疾病预防控制中心	420111016-2013-00422	917	20	男性	汉族	学生	本县区	420111002		转诊	2013-08-01	2013-08-08	7	阴性	2013-08-12	湖北省武汉市洪山区	洪山区疾病预防控制中心	湖北省武汉市洪山区	洪山区疾病预防控制中心			2013-08-12 08	继发	病原学阴性		李仁惠	2013-08-12	新患者	初治		2013-08-12							治疗	湖北省武汉市洪山区	武汉市第三医院光谷院区		完成疗程
		918	普通病案	湖北省武汉市江岸区	江岸区疾病预防控制中心	湖北省武汉市江岸区	江岸区疾病预防控制中心	420102000-2013-00314	918	15	男性	汉族	学生	本市其它县区	420102012		转诊	2013-07-30	2013-08-05	6	阴性	2013-08-05	湖北省武汉市江岸区	江岸区疾病预防控制中心	湖北省武汉市江岸区	江岸区疾病预防控制中心			2013-08-13 14	继发	病原学阴性		金武	2013-08-13	新患者	初治		2013-08-13							治疗	湖北省武汉市江岸区	江岸区丹水池街社区卫生服务中心		完成疗程
		919	普通病案	湖北省武汉市武昌区	武昌区疾病预防控制中心	湖北省武汉市武昌区	武昌区疾病预防控制中心	420106010-2013-00442	919	22	男性	汉族	学生	本市其它县区	420106013		追踪	2013-05-31	2013-06-06	6	阴性	2013-08-16	湖北省武汉市武昌区	武昌区疾病预防控制中心	湖北省武汉市武昌区	武昌区疾病预防控制中心			2013-08-16 14	继发	病原学阴性		刘文	2013-08-16	新患者	初治		2013-08-16							治疗				完成疗程
		920	普通病案	湖北省武汉市汉阳区	武汉市汉阳区结核病防治所	湖北省武汉市汉阳区	武汉市汉阳区结核病防治所	420105012-2013-00238	920	20	女性	汉族	学生	本县区	420105005		转诊	2013-07-16	2013-07-19	3	阴性	2013-08-14	湖北省武汉市汉阳区	武汉市汉阳区结核病防治所	湖北省武汉市汉阳区	武汉市汉阳区结核病防治所			2013-08-19 10	继发	病原学阴性		周震	2013-08-19	新患者	初治	2013-10-14	2013-08-19							治疗	湖北省武汉市汉阳区	汉阳区洲头街社区卫生服务中心		完成疗程
		921	普通病案	湖北省武汉市武昌区	武昌区疾病预防控制中心	湖北省武汉市武昌区	武昌区疾病预防控制中心	420106010-2013-00448	921	19	男性	藏族	学生	本市其它县区	420106008		追踪	2013-04-01	2013-04-07	6	阴性	2013-08-20	湖北省武汉市武昌区	武昌区疾病预防控制中心	湖北省武汉市武昌区	武昌区疾病预防控制中心			2013-08-20 08	继发	病原学阳性		刘文	2013-08-20	新患者	初治		2013-08-20							治疗				治愈
		922	普通病案	湖北省武汉市江汉区	武汉市江汉区疾病预防控制中心	湖北省武汉市江汉区	武汉市江汉区疾病预防控制中心	420103013-2013-00273	922	21	男性	汉族	学生	本县区	420103004		转诊	2013-08-08	2013-08-12	4	阴性	2013-08-12	湖北省武汉市江汉区	武汉市江汉区疾病预防控制中心	湖北省武汉市江汉区	武汉市江汉区疾病预防控制中心			2013-08-20 08	继发	病原学阴性		杜娟	2013-08-20	新患者	初治		2013-08-20							治疗	湖北省武汉市江汉区	江汉区民权街社区卫生服务中心		完成疗程
		923	普通病案	湖北省武汉市洪山区	洪山区疾病预防控制中心	湖北省武汉市洪山区	洪山区疾病预防控制中心	420111016-2013-00430	923	24	男性	汉族	学生	本县区	420111002		转诊	2013-07-13	2013-07-18	5	阴性	2013-08-20	湖北省武汉市洪山区	洪山区疾病预防控制中心	湖北省武汉市洪山区	洪山区疾病预防控制中心			2013-08-20 08	继发	病原学阴性		吴杰	2013-08-20	新患者	初治		2013-08-20							治疗	湖北省武汉市洪山区	洪山区关山街华中科技大学医院		完成疗程
		924	普通病案	湖北省武汉市洪山区	洪山区疾病预防控制中心	湖北省武汉市洪山区	洪山区疾病预防控制中心	420111016-2013-00432	924	21	男性	汉族	学生	本县区	420111002		转诊	2013-07-31	2013-08-16	16	阴性	2013-08-20	湖北省武汉市洪山区	洪山区疾病预防控制中心	湖北省武汉市洪山区	洪山区疾病预防控制中心			2013-08-20 08	继发	病原学阴性		李仁惠	2013-08-20	新患者	初治		2013-08-20							治疗	湖北省武汉市洪山区	中国地质大学医院		完成疗程
		925	普通病案	湖北省武汉市青山区	青山区结核病防治所	湖北省武汉市青山区	青山区结核病防治所	420107018-2013-00168	925	22	男性	汉族	学生	本市其它县区	420107001		追踪	2013-07-01	2013-07-05	4	阴性	2013-08-07	湖北省武汉市青山区	青山区结核病防治所	湖北省武汉市青山区	青山区结核病防治所			2013-08-21 08	继发	病原学阴性		郑和平	2013-08-21	新患者	初治		2013-08-21							治疗	湖北省武汉市青山区	青山区结核病防治所		完成疗程
		926	普通病案	湖北省武汉市东湖高新技术开发区	武汉东湖新技术开发区佛祖岭社区卫生服务中心	湖北省武汉市东湖高新技术开发区	武汉东湖新技术开发区佛祖岭社区卫生服务中心	420192011-2013-01081	926	19	男性	汉族	学生	本市其它县区	420192002		追踪	2013-07-01	2013-08-23	53			湖北省武汉市东湖高新技术开发区	武汉东湖新技术开发区佛祖岭社区卫生服务中心	湖北省武汉市东湖高新技术开发区	武汉东湖新技术开发区佛祖岭社区卫生服务中心			2013-08-23 08	继发	病原学阳性		邱宏	2013-08-23	新患者	初治		2013-08-23							治疗	湖北省武汉市东湖高新技术开发区	武汉东湖新技术开发区佛祖岭社区卫生服务中心		治愈
		927	普通病案	湖北省武汉市武昌区	武昌区疾病预防控制中心	湖北省武汉市武昌区	武昌区疾病预防控制中心	420106010-2013-00463	927	21	男性	汉族	学生	本市其它县区	420106002		追踪	2013-06-19	2013-06-20	1	阴性	2013-08-23	湖北省武汉市武昌区	武昌区疾病预防控制中心	湖北省武汉市武昌区	武昌区疾病预防控制中心			2013-08-23 08	继发	病原学阴性		刘文	2013-08-23	新患者	初治		2013-08-23							治疗				完成疗程
		928	普通病案	湖北省武汉市洪山区	洪山区疾病预防控制中心	湖北省武汉市洪山区	洪山区疾病预防控制中心	420111016-2013-00440	928	22	男性	汉族	学生	本县区	420111001		转诊	2013-07-09	2013-07-26	17	阴性	2013-08-26	湖北省武汉市洪山区	洪山区疾病预防控制中心	湖北省武汉市洪山区	洪山区疾病预防控制中心			2013-08-26 08	继发	病原学阴性		吴杰	2013-08-26	新患者	初治		2013-08-26							治疗	湖北省武汉市洪山区	洪山区珞南街华中师范大学医院		完成疗程
		929	普通病案	湖北省武汉市江汉区	武汉市江汉区疾病预防控制中心	湖北省武汉市江汉区	武汉市江汉区疾病预防控制中心	420103013-2013-00285	929	15	男性	汉族	学生	本县区	420103001		转诊	2013-08-10	2013-08-10	0	阴性	2013-08-19	湖北省武汉市江汉区	武汉市江汉区疾病预防控制中心	湖北省武汉市江汉区	武汉市江汉区疾病预防控制中心			2013-08-28 08	继发	病原学阴性		连展杨杰人	2013-08-28	新患者	初治		2013-08-28							治疗	湖北省武汉市江汉区	江汉区民族街社区卫生服务中心		完成疗程
		930	普通病案	湖北省武汉市洪山区	洪山区疾病预防控制中心	湖北省武汉市洪山区	洪山区疾病预防控制中心	420111016-2013-00450	930	24	男性	汉族	学生	本县区	420111003		转诊	2013-08-30	2013-09-01	2	阴性	2013-09-02	湖北省武汉市洪山区	洪山区疾病预防控制中心	湖北省武汉市洪山区	洪山区疾病预防控制中心			2013-09-02 14	继发	病原学阴性		李仁惠	2013-09-02	新患者	初治		2013-09-02							治疗	湖北省武汉市洪山区	洪山区狮子山街华中农业大学医院		完成疗程
		931	普通病案	湖北省武汉市洪山区	洪山区疾病预防控制中心	湖北省武汉市洪山区	洪山区疾病预防控制中心	420111016-2013-00442	931	20	男性	汉族	学生	本县区	420111002		转诊	2013-08-17	2013-08-27	10	阴性	2013-09-02	湖北省武汉市洪山区	洪山区疾病预防控制中心	湖北省武汉市洪山区	洪山区疾病预防控制中心			2013-09-02 14	继发	病原学阴性		吴杰	2013-09-02	新患者	初治		2013-09-02							治疗	湖北省武汉市洪山区	洪山区疾病预防控制中心		完成疗程
		932	普通病案	湖北省武汉市洪山区	洪山区疾病预防控制中心	湖北省武汉市洪山区	洪山区疾病预防控制中心	420111016-2013-00449	932	23	男性	汉族	学生	本县区	420111002		转诊	2013-08-31	2013-09-01	1	阴性	2013-09-02	湖北省武汉市洪山区	洪山区疾病预防控制中心	湖北省武汉市洪山区	洪山区疾病预防控制中心			2013-09-02 14	继发	病原学阳性		吴杰	2013-09-02	新患者	初治		2013-09-02							治疗	湖北省武汉市洪山区	中国地质大学医院		治愈
		933	普通病案	湖北省武汉市武昌区	武昌区疾病预防控制中心	湖北省武汉市武昌区	武昌区疾病预防控制中心	420106010-2013-00489	933	25	女性	汉族	学生	本市其它县区	420106005		转诊	2013-08-25	2013-08-28	3	阴性	2013-09-06	湖北省武汉市硚口区	武汉市结核病防治所	湖北省武汉市硚口区	武汉市结核病防治所			2013-09-06 14	继发	病原学阳性		刘文	2013-09-06	新患者	初治		2013-09-06							治疗	湖北省武汉市硚口区	武汉市结核病防治所		治愈
		934	普通病案	湖北省武汉市硚口区	武汉市结核病防治所	湖北省武汉市硚口区	武汉市结核病防治所	420104019-2013-00390	934	16	男性	汉族	学生	本县区	420104004		追踪	2013-08-23	2013-09-09	17	阴性	2013-09-10	湖北省武汉市硚口区	武汉市结核病防治所	湖北省武汉市硚口区	武汉市结核病防治所			2013-09-10 11	继发	病原学阴性		罗艺	2013-09-10	新患者	初治		2013-09-10							治疗	湖北省武汉市硚口区	武汉市结核病防治所		完成疗程
		935	普通病案	湖北省武汉市洪山区	洪山区疾病预防控制中心	湖北省武汉市洪山区	洪山区疾病预防控制中心	420111016-2013-00466	935	21	男性	汉族	学生	本县区	420111002		转诊	2013-08-19	2013-08-22	3	阴性	2013-09-11	湖北省武汉市洪山区	洪山区疾病预防控制中心	湖北省武汉市洪山区	洪山区疾病预防控制中心			2013-09-11 09	继发	病原学阴性		吴杰	2013-09-11	新患者	初治		2013-09-11							治疗	湖北省武汉市洪山区	洪山区疾病预防控制中心		完成疗程
		936	普通病案	湖北省武汉市洪山区	洪山区疾病预防控制中心	湖北省武汉市洪山区	洪山区疾病预防控制中心	420111016-2013-00465	936	18	女性	汉族	学生	本县区	420111002		转诊	2013-09-08	2013-09-09	1	阴性	2013-09-11	湖北省武汉市洪山区	洪山区疾病预防控制中心	湖北省武汉市洪山区	洪山区疾病预防控制中心			2013-09-11 09	继发	病原学阴性		吴杰	2013-09-11	新患者	初治		2013-09-11							治疗	湖北省武汉市洪山区	洪山区疾病预防控制中心		完成疗程
		937	普通病案	湖北省武汉市洪山区	洪山区疾病预防控制中心	湖北省武汉市洪山区	洪山区疾病预防控制中心	420111016-2013-00464	937	19	女性	汉族	学生	本县区	420111001		转诊	2013-09-04	2013-09-06	2	阴性	2013-09-11	湖北省武汉市洪山区	洪山区疾病预防控制中心	湖北省武汉市洪山区	洪山区疾病预防控制中心			2013-09-11 08	继发	病原学阴性		李仁惠	2013-09-11	新患者	初治		2013-09-11							治疗	湖北省武汉市洪山区	洪山区珞南街华中师范大学医院		完成疗程
		938	普通病案	湖北省武汉市洪山区	洪山区疾病预防控制中心	湖北省武汉市洪山区	洪山区疾病预防控制中心	420111016-2013-00463	938	21	男性	汉族	学生	本县区	420111001		转诊	2013-09-08	2013-09-09	1	阴性	2013-09-11	湖北省武汉市洪山区	洪山区疾病预防控制中心	湖北省武汉市洪山区	洪山区疾病预防控制中心			2013-09-11 08	继发	病原学阴性		李仁惠	2013-09-11	新患者	初治		2013-09-11							治疗	湖北省武汉市洪山区	洪山区珞南街理工大社区卫生服务中心		完成疗程
		939	普通病案	湖北省武汉市蔡甸区	武汉市蔡甸区疾病预防控制中心	湖北省武汉市蔡甸区	武汉市蔡甸区疾病预防控制中心	420114003-2013-00300	939	18	男性	汉族	学生	本市其它县区	420114001		转诊	2013-09-05	2013-09-12	7			湖北省武汉市蔡甸区	武汉市蔡甸区疾病预防控制中心	湖北省武汉市蔡甸区	武汉市蔡甸区疾病预防控制中心			2013-09-12 15	继发	病原学阴性		刘晓燕	2013-09-12	新患者	初治		2013-09-12							治疗	湖北省武汉市蔡甸区	武汉市蔡甸区蔡甸街卫生院		完成疗程
		940	普通病案	湖北省武汉市黄陂区	武汉市黄陂区疾病预防控制中心	湖北省武汉市黄陂区	武汉市黄陂区疾病预防控制中心	420116003-2013-00445	940	16	女性	汉族	学生	本市其它县区	420116996		追踪	2013-08-23	2013-09-12	20			湖北省武汉市黄陂区	武汉市黄陂区疾病预防控制中心	湖北省武汉市黄陂区	武汉市黄陂区疾病预防控制中心			2013-09-12 09	继发	病原学阴性		胡兴无	2013-09-12	新患者	初治		2013-09-12							治疗	湖北省武汉市黄陂区	武汉盘龙城经济开发区卫生院		完成疗程
		941	普通病案	湖北省武汉市武昌区	武昌区疾病预防控制中心	湖北省武汉市武昌区	武昌区疾病预防控制中心	420106010-2013-00503	941	18	女性	藏族	学生	本县区	420106013		转诊	2013-08-20	2013-09-06	17	阴性	2013-09-13	湖北省武汉市武昌区	武昌区疾病预防控制中心	湖北省武汉市武昌区	武昌区疾病预防控制中心			2013-09-13 08	继发	病原学阴性		刘文	2013-09-13	新患者	初治		2013-09-13							治疗				完成疗程
		942	普通病案	湖北省武汉市洪山区	洪山区疾病预防控制中心	湖北省武汉市洪山区	洪山区疾病预防控制中心	420111016-2013-00469	942	22	男性	汉族	学生	本县区	420111002		转诊	2013-08-28	2013-09-11	14	阴性	2013-09-13	湖北省武汉市洪山区	洪山区疾病预防控制中心	湖北省武汉市洪山区	洪山区疾病预防控制中心			2013-09-13 09	继发	病原学阴性		李仁惠	2013-09-13	新患者	初治		2013-09-13							治疗	湖北省武汉市洪山区	洪山区关山街华中科技大学医院		完成疗程
		943	普通病案	湖北省武汉市洪山区	洪山区疾病预防控制中心	湖北省武汉市洪山区	洪山区疾病预防控制中心	420111016-2013-00467	943	19	男性	汉族	学生	本县区	420111006		转诊	2013-09-02	2013-09-12	10	阴性	2013-09-13	湖北省武汉市洪山区	洪山区疾病预防控制中心	湖北省武汉市洪山区	洪山区疾病预防控制中心			2013-09-13 08	继发	病原学阴性		李仁惠	2013-09-13	新患者	初治		2013-09-13							治疗	湖北省武汉市洪山区	洪山区疾病预防控制中心		完成疗程
		944	普通病案	湖北省武汉市武昌区	武昌区疾病预防控制中心	湖北省武汉市武昌区	武昌区疾病预防控制中心	420106010-2013-00505	944	24	女性	维吾尔族	学生	本县区	420106013		直接就诊	2013-09-09	2013-09-17	8	阴性	2013-09-17	湖北省武汉市武昌区	武昌区疾病预防控制中心	湖北省武汉市武昌区	武昌区疾病预防控制中心			2013-09-27 11	继发	病原学阳性		刘文	2013-09-17	新患者	初治		2013-09-17							治疗				治愈
		945	普通病案	湖北省武汉市洪山区	洪山区疾病预防控制中心	湖北省武汉市洪山区	洪山区疾病预防控制中心	420111016-2013-00475	945	19	男性	汉族	学生	本县区	420111001		转诊	2013-09-11	2013-09-15	4	阴性	2013-09-17	湖北省武汉市洪山区	洪山区疾病预防控制中心	湖北省武汉市洪山区	洪山区疾病预防控制中心			2013-09-17 09	继发	病原学阴性		吴杰	2013-09-17	新患者	初治		2013-09-17							治疗	湖北省武汉市洪山区	洪山区珞南街华中师范大学医院		完成疗程
		946	普通病案	湖北省武汉市洪山区	洪山区疾病预防控制中心	湖北省武汉市洪山区	洪山区疾病预防控制中心	420111016-2013-00473	946	20	男性	汉族	学生	本县区	420111001		转诊	2013-09-07	2013-09-16	9	阴性	2013-09-17	湖北省武汉市洪山区	洪山区疾病预防控制中心	湖北省武汉市洪山区	洪山区疾病预防控制中心			2013-09-17 09	继发	病原学阴性		吴杰	2013-09-17	新患者	初治		2013-09-17							治疗	湖北省武汉市洪山区	武汉市洪山区中医医院		完成疗程
		947	普通病案	湖北省武汉市洪山区	洪山区疾病预防控制中心	湖北省武汉市洪山区	洪山区疾病预防控制中心	420111016-2013-00476	947	19	男性	汉族	学生	本县区	420111001		转诊	2013-08-05	2013-09-15	41	阴性	2013-09-17	湖北省武汉市洪山区	洪山区疾病预防控制中心	湖北省武汉市洪山区	洪山区疾病预防控制中心			2013-09-17 09	继发	病原学阴性		李仁惠	2013-09-17	新患者	初治		2013-09-17							治疗	湖北省武汉市洪山区	洪山区珞南街理工大社区卫生服务中心		完成疗程
		948	普通病案	湖北省武汉市洪山区	洪山区疾病预防控制中心	湖北省武汉市洪山区	洪山区疾病预防控制中心	420111016-2013-00474	948	23	男性	汉族	学生	本县区	420111006		转诊	2013-09-11	2013-09-15	4	阴性	2013-09-17	湖北省武汉市洪山区	洪山区疾病预防控制中心	湖北省武汉市洪山区	洪山区疾病预防控制中心			2013-09-17 09	继发	病原学阴性		李仁惠	2013-09-17	新患者	初治		2013-09-17							治疗	湖北省武汉市洪山区	洪山区疾病预防控制中心		完成疗程
		949	普通病案	湖北省武汉市黄陂区	武汉市黄陂区疾病预防控制中心	湖北省武汉市黄陂区	武汉市黄陂区疾病预防控制中心	420116003-2013-00462	949	17	男性	汉族	学生	本市其它县区	420116003		转诊	2013-08-15	2013-09-04	20			湖北省武汉市黄陂区	武汉市黄陂区疾病预防控制中心	湖北省武汉市黄陂区	武汉市黄陂区疾病预防控制中心			2013-09-18 09	继发	病原学阴性		侯光华	2013-09-18	新患者	初治		2013-09-18							治疗	湖北省武汉市黄陂区	武汉市黄陂区横店街道中心卫生院		完成疗程
		950	普通病案	湖北省武汉市江岸区	江岸区疾病预防控制中心	湖北省武汉市江岸区	江岸区疾病预防控制中心	420102000-2013-00364	950	18	女性	汉族	学生	本市其它县区	420102005		转诊	2013-09-13	2013-09-17	4	未提供		湖北省武汉市江岸区	江岸区疾病预防控制中心	湖北省武汉市江岸区	江岸区疾病预防控制中心			2013-09-19 14	继发	病原学阴性		符志军	2013-09-19	新患者	初治		2013-09-19							治疗	湖北省武汉市江岸区	江岸区四唯街社区卫生服务中心		完成疗程
		951	普通病案	湖北省武汉市洪山区	洪山区疾病预防控制中心	湖北省武汉市洪山区	洪山区疾病预防控制中心	420111016-2013-00481	951	22	女性	汉族	学生	本县区	420111002		转诊	2013-09-12	2013-09-17	5	阴性	2013-09-22	湖北省武汉市洪山区	洪山区疾病预防控制中心	湖北省武汉市洪山区	洪山区疾病预防控制中心			2013-09-22 09	继发	病原学阴性		李仁惠	2013-09-22	新患者	初治		2013-09-22							治疗	湖北省武汉市洪山区	洪山区关山街华中科技大学医院		完成疗程
		952	普通病案	湖北省武汉市洪山区	洪山区疾病预防控制中心	湖北省武汉市洪山区	洪山区疾病预防控制中心	420111016-2013-00479	952	17	男性	汉族	学生	本县区	420111001		转诊	2013-09-09	2013-09-17	8	阴性	2013-09-22	湖北省武汉市洪山区	洪山区疾病预防控制中心	湖北省武汉市洪山区	洪山区疾病预防控制中心			2013-09-22 09	继发	病原学阴性		李仁惠	2013-09-22	新患者	初治		2013-09-22							治疗	湖北省武汉市洪山区	洪山区珞南街理工大社区卫生服务中心		完成疗程
		953	普通病案	湖北省武汉市洪山区	洪山区疾病预防控制中心	湖北省武汉市洪山区	洪山区疾病预防控制中心	420111016-2013-00480	953	18	男性	汉族	学生	本县区	420111001		转诊	2013-09-13	2013-09-17	4	阴性	2013-09-22	湖北省武汉市洪山区	洪山区疾病预防控制中心	湖北省武汉市洪山区	洪山区疾病预防控制中心			2013-09-22 09	继发	病原学阴性		李仁惠	2013-09-22	新患者	初治		2013-09-22							治疗	湖北省武汉市洪山区	洪山区珞南街理工大社区卫生服务中心		完成疗程
		954	普通病案	湖北省武汉市洪山区	洪山区疾病预防控制中心	湖北省武汉市洪山区	洪山区疾病预防控制中心	420111016-2013-00484	954	21	男性	汉族	学生	本县区	420111002		转诊	2013-09-18	2013-09-21	3	阴性	2013-09-22	湖北省武汉市洪山区	洪山区疾病预防控制中心	湖北省武汉市洪山区	洪山区疾病预防控制中心			2013-09-22 09	继发	病原学阴性		吴杰	2013-09-22	新患者	初治		2013-09-22							治疗	湖北省武汉市洪山区	洪山区关山街华中科技大学医院		完成疗程
		955	普通病案	湖北省武汉市洪山区	洪山区疾病预防控制中心	湖北省武汉市洪山区	洪山区疾病预防控制中心	420111016-2013-00482	955	20	女性	汉族	学生	本县区	420111001		转诊	2013-09-14	2013-09-17	3	阴性	2013-09-22	湖北省武汉市洪山区	洪山区疾病预防控制中心	湖北省武汉市洪山区	洪山区疾病预防控制中心			2013-09-22 09	继发	病原学阴性		李仁惠	2013-09-22	新患者	初治		2013-09-22							治疗	湖北省武汉市洪山区	洪山区珞南街华中师范大学医院		完成疗程
		956	普通病案	湖北省武汉市武昌区	武昌区疾病预防控制中心	湖北省武汉市武昌区	武昌区疾病预防控制中心	420106010-2013-00520	956	18	男性	汉族	学生	本县区	420106013		直接就诊	2013-09-16	2013-09-23	7	阴性	2013-09-23	湖北省武汉市武昌区	武昌区疾病预防控制中心	湖北省武汉市武昌区	武昌区疾病预防控制中心			2013-09-23 15	继发	病原学阴性		刘文	2013-09-23	新患者	初治		2013-09-23							治疗				完成疗程
		957	普通病案	湖北省武汉市黄陂区	武汉市黄陂区疾病预防控制中心	湖北省武汉市黄陂区	武汉市黄陂区疾病预防控制中心	420116003-2013-00465	957	20	女性	汉族	学生	本市其它县区	420116001		转诊	2013-09-08	2013-09-23	15			湖北省武汉市黄陂区	武汉市黄陂区疾病预防控制中心	湖北省武汉市黄陂区	武汉市黄陂区疾病预防控制中心			2013-09-23 10	继发	病原学阴性		汪惠兰	2013-09-23	新患者	初治		2013-09-23							治疗	湖北省武汉市黄陂区	武汉市黄陂区环城社区卫生服务中心		完成疗程
		958	普通病案	湖北省武汉市江汉区	武汉市江汉区疾病预防控制中心	湖北省武汉市江汉区	武汉市江汉区疾病预防控制中心	420103013-2013-00312	958	15	男性	汉族	学生	本县区	420103011		转诊	2013-09-12	2013-09-16	4	阴性	2013-09-16	湖北省武汉市江汉区	武汉市江汉区疾病预防控制中心	湖北省武汉市江汉区	武汉市江汉区疾病预防控制中心			2013-09-23 08	继发	病原学阴性		罗艺	2013-09-23	新患者	初治		2013-09-23							治疗	湖北省武汉市江汉区	江汉区前进街社区卫生服务中心		完成疗程
		959	普通病案	湖北省武汉市江夏区	武汉市江夏区疾病预防控制中心	湖北省武汉市江夏区	武汉市江夏区疾病预防控制中心	420115008-2013-00382	959	15	男性	汉族	学生	本县区	420115001		追踪	2013-07-31	2013-09-22	53	阴性	2013-09-22	湖北省武汉市江夏区	武汉市江夏区疾病预防控制中心	湖北省武汉市江夏区	武汉市江夏区疾病预防控制中心			2013-09-23 16	继发	病原学阴性		田晓春	2013-09-23	新患者	初治	2013-11-23	2013-09-23							治疗	湖北省武汉市江夏区	武汉市江夏区纸坊社区卫生服务中心		完成疗程
		960	普通病案	湖北省武汉市洪山区	洪山区疾病预防控制中心	湖北省武汉市洪山区	洪山区疾病预防控制中心	420111016-2013-00485	960	20	女性	汉族	学生	本县区	420111003		转诊	2013-09-12	2013-09-16	4	阴性	2013-09-23	湖北省武汉市洪山区	洪山区疾病预防控制中心	湖北省武汉市洪山区	洪山区疾病预防控制中心			2013-09-23 09	继发	病原学阴性		武汉	2013-09-23	新患者	初治		2013-09-23							治疗	湖北省武汉市洪山区	湖北工业大学医院		完成疗程
		961	普通病案	湖北省武汉市江汉区	武汉市江汉区疾病预防控制中心	湖北省武汉市江汉区	武汉市江汉区疾病预防控制中心	420103013-2013-00317	961	18	女性	汉族	学生	本县区	420103013		转诊	2013-09-18	2013-09-22	4	阴性	2013-09-19	湖北省武汉市江汉区	武汉市江汉区疾病预防控制中心	湖北省武汉市江汉区	武汉市江汉区疾病预防控制中心			2013-09-25 09	继发	病原学阳性		张伟	2013-09-25	新患者	初治		2013-09-25							治疗	湖北省武汉市江汉区	江汉区汉兴街社区卫生服务中心		治愈
		962	普通病案	湖北省武汉市洪山区	洪山区疾病预防控制中心	湖北省武汉市洪山区	洪山区疾病预防控制中心	420111016-2013-00489	962	18	女性	汉族	学生	本县区	420111002		转诊	2013-09-20	2013-09-22	2	阴性	2013-09-25	湖北省武汉市洪山区	洪山区疾病预防控制中心	湖北省武汉市洪山区	洪山区疾病预防控制中心			2013-09-25 08	继发	病原学阴性		李仁惠	2013-09-25	新患者	初治		2013-09-25							治疗	湖北省武汉市洪山区	洪山区疾病预防控制中心		完成疗程
		963	普通病案	湖北省武汉市汉南区	武汉市汉南区疾病预防控制中心	湖北省武汉市汉南区	武汉市汉南区疾病预防控制中心	420113006-2013-04005	963	19	男性	汉族	学生	本县区	420113096		追踪	2013-08-29	2013-08-30	1	阴性	2013-12-10	湖北省武汉市汉南区	武汉市汉南区疾病预防控制中心	湖北省武汉市汉南区	武汉市汉南区疾病预防控制中心			2013-09-25 09	继发	病原学阴性		芦艳婷	2013-09-25	新患者	初治		2013-09-25							治疗	湖北省武汉市汉南区	武汉市汉南区疾病预防控制中心		完成疗程
		964	普通病案	湖北省武汉市洪山区	洪山区疾病预防控制中心	湖北省武汉市洪山区	洪山区疾病预防控制中心	420111016-2013-00493	964	18	女性	汉族	学生	本县区	420111001		转诊	2013-09-23	2013-09-25	2	阴性	2013-09-26	湖北省武汉市洪山区	洪山区疾病预防控制中心	湖北省武汉市洪山区	洪山区疾病预防控制中心			2013-09-26 08	继发	病原学阴性		李仁惠	2013-09-26	新患者	初治		2013-09-26							治疗	湖北省武汉市洪山区	武汉市洪山区中医医院		完成疗程
		965	普通病案	湖北省武汉市洪山区	洪山区疾病预防控制中心	湖北省武汉市洪山区	洪山区疾病预防控制中心	420111016-2013-00494	965	22	女性	汉族	学生	本县区	420111003		转诊	2013-09-23	2013-09-25	2	阴性	2013-09-26	湖北省武汉市洪山区	洪山区疾病预防控制中心	湖北省武汉市洪山区	洪山区疾病预防控制中心			2013-09-26 08	继发	病原学阴性		李仁惠	2013-09-26	新患者	初治		2013-09-26							治疗	湖北省武汉市洪山区	湖北工业大学医院		完成疗程
		966	普通病案	湖北省武汉市新洲区	新洲区疾病预防控制中心	湖北省武汉市新洲区	新洲区疾病预防控制中心	420117002-2013-00519	966	21	女性	汉族	学生	本县区	420117002		追踪	2013-08-10	2013-09-27	48			湖北省武汉市新洲区	新洲区疾病预防控制中心	湖北省武汉市新洲区	新洲区疾病预防控制中心			2013-09-27 09	继发	病原学阳性		邓其军	2013-09-27	新患者	初治		2013-09-27							治疗	湖北省武汉市新洲区	新洲区阳逻街卫生院		治愈
		967	普通病案	湖北省武汉市硚口区	武汉市结核病防治所	湖北省武汉市硚口区	武汉市结核病防治所	420104019-2013-00409	967	24	女性	汉族	学生	本县区	420104005		转诊	2013-09-20	2013-09-26	6	阴性	2013-09-27	湖北省武汉市硚口区	武汉市结核病防治所	湖北省武汉市硚口区	武汉市结核病防治所			2013-09-27 08	继发	病原学阳性		李佺	2013-09-27	新患者	初治		2013-09-27							治疗	湖北省武汉市硚口区	武汉市结核病防治所		治愈
		968	普通病案	湖北省武汉市洪山区	洪山区疾病预防控制中心	湖北省武汉市洪山区	洪山区疾病预防控制中心	420111016-2013-00498	968	23	女性	汉族	学生	本县区	420111003		转诊	2013-09-16	2013-09-26	10	阴性	2013-09-27	湖北省武汉市洪山区	洪山区疾病预防控制中心	湖北省武汉市洪山区	洪山区疾病预防控制中心			2013-09-27 08	继发	病原学阴性		吴杰	2013-09-27	新患者	初治		2013-09-27							治疗	湖北省武汉市洪山区	洪山区狮子山街华中农业大学医院		完成疗程
		969	普通病案	湖北省武汉市洪山区	洪山区疾病预防控制中心	湖北省武汉市洪山区	洪山区疾病预防控制中心	420111016-2013-00497	969	22	女性	汉族	学生	本县区	420111002		转诊	2013-09-20	2013-09-25	5	阴性	2013-09-27	湖北省武汉市洪山区	洪山区疾病预防控制中心	湖北省武汉市洪山区	洪山区疾病预防控制中心			2013-09-27 08	继发	病原学阴性		李仁惠	2013-09-27	新患者	初治		2013-09-27							治疗	湖北省武汉市洪山区	洪山区疾病预防控制中心		完成疗程
		970	普通病案	湖北省武汉市东西湖区	东西湖区结核病防治所	湖北省武汉市东西湖区	东西湖区结核病防治所	420112019-2013-00177	970	21	男性	汉族	学生	本县区	420112001		转诊	2013-07-02	2013-09-29	89	未提供		湖北省武汉市东西湖区	东西湖区结核病防治所	湖北省武汉市东西湖区	东西湖区结核病防治所			2013-09-29 15	继发	病原学阳性		孟刚	2013-09-29	新患者	初治		2013-09-29							治疗	湖北省武汉市东西湖区	东西湖区吴家山街社区卫生服务中心		治愈
		971	普通病案	湖北省武汉市江夏区	武汉市江夏区疾病预防控制中心	湖北省武汉市江夏区	武汉市江夏区疾病预防控制中心	420115008-2013-00396	971	20	男性	汉族	学生	本县区	420115405		直接就诊	2013-08-03	2013-09-27	55	阴性	2013-09-30	湖北省武汉市江夏区	武汉市江夏区疾病预防控制中心	湖北省武汉市江夏区	武汉市江夏区疾病预防控制中心			2013-10-01 08	继发	病原学阳性		蒋在慧	2013-10-01	新患者	初治	2013-12-01	2013-10-01							治疗	湖北省武汉市江夏区	武汉市江夏区经济开发区大桥新区卫生院		治愈
		972	普通病案	湖北省武汉市黄陂区	武汉市黄陂区疾病预防控制中心	湖北省武汉市黄陂区	武汉市黄陂区疾病预防控制中心	420116003-2013-00489	972	20	女性	汉族	学生	本市其它县区	420116005		转诊	2013-09-10	2013-09-30	20			湖北省武汉市黄陂区	武汉市黄陂区疾病预防控制中心	湖北省武汉市黄陂区	武汉市黄陂区疾病预防控制中心			2013-10-04 09	继发	病原学阴性		汪惠兰	2013-10-04	新患者	初治		2013-10-04							治疗	湖北省武汉市黄陂区	武汉市黄陂区滠口街道卫生院		完成疗程
		973	普通病案	湖北省武汉市汉南区	武汉市汉南区疾病预防控制中心	湖北省武汉市汉南区	武汉市汉南区疾病预防控制中心	420113006-2013-02041	973	19	男性	汉族	学生	本县区	420113096		转诊	2013-09-01	2013-09-03	2	阴性	2013-09-05	湖北省武汉市汉南区	武汉市汉南区疾病预防控制中心	湖北省武汉市汉南区	武汉市汉南区疾病预防控制中心			2013-10-04 14	继发	病原学阴性		聂绪军	2013-10-04	新患者	初治	2013-11-05	2013-10-04							治疗	湖北省武汉市汉南区	武汉市汉南区疾病预防控制中心		完成疗程
		974	普通病案	湖北省武汉市江岸区	江岸区疾病预防控制中心	湖北省武汉市江岸区	江岸区疾病预防控制中心	420102000-2013-00389	974	18	男性	汉族	学生	本县区	420102014		追踪	2013-10-07	2013-10-08	1			湖北省武汉市江岸区	江岸区疾病预防控制中心	湖北省武汉市江岸区	江岸区疾病预防控制中心			2013-10-08 09	继发	病原学阴性		叶惠	2013-10-08	新患者	初治		2013-10-08							治疗	湖北省武汉市江岸区	长江航运总医院		完成疗程
		975	普通病案	湖北省武汉市江汉区	武汉市江汉区疾病预防控制中心	湖北省武汉市江汉区	武汉市江汉区疾病预防控制中心	420103013-2013-00320	975	19	男性	汉族	学生	本县区	420103008		追踪	2013-09-20	2013-09-24	4	阴性	2013-09-14	湖北省武汉市江汉区	武汉市江汉区疾病预防控制中心	湖北省武汉市江汉区	武汉市江汉区疾病预防控制中心			2013-10-08 08	继发	病原学阴性		刘小玉	2013-10-08	新患者	初治		2013-10-08							治疗	湖北省武汉市江汉区	江汉区万松街社区卫生服务中心		完成疗程
		976	普通病案	湖北省武汉市东西湖区	东西湖区结核病防治所	湖北省武汉市东西湖区	东西湖区结核病防治所	420112019-2013-00181	976	19	男性	汉族	学生	本县区	420112400		转诊	2013-08-26	2013-09-30	35	阴性	2013-10-08	湖北省武汉市东西湖区	东西湖区结核病防治所	湖北省武汉市东西湖区	东西湖区结核病防治所			2013-10-08 16	继发	病原学阴性		孟刚	2013-10-08	新患者	初治		2013-10-08							治疗	湖北省武汉市东西湖区	常青花园社区卫生服务中心		完成疗程
		977	普通病案	湖北省武汉市洪山区	洪山区疾病预防控制中心	湖北省武汉市洪山区	洪山区疾病预防控制中心	420111016-2013-00502	977	22	女性	汉族	学生	本县区	420111003		转诊	2013-09-27	2013-09-29	2	阴性	2013-10-08	湖北省武汉市洪山区	洪山区疾病预防控制中心	湖北省武汉市洪山区	洪山区疾病预防控制中心			2013-10-08 08	继发	病原学阴性		李仁惠	2013-10-08	新患者	初治		2013-10-08							治疗	湖北省武汉市洪山区	洪山区狮子山街华中农业大学医院		完成疗程
		978	普通病案	湖北省武汉市洪山区	洪山区疾病预防控制中心	湖北省武汉市洪山区	洪山区疾病预防控制中心	420111016-2013-00514	978	21	男性	汉族	学生	本市其它县区	420111002		转诊	2013-09-23	2013-09-30	7	初筛阳性	2013-10-08	湖北省武汉市洪山区	洪山区疾病预防控制中心	湖北省武汉市洪山区	洪山区疾病预防控制中心			2013-10-08 10	继发	病原学阴性		吴杰	2013-10-08	新患者	初治		2013-10-08							治疗	湖北省武汉市洪山区	洪山区疾病预防控制中心		完成疗程
		979	普通病案	湖北省武汉市洪山区	洪山区疾病预防控制中心	湖北省武汉市洪山区	洪山区疾病预防控制中心	420111016-2013-00501	979	18	女性	汉族	学生	本县区	420111002		转诊	2013-08-30	2013-09-29	30	阴性	2013-10-08	湖北省武汉市洪山区	洪山区疾病预防控制中心	湖北省武汉市洪山区	洪山区疾病预防控制中心			2013-10-08 09	继发	病原学阴性		吴杰	2013-10-08	新患者	初治		2013-10-08							治疗	湖北省武汉市洪山区	洪山区关山街华中科技大学医院		完成疗程
		980	普通病案	湖北省武汉市洪山区	洪山区疾病预防控制中心	湖北省武汉市洪山区	洪山区疾病预防控制中心	420111016-2013-00516	980	20	男性	汉族	学生	本县区	420111002		转诊	2013-09-01	2013-10-02	31	阴性	2013-10-08	湖北省武汉市洪山区	洪山区疾病预防控制中心	湖北省武汉市洪山区	洪山区疾病预防控制中心			2013-10-08 10	继发	病原学阴性		吴杰	2013-10-08	新患者	初治		2013-10-08							治疗	湖北省武汉市洪山区	洪山区关山街华中科技大学医院		完成疗程
		981	普通病案	湖北省武汉市洪山区	洪山区疾病预防控制中心	湖北省武汉市洪山区	洪山区疾病预防控制中心	420111016-2013-00509	981	20	男性	汉族	学生	本县区	420111002		转诊	2013-09-10	2013-09-26	16	阴性	2013-10-08	湖北省武汉市洪山区	洪山区疾病预防控制中心	湖北省武汉市洪山区	洪山区疾病预防控制中心			2013-10-08 10	继发	病原学阴性		李仁惠	2013-10-08	新患者	初治		2013-10-08							治疗	湖北省武汉市洪山区	洪山区疾病预防控制中心		完成疗程
		982	普通病案	湖北省武汉市洪山区	洪山区疾病预防控制中心	湖北省武汉市洪山区	洪山区疾病预防控制中心	420111016-2013-00504	982	19	男性	汉族	学生	本县区	420111003		转诊	2013-09-23	2013-09-29	6	阴性	2013-10-08	湖北省武汉市洪山区	洪山区疾病预防控制中心	湖北省武汉市洪山区	洪山区疾病预防控制中心			2013-10-08 08	继发	病原学阴性		李仁惠	2013-10-08	新患者	初治		2013-10-08							治疗	湖北省武汉市洪山区	湖北工业大学医院		完成疗程
		983	普通病案	湖北省武汉市洪山区	洪山区疾病预防控制中心	湖北省武汉市洪山区	洪山区疾病预防控制中心	420111016-2013-00499	983	21	女性	汉族	学生	本县区	420111001		转诊	2013-09-03	2013-09-04	1	阴性	2013-10-08	湖北省武汉市洪山区	洪山区疾病预防控制中心	湖北省武汉市洪山区	洪山区疾病预防控制中心			2013-10-08 09	继发	病原学阴性		李仁惠	2013-10-08	新患者	初治		2013-10-08							治疗	湖北省武汉市洪山区	洪山区珞南街理工大社区卫生服务中心		完成疗程
		984	普通病案	湖北省武汉市洪山区	洪山区疾病预防控制中心	湖北省武汉市洪山区	洪山区疾病预防控制中心	420111016-2013-00515	984	21	男性	汉族	学生	本县区	420111002		转诊	2013-06-09	2013-10-02	115	阴性	2013-10-08	湖北省武汉市洪山区	洪山区疾病预防控制中心	湖北省武汉市洪山区	洪山区疾病预防控制中心			2013-10-08 10	继发	病原学阳性		李仁惠	2013-10-08	新患者	初治		2013-10-08							治疗	湖北省武汉市洪山区	洪山区疾病预防控制中心		治愈
		985	普通病案	湖北省武汉市洪山区	洪山区疾病预防控制中心	湖北省武汉市洪山区	洪山区疾病预防控制中心	420111016-2013-00512	985	21	女性	汉族	学生	本县区	420111002		转诊	2013-10-05	2013-10-07	2	阴性	2013-10-08	湖北省武汉市洪山区	洪山区疾病预防控制中心	湖北省武汉市洪山区	洪山区疾病预防控制中心			2013-10-08 08	继发	病原学阴性		李仁惠	2013-10-08	新患者	初治		2013-10-08							治疗	湖北省武汉市洪山区	洪山区关山街华中科技大学医院		完成疗程
		986	普通病案	湖北省武汉市江夏区	武汉市江夏区疾病预防控制中心	湖北省武汉市江夏区	武汉市江夏区疾病预防控制中心	420115008-2013-00397	986	16	男性	汉族	学生	本县区	420115405		转诊	2013-08-20	2013-09-09	20	拒查		湖北省武汉市江夏区	武汉市江夏区疾病预防控制中心	湖北省武汉市江夏区	武汉市江夏区疾病预防控制中心			2013-10-09 10	继发	病原学阴性		田晓春	2013-10-09	新患者	初治	2013-12-09	2013-10-09							治疗	湖北省武汉市江夏区	武汉市江夏区经济开发区大桥新区卫生院		完成疗程
		987	普通病案	湖北省武汉市江夏区	武汉市江夏区疾病预防控制中心	湖北省武汉市江夏区	武汉市江夏区疾病预防控制中心	420115008-2013-00403	987	23	男性	布依族	学生	本县区	420115001		转诊	2013-09-04	2013-09-19	15	阴性	2013-10-09	湖北省武汉市江夏区	武汉市江夏区疾病预防控制中心	湖北省武汉市江夏区	武汉市江夏区疾病预防控制中心			2013-10-10 14	继发	病原学阴性		田晓春	2013-10-10	新患者	初治	2013-12-10	2013-10-10							治疗	湖北省武汉市江夏区	武汉市江夏区纸坊社区卫生服务中心		完成疗程
		988	普通病案	湖北省武汉市武昌区	武昌区疾病预防控制中心	湖北省武汉市武昌区	武昌区疾病预防控制中心	420106010-2013-00539	988	18	男性	汉族	学生	本市其它县区	420106013		转诊	2013-09-05	2013-09-23	18	阴性	2013-10-11	湖北省武汉市武昌区	武昌区疾病预防控制中心	湖北省武汉市武昌区	武昌区疾病预防控制中心			2013-10-11 11	继发	病原学阳性		刘文	2013-10-11	新患者	初治		2013-10-11							治疗				治愈
		989	普通病案	湖北省武汉市汉阳区	武汉市汉阳区结核病防治所	湖北省武汉市汉阳区	武汉市汉阳区结核病防治所	420105012-2013-00285	989	16	男性	汉族	学生	本县区	420105008		转诊	2013-09-14	2013-10-08	24	阴性	2013-09-26	湖北省武汉市汉阳区	武汉市汉阳区结核病防治所	湖北省武汉市汉阳区	武汉市汉阳区结核病防治所			2013-10-11 08	继发	病原学阳性		朱建	2013-10-11	新患者	初治	2013-11-26	2013-10-11							治疗	湖北省武汉市汉阳区	汉阳区琴断口街社区卫生服务中心		治愈
		990	普通病案	湖北省武汉市汉阳区	武汉市汉阳区结核病防治所	湖北省武汉市汉阳区	武汉市汉阳区结核病防治所	420105012-2013-00289	990	14	男性	汉族	学生	本县区	420105011		转诊	2013-09-03	2013-09-04	1	阴性	2013-09-10	湖北省武汉市汉阳区	武汉市汉阳区结核病防治所	湖北省武汉市汉阳区	武汉市汉阳区结核病防治所			2013-10-14 08	继发	病原学阴性		周震	2013-10-14	新患者	初治	2013-11-10	2013-10-14							治疗	湖北省武汉市汉阳区	武汉市汉阳区江堤街社区卫生服务中心		完成疗程
		991	普通病案	湖北省武汉市硚口区	武汉市结核病防治所	湖北省武汉市硚口区	武汉市结核病防治所	420104019-2013-00427	991	14	女性	汉族	学生	本县区	420104004		转诊	2013-10-10	2013-10-13	3	阴性	2013-10-14	湖北省武汉市硚口区	武汉市结核病防治所	湖北省武汉市硚口区	武汉市结核病防治所			2013-10-14 08	继发	病原学阳性		姚芳	2013-10-14	新患者	初治		2013-10-14							治疗	湖北省武汉市硚口区	武汉市结核病防治所		治愈
		992	普通病案	湖北省武汉市江夏区	武汉市江夏区疾病预防控制中心	湖北省武汉市江夏区	武汉市江夏区疾病预防控制中心	420115008-2013-00422	992	16	男性	汉族	学生	本县区	420115001		转诊	2013-09-15	2013-10-07	22			湖北省武汉市江夏区	武汉市江夏区疾病预防控制中心	湖北省武汉市江夏区	武汉市江夏区疾病预防控制中心			2013-10-16 16	继发	病原学阴性		田晓春	2013-10-16	新患者	初治	2013-12-16	2013-10-16							治疗	湖北省武汉市江夏区	武汉市江夏区纸坊社区卫生服务中心		完成疗程
		993	普通病案	湖北省武汉市汉南区	武汉市汉南区疾病预防控制中心	湖北省武汉市汉南区	武汉市汉南区疾病预防控制中心	420113006-2013-02043	993	21	女性	汉族	学生	本县区	420113096		追踪	2013-09-03	2013-09-10	7	阴性	2013-09-11	湖北省武汉市汉南区	武汉市汉南区疾病预防控制中心	湖北省武汉市汉南区	武汉市汉南区疾病预防控制中心			2013-10-17 14	继发	病原学阳性		聂绪军	2013-10-17	复发	复治	2013-11-11	2013-10-17							治疗				完成疗程
		994	普通病案	湖北省武汉市东湖高新技术开发区	武汉东湖新技术开发区佛祖岭社区卫生服务中心	湖北省武汉市东湖高新技术开发区	武汉东湖新技术开发区佛祖岭社区卫生服务中心	420192011-2013-01107	994	18	女性	汉族	学生	本市其它县区	420192002		追踪	2013-09-10	2013-10-18	38	阴性	2013-09-22	湖北省武汉市东湖高新技术开发区	武汉东湖新技术开发区佛祖岭社区卫生服务中心	湖北省武汉市东湖高新技术开发区	武汉东湖新技术开发区佛祖岭社区卫生服务中心			2013-10-18 09	继发	病原学阴性		邱宏	2013-10-18	新患者	初治		2013-10-18							治疗	湖北省武汉市东湖高新技术开发区	武汉东湖新技术开发区佛祖岭社区卫生服务中心		完成疗程
		995	普通病案	湖北省武汉市武昌区	武昌区疾病预防控制中心	湖北省武汉市武昌区	武昌区疾病预防控制中心	420106010-2013-00556	995	19	男性	汉族	学生	本市其它县区	420106013		追踪	2013-05-27	2013-06-09	13	阴性	2013-10-18	湖北省武汉市武昌区	武昌区疾病预防控制中心	湖北省武汉市武昌区	武昌区疾病预防控制中心			2013-10-18 10	继发	病原学阳性		刘文	2013-10-18	新患者	初治		2013-10-18							治疗				治愈
		996	普通病案	湖北省武汉市武昌区	武昌区疾病预防控制中心	湖北省武汉市武昌区	武昌区疾病预防控制中心	420106010-2013-00561	996	18	女性	汉族	学生	本县区	420106015		直接就诊	2013-10-09	2013-10-18	9	阴性	2013-10-18	湖北省武汉市武昌区	武昌区疾病预防控制中心	湖北省武汉市武昌区	武昌区疾病预防控制中心			2013-10-18 14	继发	病原学阴性		刘文	2013-10-18	新患者	初治		2013-10-18							治疗				完成疗程
		997	普通病案	湖北省武汉市蔡甸区	武汉市蔡甸区疾病预防控制中心	湖北省武汉市蔡甸区	武汉市蔡甸区疾病预防控制中心	420114003-2013-00339	997	20	男性	汉族	学生	本县区	420114001		直接就诊	2013-10-02	2013-10-18	16			湖北省武汉市蔡甸区	武汉市蔡甸区疾病预防控制中心	湖北省武汉市蔡甸区	武汉市蔡甸区疾病预防控制中心			2013-10-18 16	继发	病原学阴性		刘晓燕	2013-10-18	新患者	初治		2013-10-18							治疗	湖北省武汉市蔡甸区	武汉市蔡甸区蔡甸街卫生院		完成疗程
		998	普通病案	湖北省武汉市洪山区	洪山区疾病预防控制中心	湖北省武汉市洪山区	洪山区疾病预防控制中心	420111016-2013-00531	998	24	女性	汉族	学生	本县区	420111001		转诊	2013-06-15	2013-10-07	114	阴性	2013-10-18	湖北省武汉市洪山区	洪山区疾病预防控制中心	湖北省武汉市洪山区	洪山区疾病预防控制中心			2013-10-18 09	继发	病原学阳性		吴杰	2013-10-18	新患者	初治		2013-10-18							治疗	湖北省武汉市洪山区	武汉市洪山区中医医院		治愈
		999	普通病案	湖北省武汉市洪山区	洪山区疾病预防控制中心	湖北省武汉市洪山区	洪山区疾病预防控制中心	420111016-2013-00526	999	18	女性	汉族	学生	本县区	420111003		转诊	2013-10-01	2013-10-14	13	阴性	2013-10-18	湖北省武汉市洪山区	洪山区疾病预防控制中心	湖北省武汉市洪山区	洪山区疾病预防控制中心			2013-10-18 09	继发	病原学阴性		吴杰	2013-10-18	新患者	初治		2013-10-18							治疗	湖北省武汉市洪山区	湖北工业大学医院		完成疗程
		1000	普通病案	湖北省武汉市洪山区	洪山区疾病预防控制中心	湖北省武汉市洪山区	洪山区疾病预防控制中心	420111016-2013-00530	1000	18	男性	汉族	学生	本县区	420111002		转诊	2013-09-01	2013-10-16	45	阴性	2013-10-18	湖北省武汉市洪山区	洪山区疾病预防控制中心	湖北省武汉市洪山区	洪山区疾病预防控制中心			2013-10-18 09	继发	病原学阴性		吴杰	2013-10-18	新患者	初治		2013-10-18							治疗	湖北省武汉市洪山区	武汉市第三医院光谷院区		完成疗程
		1001	普通病案	湖北省武汉市洪山区	洪山区疾病预防控制中心	湖北省武汉市洪山区	洪山区疾病预防控制中心	420111016-2013-00532	1001	23	男性	汉族	学生	本县区	420111001		转诊	2013-10-05	2013-10-07	2	阴性	2013-10-18	湖北省武汉市洪山区	洪山区疾病预防控制中心	湖北省武汉市洪山区	洪山区疾病预防控制中心			2013-10-18 09	继发	病原学阴性		李仁惠	2013-10-18	新患者	初治		2013-10-18							治疗	湖北省武汉市洪山区	洪山区珞南街华中师范大学医院		完成疗程
		1002	普通病案	湖北省武汉市洪山区	洪山区疾病预防控制中心	湖北省武汉市洪山区	洪山区疾病预防控制中心	420111016-2013-00535	1002	19	男性	汉族	学生	本县区	420111002		转诊	2013-09-09	2013-10-09	30	阴性	2013-10-18	湖北省武汉市洪山区	洪山区疾病预防控制中心	湖北省武汉市洪山区	洪山区疾病预防控制中心			2013-10-18 10	继发	病原学阴性		李仁惠	2013-10-18	新患者	初治		2013-10-18							治疗	湖北省武汉市洪山区	洪山区疾病预防控制中心		完成疗程
		1003	普通病案	湖北省武汉市洪山区	洪山区疾病预防控制中心	湖北省武汉市洪山区	洪山区疾病预防控制中心	420111016-2013-00522	1003	20	男性	汉族	学生	本县区	420111006		转诊	2013-10-05	2013-10-12	7	阴性	2013-10-18	湖北省武汉市洪山区	洪山区疾病预防控制中心	湖北省武汉市洪山区	洪山区疾病预防控制中心			2013-10-18 09	继发	病原学阳性		李仁惠	2013-10-18	新患者	初治		2013-10-18							治疗	湖北省武汉市洪山区	洪山区疾病预防控制中心		治愈
		1004	普通病案	湖北省武汉市洪山区	洪山区疾病预防控制中心	湖北省武汉市洪山区	洪山区疾病预防控制中心	420111016-2013-00520	1004	19	女性	汉族	学生	本县区	420111002		转诊	2013-09-17	2013-09-23	6	阴性	2013-10-18	湖北省武汉市洪山区	洪山区疾病预防控制中心	湖北省武汉市洪山区	洪山区疾病预防控制中心			2013-10-18 08	继发	病原学阴性		李仁惠	2013-10-18	新患者	初治		2013-10-18							治疗	湖北省武汉市洪山区	中国地质大学医院		完成疗程
		1005	普通病案	湖北省武汉市洪山区	洪山区疾病预防控制中心	湖北省武汉市洪山区	洪山区疾病预防控制中心	420111016-2013-00527	1005	20	女性	汉族	学生	本县区	420111003		转诊	2013-10-10	2013-10-13	3	阴性	2013-10-18	湖北省武汉市洪山区	洪山区疾病预防控制中心	湖北省武汉市洪山区	洪山区疾病预防控制中心			2013-10-18 09	继发	病原学阴性		李仁惠	2013-10-18	新患者	初治		2013-10-18							治疗	湖北省武汉市洪山区	湖北工业大学医院		完成疗程
		1006	普通病案	湖北省武汉市洪山区	洪山区疾病预防控制中心	湖北省武汉市洪山区	洪山区疾病预防控制中心	420111016-2013-00533	1006	19	女性	汉族	学生	本县区	420111006		转诊	2013-09-02	2013-09-16	14	阴性	2013-10-18	湖北省武汉市洪山区	洪山区疾病预防控制中心	湖北省武汉市洪山区	洪山区疾病预防控制中心			2013-10-18 08	继发	病原学阴性		李仁惠	2013-10-18	新患者	初治		2013-10-18							治疗	湖北省武汉市洪山区	洪山区疾病预防控制中心		完成疗程
		1007	普通病案	湖北省武汉市硚口区	武汉市结核病防治所	湖北省武汉市硚口区	武汉市结核病防治所	420104019-2013-00434	1007	10	男性	汉族	学生	本县区	420104009		转诊	2013-10-06	2013-10-20	14	阴性	2013-10-21	湖北省武汉市硚口区	武汉市结核病防治所	湖北省武汉市硚口区	武汉市结核病防治所			2013-10-21 09	继发	病原学阴性		胡冥慧	2013-10-21	新患者	初治		2013-10-21							治疗	湖北省武汉市硚口区	武汉市结核病防治所		完成疗程
		1008	普通病案	湖北省武汉市洪山区	洪山区疾病预防控制中心	湖北省武汉市洪山区	洪山区疾病预防控制中心	420111016-2013-00545	1008	20	男性	汉族	学生	本县区	420111004		转诊	2013-10-07	2013-10-20	13	阴性	2013-10-21	湖北省武汉市洪山区	洪山区疾病预防控制中心	湖北省武汉市洪山区	洪山区疾病预防控制中心			2013-10-21 15	继发	病原学阴性		李仁惠	2013-10-21	新患者	初治		2013-10-21							治疗	湖北省武汉市洪山区	武汉市洪山区张家湾街社区卫生中心		完成疗程
		1009	普通病案	湖北省武汉市洪山区	洪山区疾病预防控制中心	湖北省武汉市洪山区	洪山区疾病预防控制中心	420111016-2013-00541	1009	20	男性	汉族	学生	本县区	420111001		转诊	2013-10-07	2013-10-17	10	阴性	2013-10-21	湖北省武汉市洪山区	洪山区疾病预防控制中心	湖北省武汉市洪山区	洪山区疾病预防控制中心			2013-10-21 15	继发	病原学阴性		李仁惠	2013-10-21	新患者	初治		2013-10-21							治疗	湖北省武汉市洪山区	武汉市洪山区中医医院		完成疗程
		1010	普通病案	湖北省武汉市洪山区	洪山区疾病预防控制中心	湖北省武汉市洪山区	洪山区疾病预防控制中心	420111016-2013-00543	1010	24	女性	汉族	学生	本县区	420111002		转诊	2013-08-19	2013-10-20	62	阴性	2013-10-21	湖北省武汉市洪山区	洪山区疾病预防控制中心	湖北省武汉市洪山区	洪山区疾病预防控制中心			2013-10-21 15	继发	病原学阴性		李仁惠	2013-10-21	新患者	初治		2013-10-21							治疗	湖北省武汉市洪山区	洪山区关山街华中科技大学医院		完成疗程
		1011	普通病案	湖北省武汉市洪山区	洪山区疾病预防控制中心	湖北省武汉市洪山区	洪山区疾病预防控制中心	420111016-2013-00539	1011	21	男性	汉族	学生	本县区	420111002		转诊	2013-09-17	2013-10-11	24	阴性	2013-10-21	湖北省武汉市洪山区	洪山区疾病预防控制中心	湖北省武汉市洪山区	洪山区疾病预防控制中心			2013-10-21 15	继发	病原学阴性		李仁惠	2013-10-21	新患者	初治		2013-10-21							治疗	湖北省武汉市洪山区	中国地质大学医院		完成疗程
		1012	普通病案	湖北省武汉市黄陂区	武汉市黄陂区疾病预防控制中心	湖北省武汉市黄陂区	武汉市黄陂区疾病预防控制中心	420116003-2013-00540	1012	18	女性	汉族	学生	本市其它县区	420116003		转诊	2013-09-01	2013-10-22	51			湖北省武汉市黄陂区	武汉市黄陂区疾病预防控制中心	湖北省武汉市黄陂区	武汉市黄陂区疾病预防控制中心			2013-10-22 09	继发	病原学阳性		汪亮	2013-10-22	新患者	初治		2013-10-22							治疗	湖北省武汉市黄陂区	武汉市黄陂区横店街道中心卫生院		治愈
		1013	普通病案	湖北省武汉市黄陂区	武汉市黄陂区疾病预防控制中心	湖北省武汉市黄陂区	武汉市黄陂区疾病预防控制中心	420116003-2013-00537	1013	19	女性	汉族	学生	本市其它县区	420116008		转诊	2013-09-25	2013-10-22	27			湖北省武汉市黄陂区	武汉市黄陂区疾病预防控制中心	湖北省武汉市黄陂区	武汉市黄陂区疾病预防控制中心			2013-10-22 09	继发	病原学阴性		汪亮	2013-10-22	新患者	初治		2013-10-22							治疗	湖北省武汉市黄陂区	武汉市黄陂区武湖街卫生院		完成疗程
		1014	普通病案	湖北省武汉市东西湖区	东西湖区结核病防治所	湖北省武汉市东西湖区	东西湖区结核病防治所	420112019-2013-00195	1014	16	男性	汉族	学生	本县区	420112004		转诊	2013-10-06	2013-10-18	12	阴性	2013-10-11	湖北省武汉市东西湖区	东西湖区结核病防治所	湖北省武汉市东西湖区	东西湖区结核病防治所			2013-10-22 15	继发	病原学阴性		胡才生	2013-10-22	新患者	初治		2013-10-22							治疗	湖北省武汉市东西湖区	东西湖区将军路街卫生院		完成疗程
		1015	普通病案	湖北省武汉市硚口区	武汉市结核病防治所	湖北省武汉市硚口区	武汉市结核病防治所	420104019-2013-00440	1015	15	男性	汉族	学生	本县区	420104012		转诊	2013-09-27	2013-10-21	24	阴性	2013-10-22	湖北省武汉市硚口区	武汉市结核病防治所	湖北省武汉市硚口区	武汉市结核病防治所			2013-10-22 09	继发	病原学阴性		孙学智	2013-10-22	新患者	初治		2013-10-22							治疗	湖北省武汉市硚口区	武汉市结核病防治所		完成疗程
		1016	普通病案	湖北省武汉市江夏区	武汉市江夏区疾病预防控制中心	湖北省武汉市江夏区	武汉市江夏区疾病预防控制中心	420115008-2013-00430	1016	20	男性	汉族	学生	本县区	420115405		转诊	2013-09-15	2013-10-15	30	阴性	2013-10-18	湖北省武汉市江夏区	武汉市江夏区疾病预防控制中心	湖北省武汉市江夏区	武汉市江夏区疾病预防控制中心			2013-10-23 15	继发	病原学阴性		田晓春	2013-10-23	新患者	初治	2013-12-23	2013-10-23							治疗	湖北省武汉市江夏区	武汉市江夏区经济开发区大桥新区卫生院		完成疗程
		1017	普通病案	湖北省武汉市洪山区	洪山区疾病预防控制中心	湖北省武汉市洪山区	洪山区疾病预防控制中心	420111016-2013-00548	1017	21	女性	汉族	学生	本县区	420111006		转诊	2013-08-22	2013-09-19	28	阴性	2013-10-23	湖北省武汉市洪山区	洪山区疾病预防控制中心	湖北省武汉市洪山区	洪山区疾病预防控制中心			2013-10-23 08	继发	病原学阴性		吴杰	2013-10-23	新患者	初治		2013-10-23							治疗	湖北省武汉市洪山区	洪山区疾病预防控制中心		完成疗程
		1018	普通病案	湖北省武汉市洪山区	洪山区疾病预防控制中心	湖北省武汉市洪山区	洪山区疾病预防控制中心	420111016-2013-00547	1018	18	男性	汉族	学生	本县区	420111002		转诊	2013-09-16	2013-09-22	6	阴性	2013-10-23	湖北省武汉市洪山区	洪山区疾病预防控制中心	湖北省武汉市洪山区	洪山区疾病预防控制中心			2013-10-23 08	继发	病原学阴性		吴杰	2013-10-23	新患者	初治		2013-10-23							治疗	湖北省武汉市洪山区	洪山区疾病预防控制中心		完成疗程
		1019	普通病案	湖北省武汉市汉阳区	武汉市汉阳区结核病防治所	湖北省武汉市汉阳区	武汉市汉阳区结核病防治所	420105012-2013-00294	1019	15	女性	汉族	学生	本县区	420105005		转诊	2013-10-01	2013-10-06	5	阴性	2013-10-18	湖北省武汉市汉阳区	武汉市汉阳区结核病防治所	湖北省武汉市汉阳区	武汉市汉阳区结核病防治所			2013-10-24 15	继发	病原学阳性		王长武	2013-10-24	新患者	初治	2013-12-18	2013-10-24							治疗	湖北省武汉市汉阳区	汉阳区鹦鹉街社区卫生服务中心		治愈
		1020	普通病案	湖北省武汉市江夏区	武汉市江夏区疾病预防控制中心	湖北省武汉市江夏区	武汉市江夏区疾病预防控制中心	420115008-2013-00436	1020	19	男性	汉族	学生	本县区	420115405		转诊	2013-09-02	2013-10-21	49	阴性	2013-10-23	湖北省武汉市江夏区	武汉市江夏区疾病预防控制中心	湖北省武汉市江夏区	武汉市江夏区疾病预防控制中心			2013-10-24 11	继发	病原学阴性		田晓春	2013-10-24	新患者	初治	2013-12-24	2013-10-24							治疗	湖北省武汉市江夏区	武汉市江夏区经济开发区大桥新区卫生院		完成疗程
		1021	普通病案	湖北省武汉市洪山区	洪山区疾病预防控制中心	湖北省武汉市洪山区	洪山区疾病预防控制中心	420111016-2013-00549	1021	22	男性	汉族	学生	本县区	420111003		转诊	2013-10-15	2013-10-17	2	阴性	2013-10-28	湖北省武汉市洪山区	洪山区疾病预防控制中心	湖北省武汉市洪山区	洪山区疾病预防控制中心			2013-10-28 09	继发	病原学阴性		吴杰	2013-10-28	新患者	初治		2013-10-28							治疗	湖北省武汉市洪山区	湖北工业大学医院		完成疗程
		1022	普通病案	湖北省武汉市洪山区	洪山区疾病预防控制中心	湖北省武汉市洪山区	洪山区疾病预防控制中心	420111016-2013-00552	1022	20	男性	汉族	学生	本县区	420111006		转诊	2013-08-29	2013-09-19	21	阴性	2013-10-28	湖北省武汉市洪山区	洪山区疾病预防控制中心	湖北省武汉市洪山区	洪山区疾病预防控制中心			2013-10-28 09	继发	病原学阴性		吴杰	2013-10-28	新患者	初治		2013-10-28							治疗	湖北省武汉市洪山区	洪山区疾病预防控制中心		完成疗程
		1023	普通病案	湖北省武汉市洪山区	洪山区疾病预防控制中心	湖北省武汉市洪山区	洪山区疾病预防控制中心	420111016-2013-00553	1023	20	男性	汉族	学生	本县区	420111006		转诊	2013-09-12	2013-09-15	3	阴性	2013-10-28	湖北省武汉市洪山区	洪山区疾病预防控制中心	湖北省武汉市洪山区	洪山区疾病预防控制中心			2013-10-28 09	继发	病原学阴性		吴杰	2013-10-28	新患者	初治		2013-10-28							治疗	湖北省武汉市洪山区	洪山区疾病预防控制中心		完成疗程
		1024	普通病案	湖北省武汉市汉阳区	武汉市汉阳区结核病防治所	湖北省武汉市汉阳区	武汉市汉阳区结核病防治所	420105012-2013-00300	1024	15	女性	汉族	学生	本县区	420105009		转诊	2013-10-08	2013-10-11	3	阴性	2013-10-19	湖北省武汉市汉阳区	武汉市汉阳区结核病防治所	湖北省武汉市汉阳区	武汉市汉阳区结核病防治所			2013-10-29 14	继发	病原学阴性		王长武	2013-10-29	新患者	初治	2013-12-19	2013-10-29							治疗	湖北省武汉市汉阳区	武汉市汉阳区二桥街社区卫生服务中心		完成疗程
		1025	普通病案	湖北省武汉市青山区	青山区结核病防治所	湖北省武汉市青山区	青山区结核病防治所	420107018-2013-00197	1025	19	女性	汉族	学生	本县区	420107010		追踪	2013-10-06	2013-10-09	3			湖北省武汉市青山区	青山区结核病防治所	湖北省武汉市青山区	青山区结核病防治所			2013-10-29 14	继发	病原学阴性		郑和平	2013-10-29	新患者	初治		2013-10-29							治疗	湖北省武汉市青山区	青山区冶金街社区卫生服务中心		不良反应
		1026	普通病案	湖北省武汉市硚口区	武汉市结核病防治所	湖北省武汉市硚口区	武汉市结核病防治所	420104019-2013-00459	1026	17	男性	汉族	学生	本县区	420104009		转诊	2013-10-01	2013-10-31	30	阴性	2013-11-01	湖北省武汉市硚口区	武汉市结核病防治所	湖北省武汉市硚口区	武汉市结核病防治所			2013-11-01 09	继发	病原学阴性		赵丽	2013-11-01	新患者	初治		2013-11-01							治疗	湖北省武汉市硚口区	武汉市结核病防治所		完成疗程
		1027	普通病案	湖北省武汉市洪山区	洪山区疾病预防控制中心	湖北省武汉市洪山区	洪山区疾病预防控制中心	420111016-2013-00562	1027	22	男性	汉族	学生	本县区	420111002		转诊	2013-09-28	2013-10-16	18	阴性	2013-11-01	湖北省武汉市洪山区	洪山区疾病预防控制中心	湖北省武汉市洪山区	洪山区疾病预防控制中心			2013-11-01 09	继发	病原学阴性		吴杰	2013-11-01	新患者	初治		2013-11-01							治疗	湖北省武汉市洪山区	中国地质大学医院		完成疗程
		1028	普通病案	湖北省武汉市洪山区	洪山区疾病预防控制中心	湖北省武汉市洪山区	洪山区疾病预防控制中心	420111016-2013-00556	1028	23	男性	汉族	学生	本县区	420111011		转诊	2013-10-26	2013-10-28	2	阴性	2013-11-01	湖北省武汉市洪山区	洪山区疾病预防控制中心	湖北省武汉市洪山区	洪山区疾病预防控制中心			2013-11-01 08	继发	病原学阴性		吴杰	2013-11-01	新患者	初治		2013-11-01							治疗	湖北省武汉市洪山区	武汉市洪山区张家湾街社区卫生中心		完成疗程
		1029	普通病案	湖北省武汉市洪山区	洪山区疾病预防控制中心	湖北省武汉市洪山区	洪山区疾病预防控制中心	420111016-2013-00559	1029	21	女性	汉族	学生	本县区	420111002		转诊	2013-10-12	2013-10-23	11	阴性	2013-11-01	湖北省武汉市洪山区	洪山区疾病预防控制中心	湖北省武汉市洪山区	洪山区疾病预防控制中心			2013-11-01 08	继发	病原学阴性		吴杰	2013-11-01	新患者	初治		2013-11-01							治疗	湖北省武汉市洪山区	洪山区疾病预防控制中心		完成疗程
		1030	普通病案	湖北省武汉市洪山区	洪山区疾病预防控制中心	湖北省武汉市洪山区	洪山区疾病预防控制中心	420111016-2013-00557	1030	21	男性	汉族	学生	本县区	420111001		转诊	2013-10-26	2013-10-28	2	阴性	2013-11-01	湖北省武汉市洪山区	洪山区疾病预防控制中心	湖北省武汉市洪山区	洪山区疾病预防控制中心			2013-11-01 08	继发	病原学阴性		吴杰	2013-11-01	新患者	初治		2013-11-01							治疗	湖北省武汉市洪山区	洪山区珞南街理工大社区卫生服务中心		完成疗程
		1031	普通病案	湖北省武汉市武昌区	武昌区疾病预防控制中心	湖北省武汉市武昌区	武昌区疾病预防控制中心	420106010-2013-00585	1031	17	男性	汉族	学生	本市其它县区	420106002		转诊	2013-09-10	2013-10-25	45	阴性	2013-11-04	湖北省武汉市武昌区	武昌区疾病预防控制中心	湖北省武汉市武昌区	武昌区疾病预防控制中心			2013-11-04 08	继发	病原学阳性		刘文	2013-11-04	新患者	初治		2013-11-04							治疗				治愈
		1032	普通病案	湖北省武汉市硚口区	武汉市结核病防治所	湖北省武汉市硚口区	武汉市结核病防治所	420104019-2013-00460	1032	18	女性	汉族	学生	本县区	420104004		追踪	2013-10-10	2013-11-03	24	阴性	2013-11-04	湖北省武汉市硚口区	武汉市结核病防治所	湖北省武汉市硚口区	武汉市结核病防治所			2013-11-04 08	继发	病原学阴性		姚芳	2013-11-04	新患者	初治		2013-11-04							治疗	湖北省武汉市硚口区	武汉市结核病防治所		完成疗程
		1033	普通病案	湖北省武汉市洪山区	洪山区疾病预防控制中心	湖北省武汉市洪山区	洪山区疾病预防控制中心	420111016-2013-00567	1033	22	男性	汉族	学生	本县区	420111002		转诊	2013-10-24	2013-11-01	8	阴性	2013-11-05	湖北省武汉市洪山区	洪山区疾病预防控制中心	湖北省武汉市洪山区	洪山区疾病预防控制中心			2013-11-05 09	继发	病原学阴性		吴杰	2013-11-05	新患者	初治		2013-11-05							治疗	湖北省武汉市洪山区	洪山区疾病预防控制中心		完成疗程
		1034	普通病案	湖北省武汉市洪山区	洪山区疾病预防控制中心	湖北省武汉市洪山区	洪山区疾病预防控制中心	420111016-2013-00564	1034	24	女性	汉族	学生	本县区	420111001		转诊	2013-09-30	2013-10-31	31	阴性	2013-11-05	湖北省武汉市洪山区	洪山区疾病预防控制中心	湖北省武汉市洪山区	洪山区疾病预防控制中心			2013-11-05 08	继发	病原学阳性		吴杰	2013-11-05	新患者	初治		2013-11-05							治疗	湖北省武汉市洪山区	洪山区珞南街华中师范大学医院		治愈
		1035	普通病案	湖北省武汉市洪山区	洪山区疾病预防控制中心	湖北省武汉市洪山区	洪山区疾病预防控制中心	420111016-2013-00566	1035	24	女性	汉族	学生	本县区	420111003		转诊	2013-10-22	2013-11-01	10	阴性	2013-11-05	湖北省武汉市洪山区	洪山区疾病预防控制中心	湖北省武汉市洪山区	洪山区疾病预防控制中心			2013-11-05 09	继发	病原学阴性		吴杰	2013-11-05	新患者	初治		2013-11-05							治疗	湖北省武汉市洪山区	洪山区狮子山街华中农业大学医院		完成疗程
		1036	普通病案	湖北省武汉市洪山区	洪山区疾病预防控制中心	湖北省武汉市洪山区	洪山区疾病预防控制中心	420111016-2013-00570	1036	16	男性	汉族	学生	本县区	420111002		转诊	2013-07-16	2013-11-04	111	阴性	2013-11-05	湖北省武汉市洪山区	洪山区疾病预防控制中心	湖北省武汉市洪山区	洪山区疾病预防控制中心			2013-11-05 09	继发	病原学阴性		吴杰	2013-11-05	新患者	初治		2013-11-05							治疗	湖北省武汉市洪山区	武汉市第三医院光谷院区		完成疗程
		1037	普通病案	湖北省武汉市江夏区	武汉市江夏区疾病预防控制中心	湖北省武汉市江夏区	武汉市江夏区疾病预防控制中心	420115008-2013-00453	1037	22	男性	汉族	学生	本县区	420115405		转诊	2013-10-06	2013-10-13	7	阴性	2013-11-01	湖北省武汉市江夏区	武汉市江夏区疾病预防控制中心	湖北省武汉市江夏区	武汉市江夏区疾病预防控制中心			2013-11-06 15	继发	病原学阴性		田晓春	2013-11-06	新患者	初治		2013-11-06							治疗	湖北省武汉市江夏区	武汉市江夏区经济开发区大桥新区卫生院		完成疗程
		1038	普通病案	湖北省武汉市蔡甸区	武汉市蔡甸区疾病预防控制中心	湖北省武汉市蔡甸区	武汉市蔡甸区疾病预防控制中心	420114003-2013-00370	1038	17	男性	汉族	学生	本市其它县区	420114002		追踪	2013-10-21	2013-11-11	21			湖北省武汉市蔡甸区	武汉市蔡甸区疾病预防控制中心	湖北省武汉市蔡甸区	武汉市蔡甸区疾病预防控制中心			2013-11-11 16	继发	病原学阳性		刘晓燕	2013-11-11	新患者	初治		2013-11-11							治疗	湖北省武汉市蔡甸区	武汉市蔡甸区奓山街卫生院		治愈
		1039	普通病案	湖北省武汉市洪山区	洪山区疾病预防控制中心	湖北省武汉市洪山区	洪山区疾病预防控制中心	420111016-2013-00578	1039	17	男性	汉族	学生	本县区	420111006		转诊	2013-11-06	2013-11-07	1	阴性	2013-11-11	湖北省武汉市洪山区	洪山区疾病预防控制中心	湖北省武汉市洪山区	洪山区疾病预防控制中心			2013-11-11 08	继发	病原学阴性		吴杰	2013-11-11	新患者	初治		2013-11-11							治疗	湖北省武汉市洪山区	洪山区疾病预防控制中心		完成疗程
		1040	普通病案	湖北省武汉市洪山区	洪山区疾病预防控制中心	湖北省武汉市洪山区	洪山区疾病预防控制中心	420111016-2013-00582	1040	20	男性	汉族	学生	本县区	420111003		转诊	2013-10-14	2013-10-16	2	阴性	2013-11-12	湖北省武汉市洪山区	洪山区疾病预防控制中心	湖北省武汉市洪山区	洪山区疾病预防控制中心			2013-11-12 08	继发	病原学阴性		吴杰	2013-11-12	新患者	初治		2013-11-12							治疗	湖北省武汉市洪山区	湖北工业大学医院		完成疗程
		1041	普通病案	湖北省武汉市洪山区	洪山区疾病预防控制中心	湖北省武汉市洪山区	洪山区疾病预防控制中心	420111016-2013-00586	1041	21	男性	汉族	学生	本县区	420111001		转诊	2013-10-20	2013-11-10	21	阴性	2013-11-12	湖北省武汉市洪山区	洪山区疾病预防控制中心	湖北省武汉市洪山区	洪山区疾病预防控制中心			2013-11-12 08	继发	病原学阴性		吴杰	2013-11-12	新患者	初治		2013-11-12							治疗	湖北省武汉市洪山区	洪山区珞南街华中师范大学医院		完成疗程
		1042	普通病案	湖北省武汉市东西湖区	东西湖区结核病防治所	湖北省武汉市东西湖区	东西湖区结核病防治所	420112019-2013-00213	1042	18	男性	汉族	学生	本县区	420112400		追踪	2013-10-04	2013-10-07	3	阴性	2013-11-14	湖北省武汉市东西湖区	东西湖区结核病防治所	湖北省武汉市东西湖区	东西湖区结核病防治所			2013-11-14 09	继发	病原学阴性		孟刚	2013-11-14	新患者	初治		2013-11-14							治疗	湖北省武汉市东西湖区	常青花园社区卫生服务中心		完成疗程
		1043	普通病案	湖北省武汉市武昌区	武昌区疾病预防控制中心	湖北省武汉市武昌区	武昌区疾病预防控制中心	420106010-2013-00606	1043	16	男性	汉族	学生	本县区	420106013		直接就诊	2013-11-07	2013-11-15	8	阴性	2013-11-15	湖北省武汉市武昌区	武昌区疾病预防控制中心	湖北省武汉市武昌区	武昌区疾病预防控制中心			2013-11-15 14	继发	病原学阳性		刘文	2013-11-15	新患者	初治		2013-11-15							治疗				治愈
		1044	普通病案	湖北省武汉市江夏区	武汉市江夏区疾病预防控制中心	湖北省武汉市江夏区	武汉市江夏区疾病预防控制中心	420115008-2013-00466	1044	16	男性	汉族	学生	本县区	420115005		转诊	2013-10-05	2013-11-01	27	阴性	2013-11-12	湖北省武汉市江夏区	武汉市江夏区疾病预防控制中心	湖北省武汉市江夏区	武汉市江夏区疾病预防控制中心			2013-11-15 09	继发	病原学阳性		田晓春	2013-11-15	新患者	初治		2013-11-15							治疗	湖北省武汉市江夏区	武汉市江夏区郑店社区卫生服务中心		治愈
		1045	普通病案	湖北省武汉市江岸区	江岸区疾病预防控制中心	湖北省武汉市江岸区	江岸区疾病预防控制中心	420102000-2013-00440	1045	16	男性	汉族	学生	本市其它县区	420102017		转诊	2013-11-05	2013-11-07	2	阴性	2013-11-07	湖北省武汉市江岸区	江岸区疾病预防控制中心	湖北省武汉市江岸区	江岸区疾病预防控制中心			2013-11-18 16	继发	病原学阳性		陈国喜	2013-11-18	新患者	初治		2013-11-18							治疗	湖北省武汉市江岸区	江岸区后湖街金桥社区卫生服务中心		治愈
		1046	普通病案	湖北省武汉市江夏区	武汉市江夏区疾病预防控制中心	湖北省武汉市江夏区	武汉市江夏区疾病预防控制中心	420115008-2013-00469	1046	20	男性	汉族	学生	本县区	420115001		转诊	2013-10-29	2013-11-15	17	阴性	2013-11-14	湖北省武汉市江夏区	武汉市江夏区疾病预防控制中心	湖北省武汉市江夏区	武汉市江夏区疾病预防控制中心			2013-11-18 08	继发	病原学阳性		田晓春	2013-11-18	新患者	初治		2013-11-18							治疗	湖北省武汉市江夏区	武汉市江夏区经济开发区大桥新区卫生院		治愈
		1047	普通病案	湖北省武汉市硚口区	武汉市结核病防治所	湖北省武汉市硚口区	武汉市结核病防治所	420104019-2013-00483	1047	24	女性	汉族	学生	本县区	420104003		转诊	2013-11-02	2013-11-18	16	阴性	2013-11-19	湖北省武汉市硚口区	武汉市结核病防治所	湖北省武汉市硚口区	武汉市结核病防治所			2013-11-19 08	继发	病原学阴性		刘妍丽	2013-11-19	新患者	初治		2013-11-19							治疗	湖北省武汉市硚口区	武汉市结核病防治所		完成疗程
		1048	普通病案	湖北省武汉市洪山区	洪山区疾病预防控制中心	湖北省武汉市洪山区	洪山区疾病预防控制中心	420111016-2013-00590	1048	18	男性	汉族	学生	本县区	420111001		转诊	2013-11-12	2013-11-14	2	阴性	2013-11-19	湖北省武汉市洪山区	洪山区疾病预防控制中心	湖北省武汉市洪山区	洪山区疾病预防控制中心			2013-11-19 08	继发	病原学阴性		吴杰	2013-11-19	新患者	初治		2013-11-19							治疗	湖北省武汉市洪山区	武汉市洪山区中医医院		完成疗程
		1049	普通病案	湖北省武汉市汉南区	武汉市汉南区疾病预防控制中心	湖北省武汉市汉南区	武汉市汉南区疾病预防控制中心	420113006-2013-02053	1049	20	男性	汉族	学生	本县区	420113096		转诊	2013-08-21	2013-11-19	90	阴性	2013-09-18	湖北省武汉市汉南区	武汉市汉南区疾病预防控制中心	湖北省武汉市汉南区	武汉市汉南区疾病预防控制中心			2013-11-19 10	继发	病原学阴性		聂绪军	2013-11-19	新患者	初治	2013-11-19	2013-11-19							治疗				完成疗程
		1050	普通病案	湖北省武汉市洪山区	洪山区疾病预防控制中心	湖北省武汉市洪山区	洪山区疾病预防控制中心	420111016-2013-00592	1050	20	男性	汉族	学生	本县区	420111002		转诊	2013-11-14	2013-11-17	3	阴性	2013-11-19	湖北省武汉市洪山区	洪山区疾病预防控制中心	湖北省武汉市洪山区	洪山区疾病预防控制中心			2013-11-19 08	继发	病原学阴性		吴杰	2013-11-19	新患者	初治		2013-11-19							治疗	湖北省武汉市洪山区	洪山区疾病预防控制中心		完成疗程
		1051	普通病案	湖北省武汉市江夏区	武汉市江夏区疾病预防控制中心	湖北省武汉市江夏区	武汉市江夏区疾病预防控制中心	420115008-2013-00477	1051	18	女性	汉族	学生	本县区	420115405		追踪	2013-11-12	2013-11-15	3	阴性	2013-11-14	湖北省武汉市江夏区	武汉市江夏区疾病预防控制中心	湖北省武汉市江夏区	武汉市江夏区疾病预防控制中心			2013-11-20 15	继发	病原学阴性		田晓春	2013-11-20	新患者	初治		2013-11-20							治疗	湖北省武汉市江夏区	武汉市江夏区经济开发区大桥新区卫生院		完成疗程
		1052	普通病案	湖北省武汉市东西湖区	东西湖区结核病防治所	湖北省武汉市东西湖区	东西湖区结核病防治所	420112019-2013-00221	1052	23	男性	汉族	学生	本县区	420112400		转诊	2013-11-02	2013-11-18	16			湖北省武汉市东西湖区	东西湖区结核病防治所	湖北省武汉市东西湖区	东西湖区结核病防治所			2013-11-20 16	继发	病原学阴性		孟刚	2013-11-20	新患者	初治		2013-11-20							治疗	湖北省武汉市东西湖区	常青花园社区卫生服务中心		完成疗程
		1053	普通病案	湖北省武汉市江夏区	武汉市江夏区疾病预防控制中心	湖北省武汉市江夏区	武汉市江夏区疾病预防控制中心	420115008-2013-00486	1053	20	男性	汉族	学生	本县区	420115405		追踪	2013-11-10	2013-11-15	5	阴性	2013-10-16	湖北省武汉市江夏区	武汉市江夏区疾病预防控制中心	湖北省武汉市江夏区	武汉市江夏区疾病预防控制中心			2013-11-22 16	继发	病原学阴性		田晓春	2013-11-22	新患者	初治		2013-11-22							治疗	湖北省武汉市江夏区	武汉市江夏区经济开发区大桥新区卫生院		完成疗程
		1054	普通病案	湖北省武汉市硚口区	武汉市结核病防治所	湖北省武汉市硚口区	武汉市结核病防治所	420104019-2013-00492	1054	20	女性	汉族	学生	本县区	420104005		转诊	2013-11-12	2013-11-25	13	阴性	2013-11-26	湖北省武汉市硚口区	武汉市结核病防治所	湖北省武汉市硚口区	武汉市结核病防治所			2013-11-26 16	继发	病原学阴性		王娅	2013-11-26	新患者	初治		2013-11-26							治疗	湖北省武汉市硚口区	武汉市结核病防治所		完成疗程
		1055	普通病案	湖北省武汉市武昌区	武昌区疾病预防控制中心	湖北省武汉市武昌区	武昌区疾病预防控制中心	420106010-2013-00629	1055	22	男性	汉族	学生	本市其它县区	420106013		转诊	2013-11-20	2013-11-26	6	阴性	2013-11-29	湖北省武汉市武昌区	武昌区疾病预防控制中心	湖北省武汉市武昌区	武昌区疾病预防控制中心			2013-11-29 14	继发	病原学阳性		刘文	2013-11-29	新患者	初治		2013-11-29							治疗				治愈
		1056	普通病案	湖北省武汉市武昌区	武昌区疾病预防控制中心	湖北省武汉市武昌区	武昌区疾病预防控制中心	420106010-2013-00625	1056	20	男性	汉族	学生	本县区	420106013		转诊	2013-11-25	2013-11-26	1	阴性	2013-11-29	湖北省武汉市武昌区	武昌区疾病预防控制中心	湖北省武汉市武昌区	武昌区疾病预防控制中心			2013-11-29 09	继发	病原学阳性		刘文	2013-11-29	新患者	初治		2013-11-29							治疗				治愈
		1057	普通病案	湖北省武汉市汉阳区	武汉市汉阳区结核病防治所	湖北省武汉市汉阳区	武汉市汉阳区结核病防治所	420105012-2013-00322	1057	16	女性	汉族	学生	本县区	420105009		健康体检	2013-10-21	2013-11-01	11	阴性	2013-11-29	湖北省武汉市汉阳区	武汉市汉阳区结核病防治所	湖北省武汉市汉阳区	武汉市汉阳区结核病防治所			2013-12-02 10	继发	病原学阴性		王长武	2013-12-02	新患者	初治		2013-12-02							治疗	湖北省武汉市汉阳区	武汉市汉阳区二桥街社区卫生服务中心		完成疗程
		1058	普通病案	湖北省武汉市江汉区	武汉市江汉区疾病预防控制中心	湖北省武汉市江汉区	武汉市江汉区疾病预防控制中心	420103013-2013-00390	1058	16	女性	汉族	学生	本县区	420103011		转诊	2013-11-20	2013-11-20	0	阴性	2013-11-29	湖北省武汉市江汉区	武汉市江汉区疾病预防控制中心	湖北省武汉市江汉区	武汉市江汉区疾病预防控制中心			2013-12-03 08	继发	病原学阴性		王郡	2013-12-03	新患者	初治		2013-12-03							治疗	湖北省武汉市江汉区	江汉区前进街社区卫生服务中心		完成疗程
		1059	普通病案	湖北省武汉市江夏区	武汉市江夏区疾病预防控制中心	湖北省武汉市江夏区	武汉市江夏区疾病预防控制中心	420115008-2013-00507	1059	20	女性	汉族	学生	本县区	420115010		转诊	2013-09-09	2013-11-09	61	阴性	2013-11-15	湖北省武汉市江夏区	武汉市江夏区疾病预防控制中心	湖北省武汉市江夏区	武汉市江夏区疾病预防控制中心			2013-12-03 10	继发	病原学阳性		田晓春	2013-12-03	新患者	初治		2013-12-03							治疗	湖北省武汉市江夏区	武汉市江夏区五里界社区卫生服务中心		治愈
		1060	普通病案	湖北省武汉市东湖高新技术开发区	武汉东湖新技术开发区佛祖岭社区卫生服务中心	湖北省武汉市东湖高新技术开发区	武汉东湖新技术开发区佛祖岭社区卫生服务中心	420192011-2013-01127	1060	19	男性	汉族	学生	本省其它地市	420192002		追踪	2013-11-08	2013-12-04	26			湖北省武汉市东湖高新技术开发区	武汉东湖新技术开发区佛祖岭社区卫生服务中心	湖北省武汉市东湖高新技术开发区	武汉东湖新技术开发区佛祖岭社区卫生服务中心			2013-12-04 08	继发	病原学阴性		邱宏	2013-12-04	新患者	初治		2013-12-04							治疗	湖北省武汉市东湖高新技术开发区	武汉东湖新技术开发区佛祖岭社区卫生服务中心		完成疗程
		1061	普通病案	湖北省武汉市洪山区	洪山区疾病预防控制中心	湖北省武汉市洪山区	洪山区疾病预防控制中心	420111016-2013-00610	1061	19	男性	汉族	学生	本县区	420111011		转诊	2013-11-30	2013-12-03	3	阴性	2013-12-04	湖北省武汉市洪山区	洪山区疾病预防控制中心	湖北省武汉市洪山区	洪山区疾病预防控制中心			2013-12-04 09	继发	病原学阴性		吴杰	2013-12-04	新患者	初治		2013-12-04							治疗	湖北省武汉市洪山区	武汉市洪山区张家湾街社区卫生中心		完成疗程
		1062	普通病案	湖北省武汉市洪山区	洪山区疾病预防控制中心	湖北省武汉市洪山区	洪山区疾病预防控制中心	420111016-2013-00607	1062	22	男性	汉族	学生	本县区	420111002		转诊	2013-11-27	2013-11-29	2	阴性	2013-12-04	湖北省武汉市洪山区	洪山区疾病预防控制中心	湖北省武汉市洪山区	洪山区疾病预防控制中心			2013-12-04 09	继发	病原学阴性		吴杰	2013-12-04	新患者	初治		2013-12-04							治疗	湖北省武汉市洪山区	洪山区关山街华中科技大学医院		完成疗程
		1063	普通病案	湖北省武汉市洪山区	洪山区疾病预防控制中心	湖北省武汉市洪山区	洪山区疾病预防控制中心	420111016-2013-00608	1063	20	女性	汉族	学生	本县区	420111002		转诊	2013-11-28	2013-12-01	3	阴性	2013-12-04	湖北省武汉市洪山区	洪山区疾病预防控制中心	湖北省武汉市洪山区	洪山区疾病预防控制中心			2013-12-04 09	继发	病原学阴性		吴杰	2013-12-04	新患者	初治		2013-12-04							治疗	湖北省武汉市洪山区	中国地质大学医院		完成疗程
		1064	普通病案	湖北省武汉市洪山区	洪山区疾病预防控制中心	湖北省武汉市洪山区	洪山区疾病预防控制中心	420111016-2013-00606	1064	20	男性	汉族	学生	本县区	420111002		转诊	2013-11-24	2013-11-30	6	阴性	2013-12-04	湖北省武汉市洪山区	洪山区疾病预防控制中心	湖北省武汉市洪山区	洪山区疾病预防控制中心			2013-12-04 09	继发	病原学阴性		吴杰	2013-12-04	新患者	初治		2013-12-04							治疗	湖北省武汉市洪山区	洪山区珞南街理工大社区卫生服务中心		完成疗程
		1065	普通病案	湖北省武汉市洪山区	洪山区疾病预防控制中心	湖北省武汉市洪山区	洪山区疾病预防控制中心	420111016-2013-00609	1065	19	男性	汉族	学生	本县区	420111003		转诊	2013-11-30	2013-12-02	2	阴性	2013-12-04	湖北省武汉市洪山区	洪山区疾病预防控制中心	湖北省武汉市洪山区	洪山区疾病预防控制中心			2013-12-04 09	继发	病原学阴性		吴杰	2013-12-04	新患者	初治		2013-12-04							治疗	湖北省武汉市洪山区	洪山区狮子山街华中农业大学医院		完成疗程
		1066	普通病案	湖北省武汉市洪山区	洪山区疾病预防控制中心	湖北省武汉市洪山区	洪山区疾病预防控制中心	420111016-2013-00611	1066	13	女性	汉族	学生	本县区	420111001		转诊	2013-11-05	2013-11-27	22	阴性	2013-12-05	湖北省武汉市洪山区	洪山区疾病预防控制中心	湖北省武汉市洪山区	洪山区疾病预防控制中心			2013-12-05 09	继发	病原学阴性		吴杰	2013-12-05	新患者	初治		2013-12-05							治疗	湖北省武汉市洪山区	武汉市洪山区中医医院		完成疗程
		1067	普通病案	湖北省武汉市洪山区	洪山区疾病预防控制中心	湖北省武汉市洪山区	洪山区疾病预防控制中心	420111016-2013-00614	1067	23	男性	汉族	学生	本县区	420111002		转诊	2013-10-01	2013-12-03	63	阴性	2013-12-05	湖北省武汉市洪山区	洪山区疾病预防控制中心	湖北省武汉市洪山区	洪山区疾病预防控制中心			2013-12-05 09	继发	病原学阳性		吴杰	2013-12-05	新患者	初治		2013-12-05							治疗	湖北省武汉市洪山区	中国地质大学医院		治愈
		1068	普通病案	湖北省武汉市洪山区	洪山区疾病预防控制中心	湖北省武汉市洪山区	洪山区疾病预防控制中心	420111016-2013-00615	1068	20	女性	汉族	学生	本县区	420111002		转诊	2013-11-30	2013-12-03	3	阴性	2013-12-05	湖北省武汉市洪山区	洪山区疾病预防控制中心	湖北省武汉市洪山区	洪山区疾病预防控制中心			2013-12-05 09	继发	病原学阴性		吴杰	2013-12-05	新患者	初治		2013-12-05							治疗	湖北省武汉市洪山区	洪山区疾病预防控制中心		完成疗程
		1069	普通病案	湖北省武汉市洪山区	洪山区疾病预防控制中心	湖北省武汉市洪山区	洪山区疾病预防控制中心	420111016-2013-00612	1069	23	男性	汉族	学生	本县区	420111002		转诊	2013-11-07	2013-12-03	26	阴性	2013-12-05	湖北省武汉市洪山区	洪山区疾病预防控制中心	湖北省武汉市洪山区	洪山区疾病预防控制中心			2013-12-05 10	继发	病原学阳性		吴杰	2013-12-05	新患者	初治		2013-12-05							治疗	湖北省武汉市洪山区	洪山区疾病预防控制中心		治愈
		1070	普通病案	湖北省武汉市洪山区	洪山区疾病预防控制中心	湖北省武汉市洪山区	洪山区疾病预防控制中心	420111016-2013-00613	1070	26	女性	汉族	学生	本县区	420111003		转诊	2013-11-26	2013-12-03	7	阴性	2013-12-05	湖北省武汉市洪山区	洪山区疾病预防控制中心	湖北省武汉市洪山区	洪山区疾病预防控制中心			2013-12-05 09	继发	病原学阴性		吴杰	2013-12-05	新患者	初治		2013-12-05							治疗	湖北省武汉市洪山区	洪山区狮子山街华中农业大学医院		完成疗程
		1071	普通病案	湖北省武汉市洪山区	洪山区疾病预防控制中心	湖北省武汉市洪山区	洪山区疾病预防控制中心	420111016-2013-00616	1071	21	女性	汉族	学生	本县区	420111002		转诊	2013-11-01	2013-12-03	32	阴性	2013-12-05	湖北省武汉市洪山区	洪山区疾病预防控制中心	湖北省武汉市洪山区	洪山区疾病预防控制中心			2013-12-05 09	继发	病原学阴性		吴杰	2013-12-05	新患者	初治		2013-12-05							治疗	湖北省武汉市洪山区	中国地质大学医院		完成疗程
		1072	普通病案	湖北省武汉市新洲区	新洲区疾病预防控制中心	湖北省武汉市新洲区	新洲区疾病预防控制中心	420117002-2013-00709	1072	18	男性	汉族	学生	本县区	420117002		追踪	2013-11-06	2013-12-06	30			湖北省武汉市新洲区	新洲区疾病预防控制中心	湖北省武汉市新洲区	新洲区疾病预防控制中心			2013-12-06 10	继发	病原学阴性		邓其军	2013-12-06	新患者	初治		2013-12-06							治疗	湖北省武汉市新洲区	新洲区阳逻街卫生院		完成疗程
		1073	普通病案	湖北省武汉市洪山区	洪山区疾病预防控制中心	湖北省武汉市洪山区	洪山区疾病预防控制中心	420111016-2013-00621	1073	14	男性	汉族	学生	本县区	420111006		转诊	2013-11-17	2013-12-05	18	阴性	2013-12-09	湖北省武汉市洪山区	洪山区疾病预防控制中心	湖北省武汉市洪山区	洪山区疾病预防控制中心			2013-12-09 08	继发	病原学阴性		吴杰	2013-12-09	新患者	初治		2013-12-09							治疗	湖北省武汉市洪山区	洪山区疾病预防控制中心		完成疗程
		1074	普通病案	湖北省武汉市洪山区	洪山区疾病预防控制中心	湖北省武汉市洪山区	洪山区疾病预防控制中心	420111016-2013-00622	1074	24	男性	汉族	学生	本县区	420111002		转诊	2013-12-02	2013-12-05	3	阴性	2013-12-09	湖北省武汉市洪山区	洪山区疾病预防控制中心	湖北省武汉市洪山区	洪山区疾病预防控制中心			2013-12-09 10	继发	病原学阴性		吴杰	2013-12-09	新患者	初治		2013-12-09							治疗	湖北省武汉市洪山区	洪山区关山街华中科技大学医院		完成疗程
		1075	普通病案	湖北省武汉市武昌区	武昌区疾病预防控制中心	湖北省武汉市武昌区	武昌区疾病预防控制中心	420106010-2013-00638	1075	22	男性	汉族	学生	本县区	420106005		转诊	2013-11-30	2013-12-03	3	阴性	2013-12-10	湖北省武汉市武昌区	武昌区疾病预防控制中心	湖北省武汉市武昌区	武昌区疾病预防控制中心			2013-12-10 09	继发	病原学阳性		刘文	2013-12-10	新患者	初治		2013-12-10							治疗				治愈
		1076	普通病案	湖北省武汉市汉南区	武汉市汉南区疾病预防控制中心	湖北省武汉市汉南区	武汉市汉南区疾病预防控制中心	420113006-2013-02056	1076	19	男性	汉族	学生	本县区	420113096		追踪	2013-11-03	2013-11-13	10	阴性	2013-11-15	湖北省武汉市汉南区	武汉市汉南区疾病预防控制中心	湖北省武汉市汉南区	武汉市汉南区疾病预防控制中心			2013-12-10 08	继发	病原学阴性		聂绪军	2013-12-10	新患者	初治	2014-01-15	2013-12-10							治疗	湖北省武汉市汉南区	武汉市汉南区疾病预防控制中心		完成疗程
		1077	普通病案	湖北省武汉市洪山区	洪山区疾病预防控制中心	湖北省武汉市洪山区	洪山区疾病预防控制中心	420111016-2013-00627	1077	22	女性	汉族	学生	本县区	420111002		转诊	2013-12-06	2013-12-09	3	阴性	2013-12-11	湖北省武汉市洪山区	洪山区疾病预防控制中心	湖北省武汉市洪山区	洪山区疾病预防控制中心			2013-12-11 08	继发	病原学阴性		吴杰	2013-12-11	新患者	初治		2013-12-11							治疗	湖北省武汉市洪山区	洪山区疾病预防控制中心		完成疗程
		1078	普通病案	湖北省武汉市洪山区	洪山区疾病预防控制中心	湖北省武汉市洪山区	洪山区疾病预防控制中心	420111016-2013-00628	1078	22	女性	汉族	学生	本县区	420111002		转诊	2013-12-05	2013-12-09	4	阴性	2013-12-11	湖北省武汉市洪山区	洪山区疾病预防控制中心	湖北省武汉市洪山区	洪山区疾病预防控制中心			2013-12-11 09	继发	病原学阴性		吴杰	2013-12-11	新患者	初治		2013-12-11							治疗	湖北省武汉市洪山区	洪山区疾病预防控制中心		完成疗程
		1079	普通病案	湖北省武汉市洪山区	洪山区疾病预防控制中心	湖北省武汉市洪山区	洪山区疾病预防控制中心	420111016-2013-00624	1079	22	男性	汉族	学生	本县区	420111002		转诊	2013-12-07	2013-12-08	1	阴性	2013-12-11	湖北省武汉市洪山区	洪山区疾病预防控制中心	湖北省武汉市洪山区	洪山区疾病预防控制中心			2013-12-11 08	继发	病原学阴性		吴杰	2013-12-11	新患者	初治		2013-12-11							治疗	湖北省武汉市洪山区	洪山区关山街华中科技大学医院		完成疗程
		1080	普通病案	湖北省武汉市蔡甸区	武汉市蔡甸区疾病预防控制中心	湖北省武汉市蔡甸区	武汉市蔡甸区疾病预防控制中心	420114003-2013-00417	1080	19	男性	汉族	学生	本市其它县区	420114001		追踪	2013-12-06	2013-12-16	10	阴性	2013-12-16	湖北省武汉市蔡甸区	武汉市蔡甸区疾病预防控制中心	湖北省武汉市蔡甸区	武汉市蔡甸区疾病预防控制中心			2013-12-16 16	继发	病原学阴性		刘晓燕	2013-12-16	新患者	初治		2013-12-16							治疗	湖北省武汉市蔡甸区	武汉市蔡甸区蔡甸街卫生院		完成疗程
		1081	普通病案	湖北省武汉市蔡甸区	武汉市蔡甸区疾病预防控制中心	湖北省武汉市蔡甸区	武汉市蔡甸区疾病预防控制中心	420114003-2013-00408	1081	18	男性	汉族	学生	本县区	420114200		直接就诊	2013-11-26	2013-12-16	20			湖北省武汉市蔡甸区	武汉市蔡甸区疾病预防控制中心	湖北省武汉市蔡甸区	武汉市蔡甸区疾病预防控制中心			2013-12-16 16	继发	病原学阴性		刘晓燕	2013-12-16	新患者	初治		2013-12-16							治疗	湖北省武汉市蔡甸区	武汉市蔡甸区消泗乡卫生院		完成疗程
		1082	普通病案	湖北省武汉市洪山区	洪山区疾病预防控制中心	湖北省武汉市洪山区	洪山区疾病预防控制中心	420111016-2013-00631	1082	20	女性	汉族	学生	本县区	420111002		转诊	2013-12-09	2013-12-13	4	阴性	2013-12-16	湖北省武汉市洪山区	洪山区疾病预防控制中心	湖北省武汉市洪山区	洪山区疾病预防控制中心			2013-12-16 09	继发	病原学阴性		吴杰	2013-12-16	新患者	初治		2013-12-16							治疗	湖北省武汉市洪山区	洪山区疾病预防控制中心		完成疗程
		1083	普通病案	湖北省武汉市洪山区	洪山区疾病预防控制中心	湖北省武汉市洪山区	洪山区疾病预防控制中心	420111016-2013-00632	1083	18	男性	汉族	学生	本县区	420111004		转诊	2013-12-01	2013-12-13	12	阴性	2013-12-16	湖北省武汉市洪山区	洪山区疾病预防控制中心	湖北省武汉市洪山区	洪山区疾病预防控制中心			2013-12-16 08	继发	病原学阳性		吴杰	2013-12-16	新患者	初治		2013-12-16							治疗	湖北省武汉市洪山区	武汉市洪山区张家湾街社区卫生中心		治愈
		1084	普通病案	湖北省武汉市洪山区	洪山区疾病预防控制中心	湖北省武汉市洪山区	洪山区疾病预防控制中心	420111016-2013-00634	1084	23	女性	汉族	学生	本县区	420111006		转诊	2013-11-30	2013-12-15	15	阴性	2013-12-17	湖北省武汉市洪山区	洪山区疾病预防控制中心	湖北省武汉市洪山区	洪山区疾病预防控制中心			2013-12-17 09	继发	病原学阴性		吴杰	2013-12-17	新患者	初治		2013-12-17							治疗	湖北省武汉市洪山区	洪山区疾病预防控制中心		完成疗程
		1085	普通病案	湖北省武汉市洪山区	洪山区疾病预防控制中心	湖北省武汉市洪山区	洪山区疾病预防控制中心	420111016-2013-00637	1085	19	女性	汉族	学生	本县区	420111002		转诊	2013-10-13	2013-12-16	64	阴性	2013-12-18	湖北省武汉市洪山区	洪山区疾病预防控制中心	湖北省武汉市洪山区	洪山区疾病预防控制中心			2013-12-18 09	继发	病原学阴性		吴杰	2013-12-18	新患者	初治		2013-12-18							治疗	湖北省武汉市洪山区	中国地质大学医院		完成疗程
		1086	普通病案	湖北省武汉市硚口区	武汉市结核病防治所	湖北省武汉市硚口区	武汉市结核病防治所	420104019-2013-00521	1086	15	男性	汉族	学生	本县区	420104006		转诊	2013-12-15	2013-12-18	3	阴性	2013-12-19	湖北省武汉市硚口区	武汉市结核病防治所	湖北省武汉市硚口区	武汉市结核病防治所			2013-12-19 10	继发	病原学阴性		王娅	2013-12-19	新患者	初治		2013-12-19							治疗	湖北省武汉市硚口区	武汉市结核病防治所		完成疗程
		1087	普通病案	湖北省武汉市东湖高新技术开发区	武汉东湖新技术开发区佛祖岭社区卫生服务中心	湖北省武汉市东湖高新技术开发区	武汉东湖新技术开发区佛祖岭社区卫生服务中心	420192011-2013-01131	1087	18	女性	汉族	学生	本市其它县区	420192002		追踪	2013-10-20	2013-12-20	61			湖北省武汉市东湖高新技术开发区	武汉东湖新技术开发区佛祖岭社区卫生服务中心	湖北省武汉市东湖高新技术开发区	武汉东湖新技术开发区佛祖岭社区卫生服务中心			2013-12-20 08	继发	病原学阳性		邱宏	2013-12-20	新患者	初治		2013-12-20							治疗	湖北省武汉市东湖高新技术开发区	武汉东湖新技术开发区佛祖岭社区卫生服务中心		治愈
		1088	普通病案	湖北省武汉市东湖高新技术开发区	武汉东湖新技术开发区佛祖岭社区卫生服务中心	湖北省武汉市东湖高新技术开发区	武汉东湖新技术开发区佛祖岭社区卫生服务中心	420192011-2013-01133	1088	18	男性	汉族	学生	本市其它县区	420192002		追踪	2013-11-06	2013-12-23	47	阴性	2013-10-30	湖北省武汉市东湖高新技术开发区	武汉东湖新技术开发区佛祖岭社区卫生服务中心	湖北省武汉市东湖高新技术开发区	武汉东湖新技术开发区佛祖岭社区卫生服务中心			2013-12-23 09	继发	病原学阴性		邱宏	2013-12-23	新患者	初治		2013-12-23							治疗	湖北省武汉市东湖高新技术开发区	武汉东湖新技术开发区佛祖岭社区卫生服务中心		完成疗程
		1089	普通病案	湖北省武汉市武昌区	武昌区疾病预防控制中心	湖北省武汉市武昌区	武昌区疾病预防控制中心	420106010-2013-00656	1089	16	男性	汉族	学生	本县区	420106005		直接就诊	2013-12-16	2013-12-23	7	阴性	2013-12-23	湖北省武汉市武昌区	武昌区疾病预防控制中心	湖北省武汉市武昌区	武昌区疾病预防控制中心			2013-12-23 14	继发	病原学阴性		刘文	2013-12-23	新患者	初治		2013-12-23							治疗				完成疗程
		1090	普通病案	湖北省武汉市汉阳区	武汉市汉阳区结核病防治所	湖北省武汉市汉阳区	武汉市汉阳区结核病防治所	420105012-2013-00339	1090	21	男性	汉族	学生	本县区	420105004		追踪	2013-12-06	2013-12-09	3	阴性	2013-12-06	湖北省武汉市汉阳区	武汉市汉阳区结核病防治所	湖北省武汉市汉阳区	武汉市汉阳区结核病防治所			2013-12-23 10	继发	病原学阴性		王长武	2013-12-23	新患者	初治	2014-02-06	2013-12-23							治疗	湖北省武汉市汉阳区	汉阳区晴川街社区卫生服务中心		完成疗程
		1091	普通病案	湖北省武汉市新洲区	新洲区疾病预防控制中心	湖北省武汉市新洲区	新洲区疾病预防控制中心	420117002-2013-00729	1091	19	男性	汉族	学生	本县区	420117002		转诊	2013-12-05	2013-12-24	19	阴性	2013-12-24	湖北省武汉市新洲区	新洲区疾病预防控制中心	湖北省武汉市新洲区	新洲区疾病预防控制中心			2013-12-24 09	继发	病原学阴性		杨丹	2013-12-24	新患者	初治		2013-12-24							治疗	湖北省武汉市新洲区	新洲区阳逻街卫生院		完成疗程
		1092	普通病案	湖北省武汉市硚口区	武汉市结核病防治所	湖北省武汉市硚口区	武汉市结核病防治所	420104019-2013-00525	1092	17	男性	汉族	学生	本县区	420104011		追踪	2013-12-06	2013-12-24	18	阴性	2013-12-25	湖北省武汉市硚口区	武汉市结核病防治所	湖北省武汉市硚口区	武汉市结核病防治所			2013-12-25 00	继发	病原学阴性		李佺	2013-12-25	新患者	初治		2013-12-25							治疗	湖北省武汉市硚口区	武汉市结核病防治所		完成疗程
		1093	普通病案	湖北省武汉市硚口区	武汉市结核病防治所	湖北省武汉市硚口区	武汉市结核病防治所	420104019-2013-00524	1093	16	男性	汉族	学生	本县区	420104002		转诊	2013-11-23	2013-12-23	30	阴性	2013-12-24	湖北省武汉市硚口区	武汉市结核病防治所	湖北省武汉市硚口区	武汉市结核病防治所			2013-12-24 00	继发	病原学阴性		张宗琪	2013-12-25	新患者	初治		2013-12-25							治疗	湖北省武汉市硚口区	武汉市结核病防治所		完成疗程
		1094	普通病案	湖北省武汉市洪山区	洪山区疾病预防控制中心	湖北省武汉市洪山区	洪山区疾病预防控制中心	420111016-2013-00639	1094	20	女性	汉族	学生	本县区	420111007		转诊	2013-09-01	2013-11-24	84	阴性	2013-12-26	湖北省武汉市洪山区	洪山区疾病预防控制中心	湖北省武汉市洪山区	洪山区疾病预防控制中心			2013-12-26 09	继发	病原学阴性		吴杰	2013-12-26	新患者	初治		2013-12-26							治疗	湖北省武汉市洪山区	洪山区洪山街社区卫生服务中心		完成疗程
		1095	普通病案	湖北省武汉市武昌区	武昌区疾病预防控制中心	湖北省武汉市武昌区	武昌区疾病预防控制中心	420106010-2014-00001	1095	18	男性	汉族	学生	本市其它县区	420106006		转诊	2013-12-08	2013-12-17	9	阴性	2014-01-02	湖北省武汉市武昌区	武昌区疾病预防控制中心	湖北省武汉市武昌区	武昌区疾病预防控制中心			2014-01-02 00	继发	病原学阴性		刘文	2014-01-02	新患者	初治		2014-01-02							治疗				完成疗程
		1096	普通病案	湖北省武汉市江汉区	武汉市江汉区疾病预防控制中心	湖北省武汉市江汉区	武汉市江汉区疾病预防控制中心	420103013-2014-00001	1096	19	女性	汉族	学生	本县区	420103012		追踪	2013-12-11	2013-12-16	5	阴性	2013-12-13	湖北省武汉市江汉区	武汉市江汉区疾病预防控制中心	湖北省武汉市江汉区	武汉市江汉区疾病预防控制中心			2014-01-02 09	继发	病原学阴性		陈国玺	2014-01-02	新患者	初治		2014-01-02							治疗	湖北省武汉市江汉区	江汉区汉兴街社区卫生服务中心		完成疗程
		1097	普通病案	湖北省武汉市青山区	青山区结核病防治所	湖北省武汉市青山区	青山区结核病防治所	420107018-2014-00005	1097	19	男性	汉族	学生	本市其它县区	420107010		追踪	2013-10-23	2013-12-03	41			湖北省武汉市青山区	青山区结核病防治所	湖北省武汉市青山区	青山区结核病防治所			2014-01-02 00	继发	病原学阴性		郑和平	2014-01-02	新患者	初治		2014-01-02							治疗	湖北省武汉市青山区	武汉市第九医院		完成疗程
		1098	普通病案	湖北省武汉市江夏区	武汉市江夏区疾病预防控制中心	湖北省武汉市江夏区	武汉市江夏区疾病预防控制中心	420115008-2014-00002	1098	20	男性	汉族	学生	本县区	420115405		转诊	2013-12-01	2014-01-01	31	阴性	2014-01-01	湖北省武汉市江夏区	武汉市江夏区疾病预防控制中心	湖北省武汉市江夏区	武汉市江夏区疾病预防控制中心			2014-01-03 10	继发	病原学阴性		田晓春	2014-01-03	新患者	初治		2014-01-03							治疗	湖北省武汉市江夏区	武汉市江夏区经济开发区大桥新区卫生院		完成疗程
		1099	普通病案	湖北省武汉市江夏区	武汉市江夏区疾病预防控制中心	湖北省武汉市江夏区	武汉市江夏区疾病预防控制中心	420115008-2014-00001	1099	20	男性	汉族	学生	本县区	420115001		转诊	2013-10-07	2013-12-24	78	阴性	2014-01-01	湖北省武汉市江夏区	武汉市江夏区疾病预防控制中心	湖北省武汉市江夏区	武汉市江夏区疾病预防控制中心			2014-01-03 09	继发	病原学阴性		田晓春	2014-01-03	新患者	初治		2014-01-03							治疗	湖北省武汉市江夏区	武汉市江夏区纸坊社区卫生服务中心		完成疗程
		1100	普通病案	湖北省武汉市东西湖区	东西湖区结核病防治所	湖北省武汉市东西湖区	东西湖区结核病防治所	420112019-2014-00001	1100	25	女性	汉族	学生	本县区	420112400		直接就诊	2013-12-01	2014-01-03	33			湖北省武汉市东西湖区	东西湖区结核病防治所	湖北省武汉市东西湖区	东西湖区结核病防治所			2014-01-03 09	继发	病原学阴性		孟刚	2014-01-03	新患者	初治		2014-01-03							治疗	湖北省武汉市东西湖区	常青花园社区卫生服务中心		完成疗程
		1101	普通病案	湖北省武汉市洪山区	洪山区疾病预防控制中心	湖北省武汉市洪山区	洪山区疾病预防控制中心	420111016-2014-00003	1101	23	男性	汉族	学生	本县区	420111002		转诊	2013-12-05	2013-12-18	13	阴性	2014-01-03	湖北省武汉市洪山区	洪山区疾病预防控制中心	湖北省武汉市洪山区	洪山区疾病预防控制中心			2014-01-03 00	继发	病原学阴性		吴杰	2014-01-03	新患者	初治		2014-01-03							治疗	湖北省武汉市洪山区	洪山区疾病预防控制中心		完成疗程
		1102	普通病案	湖北省武汉市洪山区	洪山区疾病预防控制中心	湖北省武汉市洪山区	洪山区疾病预防控制中心	420111016-2014-00007	1102	25	男性	汉族	学生	本县区	420111001		转诊	2013-12-04	2013-12-17	13	阴性	2014-01-03	湖北省武汉市洪山区	洪山区疾病预防控制中心	湖北省武汉市洪山区	洪山区疾病预防控制中心			2014-01-03 00	继发	病原学阴性		吴杰	2014-01-03	新患者	初治		2014-01-03							治疗	湖北省武汉市洪山区	武汉市洪山区中医医院		完成疗程
		1103	普通病案	湖北省武汉市洪山区	洪山区疾病预防控制中心	湖北省武汉市洪山区	洪山区疾病预防控制中心	420111016-2014-00008	1103	18	女性	汉族	学生	本县区	420111003		转诊	2013-12-10	2013-12-17	7	阴性	2014-01-03	湖北省武汉市洪山区	洪山区疾病预防控制中心	湖北省武汉市洪山区	洪山区疾病预防控制中心			2014-01-03 00	继发	病原学阴性		吴杰	2014-01-03	新患者	初治		2014-01-03							治疗	湖北省武汉市洪山区	湖北工业大学医院		完成疗程
		1104	普通病案	湖北省武汉市洪山区	洪山区疾病预防控制中心	湖北省武汉市洪山区	洪山区疾病预防控制中心	420111016-2014-00002	1104	22	女性	汉族	学生	本市其它县区	420111003		转诊	2013-11-11	2013-12-19	38	阴性	2014-01-03	湖北省武汉市洪山区	洪山区疾病预防控制中心	湖北省武汉市洪山区	洪山区疾病预防控制中心			2014-01-03 00	继发	病原学阴性		吴杰	2014-01-03	新患者	初治		2014-01-03							治疗	湖北省武汉市洪山区	洪山区狮子山街华中农业大学医院		完成疗程
		1105	普通病案	湖北省武汉市洪山区	洪山区疾病预防控制中心	湖北省武汉市洪山区	洪山区疾病预防控制中心	420111016-2014-00004	1105	22	女性	汉族	学生	本县区	420111002		转诊	2013-11-29	2013-12-18	19	阴性	2014-01-03	湖北省武汉市洪山区	洪山区疾病预防控制中心	湖北省武汉市洪山区	洪山区疾病预防控制中心			2014-01-03 00	继发	病原学阴性		吴杰	2014-01-03	新患者	初治		2014-01-03							治疗	湖北省武汉市洪山区	洪山区关山街华中科技大学医院		完成疗程
		1106	普通病案	湖北省武汉市洪山区	洪山区疾病预防控制中心	湖北省武汉市洪山区	洪山区疾病预防控制中心	420111016-2014-00010	1106	20	女性	汉族	学生	本县区	420111002		转诊	2013-12-10	2013-12-24	14	阴性	2014-01-03	湖北省武汉市洪山区	洪山区疾病预防控制中心	湖北省武汉市洪山区	洪山区疾病预防控制中心			2014-01-03 00	继发	病原学阴性		吴杰	2014-01-03	新患者	初治		2014-01-03							治疗	湖北省武汉市洪山区	中国地质大学医院		完成疗程
		1107	普通病案	湖北省武汉市洪山区	洪山区疾病预防控制中心	湖北省武汉市洪山区	洪山区疾病预防控制中心	420111016-2014-00016	1107	23	男性	汉族	学生	本县区	420111002		转诊	2013-12-24	2013-12-29	5	阴性	2014-01-05	湖北省武汉市洪山区	洪山区疾病预防控制中心	湖北省武汉市洪山区	洪山区疾病预防控制中心			2014-01-05 10	继发	病原学阴性		吴杰	2014-01-05	新患者	初治		2014-01-05							治疗	湖北省武汉市洪山区	中国地质大学医院		完成疗程
		1108	普通病案	湖北省武汉市洪山区	洪山区疾病预防控制中心	湖北省武汉市洪山区	洪山区疾病预防控制中心	420111016-2014-00014	1108	21	女性	汉族	学生	本县区	420111002		转诊	2013-12-01	2013-12-27	26	阴性	2014-01-05	湖北省武汉市洪山区	洪山区疾病预防控制中心	湖北省武汉市洪山区	洪山区疾病预防控制中心			2014-01-05 10	继发	病原学阴性		吴杰	2014-01-05	新患者	初治		2014-01-05							治疗	湖北省武汉市洪山区	洪山区疾病预防控制中心		完成疗程
		1109	普通病案	湖北省武汉市洪山区	洪山区疾病预防控制中心	湖北省武汉市洪山区	洪山区疾病预防控制中心	420111016-2014-00018	1109	24	男性	汉族	学生	本县区	420111002		转诊	2013-12-28	2014-01-02	5	阴性	2014-01-05	湖北省武汉市洪山区	洪山区疾病预防控制中心	湖北省武汉市洪山区	洪山区疾病预防控制中心			2014-01-05 09	继发	病原学阴性		吴杰	2014-01-05	新患者	初治		2014-01-05							治疗	湖北省武汉市洪山区	洪山区关山街邮电社区卫生服务中心		完成疗程
		1110	普通病案	湖北省武汉市江岸区	江岸区疾病预防控制中心	湖北省武汉市江岸区	江岸区疾病预防控制中心	420102000-2014-00005	1110	19	女性	汉族	学生	本市其它县区	420102010		转诊	2013-06-28	2013-12-28	183	阴性	2013-12-28	湖北省武汉市江岸区	江岸区疾病预防控制中心	湖北省武汉市江岸区	江岸区疾病预防控制中心			2014-01-06 14	继发	病原学阴性		张宗琪	2014-01-06	新患者	初治		2014-01-06							治疗	湖北省武汉市江岸区	江岸区二七街社区卫生服务中心		完成疗程
		1111	普通病案	湖北省武汉市洪山区	洪山区疾病预防控制中心	湖北省武汉市洪山区	洪山区疾病预防控制中心	420111016-2014-00021	1111	18	男性	汉族	学生	本县区	420111006		转诊	2013-12-19	2013-12-23	4	阴性	2014-01-06	湖北省武汉市洪山区	洪山区疾病预防控制中心	湖北省武汉市洪山区	洪山区疾病预防控制中心			2014-01-06 10	继发	病原学阴性		吴杰	2014-01-06	新患者	初治		2014-01-06							治疗	湖北省武汉市洪山区	洪山区疾病预防控制中心		完成疗程
		1112	普通病案	湖北省武汉市洪山区	洪山区疾病预防控制中心	湖北省武汉市洪山区	洪山区疾病预防控制中心	420111016-2014-00024	1112	21	女性	汉族	学生	本县区	420111006		转诊	2014-01-01	2014-01-02	1	阴性	2014-01-06	湖北省武汉市洪山区	洪山区疾病预防控制中心	湖北省武汉市洪山区	洪山区疾病预防控制中心			2014-01-06 10	继发	病原学阴性		吴杰	2014-01-06	新患者	初治		2014-01-06							治疗	湖北省武汉市洪山区	洪山区疾病预防控制中心		完成疗程
		1113	普通病案	湖北省武汉市江岸区	江岸区疾病预防控制中心	湖北省武汉市江岸区	江岸区疾病预防控制中心	420102000-2014-00007	1113	14	男性	汉族	学生	本市其它县区	420102007		追踪	2013-12-01	2014-01-07	37			湖北省武汉市江岸区	江岸区疾病预防控制中心	湖北省武汉市江岸区	江岸区疾病预防控制中心			2014-01-07 00	继发	病原学阳性		姚戈	2014-01-07	新患者	初治		2014-01-07							治疗	湖北省武汉市江岸区	江岸区西马街社区卫生服务中心		治愈
		1114	普通病案	湖北省武汉市青山区	青山区结核病防治所	湖北省武汉市青山区	青山区结核病防治所	420107018-2014-00007	1114	23	男性	汉族	学生	本县区	420107001		转诊	2013-12-10	2013-12-30	20			湖北省武汉市青山区	青山区结核病防治所	湖北省武汉市青山区	青山区结核病防治所			2014-01-07 00	继发	病原学阴性		郑和平	2014-01-07	新患者	初治		2014-01-07							治疗	湖北省武汉市青山区	武汉市第九医院		完成疗程
		1115	普通病案	湖北省武汉市洪山区	洪山区疾病预防控制中心	湖北省武汉市洪山区	洪山区疾病预防控制中心	420111016-2014-00025	1115	18	男性	汉族	学生	本县区	420111007		转诊	2013-11-27	2013-12-01	4	阴性	2014-01-07	湖北省武汉市洪山区	洪山区疾病预防控制中心	湖北省武汉市洪山区	洪山区疾病预防控制中心			2014-01-07 10	继发	病原学阴性		吴杰	2014-01-07	新患者	初治		2014-01-07							治疗	湖北省武汉市洪山区	洪山区关山街华中科技大学医院		完成疗程
		1116	普通病案	湖北省武汉市汉阳区	武汉市汉阳区结核病防治所	湖北省武汉市汉阳区	武汉市汉阳区结核病防治所	420105012-2014-00019	1116	17	男性	汉族	学生	本县区	420105011		健康体检	2013-11-28	2013-12-18	20	阴性	2014-01-07	湖北省武汉市汉阳区	武汉市汉阳区结核病防治所	湖北省武汉市汉阳区	武汉市汉阳区结核病防治所			2014-01-08 17	继发	病原学阴性		朱建	2014-01-08	新患者	初治	2014-03-06	2014-01-08							治疗	湖北省武汉市汉阳区	武汉市汉阳区江堤街社区卫生服务中心		完成疗程
		1117	普通病案	湖北省武汉市江夏区	武汉市江夏区疾病预防控制中心	湖北省武汉市江夏区	武汉市江夏区疾病预防控制中心	420115008-2014-00013	1117	17	男性	汉族	学生	本县区	420115001		转诊	2013-12-28	2013-12-30	2			湖北省武汉市江夏区	武汉市江夏区疾病预防控制中心	湖北省武汉市江夏区	武汉市江夏区疾病预防控制中心			2014-01-09 15	继发	病原学阴性		田晓春	2014-01-09	新患者	初治		2014-01-09							治疗	湖北省武汉市江夏区	武汉市江夏区纸坊社区卫生服务中心		完成疗程
		1118	普通病案	湖北省武汉市青山区	青山区结核病防治所	湖北省武汉市青山区	青山区结核病防治所	420107018-2014-00008	1118	24	男性	汉族	学生	本县区	420107001		转诊	2013-12-03	2014-01-03	31			湖北省武汉市青山区	青山区结核病防治所	湖北省武汉市青山区	青山区结核病防治所			2014-01-09 00	继发	病原学阳性		郑和平	2014-01-09	新患者	初治		2014-01-09							治疗	湖北省武汉市青山区	武汉市第九医院		丢失
		1119	普通病案	湖北省武汉市青山区	青山区结核病防治所	湖北省武汉市青山区	青山区结核病防治所	420107018-2014-00015	1119	15	女性	汉族	学生	本市其它县区	420107003		转诊	2013-10-23	2013-12-02	40			湖北省武汉市青山区	青山区结核病防治所	湖北省武汉市青山区	青山区结核病防治所			2014-01-13 00	继发	病原学阴性		郑和平	2014-01-13	新患者	初治		2014-01-13							治疗	湖北省武汉市青山区	青山区新沟桥街社区卫生服务中心		完成疗程
		1120	普通病案	湖北省武汉市洪山区	洪山区疾病预防控制中心	湖北省武汉市洪山区	洪山区疾病预防控制中心	420111016-2014-00037	1120	21	男性	汉族	学生	本县区	420111002		转诊	2014-01-09	2014-01-10	1	阴性	2014-01-14	湖北省武汉市洪山区	洪山区疾病预防控制中心	湖北省武汉市洪山区	洪山区疾病预防控制中心			2014-01-14 08	继发	病原学阴性		吴杰	2014-01-14	新患者	初治		2014-01-14							治疗	湖北省武汉市洪山区	中国地质大学医院		完成疗程
		1121	普通病案	湖北省武汉市江岸区	江岸区疾病预防控制中心	湖北省武汉市江岸区	江岸区疾病预防控制中心	420102000-2014-00016	1121	12	女性	汉族	学生	本市其它县区	420102011		转诊	2013-12-25	2014-01-08	14	阴性	2014-01-08	湖北省武汉市江岸区	江岸区疾病预防控制中心	湖北省武汉市江岸区	江岸区疾病预防控制中心			2014-01-16 00	继发	病原学阴性		曹探赜	2014-01-16	新患者	初治		2014-01-16							治疗	湖北省武汉市江岸区	江岸区新村街社区卫生服务中心		完成疗程
		1122	普通病案	湖北省武汉市武昌区	武昌区疾病预防控制中心	湖北省武汉市武昌区	武昌区疾病预防控制中心	420106010-2014-00032	1122	16	男性	汉族	学生	本市其它县区	420106002		转诊	2013-12-31	2014-01-03	3	阴性	2014-01-17	湖北省武汉市武昌区	武昌区疾病预防控制中心	湖北省武汉市武昌区	武昌区疾病预防控制中心			2014-01-17 09	继发	病原学阴性		刘文	2014-01-17	新患者	初治		2014-01-17							治疗				完成疗程
		1123	普通病案	湖北省武汉市武昌区	武昌区疾病预防控制中心	湖北省武汉市武昌区	武昌区疾病预防控制中心	420106010-2014-00038	1123	23	女性	汉族	学生	本市其它县区	420106013		转诊	2014-01-13	2014-01-18	5	阴性	2014-01-21	湖北省武汉市武昌区	武昌区疾病预防控制中心	湖北省武汉市武昌区	武昌区疾病预防控制中心			2014-01-21 10	继发	病原学阳性		刘文	2014-01-21	新患者	初治		2014-01-21							治疗				治愈
		1124	普通病案	湖北省武汉市洪山区	洪山区疾病预防控制中心	湖北省武汉市洪山区	洪山区疾病预防控制中心	420111016-2014-00053	1124	20	男性	汉族	学生	本县区	420111002		转诊	2013-12-15	2013-12-31	16	阴性	2014-01-21	湖北省武汉市洪山区	洪山区疾病预防控制中心	湖北省武汉市洪山区	洪山区疾病预防控制中心			2014-01-21 08	继发	病原学阴性		吴杰	2014-01-21	新患者	初治		2014-01-21							治疗	湖北省武汉市洪山区	中国地质大学医院		完成疗程
		1125	普通病案	湖北省武汉市洪山区	洪山区疾病预防控制中心	湖北省武汉市洪山区	洪山区疾病预防控制中心	420111016-2014-00056	1125	13	女性	汉族	学生	本县区	420111005		追踪	2013-12-01	2013-12-12	11	阴性	2014-01-21	湖北省武汉市洪山区	洪山区疾病预防控制中心	湖北省武汉市洪山区	洪山区疾病预防控制中心			2014-01-21 09	继发	病原学阴性		吴杰	2014-01-21	新患者	初治		2014-01-21							治疗	湖北省武汉市洪山区	洪山区和平街社区卫生服务中心		完成疗程
		1126	普通病案	湖北省武汉市江夏区	武汉市江夏区疾病预防控制中心	湖北省武汉市江夏区	武汉市江夏区疾病预防控制中心	420115008-2014-00033	1126	21	男性	汉族	学生	本县区	420115010		追踪	2013-12-24	2014-01-22	29			湖北省武汉市江夏区	武汉市江夏区疾病预防控制中心	湖北省武汉市江夏区	武汉市江夏区疾病预防控制中心			2014-01-22 16	继发	病原学阴性		田晓春	2014-01-22	新患者	初治	2014-03-22	2014-01-22							治疗	湖北省武汉市江夏区	武汉市江夏区五里界社区卫生服务中心		完成疗程
		1127	普通病案	湖北省武汉市蔡甸区	武汉市蔡甸区疾病预防控制中心	湖北省武汉市蔡甸区	武汉市蔡甸区疾病预防控制中心	420114003-2014-00031	1127	18	男性	汉族	学生	本市其它县区	420114001		转诊	2013-12-28	2014-01-24	27	阴性	2014-01-24	湖北省武汉市蔡甸区	武汉市蔡甸区疾病预防控制中心	湖北省武汉市蔡甸区	武汉市蔡甸区疾病预防控制中心			2014-01-24 15	继发	病原学阳性		刘晓燕	2014-01-24	新患者	初治		2014-01-24							治疗	湖北省武汉市蔡甸区	武汉市蔡甸区蔡甸街卫生院		治愈
		1128	普通病案	湖北省武汉市江夏区	武汉市江夏区疾病预防控制中心	湖北省武汉市江夏区	武汉市江夏区疾病预防控制中心	420115008-2014-00037	1128	18	男性	汉族	学生	本县区	420115010		转诊	2014-01-01	2014-01-09	8			湖北省武汉市江夏区	武汉市江夏区疾病预防控制中心	湖北省武汉市江夏区	武汉市江夏区疾病预防控制中心			2014-01-26 15	继发	病原学阴性	无	田晓春	2014-01-26	新患者	初治	2014-03-26	2014-01-26							治疗	湖北省武汉市江夏区	武汉市江夏区五里界社区卫生服务中心		完成疗程
		1129	普通病案	湖北省武汉市洪山区	洪山区疾病预防控制中心	湖北省武汉市洪山区	洪山区疾病预防控制中心	420111016-2014-00066	1129	21	男性	汉族	学生	本县区	420111002		转诊	2013-10-10	2014-01-24	106	阴性	2014-01-26	湖北省武汉市洪山区	洪山区疾病预防控制中心	湖北省武汉市洪山区	洪山区疾病预防控制中心			2014-01-26 09	继发	病原学阴性		吴杰	2014-01-26	新患者	初治		2014-01-26							治疗	湖北省武汉市洪山区	洪山区关山街华中科技大学医院		完成疗程
		1130	普通病案	湖北省武汉市洪山区	洪山区疾病预防控制中心	湖北省武汉市洪山区	洪山区疾病预防控制中心	420111016-2014-00062	1130	19	女性	汉族	学生	本县区	420111003		转诊	2014-01-01	2014-01-22	21	阴性	2014-01-26	湖北省武汉市洪山区	洪山区疾病预防控制中心	湖北省武汉市洪山区	洪山区疾病预防控制中心			2014-01-26 09	继发	病原学阳性		吴杰	2014-01-26	新患者	初治		2014-01-26							治疗	湖北省武汉市洪山区	湖北工业大学医院		治愈
		1131	普通病案	湖北省武汉市武昌区	武昌区疾病预防控制中心	湖北省武汉市武昌区	武昌区疾病预防控制中心	420106010-2014-00051	1131	20	男性	汉族	学生	本市其它县区	420106008		追踪	2013-12-10	2013-12-17	7	阴性	2014-01-27	湖北省武汉市武昌区	武昌区疾病预防控制中心	湖北省武汉市武昌区	武昌区疾病预防控制中心			2014-01-27 10	继发	病原学阴性		刘文	2014-01-27	新患者	初治		2014-01-27							治疗				完成疗程
		1132	普通病案	湖北省武汉市武昌区	武昌区疾病预防控制中心	湖北省武汉市武昌区	武昌区疾病预防控制中心	420106010-2014-00052	1132	24	男性	汉族	学生	本市其它县区	420106002		追踪	2013-11-26	2013-12-16	20	阴性	2014-01-27	湖北省武汉市武昌区	武昌区疾病预防控制中心	湖北省武汉市武昌区	武昌区疾病预防控制中心			2014-01-27 08	继发	病原学阴性		刘文	2014-01-27	新患者	初治		2014-01-27							治疗				完成疗程
		1133	普通病案	湖北省武汉市武昌区	武昌区疾病预防控制中心	湖北省武汉市武昌区	武昌区疾病预防控制中心	420106010-2014-00061	1133	21	男性	汉族	学生	本市其它县区	420106013		追踪	2013-12-06	2013-12-22	16	阴性	2014-02-07	湖北省武汉市武昌区	武昌区疾病预防控制中心	湖北省武汉市武昌区	武昌区疾病预防控制中心			2014-02-07 00	继发	病原学阴性		刘文	2014-02-07	新患者	初治		2014-02-07							治疗				完成疗程
		1134	普通病案	湖北省武汉市汉阳区	武汉市汉阳区结核病防治所	湖北省武汉市汉阳区	武汉市汉阳区结核病防治所	420105012-2014-00037	1134	17	男性	汉族	学生	本县区	420105009		转诊	2013-11-26	2013-12-26	30	阴性	2013-12-26	湖北省武汉市汉阳区	武汉市汉阳区结核病防治所	湖北省武汉市汉阳区	武汉市汉阳区结核病防治所			2014-02-10 09	继发	病原学阴性		马莉	2014-02-10	新患者	初治	2014-02-26	2014-02-10							治疗	湖北省武汉市汉阳区	武汉市汉阳区二桥街社区卫生服务中心		完成疗程
		1135	普通病案	湖北省武汉市黄陂区	武汉市黄陂区疾病预防控制中心	湖北省武汉市黄陂区	武汉市黄陂区疾病预防控制中心	420116003-2014-00077	1135	21	男性	汉族	学生	本市其它县区	420116005		转诊	2014-01-15	2014-01-20	5			湖北省武汉市黄陂区	武汉市黄陂区疾病预防控制中心	湖北省武汉市黄陂区	武汉市黄陂区疾病预防控制中心			2014-02-10 10	继发	病原学阴性		汪亮	2014-02-10	新患者	初治		2014-02-10							治疗	湖北省武汉市黄陂区	武汉市黄陂区滠口街道卫生院		完成疗程
		1136	普通病案	湖北省武汉市江汉区	武汉市江汉区疾病预防控制中心	湖北省武汉市江汉区	武汉市江汉区疾病预防控制中心	420103013-2014-00041	1136	19	女性	汉族	学生	本县区	420103009		转诊	2014-01-25	2014-01-29	4	阴性	2014-01-29	湖北省武汉市江汉区	武汉市江汉区疾病预防控制中心	湖北省武汉市江汉区	武汉市江汉区疾病预防控制中心			2014-02-10 08	继发	病原学阴性		王娅陈志坚	2014-02-10	新患者	初治		2014-02-10							治疗				完成疗程
		1137	普通病案	湖北省武汉市洪山区	洪山区疾病预防控制中心	湖北省武汉市洪山区	洪山区疾病预防控制中心	420111016-2014-00078	1137	20	男性	汉族	学生	本县区	420111002		转诊	2014-02-01	2014-02-06	5	阴性	2014-02-10	湖北省武汉市洪山区	洪山区疾病预防控制中心	湖北省武汉市洪山区	洪山区疾病预防控制中心			2014-02-10 08	继发	病原学阴性		吴杰	2014-02-10	新患者	初治		2014-02-10							治疗	湖北省武汉市洪山区	洪山区疾病预防控制中心		完成疗程
		1138	普通病案	湖北省武汉市武昌区	武昌区疾病预防控制中心	湖北省武汉市武昌区	武昌区疾病预防控制中心	420106010-2014-00074	1138	16	男性	汉族	学生	本县区	420106008		直接就诊	2014-02-04	2014-02-11	7	阴性	2014-02-11	湖北省武汉市武昌区	武昌区疾病预防控制中心	湖北省武汉市武昌区	武昌区疾病预防控制中心			2014-02-11 00	继发	病原学阴性		刘文	2014-02-11	新患者	初治		2014-02-11							治疗				完成疗程
		1139	普通病案	湖北省武汉市江夏区	武汉市江夏区疾病预防控制中心	湖北省武汉市江夏区	武汉市江夏区疾病预防控制中心	420115008-2014-00062	1139	21	男性	汉族	学生	本县区	420115010		追踪	2014-01-03	2014-02-13	41	阴性	2014-02-14	湖北省武汉市江夏区	武汉市江夏区疾病预防控制中心	湖北省武汉市江夏区	武汉市江夏区疾病预防控制中心			2014-02-14 09	继发	病原学阴性	无	田晓春	2014-02-14	新患者	初治	2014-04-14	2014-02-14							治疗	湖北省武汉市江夏区	藏龙岛经院社区卫生服务中心		完成疗程
		1140	普通病案	湖北省武汉市青山区	青山区结核病防治所	湖北省武汉市青山区	青山区结核病防治所	420107018-2014-00025	1140	21	男性	汉族	学生	本市其它县区	420107005		转诊	2013-12-26	2014-01-16	21			湖北省武汉市青山区	青山区结核病防治所	湖北省武汉市青山区	青山区结核病防治所			2014-02-14 00	继发	病原学阳性		郑和平	2014-02-14	新患者	初治		2014-02-14							治疗	湖北省武汉市青山区	青山区厂前街社区卫生服务中心		治愈
		1141	普通病案	湖北省武汉市黄陂区	武汉市黄陂区疾病预防控制中心	湖北省武汉市黄陂区	武汉市黄陂区疾病预防控制中心	420116003-2014-00101	1141	14	男性	汉族	学生	本县区	420116011		转诊	2014-02-12	2014-02-18	6			湖北省武汉市黄陂区	武汉市黄陂区疾病预防控制中心	湖北省武汉市黄陂区	武汉市黄陂区疾病预防控制中心			2014-02-18 10	继发	病原学阴性		汪亮	2014-02-18	新患者	初治		2014-02-18							治疗	湖北省武汉市黄陂区	武汉市黄陂区李家集街道中心卫生院		完成疗程
		1142	普通病案	湖北省武汉市江岸区	江岸区疾病预防控制中心	湖北省武汉市江岸区	江岸区疾病预防控制中心	420102000-2014-00059	1142	18	男性	汉族	学生	本市其它县区	420102012		转诊	2014-01-18	2014-01-25	7	阴性	2014-01-25	湖北省武汉市江岸区	江岸区疾病预防控制中心	湖北省武汉市江岸区	江岸区疾病预防控制中心			2014-02-19 09	继发	病原学阴性		杜娟	2014-02-19	新患者	初治		2014-02-19							治疗	湖北省武汉市江岸区	江岸区丹水池街社区卫生服务中心		完成疗程
		1143	普通病案	湖北省武汉市青山区	青山区结核病防治所	湖北省武汉市青山区	青山区结核病防治所	420107018-2014-00038	1143	20	男性	汉族	学生	本市其它县区	420107010		转诊	2014-01-27	2014-02-06	10	阴性	2014-02-12	湖北省武汉市青山区	青山区结核病防治所	湖北省武汉市青山区	青山区结核病防治所			2014-02-20 00	继发	病原学阴性		郑和平	2014-02-20	新患者	初治		2014-02-20							治疗	湖北省武汉市青山区	青山区结核病防治所		完成疗程
		1144	普通病案	湖北省武汉市洪山区	洪山区疾病预防控制中心	湖北省武汉市洪山区	洪山区疾病预防控制中心	420111016-2014-00093	1144	30	男性	汉族	学生	本县区	420111003		转诊	2014-02-14	2014-02-17	3	阴性	2014-02-20	湖北省武汉市洪山区	洪山区疾病预防控制中心	湖北省武汉市洪山区	洪山区疾病预防控制中心			2014-02-20 11	继发	病原学阴性		吴杰	2014-02-20	新患者	初治		2014-02-20							治疗	湖北省武汉市洪山区	洪山区狮子山街华中农业大学医院		其他
		1145	普通病案	湖北省武汉市洪山区	洪山区疾病预防控制中心	湖北省武汉市洪山区	洪山区疾病预防控制中心	420111016-2014-00095	1145	23	男性	汉族	学生	本县区	420111002		转诊	2014-02-18	2014-02-19	1	阴性	2014-02-20	湖北省武汉市洪山区	洪山区疾病预防控制中心	湖北省武汉市洪山区	洪山区疾病预防控制中心			2014-02-20 11	继发	病原学阴性		吴杰	2014-02-20	新患者	初治		2014-02-20							治疗	湖北省武汉市洪山区	洪山区疾病预防控制中心		完成疗程
		1146	普通病案	湖北省武汉市洪山区	洪山区疾病预防控制中心	湖北省武汉市洪山区	洪山区疾病预防控制中心	420111016-2014-00088	1146	20	男性	汉族	学生	本县区	420111002		转诊	2014-02-08	2014-02-09	1	阴性	2014-02-20	湖北省武汉市洪山区	洪山区疾病预防控制中心	湖北省武汉市洪山区	洪山区疾病预防控制中心			2014-02-20 10	继发	病原学阴性		吴杰	2014-02-20	新患者	初治		2014-02-20							治疗	湖北省武汉市洪山区	洪山区关山街华中科技大学医院		完成疗程
		1147	普通病案	湖北省武汉市武昌区	武昌区疾病预防控制中心	湖北省武汉市武昌区	武昌区疾病预防控制中心	420106010-2014-00099	1147	18	男性	汉族	学生	本市其它县区	420106015		转诊	2014-02-05	2014-02-12	7	阴性	2014-02-21	湖北省武汉市武昌区	武昌区疾病预防控制中心	湖北省武汉市武昌区	武昌区疾病预防控制中心			2014-02-21 09	继发	病原学阴性		刘文	2014-02-21	新患者	初治		2014-02-21							治疗				完成疗程
		1148	普通病案	湖北省武汉市洪山区	洪山区疾病预防控制中心	湖北省武汉市洪山区	洪山区疾病预防控制中心	420111016-2014-00098	1148	22	女性	汉族	学生	本县区	420111003		转诊	2014-02-11	2014-02-21	10	阴性	2014-02-24	湖北省武汉市洪山区	洪山区疾病预防控制中心	湖北省武汉市洪山区	洪山区疾病预防控制中心			2014-02-24 08	继发	病原学阴性		吴杰	2014-02-24	新患者	初治		2014-02-24							治疗	湖北省武汉市洪山区	洪山区狮子山街华中农业大学医院		其他
		1149	普通病案	湖北省武汉市洪山区	洪山区疾病预防控制中心	湖北省武汉市洪山区	洪山区疾病预防控制中心	420111016-2014-00099	1149	26	男性	汉族	学生	本县区	420111001		转诊	2014-01-18	2014-02-20	33	阴性	2014-02-24	湖北省武汉市洪山区	洪山区疾病预防控制中心	湖北省武汉市洪山区	洪山区疾病预防控制中心			2014-02-24 10	继发	病原学阴性		吴杰	2014-02-24	新患者	初治		2014-02-24							治疗	湖北省武汉市洪山区	洪山区珞南街华中师范大学医院		完成疗程
		1150	普通病案	湖北省武汉市武昌区	武昌区疾病预防控制中心	湖北省武汉市武昌区	武昌区疾病预防控制中心	420106010-2014-00111	1150	20	女性	汉族	学生	本市其它县区	420106005		转诊	2014-01-30	2014-02-20	21	阴性	2014-02-27	湖北省武汉市武昌区	武昌区疾病预防控制中心	湖北省武汉市武昌区	武昌区疾病预防控制中心			2014-02-27 09	继发	病原学阳性		刘文	2014-02-27	新患者	初治		2014-02-27							治疗				治愈
		1151	普通病案	湖北省武汉市洪山区	洪山区疾病预防控制中心	湖北省武汉市洪山区	洪山区疾病预防控制中心	420111016-2014-00100	1151	20	男性	汉族	学生	本县区	420111011		转诊	2014-02-23	2014-02-26	3	阴性	2014-02-27	湖北省武汉市洪山区	洪山区疾病预防控制中心	湖北省武汉市洪山区	洪山区疾病预防控制中心			2014-02-27 09	继发	病原学阴性		吴杰	2014-02-27	新患者	初治		2014-02-27							治疗	湖北省武汉市洪山区	武汉市洪山区张家湾街社区卫生中心		完成疗程
		1152	普通病案	湖北省武汉市洪山区	洪山区疾病预防控制中心	湖北省武汉市洪山区	洪山区疾病预防控制中心	420111016-2014-00103	1152	21	男性	汉族	学生	本县区	420111002		追踪	2013-12-05	2014-01-10	36	阴性	2014-02-27	湖北省武汉市洪山区	洪山区疾病预防控制中心	湖北省武汉市洪山区	洪山区疾病预防控制中心			2014-02-27 11	继发	病原学阴性		朱国强	2014-02-27	新患者	初治		2014-02-27							治疗	湖北省武汉市洪山区	中国地质大学医院		完成疗程
		1153	普通病案	湖北省武汉市洪山区	洪山区疾病预防控制中心	湖北省武汉市洪山区	洪山区疾病预防控制中心	420111016-2014-00101	1153	22	女性	汉族	学生	本县区	420111001		转诊	2014-01-01	2014-02-25	55	阴性	2014-02-27	湖北省武汉市洪山区	洪山区疾病预防控制中心	湖北省武汉市洪山区	洪山区疾病预防控制中心			2014-02-27 09	继发	病原学阴性		吴杰	2014-02-27	新患者	初治		2014-02-27							治疗	湖北省武汉市洪山区	洪山区珞南街理工大社区卫生服务中心		完成疗程
		1154	普通病案	湖北省武汉市东西湖区	东西湖区结核病防治所	湖北省武汉市东西湖区	东西湖区结核病防治所	420112019-2014-00039	1154	18	男性	汉族	学生	本县区	420112012		直接就诊	2014-01-28	2014-02-14	17			湖北省武汉市东西湖区	东西湖区结核病防治所	湖北省武汉市东西湖区	东西湖区结核病防治所			2014-02-28 17	继发	病原学阴性		孟刚	2014-02-28	新患者	初治		2014-02-28							治疗	湖北省武汉市东西湖区	东西湖区东山街卫生院		完成疗程
		1155	普通病案	湖北省武汉市武昌区	武昌区疾病预防控制中心	湖北省武汉市武昌区	武昌区疾病预防控制中心	420106010-2014-00119	1155	19	女性	汉族	学生	本市其它县区	420106010		追踪	2014-01-21	2014-01-29	8	阴性	2014-03-04	湖北省武汉市武昌区	武昌区疾病预防控制中心	湖北省武汉市武昌区	武昌区疾病预防控制中心			2014-03-04 09	继发	病原学阳性		刘文	2014-03-04	新患者	初治		2014-03-04							治疗				治愈
		1156	普通病案	湖北省武汉市江岸区	江岸区疾病预防控制中心	湖北省武汉市江岸区	江岸区疾病预防控制中心	420102000-2014-00080	1156	17	女性	汉族	学生	本市其它县区	420102015		转诊	2014-02-02	2014-02-22	20	阴性	2014-02-22	湖北省武汉市江岸区	江岸区疾病预防控制中心	湖北省武汉市江岸区	江岸区疾病预防控制中心			2014-03-04 08	继发	病原学阴性		姚芳	2014-03-04	新患者	初治		2014-03-04							治疗	湖北省武汉市江岸区	江岸区花桥街第二社区卫生服务中心		完成疗程
		1157	普通病案	湖北省武汉市青山区	青山区结核病防治所	湖北省武汉市青山区	青山区结核病防治所	420107018-2014-00042	1157	20	男性	汉族	学生	本市其它县区	420107001		转诊	2014-01-02	2014-02-19	48	阴性	2014-02-25	湖北省武汉市青山区	青山区结核病防治所	湖北省武汉市青山区	青山区结核病防治所			2014-03-04 09	继发	病原学阴性		郑和平	2014-03-04	新患者	初治		2014-03-04							治疗	湖北省武汉市青山区	武汉市第九医院		完成疗程
		1158	普通病案	湖北省武汉市江岸区	江岸区疾病预防控制中心	湖北省武汉市江岸区	江岸区疾病预防控制中心	420102000-2014-00081	1158	18	男性	汉族	学生	本市其它县区	420102011		转诊	2014-02-19	2014-02-19	0	未提供		湖北省武汉市江岸区	江岸区疾病预防控制中心	湖北省武汉市江岸区	江岸区疾病预防控制中心			2014-03-05 08	继发	病原学阴性		骆燕林	2014-03-05	新患者	初治		2014-03-05							治疗	湖北省武汉市江岸区	江岸区新村街社区卫生服务中心		完成疗程
		1159	普通病案	湖北省武汉市硚口区	武汉市结核病防治所	湖北省武汉市硚口区	武汉市结核病防治所	420104019-2014-00082	1159	24	男性	汉族	学生	本县区	420104005		转诊	2014-02-28	2014-03-04	4	阴性	2014-03-05	湖北省武汉市硚口区	武汉市结核病防治所	湖北省武汉市硚口区	武汉市结核病防治所			2014-03-05 14	继发	病原学阴性		连展	2014-03-05	新患者	初治		2014-03-05							治疗	湖北省武汉市硚口区	武汉市结核病防治所		完成疗程
		1160	普通病案	湖北省武汉市硚口区	武汉市结核病防治所	湖北省武汉市硚口区	武汉市结核病防治所	420104019-2014-00079	1160	16	男性	汉族	学生	本县区	420104003		转诊	2014-02-28	2014-03-04	4	阴性	2014-03-05	湖北省武汉市硚口区	武汉市结核病防治所	湖北省武汉市硚口区	武汉市结核病防治所			2014-03-05 09	继发	病原学阳性		曾洁	2014-03-05	新患者	初治		2014-03-05							治疗	湖北省武汉市硚口区	武汉市结核病防治所		治愈
		1161	普通病案	湖北省武汉市洪山区	洪山区疾病预防控制中心	湖北省武汉市洪山区	洪山区疾病预防控制中心	420111016-2014-00112	1161	23	男性	汉族	学生	本县区	420111002		转诊	2014-03-01	2014-03-04	3	阴性	2014-03-06	湖北省武汉市洪山区	洪山区疾病预防控制中心	湖北省武汉市洪山区	洪山区疾病预防控制中心			2014-03-06 10	继发	病原学阳性		吴杰	2014-03-06	复发	复治		2014-03-06							治疗	湖北省武汉市洪山区	中国地质大学医院		治愈
		1162	普通病案	湖北省武汉市洪山区	洪山区疾病预防控制中心	湖北省武汉市洪山区	洪山区疾病预防控制中心	420111016-2014-00110	1162	25	男性	汉族	学生	本县区	420111002		转诊	2014-02-18	2014-03-05	15			湖北省武汉市洪山区	洪山区疾病预防控制中心	湖北省武汉市洪山区	洪山区疾病预防控制中心			2014-03-06 10	继发	病原学阴性		吴杰	2014-03-06	新患者	初治		2014-03-06							治疗	湖北省武汉市洪山区	洪山区关山街华中科技大学医院		完成疗程
		1163	普通病案	湖北省武汉市洪山区	洪山区疾病预防控制中心	湖北省武汉市洪山区	洪山区疾病预防控制中心	420111016-2014-00111	1163	20	男性	汉族	学生	本县区	420111002		转诊	2014-02-28	2014-03-05	5	阴性	2014-03-06	湖北省武汉市洪山区	洪山区疾病预防控制中心	湖北省武汉市洪山区	洪山区疾病预防控制中心			2014-03-06 10	继发	病原学阳性		吴杰	2014-03-06	新患者	初治		2014-03-06							治疗	湖北省武汉市洪山区	洪山区疾病预防控制中心		治愈
		1164	普通病案	湖北省武汉市洪山区	洪山区疾病预防控制中心	湖北省武汉市洪山区	洪山区疾病预防控制中心	420111016-2014-00113	1164	21	男性	汉族	学生	本县区	420111002		转诊	2014-01-05	2014-01-06	1	阴性	2014-03-10	湖北省武汉市洪山区	洪山区疾病预防控制中心	湖北省武汉市洪山区	洪山区疾病预防控制中心			2014-03-10 09	继发	病原学阴性		吴杰	2014-03-10	新患者	初治		2014-03-10							治疗	湖北省武汉市洪山区	中国地质大学医院		完成疗程
		1165	普通病案	湖北省武汉市江汉区	武汉市江汉区疾病预防控制中心	湖北省武汉市江汉区	武汉市江汉区疾病预防控制中心	420103013-2014-00075	1165	21	女性	汉族	学生	本县区	420103012		转诊	2014-02-27	2014-03-02	3	阴性	2014-03-02	湖北省武汉市江汉区	武汉市江汉区疾病预防控制中心	湖北省武汉市江汉区	武汉市江汉区疾病预防控制中心			2014-03-11 08	继发	病原学阴性		罗艺	2014-03-11	新患者	初治		2014-03-11							治疗	湖北省武汉市江汉区	江汉区汉兴街社区卫生服务中心		完成疗程
		1166	普通病案	湖北省武汉市汉阳区	武汉市汉阳区结核病防治所	湖北省武汉市汉阳区	武汉市汉阳区结核病防治所	420105012-2014-00069	1166	19	女性	汉族	学生	本县区	420105004		转诊	2014-03-04	2014-03-13	9	阴性	2014-03-05	湖北省武汉市汉阳区	武汉市汉阳区结核病防治所	湖北省武汉市汉阳区	武汉市汉阳区结核病防治所			2014-03-13 14	继发	病原学阴性		马莉	2014-03-13	新患者	初治	2014-05-05	2014-03-13							治疗	湖北省武汉市汉阳区	汉阳区晴川街社区卫生服务中心		完成疗程
		1167	普通病案	湖北省武汉市青山区	青山区结核病防治所	湖北省武汉市青山区	青山区结核病防治所	420107018-2014-00041	1167	17	女性	汉族	学生	本县区	420107005		转诊	2014-02-18	2014-03-08	18			湖北省武汉市青山区	青山区结核病防治所	湖北省武汉市青山区	青山区结核病防治所			2014-03-13 10	继发	病原学阳性		郑和平	2014-03-13	新患者	初治		2014-03-13							治疗	湖北省武汉市青山区	青山区工人村街社区卫生服务中心		治愈
		1168	普通病案	湖北省武汉市洪山区	洪山区疾病预防控制中心	湖北省武汉市洪山区	洪山区疾病预防控制中心	420111016-2014-00120	1168	20	男性	汉族	学生	本县区	420111002		转诊	2014-03-06	2014-03-11	5	阴性	2014-03-13	湖北省武汉市洪山区	洪山区疾病预防控制中心	湖北省武汉市洪山区	洪山区疾病预防控制中心			2014-03-13 09	继发	病原学阴性		朱国强	2014-03-13	新患者	初治		2014-03-13							治疗	湖北省武汉市洪山区	中国地质大学医院		完成疗程
		1169	普通病案	湖北省武汉市洪山区	洪山区疾病预防控制中心	湖北省武汉市洪山区	洪山区疾病预防控制中心	420111016-2014-00121	1169	22	男性	汉族	学生	本县区	420111001		转诊	2014-03-08	2014-03-10	2	阴性	2014-03-13	湖北省武汉市洪山区	洪山区疾病预防控制中心	湖北省武汉市洪山区	洪山区疾病预防控制中心			2014-03-13 09	继发	病原学阴性		朱国强	2014-03-13	新患者	初治		2014-03-13							治疗	湖北省武汉市洪山区	中国地质大学医院		完成疗程
		1170	普通病案	湖北省武汉市洪山区	洪山区疾病预防控制中心	湖北省武汉市洪山区	洪山区疾病预防控制中心	420111016-2014-00123	1170	18	女性	汉族	学生	本县区	420111003		转诊	2014-03-06	2014-03-10	4	阴性	2014-03-13	湖北省武汉市洪山区	洪山区疾病预防控制中心	湖北省武汉市洪山区	洪山区疾病预防控制中心			2014-03-13 09	继发	病原学阴性		朱国强	2014-03-13	新患者	初治		2014-03-13							治疗	湖北省武汉市洪山区	湖北工业大学医院		完成疗程
		1171	普通病案	湖北省武汉市硚口区	武汉市结核病防治所	湖北省武汉市硚口区	武汉市结核病防治所	420104019-2014-00108	1171	19	男性	汉族	学生	本县区	420104005		直接就诊	2014-02-26	2014-03-16	18	阴性	2014-03-17	湖北省武汉市硚口区	武汉市结核病防治所	湖北省武汉市硚口区	武汉市结核病防治所			2014-03-17 15	继发	病原学阴性		金武	2014-03-17	新患者	初治		2014-03-17							治疗	湖北省武汉市硚口区	武汉市结核病防治所		完成疗程
		1172	普通病案	湖北省武汉市洪山区	洪山区疾病预防控制中心	湖北省武汉市洪山区	洪山区疾病预防控制中心	420111016-2014-00128	1172	21	男性	汉族	学生	本县区	420111002		转诊	2014-03-11	2014-03-14	3	阴性	2014-03-17	湖北省武汉市洪山区	洪山区疾病预防控制中心	湖北省武汉市洪山区	洪山区疾病预防控制中心			2014-03-17 14	继发	病原学阴性		朱国强	2014-03-17	新患者	初治		2014-03-17							治疗	湖北省武汉市洪山区	洪山区疾病预防控制中心		完成疗程
		1173	普通病案	湖北省武汉市洪山区	洪山区疾病预防控制中心	湖北省武汉市洪山区	洪山区疾病预防控制中心	420111016-2014-00126	1173	25	女性	汉族	学生	本县区	420111001		转诊	2014-03-11	2014-03-12	1	阴性	2014-03-17	湖北省武汉市洪山区	洪山区疾病预防控制中心	湖北省武汉市洪山区	洪山区疾病预防控制中心			2014-03-17 14	继发	病原学阴性		朱国强	2014-03-17	新患者	初治		2014-03-17							治疗	湖北省武汉市洪山区	洪山区珞南街理工大社区卫生服务中心		完成疗程
		1174	普通病案	湖北省武汉市武昌区	武昌区疾病预防控制中心	湖北省武汉市武昌区	武昌区疾病预防控制中心	420106010-2014-00136	1174	21	女性	汉族	学生	本市其它县区	420106010		转诊	2014-02-28	2014-03-07	7	阴性	2014-03-18	湖北省武汉市武昌区	武昌区疾病预防控制中心	湖北省武汉市武昌区	武昌区疾病预防控制中心			2014-03-18 08	继发	病原学阳性		刘文	2014-03-18	新患者	初治		2014-03-18							治疗				治愈
		1175	普通病案	湖北省武汉市武昌区	武昌区疾病预防控制中心	湖北省武汉市武昌区	武昌区疾病预防控制中心	420106010-2014-00142	1175	20	男性	汉族	学生	本县区	420106012		直接就诊	2014-03-10	2014-03-18	8	阴性	2014-03-18	湖北省武汉市武昌区	武昌区疾病预防控制中心	湖北省武汉市武昌区	武昌区疾病预防控制中心			2014-03-18 14	继发	病原学阴性		刘文	2014-03-18	新患者	初治		2014-03-18							治疗				完成疗程
		1176	普通病案	湖北省武汉市青山区	青山区结核病防治所	湖北省武汉市青山区	青山区结核病防治所	420107018-2014-00056	1176	19	女性	汉族	学生	本市其它县区	420107001		转诊	2014-02-22	2014-02-24	2	阴性	2014-03-12	湖北省武汉市青山区	青山区结核病防治所	湖北省武汉市青山区	青山区结核病防治所			2014-03-19 09	继发	病原学阴性		郑和平	2014-03-19	新患者	初治		2014-03-19							治疗	湖北省武汉市青山区	武汉市第九医院		完成疗程
		1177	普通病案	湖北省武汉市洪山区	洪山区疾病预防控制中心	湖北省武汉市洪山区	洪山区疾病预防控制中心	420111016-2014-00135	1177	21	男性	汉族	学生	本县区	420111003		转诊	2014-03-07	2014-03-17	10	阴性	2014-03-19	湖北省武汉市洪山区	洪山区疾病预防控制中心	湖北省武汉市洪山区	洪山区疾病预防控制中心			2014-03-19 09	继发	病原学阴性		朱国强	2014-03-19	新患者	初治		2014-03-19							治疗	湖北省武汉市洪山区	湖北工业大学医院		完成疗程
		1178	普通病案	湖北省武汉市武昌区	武昌区疾病预防控制中心	湖北省武汉市武昌区	武昌区疾病预防控制中心	420106010-2014-00157	1178	19	男性	汉族	学生	本市其它县区	420106003		追踪	2014-01-05	2014-01-08	3	阴性	2014-03-21	湖北省武汉市武昌区	武昌区疾病预防控制中心	湖北省武汉市武昌区	武昌区疾病预防控制中心			2014-03-21 10	继发	病原学阴性		刘文	2014-03-21	新患者	初治		2014-03-21							治疗				完成疗程
		1179	普通病案	湖北省武汉市武昌区	武昌区疾病预防控制中心	湖北省武汉市武昌区	武昌区疾病预防控制中心	420106010-2014-00158	1179	24	男性	汉族	学生	本市其它县区	420106002		追踪	2013-11-28	2014-01-09	42	阴性	2014-03-21	湖北省武汉市武昌区	武昌区疾病预防控制中心	湖北省武汉市武昌区	武昌区疾病预防控制中心			2014-03-21 09	继发	病原学阴性		刘文	2014-03-21	新患者	初治		2014-03-21							治疗				完成疗程
		1180	普通病案	湖北省武汉市江汉区	武汉市江汉区疾病预防控制中心	湖北省武汉市江汉区	武汉市江汉区疾病预防控制中心	420103013-2014-00084	1180	22	男性	汉族	学生	本县区	420103004		转诊	2014-03-13	2014-03-18	5	阴性	2014-03-16	湖北省武汉市江汉区	武汉市江汉区疾病预防控制中心	湖北省武汉市江汉区	武汉市江汉区疾病预防控制中心			2014-03-21 09	继发	病原学阳性		刘小玉	2014-03-21	新患者	初治		2014-03-21							治疗	湖北省武汉市江汉区	江汉区民权街社区卫生服务中心		治愈
		1181	普通病案	湖北省武汉市硚口区	武汉市结核病防治所	湖北省武汉市硚口区	武汉市结核病防治所	420104019-2014-00115	1181	25	男性	汉族	学生	本县区	420104005		转诊	2014-02-20	2014-03-20	28	阴性	2014-03-21	湖北省武汉市硚口区	武汉市结核病防治所	湖北省武汉市硚口区	武汉市结核病防治所			2014-03-21 09	继发	病原学阴性		张军	2014-03-21	新患者	初治		2014-03-21							治疗	湖北省武汉市硚口区	武汉市结核病防治所		完成疗程
		1182	普通病案	湖北省武汉市洪山区	洪山区疾病预防控制中心	湖北省武汉市洪山区	洪山区疾病预防控制中心	420111016-2014-00147	1182	21	男性	汉族	学生	本县区	420111007		直接就诊	2014-03-19	2014-03-24	5	阴性	2014-03-24	湖北省武汉市洪山区	洪山区疾病预防控制中心	湖北省武汉市洪山区	洪山区疾病预防控制中心			2014-03-24 15	继发	病原学阴性		朱国强	2014-03-24	新患者	初治		2014-03-24							治疗	湖北省武汉市洪山区	洪山区洪山街社区卫生服务中心		完成疗程
		1183	普通病案	湖北省武汉市洪山区	洪山区疾病预防控制中心	湖北省武汉市洪山区	洪山区疾病预防控制中心	420111016-2014-00146	1183	25	女性	汉族	学生	本县区	420111003		转诊	2014-03-04	2014-03-24	20	阴性	2014-03-24	湖北省武汉市洪山区	洪山区疾病预防控制中心	湖北省武汉市洪山区	洪山区疾病预防控制中心			2014-03-24 14	继发	病原学阳性		朱国强	2014-03-24	新患者	初治		2014-03-24							治疗	湖北省武汉市洪山区	洪山区狮子山街华中农业大学医院		治愈
		1184	普通病案	湖北省武汉市汉阳区	武汉市汉阳区结核病防治所	湖北省武汉市汉阳区	武汉市汉阳区结核病防治所	420105012-2014-00077	1184	16	男性	汉族	学生	本县区	420105009		转诊	2014-03-11	2014-03-19	8	阴性	2014-03-25	湖北省武汉市汉阳区	武汉市汉阳区结核病防治所	湖北省武汉市汉阳区	武汉市汉阳区结核病防治所			2014-03-25 10	继发	病原学阴性		王长武	2014-03-25	新患者	初治	2014-05-23	2014-03-25							治疗	湖北省武汉市汉阳区	武汉市汉阳区二桥街社区卫生服务中心		完成疗程
		1185	普通病案	湖北省武汉市汉南区	武汉市汉南区疾病预防控制中心	湖北省武汉市汉南区	武汉市汉南区疾病预防控制中心	420113006-2014-02009	1185	20	女性	汉族	学生	本县区	420113096		转诊	2014-02-27	2014-03-05	6	阴性	2014-03-12	湖北省武汉市汉南区	武汉市汉南区疾病预防控制中心	湖北省武汉市汉南区	武汉市汉南区疾病预防控制中心			2014-03-25 09	继发	病原学阴性		聂绪军	2014-03-25	新患者	初治	2014-05-12	2014-03-25							治疗				完成疗程
		1186	普通病案	湖北省武汉市洪山区	洪山区疾病预防控制中心	湖北省武汉市洪山区	洪山区疾病预防控制中心	420111016-2014-00152	1186	24	男性	汉族	学生	本县区	420111002		转诊	2014-03-06	2014-03-25	19	阴性	2014-03-25	湖北省武汉市洪山区	洪山区疾病预防控制中心	湖北省武汉市洪山区	洪山区疾病预防控制中心			2014-03-25 10	继发	病原学阳性		朱国强	2014-03-25	新患者	初治		2014-03-25							治疗	湖北省武汉市洪山区	洪山区关山街华中科技大学医院		治愈
		1187	普通病案	湖北省武汉市江夏区	武汉市江夏区疾病预防控制中心	湖北省武汉市江夏区	武汉市江夏区疾病预防控制中心	420115008-2014-00116	1187	19	女性	汉族	学生	本县区	420115001		追踪	2014-02-06	2014-03-24	46	阴性	2014-03-26	湖北省武汉市江夏区	武汉市江夏区疾病预防控制中心	湖北省武汉市江夏区	武汉市江夏区疾病预防控制中心			2014-03-26 09	继发	病原学阴性		田晓春	2014-03-26	新患者	初治	2014-05-26	2014-03-26							治疗	湖北省武汉市江夏区	武汉市江夏区纸坊社区卫生服务中心		完成疗程
		1188	普通病案	湖北省武汉市洪山区	洪山区疾病预防控制中心	湖北省武汉市洪山区	洪山区疾病预防控制中心	420111016-2014-00156	1188	22	男性	汉族	学生	本县区	420111002		转诊	2014-03-20	2014-03-24	4	阴性	2014-03-26	湖北省武汉市洪山区	洪山区疾病预防控制中心	湖北省武汉市洪山区	洪山区疾病预防控制中心			2014-03-26 09	继发	病原学阴性		朱国强	2014-03-26	新患者	初治		2014-03-26							治疗	湖北省武汉市洪山区	洪山区关山街华中科技大学医院		完成疗程
		1189	普通病案	湖北省武汉市江汉区	武汉市江汉区疾病预防控制中心	湖北省武汉市江汉区	武汉市江汉区疾病预防控制中心	420103013-2014-00088	1189	17	男性	汉族	学生	本县区	420103013		转诊	2014-03-17	2014-03-21	4	阴性	2014-03-21	湖北省武汉市江汉区	武汉市江汉区疾病预防控制中心	湖北省武汉市江汉区	武汉市江汉区疾病预防控制中心			2014-03-27 09	继发	病原学阳性		万建侠连展	2014-03-27	新患者	初治		2014-03-27							治疗	湖北省武汉市江汉区	江汉区汉兴街社区卫生服务中心		治愈
		1190	普通病案	湖北省武汉市黄陂区	武汉市黄陂区疾病预防控制中心	湖北省武汉市黄陂区	武汉市黄陂区疾病预防控制中心	420116003-2014-00228	1190	16	男性	汉族	学生	本县区	420116001		转诊	2014-03-15	2014-03-26	11			湖北省武汉市黄陂区	武汉市黄陂区疾病预防控制中心	湖北省武汉市黄陂区	武汉市黄陂区疾病预防控制中心			2014-03-27 10	继发	病原学阳性		汪亮	2014-03-27	新患者	初治		2014-03-27							治疗	湖北省武汉市黄陂区	武汉市黄陂区前川街道卫生院		治愈
		1191	普通病案	湖北省武汉市汉南区	武汉市汉南区疾病预防控制中心	湖北省武汉市汉南区	武汉市汉南区疾病预防控制中心	420113006-2014-00020	1191	15	男性	汉族	学生	本县区	420113001		转诊	2014-03-16	2014-03-20	4	阴性	2014-03-27	湖北省武汉市汉南区	武汉市汉南区疾病预防控制中心	湖北省武汉市汉南区	武汉市汉南区疾病预防控制中心			2014-03-27 16	继发	病原学阴性		秦仁浩	2014-03-27	新患者	初治	2014-04-29	2014-03-27							治疗	湖北省武汉市汉南区	武汉市汉南区人民医院		完成疗程
		1192	普通病案	湖北省武汉市武昌区	武昌区疾病预防控制中心	湖北省武汉市武昌区	武昌区疾病预防控制中心	420106010-2014-00179	1192	16	男性	汉族	学生	本县区	420106002		转诊	2014-03-21	2014-03-21	0	阴性	2014-03-28	湖北省武汉市武昌区	武昌区疾病预防控制中心	湖北省武汉市武昌区	武昌区疾病预防控制中心			2014-03-28 11	继发	病原学阴性		刘文	2014-03-28	新患者	初治		2014-03-28							治疗				完成疗程
		1193	普通病案	湖北省武汉市武昌区	武昌区疾病预防控制中心	湖北省武汉市武昌区	武昌区疾病预防控制中心	420106010-2014-00173	1193	20	女性	汉族	学生	本县区	420106005		直接就诊	2014-03-21	2014-03-28	7	阴性	2014-03-28	湖北省武汉市武昌区	武昌区疾病预防控制中心	湖北省武汉市武昌区	武昌区疾病预防控制中心			2014-03-28 14	继发	病原学阳性		刘文	2014-03-28	新患者	初治		2014-03-28							治疗				治愈
		1194	普通病案	湖北省武汉市东西湖区	东西湖区结核病防治所	湖北省武汉市东西湖区	东西湖区结核病防治所	420112019-2014-00049	1194	18	男性	汉族	学生	本市其它县区	420112400		追踪	2014-01-08	2014-02-12	35	阴性	2014-03-28	湖北省武汉市东西湖区	东西湖区结核病防治所	湖北省武汉市东西湖区	东西湖区结核病防治所			2014-03-28 09	继发	病原学阳性		孟刚	2014-03-28	新患者	初治		2014-03-28							治疗	湖北省武汉市东西湖区	常青花园社区卫生服务中心		治愈
		1195	普通病案	湖北省武汉市江汉区	武汉市江汉区疾病预防控制中心	湖北省武汉市江汉区	武汉市江汉区疾病预防控制中心	420103013-2014-00094	1195	20	男性	汉族	学生	本县区	420103005		追踪	2014-03-13	2014-03-14	1	阴性	2014-03-14	湖北省武汉市江汉区	武汉市江汉区疾病预防控制中心	湖北省武汉市江汉区	武汉市江汉区疾病预防控制中心			2014-03-31 10	血行播散	病原学阳性		连展	2014-03-31	新患者	初治		2014-03-31							治疗	湖北省武汉市江汉区	江汉区满春街社区卫生服务中心		治愈
		1196	普通病案	湖北省武汉市东西湖区	东西湖区结核病防治所	湖北省武汉市东西湖区	东西湖区结核病防治所	420112019-2014-00052	1196	21	男性	汉族	学生	本县区	420112004		转诊	2014-01-06	2014-03-08	61	阴性	2014-03-31	湖北省武汉市东西湖区	东西湖区结核病防治所	湖北省武汉市东西湖区	东西湖区结核病防治所			2014-03-31 17	继发	病原学阳性		孟刚	2014-03-31	新患者	初治		2014-03-31							治疗	湖北省武汉市东西湖区	东西湖区将军路街卫生院		治愈
		1197	普通病案	湖北省武汉市洪山区	洪山区疾病预防控制中心	湖北省武汉市洪山区	洪山区疾病预防控制中心	420111016-2014-00168	1197	18	男性	汉族	学生	本县区	420111002		转诊	2014-03-01	2014-03-31	30	阴性	2014-04-01	湖北省武汉市洪山区	洪山区疾病预防控制中心	湖北省武汉市洪山区	洪山区疾病预防控制中心			2014-04-01 09	继发	病原学阴性		朱国强	2014-04-01	新患者	初治		2014-04-01							治疗	湖北省武汉市洪山区	洪山区关山街华中科技大学医院		完成疗程
		1198	普通病案	湖北省武汉市洪山区	洪山区疾病预防控制中心	湖北省武汉市洪山区	洪山区疾病预防控制中心	420111016-2014-00163	1198	25	女性	汉族	学生	本县区	420111001		转诊	2014-03-27	2014-03-29	2	阴性	2014-04-01	湖北省武汉市洪山区	洪山区疾病预防控制中心	湖北省武汉市洪山区	洪山区疾病预防控制中心			2014-04-01 09	继发	病原学阴性		朱国强	2014-04-01	新患者	初治		2014-04-01							治疗	湖北省武汉市洪山区	洪山区珞南街华中师范大学医院		完成疗程
		1199	普通病案	湖北省武汉市洪山区	洪山区疾病预防控制中心	湖北省武汉市洪山区	洪山区疾病预防控制中心	420111016-2014-00159	1199	23	女性	汉族	学生	本县区	420111001		转诊	2014-03-24	2014-03-25	1	阴性	2014-04-01	湖北省武汉市洪山区	洪山区疾病预防控制中心	湖北省武汉市洪山区	洪山区疾病预防控制中心			2014-04-01 10	继发	病原学阴性		朱国强	2014-04-01	新患者	初治		2014-04-01							治疗	湖北省武汉市洪山区	洪山区珞南街华中师范大学医院		完成疗程
		1200	普通病案	湖北省武汉市洪山区	洪山区疾病预防控制中心	湖北省武汉市洪山区	洪山区疾病预防控制中心	420111016-2014-00171	1200	20	男性	汉族	学生	本县区	420111011		转诊	2014-03-24	2014-03-27	3	阴性	2014-04-01	湖北省武汉市洪山区	洪山区疾病预防控制中心	湖北省武汉市洪山区	洪山区疾病预防控制中心			2014-04-01 10	继发	病原学阳性		朱国强	2014-04-01	新患者	初治		2014-04-01							治疗	湖北省武汉市洪山区	武汉市洪山区张家湾街社区卫生中心		治愈
		1201	普通病案	湖北省武汉市洪山区	洪山区疾病预防控制中心	湖北省武汉市洪山区	洪山区疾病预防控制中心	420111016-2014-00160	1201	20	男性	汉族	学生	本县区	420111011		转诊	2014-03-01	2014-03-27	26	阴性	2014-04-01	湖北省武汉市洪山区	洪山区疾病预防控制中心	湖北省武汉市洪山区	洪山区疾病预防控制中心			2014-04-01 10	继发	病原学阴性		朱国强	2014-04-01	新患者	初治		2014-04-01							治疗	湖北省武汉市洪山区	武汉市洪山区张家湾街社区卫生中心		完成疗程
		1202	普通病案	湖北省武汉市洪山区	洪山区疾病预防控制中心	湖北省武汉市洪山区	洪山区疾病预防控制中心	420111016-2014-00170	1202	24	男性	汉族	学生	本县区	420111006		转诊	2014-03-26	2014-03-29	3	阴性	2014-04-01	湖北省武汉市洪山区	洪山区疾病预防控制中心	湖北省武汉市洪山区	洪山区疾病预防控制中心			2014-04-01 08	继发	病原学阴性		朱国强	2014-04-01	新患者	初治		2014-04-01							治疗	湖北省武汉市洪山区	洪山区疾病预防控制中心		完成疗程
		1203	普通病案	湖北省武汉市黄陂区	武汉市黄陂区疾病预防控制中心	湖北省武汉市黄陂区	武汉市黄陂区疾病预防控制中心	420116003-2014-00234	1203	18	女性	汉族	学生	本县区	420116001		转诊	2014-03-11	2014-03-18	7			湖北省武汉市黄陂区	武汉市黄陂区疾病预防控制中心	湖北省武汉市黄陂区	武汉市黄陂区疾病预防控制中心			2014-04-02 10	继发	病原学阴性		汪亮	2014-04-02	新患者	初治		2014-04-02							治疗	湖北省武汉市黄陂区	武汉市黄陂区前川街道卫生院		完成疗程
		1204	普通病案	湖北省武汉市硚口区	武汉市结核病防治所	湖北省武汉市硚口区	武汉市结核病防治所	420104019-2014-00125	1204	17	女性	汉族	学生	本县区	420104005		追踪	2014-03-24	2014-03-31	7	阴性	2014-04-02	湖北省武汉市硚口区	武汉市结核病防治所	湖北省武汉市硚口区	武汉市结核病防治所			2014-04-02 09	继发	病原学阴性		骆燕琳	2014-04-02	新患者	初治		2014-04-02							治疗	湖北省武汉市硚口区	武汉市结核病防治所		完成疗程
		1205	普通病案	湖北省武汉市武昌区	武昌区疾病预防控制中心	湖北省武汉市武昌区	武昌区疾病预防控制中心	420106010-2014-00183	1205	19	男性	汉族	学生	本县区	420106011		直接就诊	2014-03-30	2014-04-04	5	阴性	2014-04-04	湖北省武汉市武昌区	武昌区疾病预防控制中心	湖北省武汉市武昌区	武昌区疾病预防控制中心			2014-04-04 14	继发	病原学阴性		刘文	2014-04-04	新患者	初治		2014-04-04							治疗				完成疗程
		1206	普通病案	湖北省武汉市黄陂区	武汉市黄陂区疾病预防控制中心	湖北省武汉市黄陂区	武汉市黄陂区疾病预防控制中心	420116003-2014-00252	1206	18	女性	汉族	学生	本县区	420116001		转诊	2014-03-30	2014-04-06	7			湖北省武汉市黄陂区	武汉市黄陂区疾病预防控制中心	湖北省武汉市黄陂区	武汉市黄陂区疾病预防控制中心			2014-04-07 10	继发	病原学阴性		汪亮	2014-04-07	新患者	初治		2014-04-07							治疗	湖北省武汉市黄陂区	武汉市黄陂区前川街道卫生院		完成疗程
		1207	普通病案	湖北省武汉市武昌区	武昌区疾病预防控制中心	湖北省武汉市武昌区	武昌区疾病预防控制中心	420106010-2014-00199	1207	24	女性	汉族	学生	本县区	420106011		直接就诊	2014-03-31	2014-04-08	8	阴性	2014-04-08	湖北省武汉市武昌区	武昌区疾病预防控制中心	湖北省武汉市武昌区	武昌区疾病预防控制中心			2014-04-08 14	继发	病原学阴性		刘文	2014-04-08	新患者	初治		2014-04-08							治疗				丢失
		1208	普通病案	湖北省武汉市武昌区	武昌区疾病预防控制中心	湖北省武汉市武昌区	武昌区疾病预防控制中心	420106010-2014-00196	1208	18	女性	汉族	学生	本市其它县区	420106003		转诊	2014-03-19	2014-03-23	4	阴性	2014-04-08	湖北省武汉市武昌区	武昌区疾病预防控制中心	湖北省武汉市武昌区	武昌区疾病预防控制中心			2014-04-08 14	继发	病原学阴性		刘文	2014-04-08	新患者	初治		2014-04-08							治疗				完成疗程
		1209	普通病案	湖北省武汉市江夏区	武汉市江夏区疾病预防控制中心	湖北省武汉市江夏区	武汉市江夏区疾病预防控制中心	420115008-2014-00137	1209	19	女性	汉族	学生	本县区	420115005		转诊	2014-03-21	2014-03-26	5	阴性	2014-03-28	湖北省武汉市江夏区	武汉市江夏区疾病预防控制中心	湖北省武汉市江夏区	武汉市江夏区疾病预防控制中心			2014-04-08 08	继发	病原学阴性		田晓春	2014-04-08	新患者	初治	2014-06-08	2014-04-08							治疗	湖北省武汉市江夏区	武汉市江夏区纸坊社区卫生服务中心		完成疗程
		1210	普通病案	湖北省武汉市洪山区	洪山区疾病预防控制中心	湖北省武汉市洪山区	洪山区疾病预防控制中心	420111016-2014-00179	1210	20	男性	汉族	学生	本县区	420111002		转诊	2014-04-02	2014-04-04	2	阴性	2014-04-08	湖北省武汉市洪山区	洪山区疾病预防控制中心	湖北省武汉市洪山区	洪山区疾病预防控制中心			2014-04-08 09	继发	病原学阴性		朱国强	2014-04-08	新患者	初治		2014-04-08							治疗	湖北省武汉市洪山区	中国地质大学医院		完成疗程
		1211	普通病案	湖北省武汉市洪山区	洪山区疾病预防控制中心	湖北省武汉市洪山区	洪山区疾病预防控制中心	420111016-2014-00185	1211	22	男性	汉族	学生	本县区	420111002		转诊	2014-04-01	2014-04-08	7	阴性	2014-04-08	湖北省武汉市洪山区	洪山区疾病预防控制中心	湖北省武汉市洪山区	洪山区疾病预防控制中心			2014-04-08 09	继发	病原学阴性		朱国强	2014-04-08	新患者	初治		2014-04-08							治疗	湖北省武汉市洪山区	中国地质大学医院		完成疗程
		1212	普通病案	湖北省武汉市洪山区	洪山区疾病预防控制中心	湖北省武汉市洪山区	洪山区疾病预防控制中心	420111016-2014-00184	1212	19	女性	汉族	学生	本县区	420111003		转诊	2014-03-14	2014-04-08	25	阴性	2014-04-08	湖北省武汉市洪山区	洪山区疾病预防控制中心	湖北省武汉市洪山区	洪山区疾病预防控制中心			2014-04-08 09	继发	病原学阴性		朱国强	2014-04-08	新患者	初治		2014-04-08							治疗	湖北省武汉市洪山区	湖北工业大学医院		完成疗程
		1213	普通病案	湖北省武汉市洪山区	洪山区疾病预防控制中心	湖北省武汉市洪山区	洪山区疾病预防控制中心	420111016-2014-00177	1213	21	男性	汉族	学生	本县区	420111011		转诊	2014-03-28	2014-04-01	4	阴性	2014-04-08	湖北省武汉市洪山区	洪山区疾病预防控制中心	湖北省武汉市洪山区	洪山区疾病预防控制中心			2014-04-08 10	继发	病原学阴性		朱国强	2014-04-08	新患者	初治		2014-04-08							治疗	湖北省武汉市洪山区	武汉市洪山区张家湾街社区卫生中心		完成疗程
		1214	普通病案	湖北省武汉市东湖高新技术开发区	武汉东湖新技术开发区佛祖岭社区卫生服务中心	湖北省武汉市东湖高新技术开发区	武汉东湖新技术开发区佛祖岭社区卫生服务中心	420192011-2014-01042	1214	18	女性	汉族	学生	本市其它县区	420192002		转诊	2014-02-10	2014-04-09	58			湖北省武汉市东湖高新技术开发区	武汉东湖新技术开发区佛祖岭社区卫生服务中心	湖北省武汉市东湖高新技术开发区	武汉东湖新技术开发区佛祖岭社区卫生服务中心			2014-04-09 14	继发	病原学阴性		邱宏	2014-04-09	新患者	初治		2014-04-09							治疗	湖北省武汉市东湖高新技术开发区	武汉东湖新技术开发区佛祖岭社区卫生服务中心		完成疗程
		1215	普通病案	湖北省武汉市青山区	青山区结核病防治所	湖北省武汉市青山区	青山区结核病防治所	420107018-2014-00064	1215	23	女性	汉族	学生	本市其它县区	420107001		转诊	2014-03-24	2014-03-27	3	阴性	2014-04-09	湖北省武汉市青山区	青山区结核病防治所	湖北省武汉市青山区	青山区结核病防治所			2014-04-09 14	继发	病原学阴性		郑和平	2014-04-09	新患者	初治		2014-04-09							治疗	湖北省武汉市青山区	武汉市第九医院		完成疗程
		1216	普通病案	湖北省武汉市江岸区	江岸区疾病预防控制中心	湖北省武汉市江岸区	江岸区疾病预防控制中心	420102000-2014-00137	1216	18	男性	汉族	学生	本市其它县区	420102003		转诊	2014-03-27	2014-04-01	5	阴性	2014-03-27	湖北省武汉市江岸区	江岸区疾病预防控制中心	湖北省武汉市江岸区	江岸区疾病预防控制中心			2014-04-10 09	继发	病原学阴性		罗艺	2014-04-10	新患者	初治		2014-04-10							治疗	湖北省武汉市江岸区	江岸区一元街社区卫生服务中心		完成疗程
		1217	普通病案	湖北省武汉市武昌区	武昌区疾病预防控制中心	湖北省武汉市武昌区	武昌区疾病预防控制中心	420106010-2014-00204	1217	16	男性	汉族	学生	本县区	420106006		转诊	2014-04-01	2014-04-10	9	阴性	2014-04-11	湖北省武汉市武昌区	武昌区疾病预防控制中心	湖北省武汉市武昌区	武昌区疾病预防控制中心			2014-04-11 10	继发	病原学阴性		刘文	2014-04-11	新患者	初治		2014-04-11							治疗				完成疗程
		1218	普通病案	湖北省武汉市武昌区	武昌区疾病预防控制中心	湖北省武汉市武昌区	武昌区疾病预防控制中心	420106010-2014-00203	1218	17	女性	汉族	学生	本市其它县区	420106012		转诊	2014-03-20	2014-03-31	11	阴性	2014-04-11	湖北省武汉市武昌区	武昌区疾病预防控制中心	湖北省武汉市武昌区	武昌区疾病预防控制中心			2014-04-11 09	继发	病原学阴性		刘文	2014-04-11	新患者	初治		2014-04-11							治疗				完成疗程
		1219	普通病案	湖北省武汉市黄陂区	武汉市黄陂区疾病预防控制中心	湖北省武汉市黄陂区	武汉市黄陂区疾病预防控制中心	420116003-2014-00263	1219	16	男性	汉族	学生	本市其它县区	420116014		转诊	2014-03-24	2014-04-11	18			湖北省武汉市黄陂区	武汉市黄陂区疾病预防控制中心	湖北省武汉市黄陂区	武汉市黄陂区疾病预防控制中心			2014-04-11 10	继发	病原学阴性		汪亮	2014-04-11	新患者	初治		2014-04-11							治疗	湖北省武汉市黄陂区	武汉市黄陂区三里桥街道卫生院		完成疗程
		1220	普通病案	湖北省武汉市江岸区	江岸区疾病预防控制中心	湖北省武汉市江岸区	江岸区疾病预防控制中心	420102000-2014-00142	1220	25	男性	汉族	学生	本市其它县区	420102010		转诊	2014-01-31	2014-03-31	59	阴性	2014-03-31	湖北省武汉市江岸区	江岸区疾病预防控制中心	湖北省武汉市江岸区	江岸区疾病预防控制中心			2014-04-12 08	继发	病原学阳性		刘妍丽	2014-04-12	新患者	初治		2014-04-12							治疗	湖北省武汉市江岸区	江岸区二七街社区卫生服务中心		治愈
		1221	普通病案	湖北省武汉市洪山区	洪山区疾病预防控制中心	湖北省武汉市洪山区	洪山区疾病预防控制中心	420111016-2014-00186	1221	25	男性	汉族	学生	本县区	420111003		转诊	2014-03-26	2014-04-11	16	阴性	2014-04-14	湖北省武汉市洪山区	洪山区疾病预防控制中心	湖北省武汉市洪山区	洪山区疾病预防控制中心			2014-04-14 09	继发	病原学阴性		朱国强	2014-04-14	新患者	初治		2014-04-14							治疗	湖北省武汉市洪山区	洪山区狮子山街华中农业大学医院		完成疗程
		1222	普通病案	湖北省武汉市洪山区	洪山区疾病预防控制中心	湖北省武汉市洪山区	洪山区疾病预防控制中心	420111016-2014-00191	1222	22	女性	汉族	学生	本县区	420111002		转诊	2014-04-02	2014-04-08	6	阴性	2014-04-14	湖北省武汉市洪山区	洪山区疾病预防控制中心	湖北省武汉市洪山区	洪山区疾病预防控制中心			2014-04-14 08	继发	病原学阴性		朱国强	2014-04-14	新患者	初治		2014-04-14							治疗	湖北省武汉市洪山区	洪山区关山街华中科技大学医院		完成疗程
		1223	普通病案	湖北省武汉市洪山区	洪山区疾病预防控制中心	湖北省武汉市洪山区	洪山区疾病预防控制中心	420111016-2014-00187	1223	21	女性	汉族	学生	本县区	420111002		转诊	2014-03-29	2014-04-01	3	阴性	2014-04-14	湖北省武汉市洪山区	洪山区疾病预防控制中心	湖北省武汉市洪山区	洪山区疾病预防控制中心			2014-04-14 09	继发	病原学阳性		朱国强	2014-04-14	新患者	初治		2014-04-14							治疗	湖北省武汉市洪山区	洪山区疾病预防控制中心		治愈
		1224	普通病案	湖北省武汉市洪山区	洪山区疾病预防控制中心	湖北省武汉市洪山区	洪山区疾病预防控制中心	420111016-2014-00198	1224	20	男性	汉族	学生	本县区	420111002		转诊	2014-04-10	2014-04-11	1	阴性	2014-04-14	湖北省武汉市洪山区	洪山区疾病预防控制中心	湖北省武汉市洪山区	洪山区疾病预防控制中心			2014-04-14 10	继发	病原学阴性		朱国强	2014-04-14	新患者	初治		2014-04-14							治疗	湖北省武汉市洪山区	洪山区疾病预防控制中心		完成疗程
		1225	普通病案	湖北省武汉市武昌区	武昌区疾病预防控制中心	湖北省武汉市武昌区	武昌区疾病预防控制中心	420106010-2014-00217	1225	17	男性	汉族	学生	本县区	420106012		直接就诊	2014-04-08	2014-04-15	7	阴性	2014-04-15	湖北省武汉市武昌区	武昌区疾病预防控制中心	湖北省武汉市武昌区	武昌区疾病预防控制中心			2014-04-15 14	继发	病原学阴性		刘文	2014-04-15	新患者	初治		2014-04-15							治疗				完成疗程
		1226	普通病案	湖北省武汉市武昌区	武昌区疾病预防控制中心	湖北省武汉市武昌区	武昌区疾病预防控制中心	420106010-2014-00214	1226	18	女性	维吾尔族	学生	本市其它县区	420106011		转诊	2014-04-01	2014-04-11	10	阴性	2014-04-15	湖北省武汉市武昌区	武昌区疾病预防控制中心	湖北省武汉市武昌区	武昌区疾病预防控制中心			2014-04-15 14	继发	病原学阳性		刘文	2014-04-15	新患者	初治		2014-04-15							治疗				丢失
		1227	普通病案	湖北省武汉市武昌区	武昌区疾病预防控制中心	湖北省武汉市武昌区	武昌区疾病预防控制中心	420106010-2014-00219	1227	22	男性	汉族	学生	本县区	420106013		转诊	2014-03-31	2014-04-01	1	阴性	2014-04-15	湖北省武汉市武昌区	武昌区疾病预防控制中心	湖北省武汉市武昌区	武昌区疾病预防控制中心			2014-04-15 11	继发	病原学阴性		刘文	2014-04-15	新患者	初治		2014-04-15							治疗				完成疗程
		1228	普通病案	湖北省武汉市洪山区	洪山区疾病预防控制中心	湖北省武汉市洪山区	洪山区疾病预防控制中心	420111016-2014-00199	1228	19	男性	汉族	学生	本县区	420111007		直接就诊	2014-04-04	2014-04-10	6	阴性	2014-04-15	湖北省武汉市洪山区	洪山区疾病预防控制中心	湖北省武汉市洪山区	洪山区疾病预防控制中心			2014-04-15 09	继发	病原学阴性		朱国强	2014-04-15	新患者	初治		2014-04-15							治疗	湖北省武汉市洪山区	洪山区洪山街社区卫生服务中心		完成疗程
		1229	普通病案	湖北省武汉市江岸区	江岸区疾病预防控制中心	湖北省武汉市江岸区	江岸区疾病预防控制中心	420102000-2014-00148	1229	17	男性	汉族	学生	本市其它县区	420102006		转诊	2014-03-17	2014-03-30	13	阴性	2014-03-30	湖北省武汉市江岸区	江岸区疾病预防控制中心	湖北省武汉市江岸区	江岸区疾病预防控制中心			2014-04-16 14	继发	病原学阴性		孙学智	2014-04-16	新患者	初治		2014-04-16							治疗	湖北省武汉市江岸区	江岸区永清街社区卫生服务中心		完成疗程
		1230	普通病案	湖北省武汉市汉阳区	武汉市汉阳区结核病防治所	湖北省武汉市汉阳区	武汉市汉阳区结核病防治所	420105012-2014-00095	1230	18	男性	汉族	学生	本县区	420105011		转诊	2014-04-01	2014-04-10	9	阴性	2014-04-15	湖北省武汉市汉阳区	武汉市汉阳区结核病防治所	湖北省武汉市汉阳区	武汉市汉阳区结核病防治所			2014-04-16 08	继发	病原学阴性		王长武	2014-04-16	新患者	初治	2014-06-13	2014-04-16							治疗	湖北省武汉市汉阳区	武汉市汉阳区江堤街社区卫生服务中心		完成疗程
		1231	普通病案	湖北省武汉市江夏区	武汉市江夏区疾病预防控制中心	湖北省武汉市江夏区	武汉市江夏区疾病预防控制中心	420115008-2014-00149	1231	22	女性	土家族	学生	本县区	420115010		转诊	2014-03-20	2014-04-08	19	阴性	2014-04-02	湖北省武汉市江夏区	武汉市江夏区疾病预防控制中心	湖北省武汉市江夏区	武汉市江夏区疾病预防控制中心			2014-04-16 17	继发	病原学阴性		田晓春	2014-04-17	新患者	初治	2014-04-16	2014-04-17							治疗	湖北省武汉市江夏区	藏龙岛经院社区卫生服务中心		完成疗程
		1232	普通病案	湖北省武汉市江夏区	武汉市江夏区疾病预防控制中心	湖北省武汉市江夏区	武汉市江夏区疾病预防控制中心	420115008-2014-00150	1232	17	男性	汉族	学生	本县区	420115002		转诊	2014-02-21	2014-03-21	28	阴性	2014-03-22	湖北省武汉市江夏区	武汉市江夏区疾病预防控制中心	湖北省武汉市江夏区	武汉市江夏区疾病预防控制中心			2014-04-16 15	继发	病原学阳性		田晓春	2014-04-17	新患者	初治	2014-04-17	2014-04-17							治疗	湖北省武汉市江夏区	武汉市江夏区金口社区卫生服务中心		治愈
		1233	普通病案	湖北省武汉市武昌区	武昌区疾病预防控制中心	湖北省武汉市武昌区	武昌区疾病预防控制中心	420106010-2014-00226	1233	21	男性	汉族	学生	本县区	420106002		转诊	2014-04-14	2014-04-14	0	阴性	2014-04-18	湖北省武汉市武昌区	武昌区疾病预防控制中心	湖北省武汉市武昌区	武昌区疾病预防控制中心			2014-04-18 11	继发	病原学阴性		刘文	2014-04-18	新患者	初治		2014-04-18							治疗				完成疗程
		1234	普通病案	湖北省武汉市江汉区	武汉市江汉区疾病预防控制中心	湖北省武汉市江汉区	武汉市江汉区疾病预防控制中心	420103013-2014-00114	1234	15	女性	汉族	学生	本县区	420103005		转诊	2014-04-13	2014-04-15	2	阴性	2014-04-16	湖北省武汉市江汉区	武汉市江汉区疾病预防控制中心	湖北省武汉市江汉区	武汉市江汉区疾病预防控制中心			2014-04-21 08	继发	病原学阳性		杜鹃	2014-04-21	新患者	初治		2014-04-21							治疗	湖北省武汉市江汉区	江汉区满春街社区卫生服务中心		治愈
		1235	普通病案	湖北省武汉市洪山区	洪山区疾病预防控制中心	湖北省武汉市洪山区	洪山区疾病预防控制中心	420111016-2014-00202	1235	22	男性	汉族	学生	本县区	420111001		转诊	2014-04-08	2014-04-15	7	阴性	2014-04-21	湖北省武汉市洪山区	洪山区疾病预防控制中心	湖北省武汉市洪山区	洪山区疾病预防控制中心			2014-04-21 10	继发	病原学阴性		朱国强	2014-04-21	新患者	初治		2014-04-21							治疗	湖北省武汉市洪山区	洪山区珞南街理工大社区卫生服务中心		完成疗程
		1236	普通病案	湖北省武汉市洪山区	洪山区疾病预防控制中心	湖北省武汉市洪山区	洪山区疾病预防控制中心	420111016-2014-00205	1236	25	女性	汉族	学生	本县区	420111002		转诊	2014-04-09	2014-04-17	8	阴性	2014-04-21	湖北省武汉市洪山区	洪山区疾病预防控制中心	湖北省武汉市洪山区	洪山区疾病预防控制中心			2014-04-21 10	继发	病原学阴性		朱国强	2014-04-21	新患者	初治		2014-04-21							治疗	湖北省武汉市洪山区	中国地质大学医院		完成疗程
		1237	普通病案	湖北省武汉市汉南区	武汉市汉南区疾病预防控制中心	湖北省武汉市汉南区	武汉市汉南区疾病预防控制中心	420113006-2014-03012	1237	21	男性	汉族	学生	本市其它县区	420113096		转诊	2014-04-04	2014-04-07	3	阴性	2014-04-04	湖北省武汉市汉南区	武汉市汉南区疾病预防控制中心	湖北省武汉市汉南区	武汉市汉南区疾病预防控制中心			2014-04-21 14	继发	病原学阳性		李晟	2014-04-21	新患者	初治		2014-04-21							治疗	湖北省武汉市汉南区	武汉市汉南区疾病预防控制中心		治愈
		1238	普通病案	湖北省武汉市洪山区	洪山区疾病预防控制中心	湖北省武汉市洪山区	洪山区疾病预防控制中心	420111016-2014-00204	1238	19	男性	汉族	学生	本县区	420111003		转诊	2014-04-13	2014-04-17	4	阴性	2014-04-21	湖北省武汉市洪山区	洪山区疾病预防控制中心	湖北省武汉市洪山区	洪山区疾病预防控制中心			2014-04-21 10	继发	病原学阳性		朱国强	2014-04-21	新患者	初治		2014-04-21							治疗	湖北省武汉市洪山区	湖北工业大学医院		治愈
		1239	普通病案	湖北省武汉市洪山区	洪山区疾病预防控制中心	湖北省武汉市洪山区	洪山区疾病预防控制中心	420111016-2014-00201	1239	21	男性	汉族	学生	本县区	420111003		转诊	2014-04-01	2014-04-14	13	阴性	2014-04-21	湖北省武汉市洪山区	洪山区疾病预防控制中心	湖北省武汉市洪山区	洪山区疾病预防控制中心			2014-04-21 09	继发	病原学阴性		朱国强	2014-04-21	新患者	初治		2014-04-21							治疗	湖北省武汉市洪山区	湖北工业大学医院		完成疗程
		1240	普通病案	湖北省武汉市武昌区	武昌区疾病预防控制中心	湖北省武汉市武昌区	武昌区疾病预防控制中心	420106010-2014-00229	1240	20	男性	汉族	学生	本县区	420106001		直接就诊	2014-04-14	2014-04-22	8	阴性	2014-04-22	湖北省武汉市武昌区	武昌区疾病预防控制中心	湖北省武汉市武昌区	武昌区疾病预防控制中心			2014-04-22 14	继发	病原学阴性		刘文	2014-04-22	新患者	初治		2014-04-22							治疗				完成疗程
		1241	普通病案	湖北省武汉市江岸区	江岸区疾病预防控制中心	湖北省武汉市江岸区	江岸区疾病预防控制中心	420102000-2014-00157	1241	14	女性	汉族	学生	本市其它县区	420102017		转诊	2014-04-06	2014-04-11	5	阴性	2014-04-11	湖北省武汉市江岸区	江岸区疾病预防控制中心	湖北省武汉市江岸区	江岸区疾病预防控制中心			2014-04-22 08	继发	病原学阴性		曾洁	2014-04-22	新患者	初治		2014-04-22							治疗	湖北省武汉市江岸区	江岸区后湖街金桥社区卫生服务中心		完成疗程
		1242	普通病案	湖北省武汉市汉阳区	武汉市汉阳区结核病防治所	湖北省武汉市汉阳区	武汉市汉阳区结核病防治所	420105012-2014-00098	1242	21	男性	汉族	学生	本县区	420105009		转诊	2014-03-22	2014-03-23	1	阴性	2014-03-28	湖北省武汉市汉阳区	武汉市汉阳区结核病防治所	湖北省武汉市汉阳区	武汉市汉阳区结核病防治所			2014-04-22 14	继发	病原学阳性		朱建	2014-04-22	新患者	初治	2014-05-28	2014-04-22							治疗	湖北省武汉市汉阳区	武汉市汉阳区二桥街社区卫生服务中心		治愈
		1243	普通病案	湖北省武汉市洪山区	洪山区疾病预防控制中心	湖北省武汉市洪山区	洪山区疾病预防控制中心	420111016-2014-00209	1243	24	女性	汉族	学生	本县区	420111002		转诊	2014-04-17	2014-04-20	3	阴性	2014-04-22	湖北省武汉市洪山区	洪山区疾病预防控制中心	湖北省武汉市洪山区	洪山区疾病预防控制中心			2014-04-22 09	继发	病原学阴性		朱国强	2014-04-22	新患者	初治		2014-04-22							治疗	湖北省武汉市洪山区	洪山区疾病预防控制中心		完成疗程
		1244	普通病案	湖北省武汉市洪山区	洪山区疾病预防控制中心	湖北省武汉市洪山区	洪山区疾病预防控制中心	420111016-2014-00206	1244	24	男性	汉族	学生	本县区	420111011		转诊	2014-04-04	2014-04-20	16	阴性	2014-04-22	湖北省武汉市洪山区	洪山区疾病预防控制中心	湖北省武汉市洪山区	洪山区疾病预防控制中心			2014-04-22 09	继发	病原学阳性		朱国强	2014-04-22	新患者	初治		2014-04-22							治疗	湖北省武汉市洪山区	武汉市洪山区张家湾街社区卫生中心		治愈
		1245	普通病案	湖北省武汉市江夏区	武汉市江夏区疾病预防控制中心	湖北省武汉市江夏区	武汉市江夏区疾病预防控制中心	420115008-2014-00169	1245	16	男性	汉族	学生	本县区	420115001		追踪	2014-02-13	2014-04-22	68	阴性	2014-04-22	湖北省武汉市江夏区	武汉市江夏区疾病预防控制中心	湖北省武汉市江夏区	武汉市江夏区疾病预防控制中心			2014-04-23 09	继发	病原学阴性		田晓春	2014-04-23	新患者	初治	2014-06-23	2014-04-23							治疗	湖北省武汉市江夏区	武汉市江夏区纸坊社区卫生服务中心		完成疗程
		1246	普通病案	湖北省武汉市江夏区	武汉市江夏区疾病预防控制中心	湖北省武汉市江夏区	武汉市江夏区疾病预防控制中心	420115008-2014-00171	1246	21	男性	汉族	学生	本县区	420115001		转诊	2014-03-13	2014-04-13	31	阴性	2014-04-16	湖北省武汉市江夏区	武汉市江夏区疾病预防控制中心	湖北省武汉市江夏区	武汉市江夏区疾病预防控制中心			2014-04-25 10	继发	病原学阳性		田晓春	2014-04-25	新患者	初治	2014-06-25	2014-04-25							治疗	湖北省武汉市江夏区	武汉市江夏区纸坊社区卫生服务中心		治愈
		1247	普通病案	湖北省武汉市洪山区	洪山区疾病预防控制中心	湖北省武汉市洪山区	洪山区疾病预防控制中心	420111016-2014-00212	1247	21	女性	汉族	学生	本县区	420111002		转诊	2014-04-10	2014-04-22	12	阴性	2014-04-25	湖北省武汉市洪山区	洪山区疾病预防控制中心	湖北省武汉市洪山区	洪山区疾病预防控制中心			2014-04-25 09	继发	病原学阴性		朱国强	2014-04-25	新患者	初治		2014-04-25							治疗	湖北省武汉市洪山区	洪山区疾病预防控制中心		完成疗程
		1248	普通病案	湖北省武汉市硚口区	武汉市结核病防治所	湖北省武汉市硚口区	武汉市结核病防治所	420104019-2014-00170	1248	14	男性	汉族	学生	本县区	420104011		追踪	2014-04-22	2014-04-27	5	阴性	2014-04-28	湖北省武汉市硚口区	武汉市结核病防治所	湖北省武汉市硚口区	武汉市结核病防治所			2014-04-28 00	继发	病原学阳性		连展	2014-04-28	新患者	初治		2014-04-28							治疗	湖北省武汉市硚口区	武汉市结核病防治所		治愈
		1249	普通病案	湖北省武汉市洪山区	洪山区疾病预防控制中心	湖北省武汉市洪山区	洪山区疾病预防控制中心	420111016-2014-00219	1249	20	男性	汉族	学生	本县区	420111002		转诊	2014-04-20	2014-04-24	4	阴性	2014-04-28	湖北省武汉市洪山区	洪山区疾病预防控制中心	湖北省武汉市洪山区	洪山区疾病预防控制中心			2014-04-28 09	继发	病原学阴性		朱国强	2014-04-28	新患者	初治		2014-04-28							治疗	湖北省武汉市洪山区	中国地质大学医院		完成疗程
		1250	普通病案	湖北省武汉市洪山区	洪山区疾病预防控制中心	湖北省武汉市洪山区	洪山区疾病预防控制中心	420111016-2014-00214	1250	22	男性	汉族	学生	本县区	420111002		转诊	2014-03-10	2014-04-24	45	阴性	2014-04-28	湖北省武汉市洪山区	洪山区疾病预防控制中心	湖北省武汉市洪山区	洪山区疾病预防控制中心			2014-04-28 09	继发	病原学阴性		朱国强	2014-04-28	新患者	初治		2014-04-28							治疗	湖北省武汉市洪山区	洪山区疾病预防控制中心		完成疗程
		1251	普通病案	湖北省武汉市洪山区	洪山区疾病预防控制中心	湖北省武汉市洪山区	洪山区疾病预防控制中心	420111016-2014-00218	1251	24	男性	汉族	学生	本县区	420111002		转诊	2014-03-02	2014-04-21	50	阴性	2014-04-28	湖北省武汉市洪山区	洪山区疾病预防控制中心	湖北省武汉市洪山区	洪山区疾病预防控制中心			2014-04-28 09	继发	病原学阴性		朱国强	2014-04-28	新患者	初治		2014-04-28							治疗	湖北省武汉市洪山区	洪山区关山街华中科技大学医院		完成疗程
		1252	普通病案	湖北省武汉市武昌区	武昌区疾病预防控制中心	湖北省武汉市武昌区	武昌区疾病预防控制中心	420106010-2014-00242	1252	18	男性	汉族	学生	本县区	420106003		转诊	2014-04-14	2014-04-17	3	阴性	2014-04-29	湖北省武汉市武昌区	武昌区疾病预防控制中心	湖北省武汉市武昌区	武昌区疾病预防控制中心			2014-04-29 10	继发	病原学阳性		刘文	2014-04-29	新患者	初治		2014-04-29							治疗				治愈
		1253	普通病案	湖北省武汉市新洲区	新洲区疾病预防控制中心	湖北省武汉市新洲区	新洲区疾病预防控制中心	420117002-2014-00174	1253	19	男性	汉族	学生	本县区	420117002		追踪	2014-03-18	2014-04-29	42			湖北省武汉市新洲区	新洲区疾病预防控制中心	湖北省武汉市新洲区	新洲区疾病预防控制中心			2014-04-29 00	继发	病原学阴性		邓其军	2014-04-29	新患者	初治		2014-04-29							治疗	湖北省武汉市新洲区	新洲区阳逻街卫生院		完成疗程
		1254	普通病案	湖北省武汉市东西湖区	东西湖区结核病防治所	湖北省武汉市东西湖区	东西湖区结核病防治所	420112019-2014-00068	1254	17	男性	汉族	学生	本市其它县区	420112014		追踪	2014-02-22	2014-02-28	6	阴性	2014-04-29	湖北省武汉市东西湖区	东西湖区结核病防治所	湖北省武汉市东西湖区	东西湖区结核病防治所			2014-04-29 16	继发	病原学阴性		孟刚	2014-04-29	新患者	初治		2014-04-29							治疗	湖北省武汉市东西湖区	东西湖区金银湖街卫生院		完成疗程
		1255	普通病案	湖北省武汉市东西湖区	东西湖区结核病防治所	湖北省武汉市东西湖区	东西湖区结核病防治所	420112019-2014-00070	1255	18	男性	汉族	学生	本市其它县区	420112014		追踪	2014-03-05	2014-03-24	19	阴性	2014-04-29	湖北省武汉市东西湖区	东西湖区结核病防治所	湖北省武汉市东西湖区	东西湖区结核病防治所			2014-04-29 15	继发	病原学阴性		孟刚	2014-04-29	新患者	初治		2014-04-29							治疗	湖北省武汉市东西湖区	东西湖区金银湖街卫生院		完成疗程
		1256	普通病案	湖北省武汉市东西湖区	东西湖区结核病防治所	湖北省武汉市东西湖区	东西湖区结核病防治所	420112019-2014-00071	1256	20	男性	汉族	学生	本市其它县区	420112400		追踪	2014-03-25	2014-03-27	2	阴性	2014-04-29	湖北省武汉市东西湖区	东西湖区结核病防治所	湖北省武汉市东西湖区	东西湖区结核病防治所			2014-04-29 16	继发	病原学阴性		孟刚	2014-04-29	新患者	初治		2014-04-29							治疗	湖北省武汉市东西湖区	常青花园社区卫生服务中心		完成疗程
		1257	普通病案	湖北省武汉市东西湖区	东西湖区结核病防治所	湖北省武汉市东西湖区	东西湖区结核病防治所	420112019-2014-00069	1257	18	男性	汉族	学生	本县区	420112014		追踪	2014-03-06	2014-03-07	1	阴性	2014-04-29	湖北省武汉市东西湖区	东西湖区结核病防治所	湖北省武汉市东西湖区	东西湖区结核病防治所			2014-04-29 16	继发	病原学阴性		孟刚	2014-04-29	新患者	初治		2014-04-29							治疗	湖北省武汉市东西湖区	东西湖区金银湖街卫生院		完成疗程
		1258	普通病案	湖北省武汉市洪山区	洪山区疾病预防控制中心	湖北省武汉市洪山区	洪山区疾病预防控制中心	420111016-2014-00226	1258	19	女性	汉族	学生	本县区	420111001		转诊	2014-02-12	2014-04-27	74	阴性	2014-05-04	湖北省武汉市洪山区	洪山区疾病预防控制中心	湖北省武汉市洪山区	洪山区疾病预防控制中心			2014-05-04 00	继发	病原学阴性		朱国强	2014-05-04	新患者	初治		2014-05-04							治疗	湖北省武汉市洪山区	洪山区珞南街华中师范大学医院		完成疗程
		1259	普通病案	湖北省武汉市洪山区	洪山区疾病预防控制中心	湖北省武汉市洪山区	洪山区疾病预防控制中心	420111016-2014-00224	1259	28	男性	汉族	学生	本县区	420111001		转诊	2014-04-24	2014-04-25	1	阴性	2014-05-04	湖北省武汉市洪山区	洪山区疾病预防控制中心	湖北省武汉市洪山区	洪山区疾病预防控制中心			2014-05-04 00	继发	病原学阴性		朱国强	2014-05-04	新患者	初治		2014-05-04							治疗	湖北省武汉市洪山区	武汉市洪山区张家湾街社区卫生中心		完成疗程
		1260	普通病案	湖北省武汉市黄陂区	武汉市黄陂区疾病预防控制中心	湖北省武汉市黄陂区	武汉市黄陂区疾病预防控制中心	420116003-2014-00324	1260	21	女性	汉族	学生	本县区	420116014		转诊	2014-04-21	2014-05-05	14			湖北省武汉市黄陂区	武汉市黄陂区疾病预防控制中心	湖北省武汉市黄陂区	武汉市黄陂区疾病预防控制中心			2014-05-05 10	继发	病原学阴性		汪亮	2014-05-05	新患者	初治		2014-05-05							治疗	湖北省武汉市黄陂区	武汉市黄陂区三里桥街道卫生院		完成疗程
		1261	普通病案	湖北省武汉市武昌区	武昌区疾病预防控制中心	湖北省武汉市武昌区	武昌区疾病预防控制中心	420106010-2014-00252	1261	19	男性	汉族	学生	本县区	420106002		转诊	2014-04-28	2014-04-28	0	阴性	2014-05-06	湖北省武汉市武昌区	武昌区疾病预防控制中心	湖北省武汉市武昌区	武昌区疾病预防控制中心			2014-05-06 00	继发	病原学阴性		刘文	2014-05-06	新患者	初治		2014-05-06							治疗				完成疗程
		1262	普通病案	湖北省武汉市武昌区	武昌区疾病预防控制中心	湖北省武汉市武昌区	武昌区疾病预防控制中心	420106010-2014-00249	1262	13	男性	汉族	学生	本市其它县区	420106011		转诊	2014-04-21	2014-04-23	2	阴性	2014-05-06	湖北省武汉市武昌区	武昌区疾病预防控制中心	湖北省武汉市武昌区	武昌区疾病预防控制中心			2014-05-06 00	继发	病原学阴性		刘文	2014-05-06	新患者	初治		2014-05-06							治疗				完成疗程
		1263	普通病案	湖北省武汉市汉阳区	武汉市汉阳区结核病防治所	湖北省武汉市汉阳区	武汉市汉阳区结核病防治所	420105012-2014-00119	1263	18	女性	汉族	学生	本县区	420105002		追踪	2014-03-12	2014-04-23	42	阴性	2014-04-18	湖北省武汉市汉阳区	武汉市汉阳区结核病防治所	湖北省武汉市汉阳区	武汉市汉阳区结核病防治所			2014-05-06 16	继发	病原学阳性		马莉	2014-05-06	新患者	初治	2014-06-18	2014-05-06							治疗	湖北省武汉市汉阳区	汉阳区四新街社区卫生服务中心		治愈
		1264	普通病案	湖北省武汉市江夏区	武汉市江夏区疾病预防控制中心	湖北省武汉市江夏区	武汉市江夏区疾病预防控制中心	420115008-2014-00177	1264	18	男性	汉族	学生	本县区	420115001		转诊	2014-04-20	2014-04-21	1	阴性	2014-05-23	湖北省武汉市江夏区	武汉市江夏区疾病预防控制中心	湖北省武汉市江夏区	武汉市江夏区疾病预防控制中心			2014-05-07 08	继发	病原学阳性		田晓春	2014-05-07	新患者	初治	2014-07-07	2014-05-07							治疗	湖北省武汉市江夏区	武汉市江夏区纸坊社区卫生服务中心		治愈
		1265	普通病案	湖北省武汉市洪山区	洪山区疾病预防控制中心	湖北省武汉市洪山区	洪山区疾病预防控制中心	420111016-2014-00229	1265	23	男性	汉族	学生	本县区	420111003		转诊	2014-04-12	2014-04-29	17	阴性	2014-05-07	湖北省武汉市洪山区	洪山区疾病预防控制中心	湖北省武汉市洪山区	洪山区疾病预防控制中心			2014-05-07 10	继发	病原学阴性		朱国强	2014-05-07	新患者	初治		2014-05-07							治疗	湖北省武汉市洪山区	洪山区狮子山街华中农业大学医院		完成疗程
		1266	普通病案	湖北省武汉市洪山区	洪山区疾病预防控制中心	湖北省武汉市洪山区	洪山区疾病预防控制中心	420111016-2014-00232	1266	25	女性	汉族	学生	本县区	420111002		转诊	2014-04-29	2014-05-03	4	阴性	2014-05-07	湖北省武汉市洪山区	洪山区疾病预防控制中心	湖北省武汉市洪山区	洪山区疾病预防控制中心			2014-05-07 10	继发	病原学阴性		朱国强	2014-05-07	新患者	初治		2014-05-07							治疗	湖北省武汉市洪山区	洪山区关山街华中科技大学医院		完成疗程
		1267	普通病案	湖北省武汉市洪山区	洪山区疾病预防控制中心	湖北省武汉市洪山区	洪山区疾病预防控制中心	420111016-2014-00230	1267	21	男性	汉族	学生	本县区	420111004		转诊	2014-04-28	2014-05-04	6	阴性	2014-05-07	湖北省武汉市洪山区	洪山区疾病预防控制中心	湖北省武汉市洪山区	洪山区疾病预防控制中心			2014-05-07 09	继发	病原学阴性		朱国强	2014-05-07	新患者	初治		2014-05-07							治疗	湖北省武汉市洪山区	武汉市洪山区张家湾街社区卫生中心		完成疗程
		1268	普通病案	湖北省武汉市黄陂区	武汉市黄陂区疾病预防控制中心	湖北省武汉市黄陂区	武汉市黄陂区疾病预防控制中心	420116003-2014-00336	1268	15	女性	汉族	学生	本县区	420116014		转诊	2014-04-24	2014-05-08	14			湖北省武汉市黄陂区	武汉市黄陂区疾病预防控制中心	湖北省武汉市黄陂区	武汉市黄陂区疾病预防控制中心			2014-05-08 10	继发	病原学阴性		胡兴无	2014-05-08	新患者	初治		2014-05-08							治疗	湖北省武汉市黄陂区	武汉市黄陂区三里桥街道卫生院		完成疗程
		1269	普通病案	湖北省武汉市洪山区	洪山区疾病预防控制中心	湖北省武汉市洪山区	洪山区疾病预防控制中心	420111016-2014-00238	1269	19	女性	汉族	学生	本县区	420111011		转诊	2014-03-30	2014-04-16	17	阴性	2014-05-09	湖北省武汉市洪山区	洪山区疾病预防控制中心	湖北省武汉市洪山区	洪山区疾病预防控制中心			2014-05-09 10	继发	病原学阳性		朱国强	2014-05-09	新患者	初治		2014-05-09							治疗	湖北省武汉市洪山区	武汉市洪山区张家湾街社区卫生中心		治愈
		1270	普通病案	湖北省武汉市汉阳区	武汉市汉阳区结核病防治所	湖北省武汉市汉阳区	武汉市汉阳区结核病防治所	420105012-2014-00130	1270	18	男性	汉族	学生	本县区	420105009		转诊	2014-04-01	2014-04-10	9	阴性	2014-04-23	湖北省武汉市汉阳区	武汉市汉阳区结核病防治所	湖北省武汉市汉阳区	武汉市汉阳区结核病防治所			2014-05-14 12	继发	病原学阴性		马莉	2014-05-14	新患者	初治	2014-06-20	2014-05-14							治疗	湖北省武汉市汉阳区	武汉市汉阳区二桥街社区卫生服务中心		完成疗程
		1271	普通病案	湖北省武汉市江汉区	武汉市江汉区疾病预防控制中心	湖北省武汉市江汉区	武汉市江汉区疾病预防控制中心	420103013-2014-00144	1271	17	男性	汉族	学生	本县区	420103004		转诊	2014-04-25	2014-04-28	3	阴性	2014-05-07	湖北省武汉市江汉区	武汉市江汉区疾病预防控制中心	湖北省武汉市江汉区	武汉市江汉区疾病预防控制中心			2014-05-14 08	继发	病原学阴性		罗艺肖红	2014-05-14	新患者	初治		2014-05-14							治疗	湖北省武汉市江汉区	江汉区民权街社区卫生服务中心		完成疗程
		1272	普通病案	湖北省武汉市江夏区	武汉市江夏区疾病预防控制中心	湖北省武汉市江夏区	武汉市江夏区疾病预防控制中心	420115008-2014-00191	1272	24	男性	汉族	学生	本县区	420115001		转诊	2014-04-12	2014-04-24	12			湖北省武汉市江夏区	武汉市江夏区疾病预防控制中心	湖北省武汉市江夏区	武汉市江夏区疾病预防控制中心			2014-05-15 11	继发	病原学阴性	无	田晓春	2014-05-15	新患者	初治	2014-07-15	2014-05-15							治疗	湖北省武汉市江夏区	武汉市江夏区纸坊社区卫生服务中心		完成疗程
		1273	普通病案	湖北省武汉市东湖高新技术开发区	武汉东湖新技术开发区佛祖岭社区卫生服务中心	湖北省武汉市东湖高新技术开发区	武汉东湖新技术开发区佛祖岭社区卫生服务中心	420192011-2014-01055	1273	18	男性	汉族	学生	本市其它县区	420192002		追踪	2014-05-01	2014-05-16	15			湖北省武汉市东湖高新技术开发区	武汉东湖新技术开发区佛祖岭社区卫生服务中心	湖北省武汉市东湖高新技术开发区	武汉东湖新技术开发区佛祖岭社区卫生服务中心			2014-05-16 09	继发	病原学阳性		邱宏	2014-05-16	新患者	初治		2014-05-16							治疗	湖北省武汉市东湖高新技术开发区	武汉东湖新技术开发区佛祖岭社区卫生服务中心		治愈
		1274	普通病案	湖北省武汉市东湖高新技术开发区	武汉东湖新技术开发区佛祖岭社区卫生服务中心	湖北省武汉市东湖高新技术开发区	武汉东湖新技术开发区佛祖岭社区卫生服务中心	420192011-2014-01056	1274	22	男性	汉族	学生	本市其它县区	420192002		追踪	2014-04-28	2014-04-29	1	阴性	2014-04-25	湖北省武汉市东湖高新技术开发区	武汉东湖新技术开发区佛祖岭社区卫生服务中心	湖北省武汉市东湖高新技术开发区	武汉东湖新技术开发区佛祖岭社区卫生服务中心			2014-05-19 10	继发	病原学阴性		邱宏	2014-05-19	新患者	初治		2014-05-19							治疗	湖北省武汉市东湖高新技术开发区	武汉东湖新技术开发区佛祖岭社区卫生服务中心		完成疗程
		1275	普通病案	湖北省武汉市洪山区	洪山区疾病预防控制中心	湖北省武汉市洪山区	洪山区疾病预防控制中心	420111016-2014-00249	1275	22	男性	汉族	学生	本县区	420111002		转诊	2014-05-06	2014-05-15	9	阴性	2014-05-19	湖北省武汉市洪山区	洪山区疾病预防控制中心	湖北省武汉市洪山区	洪山区疾病预防控制中心			2014-05-19 09	继发	病原学阴性		朱国强	2014-05-19	新患者	初治		2014-05-19							治疗	湖北省武汉市洪山区	中国地质大学医院		完成疗程
		1276	普通病案	湖北省武汉市洪山区	洪山区疾病预防控制中心	湖北省武汉市洪山区	洪山区疾病预防控制中心	420111016-2014-00246	1276	21	女性	汉族	学生	本县区	420111011		转诊	2014-05-05	2014-05-13	8	阴性	2014-05-19	湖北省武汉市洪山区	洪山区疾病预防控制中心	湖北省武汉市洪山区	洪山区疾病预防控制中心			2014-05-19 08	继发	病原学阴性		朱国强	2014-05-19	新患者	初治		2014-05-19							治疗	湖北省武汉市洪山区	武汉市洪山区张家湾街社区卫生中心		完成疗程
		1277	普通病案	湖北省武汉市洪山区	洪山区疾病预防控制中心	湖北省武汉市洪山区	洪山区疾病预防控制中心	420111016-2014-00253	1277	21	男性	汉族	学生	本县区	420111002		转诊	2013-09-01	2014-05-12	253	阴性	2014-05-19	湖北省武汉市洪山区	洪山区疾病预防控制中心	湖北省武汉市洪山区	洪山区疾病预防控制中心			2014-05-19 09	继发	病原学阴性		朱国强	2014-05-19	新患者	初治		2014-05-19							治疗	湖北省武汉市洪山区	中国地质大学医院		完成疗程
		1278	普通病案	湖北省武汉市洪山区	洪山区疾病预防控制中心	湖北省武汉市洪山区	洪山区疾病预防控制中心	420111016-2014-00250	1278	18	女性	汉族	学生	本县区	420111001		转诊	2014-05-14	2014-05-15	1	阴性	2014-05-19	湖北省武汉市洪山区	洪山区疾病预防控制中心	湖北省武汉市洪山区	洪山区疾病预防控制中心			2014-05-19 09	继发	病原学阴性		朱国强	2014-05-19	新患者	初治		2014-05-19							治疗	湖北省武汉市洪山区	洪山区珞南街华中师范大学医院		完成疗程
		1279	普通病案	湖北省武汉市青山区	青山区结核病防治所	湖北省武汉市青山区	青山区结核病防治所	420107018-2014-00098	1279	22	女性	汉族	学生	本市其它县区	420107001		转诊	2014-04-01	2014-04-08	7	阴性	2014-05-16	湖北省武汉市青山区	青山区结核病防治所	湖北省武汉市青山区	青山区结核病防治所			2014-05-20 00	继发	病原学阴性		郑和平	2014-05-20	新患者	初治		2014-05-20							治疗				完成疗程
		1280	普通病案	湖北省武汉市江夏区	武汉市江夏区疾病预防控制中心	湖北省武汉市江夏区	武汉市江夏区疾病预防控制中心	420115008-2014-00200	1280	16	女性	汉族	学生	本县区	420115003		转诊	2014-04-25	2014-05-08	13	阴性	2014-05-12	湖北省武汉市江夏区	武汉市江夏区疾病预防控制中心	湖北省武汉市江夏区	武汉市江夏区疾病预防控制中心			2014-05-20 08	继发	病原学阴性		田晓春	2014-05-20	新患者	初治	2014-07-20	2014-05-20							治疗	湖北省武汉市江夏区	武汉市江夏区乌龙泉街卫生院		完成疗程
		1281	普通病案	湖北省武汉市硚口区	武汉市结核病防治所	湖北省武汉市硚口区	武汉市结核病防治所	420104019-2014-00202	1281	20	女性	汉族	学生	本县区	420104005		转诊	2014-05-10	2014-05-19	9	阴性	2014-05-20	湖北省武汉市硚口区	武汉市结核病防治所	湖北省武汉市硚口区	武汉市结核病防治所			2014-05-20 09	继发	病原学阳性		张伟	2014-05-20	新患者	初治		2014-05-20							治疗	湖北省武汉市硚口区	武汉市结核病防治所		治愈
		1282	普通病案	湖北省武汉市东西湖区	东西湖区结核病防治所	湖北省武汉市东西湖区	东西湖区结核病防治所	420112019-2014-00084	1282	17	女性	汉族	学生	本县区	420112001		追踪	2014-04-05	2014-04-09	4	阴性	2014-05-20	湖北省武汉市东西湖区	东西湖区结核病防治所	湖北省武汉市东西湖区	东西湖区结核病防治所			2014-05-20 09	继发	病原学阴性		胡才生	2014-05-20	新患者	初治		2014-05-20							治疗	湖北省武汉市东西湖区	东西湖区吴家山街社区卫生服务中心		完成疗程
		1283	普通病案	湖北省武汉市硚口区	武汉市结核病防治所	湖北省武汉市硚口区	武汉市结核病防治所	420104019-2014-00203	1283	21	男性	汉族	学生	本县区	420104005		转诊	2014-05-01	2014-05-20	19	阴性	2014-05-21	湖北省武汉市硚口区	武汉市结核病防治所	湖北省武汉市硚口区	武汉市结核病防治所			2014-05-21 10	继发	病原学阴性		刘小玉	2014-05-21	新患者	初治		2014-05-21							治疗	湖北省武汉市硚口区	武汉市结核病防治所		完成疗程
		1284	普通病案	湖北省武汉市洪山区	洪山区疾病预防控制中心	湖北省武汉市洪山区	洪山区疾病预防控制中心	420111016-2014-00254	1284	22	女性	汉族	学生	本县区	420111002		转诊	2014-05-12	2014-05-19	7	阴性	2014-05-21	湖北省武汉市洪山区	洪山区疾病预防控制中心	湖北省武汉市洪山区	洪山区疾病预防控制中心			2014-05-21 09	继发	病原学阴性		朱国强	2014-05-21	新患者	初治		2014-05-21							治疗	湖北省武汉市洪山区	中国地质大学医院		完成疗程
		1285	普通病案	湖北省武汉市江岸区	江岸区疾病预防控制中心	湖北省武汉市江岸区	江岸区疾病预防控制中心	420102000-2014-00205	1285	17	男性	汉族	学生	本市其它县区	420102017		转诊	2014-05-12	2014-05-14	2	阴性	2014-05-14	湖北省武汉市江岸区	江岸区疾病预防控制中心	湖北省武汉市江岸区	江岸区疾病预防控制中心			2014-05-22 09	继发	病原学阴性		连展	2014-05-22	新患者	初治		2014-05-22							治疗	湖北省武汉市江岸区	江岸区塔子湖街社区卫生服务中心		完成疗程
		1286	普通病案	湖北省武汉市江夏区	武汉市江夏区疾病预防控制中心	湖北省武汉市江夏区	武汉市江夏区疾病预防控制中心	420115008-2014-00213	1286	19	男性	汉族	学生	本县区	420115011		转诊	2014-04-13	2014-04-16	3	阴性	2014-04-22	湖北省武汉市江夏区	武汉市江夏区疾病预防控制中心	湖北省武汉市江夏区	武汉市江夏区疾病预防控制中心			2014-05-22 15	继发	病原学阴性		田晓春	2014-05-22	新患者	初治	2014-07-22	2014-05-22							治疗	湖北省武汉市江夏区	武汉市江夏区安山镇卫生院		完成疗程
		1287	普通病案	湖北省武汉市洪山区	洪山区疾病预防控制中心	湖北省武汉市洪山区	洪山区疾病预防控制中心	420111016-2014-00257	1287	19	男性	汉族	学生	本县区	420111006		转诊	2014-04-18	2014-05-23	35	阴性	2014-05-23	湖北省武汉市洪山区	洪山区疾病预防控制中心	湖北省武汉市洪山区	洪山区疾病预防控制中心			2014-05-23 11	继发	病原学阴性		朱国强	2014-05-23	新患者	初治		2014-05-23							治疗	湖北省武汉市洪山区	洪山区疾病预防控制中心		完成疗程
		1288	普通病案	湖北省武汉市硚口区	武汉市结核病防治所	湖北省武汉市硚口区	武汉市结核病防治所	420104019-2014-00208	1288	19	男性	汉族	学生	本县区	420104009		转诊	2014-02-10	2014-05-25	104	阴性	2014-05-26	湖北省武汉市硚口区	武汉市结核病防治所	湖北省武汉市硚口区	武汉市结核病防治所			2014-05-26 14	继发	病原学阳性		刘妍丽	2014-05-26	新患者	初治		2014-05-26							治疗	湖北省武汉市硚口区	武汉市结核病防治所		治愈
		1289	普通病案	湖北省武汉市东西湖区	东西湖区结核病防治所	湖北省武汉市东西湖区	东西湖区结核病防治所	420112019-2014-00088	1289	17	男性	汉族	学生	本县区	420112001		转诊	2014-05-14	2014-05-15	1	阴性	2014-05-23	湖北省武汉市东西湖区	东西湖区结核病防治所	湖北省武汉市东西湖区	东西湖区结核病防治所			2014-05-26 14	继发	病原学阴性		孟刚	2014-05-26	新患者	初治		2014-05-26							治疗	湖北省武汉市东西湖区	东西湖区长青街卫生院		完成疗程
		1290	普通病案	湖北省武汉市硚口区	武汉市结核病防治所	湖北省武汉市硚口区	武汉市结核病防治所	420104019-2014-00209	1290	20	女性	汉族	学生	本县区	420104006		转诊	2014-05-15	2014-05-25	10	阴性	2014-05-26	湖北省武汉市硚口区	武汉市结核病防治所	湖北省武汉市硚口区	武汉市结核病防治所			2014-05-26 14	继发	病原学阳性		张伟	2014-05-26	新患者	初治		2014-05-26							治疗	湖北省武汉市硚口区	武汉市结核病防治所		治愈
		1291	普通病案	湖北省武汉市洪山区	洪山区疾病预防控制中心	湖北省武汉市洪山区	洪山区疾病预防控制中心	420111016-2014-00265	1291	24	男性	汉族	学生	本县区	420111002		转诊	2014-05-14	2014-05-21	7	阴性	2014-05-26	湖北省武汉市洪山区	洪山区疾病预防控制中心	湖北省武汉市洪山区	洪山区疾病预防控制中心			2014-05-26 15	继发	病原学阴性		朱国强	2014-05-26	新患者	初治		2014-05-26							治疗	湖北省武汉市洪山区	洪山区疾病预防控制中心		完成疗程
		1292	普通病案	湖北省武汉市洪山区	洪山区疾病预防控制中心	湖北省武汉市洪山区	洪山区疾病预防控制中心	420111016-2014-00263	1292	19	男性	汉族	学生	本县区	420111002		转诊	2014-05-17	2014-05-20	3	阴性	2014-05-26	湖北省武汉市洪山区	洪山区疾病预防控制中心	湖北省武汉市洪山区	洪山区疾病预防控制中心			2014-05-26 15	继发	病原学阴性		朱国强	2014-05-26	新患者	初治		2014-05-26							治疗	湖北省武汉市洪山区	中国地质大学医院		完成疗程
		1293	普通病案	湖北省武汉市洪山区	洪山区疾病预防控制中心	湖北省武汉市洪山区	洪山区疾病预防控制中心	420111016-2014-00261	1293	21	女性	汉族	学生	本县区	420111007		转诊	2014-05-19	2014-05-21	2	阴性	2014-05-26	湖北省武汉市洪山区	洪山区疾病预防控制中心	湖北省武汉市洪山区	洪山区疾病预防控制中心			2014-05-26 09	继发	病原学阴性		朱国强	2014-05-26	新患者	初治		2014-05-26							治疗	湖北省武汉市洪山区	洪山区洪山街社区卫生服务中心		完成疗程
		1294	普通病案	湖北省武汉市洪山区	洪山区疾病预防控制中心	湖北省武汉市洪山区	洪山区疾病预防控制中心	420111016-2014-00269	1294	14	男性	汉族	学生	本县区	420190001		转诊	2014-05-03	2014-05-22	19	阴性	2014-05-26	湖北省武汉市洪山区	洪山区疾病预防控制中心	湖北省武汉市洪山区	洪山区疾病预防控制中心			2014-05-26 15	继发	病原学阴性		朱国强	2014-05-26	新患者	初治		2014-05-26							治疗	湖北省武汉市洪山区	洪山区和平街社区卫生服务中心		完成疗程
		1295	普通病案	湖北省武汉市武昌区	武昌区疾病预防控制中心	湖北省武汉市武昌区	武昌区疾病预防控制中心	420106010-2014-00302	1295	17	女性	汉族	学生	本县区	420106013		直接就诊	2014-05-19	2014-05-27	8	阴性	2014-05-27	湖北省武汉市武昌区	武昌区疾病预防控制中心	湖北省武汉市武昌区	武昌区疾病预防控制中心			2014-05-27 15	继发	病原学阴性		刘文	2014-05-27	新患者	初治		2014-05-27							治疗				完成疗程
		1296	普通病案	湖北省武汉市武昌区	武昌区疾病预防控制中心	湖北省武汉市武昌区	武昌区疾病预防控制中心	420106010-2014-00305	1296	16	女性	汉族	学生	本县区	420106011		直接就诊	2014-05-20	2014-05-27	7	阴性	2014-05-27	湖北省武汉市武昌区	武昌区疾病预防控制中心	湖北省武汉市武昌区	武昌区疾病预防控制中心			2014-05-27 15	继发	病原学阴性		刘文	2014-05-27	新患者	初治		2014-05-27							治疗				完成疗程
		1297	普通病案	湖北省武汉市江汉区	武汉市江汉区疾病预防控制中心	湖北省武汉市江汉区	武汉市江汉区疾病预防控制中心	420103013-2014-00159	1297	17	男性	汉族	学生	本市其它县区	420103012		追踪	2014-05-19	2014-05-22	3	阴性	2014-05-22	湖北省武汉市江汉区	武汉市江汉区疾病预防控制中心	湖北省武汉市江汉区	武汉市江汉区疾病预防控制中心			2014-05-28 08	继发	病原学阴性		张宗琪	2014-05-28	新患者	初治		2014-05-28							治疗	湖北省武汉市江汉区	江汉区汉兴街社区卫生服务中心		完成疗程
		1298	普通病案	湖北省武汉市江夏区	武汉市江夏区疾病预防控制中心	湖北省武汉市江夏区	武汉市江夏区疾病预防控制中心	420115008-2014-00218	1298	21	女性	汉族	学生	本县区	420115001		转诊	2014-05-22	2014-05-27	5	阴性	2014-05-24	湖北省武汉市江夏区	武汉市江夏区疾病预防控制中心	湖北省武汉市江夏区	武汉市江夏区疾病预防控制中心			2014-05-28 08	继发	病原学阴性		田晓春	2014-05-28	新患者	初治	2014-07-28	2014-05-28							治疗	湖北省武汉市江夏区	武汉市江夏区纸坊社区卫生服务中心		完成疗程
		1299	普通病案	湖北省武汉市江岸区	江岸区疾病预防控制中心	湖北省武汉市江岸区	江岸区疾病预防控制中心	420102000-2014-00220	1299	19	男性	汉族	学生	本市其它县区	420102015		转诊	2014-05-24	2014-05-26	2	阴性	2014-05-24	湖北省武汉市江岸区	江岸区疾病预防控制中心	湖北省武汉市江岸区	江岸区疾病预防控制中心			2014-05-29 10	继发	病原学阴性		李晟	2014-05-29	新患者	初治		2014-05-29							治疗	湖北省武汉市江岸区	江岸区花桥街第一社区卫生服务中心		完成疗程
		1300	普通病案	湖北省武汉市蔡甸区	武汉市蔡甸区疾病预防控制中心	湖北省武汉市蔡甸区	武汉市蔡甸区疾病预防控制中心	420114003-2014-00183	1300	12	女性	汉族	学生	本市其它县区	420114002		追踪	2014-05-21	2014-05-29	8	阴性	2014-05-29	湖北省武汉市蔡甸区	武汉市蔡甸区疾病预防控制中心	湖北省武汉市蔡甸区	武汉市蔡甸区疾病预防控制中心			2014-05-29 15	继发	病原学阳性		刘晓燕	2014-05-29	新患者	初治		2014-05-29							治疗	湖北省武汉市蔡甸区	武汉市蔡甸区奓山街卫生院		治愈
		1301	普通病案	湖北省武汉市蔡甸区	武汉市蔡甸区疾病预防控制中心	湖北省武汉市蔡甸区	武汉市蔡甸区疾病预防控制中心	420114003-2014-00165	1301	17	男性	汉族	学生	本市其它县区	420114005		追踪	2014-05-16	2014-05-29	13	阴性	2014-05-29	湖北省武汉市蔡甸区	武汉市蔡甸区疾病预防控制中心	湖北省武汉市蔡甸区	武汉市蔡甸区疾病预防控制中心			2014-05-29 11	继发	病原学阳性		刘晓燕	2014-05-29	新患者	初治		2014-05-29							治疗	湖北省武汉市蔡甸区	武汉市蔡甸区大集街卫生院		治愈
		1302	普通病案	湖北省武汉市东西湖区	东西湖区结核病防治所	湖北省武汉市东西湖区	东西湖区结核病防治所	420112019-2014-00099	1302	16	男性	汉族	学生	本县区	420112006		转诊	2014-05-18	2014-05-21	3	阴性	2014-05-22	湖北省武汉市东西湖区	东西湖区结核病防治所	湖北省武汉市东西湖区	东西湖区结核病防治所			2014-05-30 15	继发	病原学阴性		胡才生	2014-05-30	新患者	初治		2014-05-30							治疗	湖北省武汉市东西湖区	东西湖区走马岭街中心卫生院		完成疗程
		1303	普通病案	湖北省武汉市江岸区	江岸区疾病预防控制中心	湖北省武汉市江岸区	江岸区疾病预防控制中心	420102000-2014-00224	1303	26	男性	汉族	学生	本市其它县区	420102400		转诊	2014-04-27	2014-05-14	17	未提供		湖北省武汉市江岸区	江岸区疾病预防控制中心	湖北省武汉市江岸区	江岸区疾病预防控制中心			2014-06-03 09	继发	病原学阴性		丁菡	2014-06-03	新患者	初治		2014-06-03							治疗	湖北省武汉市江岸区	江岸区百步亭花园社区卫生服务中心		完成疗程
		1304	普通病案	湖北省武汉市汉南区	武汉市汉南区疾病预防控制中心	湖北省武汉市汉南区	武汉市汉南区疾病预防控制中心	420113006-2014-02015	1304	20	女性	汉族	学生	本县区	420113096		转诊	2014-04-20	2014-05-05	15	阴性	2014-05-02	湖北省武汉市汉南区	武汉市汉南区疾病预防控制中心	湖北省武汉市汉南区	武汉市汉南区疾病预防控制中心			2014-06-03 09	继发	病原学阴性		聂绪军	2014-06-03	新患者	初治	2014-07-07	2014-06-03							治疗	湖北省武汉市汉南区	武汉市汉南区疾病预防控制中心		完成疗程
		1305	普通病案	湖北省武汉市洪山区	洪山区疾病预防控制中心	湖北省武汉市洪山区	洪山区疾病预防控制中心	420111016-2014-00277	1305	22	男性	汉族	学生	本县区	420111002		转诊	2014-05-18	2014-05-29	11	阴性	2014-06-04	湖北省武汉市洪山区	洪山区疾病预防控制中心	湖北省武汉市洪山区	洪山区疾病预防控制中心			2014-06-04 09	继发	病原学阴性		朱国强	2014-06-04	新患者	初治		2014-06-04							治疗	湖北省武汉市洪山区	洪山区疾病预防控制中心		完成疗程
		1306	普通病案	湖北省武汉市洪山区	洪山区疾病预防控制中心	湖北省武汉市洪山区	洪山区疾病预防控制中心	420111016-2014-00284	1306	24	女性	汉族	学生	本县区	420111011		转诊	2014-05-01	2014-06-03	33	阴性	2014-06-09	湖北省武汉市洪山区	洪山区疾病预防控制中心	湖北省武汉市洪山区	洪山区疾病预防控制中心			2014-06-09 09	继发	病原学阳性		朱国强	2014-06-09	新患者	初治		2014-06-09							治疗	湖北省武汉市洪山区	武汉市洪山区张家湾街社区卫生中心		治愈
		1307	普通病案	湖北省武汉市江岸区	江岸区疾病预防控制中心	湖北省武汉市江岸区	江岸区疾病预防控制中心	420102000-2014-00233	1307	17	男性	汉族	学生	本市其它县区	420102010		转诊	2014-03-26	2014-03-28	2	阴性	2014-06-10	湖北省武汉市江岸区	江岸区疾病预防控制中心	湖北省武汉市江岸区	江岸区疾病预防控制中心			2014-06-10 09	继发	病原学阴性		杜娟	2014-06-10	新患者	初治		2014-06-10							治疗	湖北省武汉市江岸区	江岸区二七街社区卫生服务中心		完成疗程
		1308	普通病案	湖北省武汉市黄陂区	武汉市黄陂区疾病预防控制中心	湖北省武汉市黄陂区	武汉市黄陂区疾病预防控制中心	420116003-2014-00376	1308	19	女性	汉族	学生	本县区	420116001		转诊	2014-05-28	2014-06-10	13			湖北省武汉市黄陂区	武汉市黄陂区疾病预防控制中心	湖北省武汉市黄陂区	武汉市黄陂区疾病预防控制中心			2014-06-10 10	继发	病原学阴性		汪惠兰	2014-06-10	新患者	初治		2014-06-10							治疗	湖北省武汉市黄陂区	武汉市黄陂区环城社区卫生服务中心		完成疗程
		1309	普通病案	湖北省武汉市黄陂区	武汉市黄陂区疾病预防控制中心	湖北省武汉市黄陂区	武汉市黄陂区疾病预防控制中心	420116003-2014-00380	1309	18	男性	汉族	学生	本县区	420116013		转诊	2014-06-09	2014-06-12	3			湖北省武汉市黄陂区	武汉市黄陂区疾病预防控制中心	湖北省武汉市黄陂区	武汉市黄陂区疾病预防控制中心			2014-06-12 10	继发	病原学阳性		候光华	2014-06-12	新患者	初治		2014-06-12							治疗	湖北省武汉市黄陂区	武汉市黄陂区蔡家榨街道卫生院		转入耐多药治疗
		1310	普通病案	湖北省武汉市青山区	青山区结核病防治所	湖北省武汉市青山区	青山区结核病防治所	420107018-2014-00110	1310	17	女性	汉族	学生	本市其它县区	420107008		追踪	2014-03-04	2014-04-10	37			湖北省武汉市青山区	青山区结核病防治所	湖北省武汉市青山区	青山区结核病防治所			2014-06-13 10	继发	病原学阴性		郑和平	2014-06-13	新患者	初治		2014-06-13							治疗				完成疗程
		1311	普通病案	湖北省武汉市洪山区	洪山区疾病预防控制中心	湖北省武汉市洪山区	洪山区疾病预防控制中心	420111016-2014-00298	1311	21	女性	汉族	学生	本县区	420111002		转诊	2014-06-08	2014-06-12	4	阴性	2014-06-16	湖北省武汉市洪山区	洪山区疾病预防控制中心	湖北省武汉市洪山区	洪山区疾病预防控制中心			2014-06-16 09	继发	病原学阴性		朱国强	2014-06-16	新患者	初治		2014-06-16							治疗	湖北省武汉市洪山区	洪山区狮子山街华中农业大学医院		完成疗程
		1312	普通病案	湖北省武汉市洪山区	洪山区疾病预防控制中心	湖北省武汉市洪山区	洪山区疾病预防控制中心	420111016-2014-00299	1312	21	男性	汉族	学生	本县区	420111002		转诊	2014-06-08	2014-06-12	4	阴性	2014-06-16	湖北省武汉市洪山区	洪山区疾病预防控制中心	湖北省武汉市洪山区	洪山区疾病预防控制中心			2014-06-16 09	继发	病原学阴性		朱国强	2014-06-16	新患者	初治		2014-06-16							治疗	湖北省武汉市洪山区	洪山区疾病预防控制中心		完成疗程
		1313	普通病案	湖北省武汉市洪山区	洪山区疾病预防控制中心	湖北省武汉市洪山区	洪山区疾病预防控制中心	420111016-2014-00300	1313	23	女性	汉族	学生	本县区	420111002		转诊	2014-06-03	2014-06-12	9	阴性	2014-06-16	湖北省武汉市洪山区	洪山区疾病预防控制中心	湖北省武汉市洪山区	洪山区疾病预防控制中心			2014-06-16 08	继发	病原学阳性		朱国强	2014-06-16	新患者	初治		2014-06-16							治疗	湖北省武汉市洪山区	洪山区疾病预防控制中心		治愈
		1314	普通病案	湖北省武汉市东湖高新技术开发区	武汉东湖新技术开发区佛祖岭社区卫生服务中心	湖北省武汉市东湖高新技术开发区	武汉东湖新技术开发区佛祖岭社区卫生服务中心	420192011-2014-01073	1314	19	男性	汉族	学生	本市其它县区	420192002		追踪	2014-05-21	2014-06-17	27			湖北省武汉市东湖高新技术开发区	武汉东湖新技术开发区佛祖岭社区卫生服务中心	湖北省武汉市东湖高新技术开发区	武汉东湖新技术开发区佛祖岭社区卫生服务中心			2014-06-17 16	继发	病原学阳性		邱宏	2014-06-17	新患者	初治		2014-06-17							治疗	湖北省武汉市东湖高新技术开发区	武汉东湖新技术开发区佛祖岭社区卫生服务中心		治愈
		1315	普通病案	湖北省武汉市武昌区	武昌区疾病预防控制中心	湖北省武汉市武昌区	武昌区疾病预防控制中心	420106010-2014-00348	1315	19	女性	汉族	学生	本市其它县区	420106007		追踪	2014-02-10	2014-02-11	1	阴性	2014-06-17	湖北省武汉市武昌区	武昌区疾病预防控制中心	湖北省武汉市武昌区	武昌区疾病预防控制中心			2014-06-17 04	继发	病原学阴性		刘文	2014-06-17	新患者	初治		2014-06-17							治疗				完成疗程
		1316	普通病案	湖北省武汉市东湖高新技术开发区	武汉东湖新技术开发区佛祖岭社区卫生服务中心	湖北省武汉市东湖高新技术开发区	武汉东湖新技术开发区佛祖岭社区卫生服务中心	420192011-2014-01076	1316	21	女性	汉族	学生	本市其它县区	420192002		追踪	2014-05-14	2014-06-19	36			湖北省武汉市东湖高新技术开发区	武汉东湖新技术开发区佛祖岭社区卫生服务中心	湖北省武汉市东湖高新技术开发区	武汉东湖新技术开发区佛祖岭社区卫生服务中心			2014-06-19 10	继发	病原学阴性		邱宏	2014-06-19	新患者	初治		2014-06-19							治疗	湖北省武汉市东湖高新技术开发区	武汉东湖新技术开发区佛祖岭社区卫生服务中心		完成疗程
		1317	普通病案	湖北省武汉市硚口区	武汉市结核病防治所	湖北省武汉市硚口区	武汉市结核病防治所	420104019-2014-00238	1317	22	女性	汉族	学生	本县区	420104005		转诊	2014-05-30	2014-06-11	12	阴性	2014-06-20	湖北省武汉市硚口区	武汉市结核病防治所	湖北省武汉市硚口区	武汉市结核病防治所			2014-06-20 10	继发	病原学阴性		李晟	2014-06-20	新患者	初治		2014-06-20							治疗	湖北省武汉市硚口区	武汉市结核病防治所		完成疗程
		1318	普通病案	湖北省武汉市洪山区	洪山区疾病预防控制中心	湖北省武汉市洪山区	洪山区疾病预防控制中心	420111016-2014-00303	1318	22	男性	汉族	学生	本县区	420111002		转诊	2014-06-01	2014-06-17	16	阴性	2014-06-23	湖北省武汉市洪山区	洪山区疾病预防控制中心	湖北省武汉市洪山区	洪山区疾病预防控制中心			2014-06-23 09	继发	病原学阴性		朱国强	2014-06-23	新患者	初治		2014-06-23							治疗	湖北省武汉市洪山区	湖北工业大学医院		完成疗程
		1319	普通病案	湖北省武汉市洪山区	洪山区疾病预防控制中心	湖北省武汉市洪山区	洪山区疾病预防控制中心	420111016-2014-00305	1319	20	男性	汉族	学生	本县区	420111003		转诊	2014-05-01	2014-06-18	48	阴性	2014-06-23	湖北省武汉市洪山区	洪山区疾病预防控制中心	湖北省武汉市洪山区	洪山区疾病预防控制中心			2014-06-23 09	继发	病原学阴性		朱国强	2014-06-23	新患者	初治		2014-06-23							治疗	湖北省武汉市洪山区	湖北工业大学医院		完成疗程
		1320	普通病案	湖北省武汉市洪山区	洪山区疾病预防控制中心	湖北省武汉市洪山区	洪山区疾病预防控制中心	420111016-2014-00304	1320	24	男性	汉族	学生	本县区	420111001		转诊	2014-06-08	2014-06-17	9	阴性	2014-06-23	湖北省武汉市洪山区	洪山区疾病预防控制中心	湖北省武汉市洪山区	洪山区疾病预防控制中心			2014-06-23 09	继发	病原学阴性		朱国强	2014-06-23	新患者	初治		2014-06-23							治疗	湖北省武汉市洪山区	洪山区珞南街理工大社区卫生服务中心		完成疗程
		1321	普通病案	湖北省武汉市洪山区	洪山区疾病预防控制中心	湖北省武汉市洪山区	洪山区疾病预防控制中心	420111016-2014-00302	1321	22	女性	汉族	学生	本县区	420111003		转诊	2014-06-01	2014-06-16	15	阴性	2014-06-17	湖北省武汉市洪山区	洪山区疾病预防控制中心	湖北省武汉市洪山区	洪山区疾病预防控制中心			2014-06-23 09	继发	病原学阴性		朱国强	2014-06-23	新患者	初治		2014-06-23							治疗	湖北省武汉市洪山区	湖北工业大学医院		完成疗程
		1322	普通病案	湖北省武汉市江夏区	武汉市江夏区疾病预防控制中心	湖北省武汉市江夏区	武汉市江夏区疾病预防控制中心	420115008-2014-00262	1322	20	男性	汉族	学生	本县区	420115001		转诊	2014-05-13	2014-05-16	3	未提供		湖北省武汉市江夏区	武汉市江夏区疾病预防控制中心	湖北省武汉市江夏区	武汉市江夏区疾病预防控制中心			2014-06-24 09	继发	病原学阴性		田晓春	2014-06-24	新患者	初治	2014-08-24	2014-06-24							治疗	湖北省武汉市江夏区	武汉市江夏区纸坊社区卫生服务中心		完成疗程
		1323	普通病案	湖北省武汉市硚口区	武汉市结核病防治所	湖北省武汉市硚口区	武汉市结核病防治所	420104019-2014-00259	1323	16	女性	汉族	学生	本县区	420104002		转诊	2014-06-19	2014-06-23	4	阴性	2014-06-24	湖北省武汉市硚口区	武汉市结核病防治所	湖北省武汉市硚口区	武汉市结核病防治所			2014-06-24 08	继发	病原学阴性		王娅	2014-06-24	新患者	初治		2014-06-24							治疗	湖北省武汉市硚口区	武汉市结核病防治所		完成疗程
		1324	普通病案	湖北省武汉市洪山区	洪山区疾病预防控制中心	湖北省武汉市洪山区	洪山区疾病预防控制中心	420111016-2014-00313	1324	22	男性	汉族	学生	本县区	420111001		转诊	2014-05-29	2014-06-08	10	阴性	2014-06-25	湖北省武汉市洪山区	洪山区疾病预防控制中心	湖北省武汉市洪山区	洪山区疾病预防控制中心			2014-06-25 09	继发	病原学阴性		朱国强	2014-06-25	新患者	初治		2014-06-25							治疗	湖北省武汉市洪山区	武汉市洪山区中医医院		完成疗程
		1325	普通病案	湖北省武汉市洪山区	洪山区疾病预防控制中心	湖北省武汉市洪山区	洪山区疾病预防控制中心	420111016-2014-00316	1325	20	男性	汉族	学生	本县区	420111003		转诊	2014-06-20	2014-06-23	3	阴性	2014-06-25	湖北省武汉市洪山区	洪山区疾病预防控制中心	湖北省武汉市洪山区	洪山区疾病预防控制中心			2014-06-25 08	继发	病原学阴性		朱国强	2014-06-25	新患者	初治		2014-06-25							治疗	湖北省武汉市洪山区	洪山区狮子山街华中农业大学医院		完成疗程
		1326	普通病案	湖北省武汉市洪山区	洪山区疾病预防控制中心	湖北省武汉市洪山区	洪山区疾病预防控制中心	420111016-2014-00318	1326	17	男性	汉族	学生	本县区	420190001		转诊	2014-06-17	2014-06-22	5	阴性	2014-06-25	湖北省武汉市洪山区	洪山区疾病预防控制中心	湖北省武汉市洪山区	洪山区疾病预防控制中心			2014-06-25 10	继发	病原学阴性		朱国强	2014-06-25	新患者	初治		2014-06-25							治疗	湖北省武汉市洪山区	洪山区和平街社区卫生服务中心		完成疗程
		1327	普通病案	湖北省武汉市洪山区	洪山区疾病预防控制中心	湖北省武汉市洪山区	洪山区疾病预防控制中心	420111016-2014-00321	1327	24	男性	汉族	学生	本县区	420111001		追踪	2014-06-09	2014-06-13	4	阴性	2014-06-25	湖北省武汉市洪山区	洪山区疾病预防控制中心	湖北省武汉市洪山区	洪山区疾病预防控制中心			2014-06-25 08	继发	病原学阴性		朱国强	2014-06-25	新患者	初治		2014-06-25							治疗	湖北省武汉市洪山区	洪山区关山街华中科技大学医院		完成疗程
		1328	普通病案	湖北省武汉市洪山区	洪山区疾病预防控制中心	湖北省武汉市洪山区	洪山区疾病预防控制中心	420111016-2014-00320	1328	24	男性	汉族	学生	本县区	420111001		转诊	2014-06-19	2014-06-22	3	阴性	2014-06-25	湖北省武汉市洪山区	洪山区疾病预防控制中心	湖北省武汉市洪山区	洪山区疾病预防控制中心			2014-06-25 14	继发	病原学阴性		朱国强	2014-06-25	新患者	初治		2014-06-25							治疗	湖北省武汉市洪山区	洪山区珞南街理工大社区卫生服务中心		完成疗程
		1329	普通病案	湖北省武汉市洪山区	洪山区疾病预防控制中心	湖北省武汉市洪山区	洪山区疾病预防控制中心	420111016-2014-00314	1329	19	女性	汉族	学生	本县区	420111006		转诊	2014-06-12	2014-06-20	8	阴性	2014-06-25	湖北省武汉市洪山区	洪山区疾病预防控制中心	湖北省武汉市洪山区	洪山区疾病预防控制中心			2014-06-25 00	继发	病原学阴性		朱国强	2014-06-25	新患者	初治		2014-06-25							治疗	湖北省武汉市洪山区	洪山区疾病预防控制中心		完成疗程
		1330	普通病案	湖北省武汉市洪山区	洪山区疾病预防控制中心	湖北省武汉市洪山区	洪山区疾病预防控制中心	420111016-2014-00312	1330	18	男性	汉族	学生	本县区	420111002		转诊	2014-05-27	2014-06-03	7	阴性	2014-06-25	湖北省武汉市洪山区	洪山区疾病预防控制中心	湖北省武汉市洪山区	洪山区疾病预防控制中心			2014-06-25 09	继发	病原学阳性		朱国强	2014-06-25	其他	复治		2014-06-25							治疗	湖北省武汉市洪山区	中国地质大学医院		治愈
		1331	普通病案	湖北省武汉市洪山区	洪山区疾病预防控制中心	湖北省武汉市洪山区	洪山区疾病预防控制中心	420111016-2014-00325	1331	21	男性	汉族	学生	本县区	420111002		转诊	2014-06-21	2014-06-26	5	阴性	2014-06-27	湖北省武汉市洪山区	洪山区疾病预防控制中心	湖北省武汉市洪山区	洪山区疾病预防控制中心			2014-06-27 08	继发	病原学阴性		朱国强	2014-06-27	新患者	初治		2014-06-27							治疗	湖北省武汉市洪山区	洪山区关山街华中科技大学医院		完成疗程
		1332	普通病案	湖北省武汉市洪山区	洪山区疾病预防控制中心	湖北省武汉市洪山区	洪山区疾病预防控制中心	420111016-2014-00323	1332	29	女性	汉族	学生	本县区	420111003		转诊	2014-06-17	2014-06-24	7	阴性	2014-06-27	湖北省武汉市洪山区	洪山区疾病预防控制中心	湖北省武汉市洪山区	洪山区疾病预防控制中心			2014-06-27 08	继发	病原学阴性		朱国强	2014-06-27	新患者	初治		2014-06-27							治疗	湖北省武汉市洪山区	洪山区狮子山街华中农业大学医院		完成疗程
		1333	普通病案	湖北省武汉市洪山区	洪山区疾病预防控制中心	湖北省武汉市洪山区	洪山区疾病预防控制中心	420111016-2014-00333	1333	26	女性	汉族	学生	本县区	420111002		转诊	2014-05-20	2014-06-28	39	阴性	2014-06-30	湖北省武汉市洪山区	洪山区疾病预防控制中心	湖北省武汉市洪山区	洪山区疾病预防控制中心			2014-06-30 09	继发	病原学阴性		朱国强	2014-06-30	新患者	初治		2014-06-30							治疗	湖北省武汉市洪山区	中国地质大学医院		完成疗程
		1334	普通病案	湖北省武汉市汉阳区	武汉市汉阳区结核病防治所	湖北省武汉市汉阳区	武汉市汉阳区结核病防治所	420105012-2014-00180	1334	15	男性	汉族	学生	本市其它县区	420105007		追踪	2014-04-16	2014-04-17	1	阴性	2014-06-30	湖北省武汉市汉阳区	武汉市汉阳区结核病防治所	湖北省武汉市汉阳区	武汉市汉阳区结核病防治所			2014-07-02 00	继发	病原学阴性	无	朱建	2014-07-02	新患者	初治	2014-08-29	2014-07-02							治疗	湖北省武汉市汉阳区	汉阳区五里街社区卫生服务中心		完成疗程
		1335	普通病案	湖北省武汉市东湖高新技术开发区	武汉东湖新技术开发区佛祖岭社区卫生服务中心	湖北省武汉市东湖高新技术开发区	武汉东湖新技术开发区佛祖岭社区卫生服务中心	420192011-2014-01087	1335	23	男性	汉族	学生	本市其它县区	420192002		转诊	2014-06-12	2014-07-04	22			湖北省武汉市东湖高新技术开发区	武汉东湖新技术开发区佛祖岭社区卫生服务中心	湖北省武汉市东湖高新技术开发区	武汉东湖新技术开发区佛祖岭社区卫生服务中心			2014-07-04 10	继发	病原学阴性		邱宏	2014-07-04	新患者	初治		2014-07-04							治疗	湖北省武汉市东湖高新技术开发区	武汉东湖新技术开发区佛祖岭社区卫生服务中心		完成疗程
		1336	普通病案	湖北省武汉市青山区	青山区结核病防治所	湖北省武汉市青山区	青山区结核病防治所	420107018-2014-00131	1336	16	女性	汉族	学生	本县区	420107002		转诊	2014-06-13	2014-06-23	10	阴性	2014-07-01	湖北省武汉市青山区	青山区结核病防治所	湖北省武汉市青山区	青山区结核病防治所			2014-07-04 09	继发	病原学阳性	无	郑和平	2014-07-04	新患者	初治		2014-07-04							治疗				治愈
		1337	普通病案	湖北省武汉市洪山区	洪山区疾病预防控制中心	湖北省武汉市洪山区	洪山区疾病预防控制中心	420111016-2014-00338	1337	22	男性	汉族	学生	本县区	420111006		转诊	2014-05-20	2014-06-30	41	阴性	2014-07-04	湖北省武汉市洪山区	洪山区疾病预防控制中心	湖北省武汉市洪山区	洪山区疾病预防控制中心			2014-07-04 10	继发	病原学阳性		朱国强	2014-07-04	新患者	初治		2014-07-04							治疗	湖北省武汉市洪山区	洪山区疾病预防控制中心		治愈
		1338	普通病案	湖北省武汉市洪山区	洪山区疾病预防控制中心	湖北省武汉市洪山区	洪山区疾病预防控制中心	420111016-2014-00340	1338	23	女性	汉族	学生	本县区	420111004		转诊	2014-06-30	2014-07-02	2	阴性	2014-07-07	湖北省武汉市洪山区	洪山区疾病预防控制中心	湖北省武汉市洪山区	洪山区疾病预防控制中心			2014-07-07 10	继发	病原学阳性		朱国强	2014-07-07	新患者	初治		2014-07-07							治疗	湖北省武汉市洪山区	武汉市洪山区张家湾街社区卫生中心		治愈
		1339	普通病案	湖北省武汉市青山区	青山区结核病防治所	湖北省武汉市青山区	青山区结核病防治所	420107018-2014-00135	1339	10	女性	汉族	学生	本县区	420107002		转诊	2014-06-14	2014-06-27	13	阴性	2014-07-02	湖北省武汉市青山区	青山区结核病防治所	湖北省武汉市青山区	青山区结核病防治所			2014-07-08 15	继发	病原学阳性	无	郑和平	2014-07-08	新患者	初治		2014-07-08							治疗				治愈
		1340	普通病案	湖北省武汉市江夏区	武汉市江夏区疾病预防控制中心	湖北省武汉市江夏区	武汉市江夏区疾病预防控制中心	420115008-2014-00283	1340	21	男性	汉族	学生	本县区	420115405		转诊	2014-06-19	2014-07-09	20	阴性	2014-07-05	湖北省武汉市江夏区	武汉市江夏区疾病预防控制中心	湖北省武汉市江夏区	武汉市江夏区疾病预防控制中心			2014-07-09 09	继发	病原学阴性		蒋在慧	2014-07-09	新患者	初治		2014-07-09							治疗	湖北省武汉市江夏区	武汉市江夏区经济开发区大桥新区卫生院		完成疗程
		1341	普通病案	湖北省武汉市洪山区	洪山区疾病预防控制中心	湖北省武汉市洪山区	洪山区疾病预防控制中心	420111016-2014-00347	1341	24	女性	汉族	学生	本县区	420111001		转诊	2014-07-07	2014-07-08	1	阴性	2014-07-09	湖北省武汉市洪山区	洪山区疾病预防控制中心	湖北省武汉市洪山区	洪山区疾病预防控制中心			2014-07-09 08	继发	病原学阴性		朱国强	2014-07-09	新患者	初治		2014-07-09							治疗	湖北省武汉市洪山区	洪山区珞南街华中师范大学医院		完成疗程
		1342	普通病案	湖北省武汉市青山区	青山区结核病防治所	湖北省武汉市青山区	青山区结核病防治所	420107018-2014-00138	1342	17	男性	汉族	学生	本县区	420107003		转诊	2014-06-23	2014-06-30	7	阴性	2014-07-01	湖北省武汉市青山区	青山区结核病防治所	湖北省武汉市青山区	青山区结核病防治所			2014-07-10 10	继发	病原学阴性	无	郑和平	2014-07-10	新患者	初治		2014-07-10							治疗				完成疗程
		1343	普通病案	湖北省武汉市江夏区	武汉市江夏区疾病预防控制中心	湖北省武汉市江夏区	武汉市江夏区疾病预防控制中心	420115008-2014-00286	1343	21	女性	汉族	学生	本县区	420115010		追踪	2014-05-21	2014-05-28	7	阴性	2014-07-11	湖北省武汉市江夏区	武汉市江夏区疾病预防控制中心	湖北省武汉市江夏区	武汉市江夏区疾病预防控制中心			2014-07-11 10	继发	病原学阴性	无	田晓春	2014-07-11	新患者	初治		2014-07-11							治疗	湖北省武汉市江夏区	武汉市江夏区五里界社区卫生服务中心		完成疗程
		1344	普通病案	湖北省武汉市黄陂区	武汉市黄陂区疾病预防控制中心	湖北省武汉市黄陂区	武汉市黄陂区疾病预防控制中心	420116003-2014-00459	1344	19	男性	汉族	学生	本县区	420116096		转诊	2014-07-05	2014-07-14	9			湖北省武汉市黄陂区	武汉市黄陂区疾病预防控制中心	湖北省武汉市黄陂区	武汉市黄陂区疾病预防控制中心			2014-07-14 16	继发	病原学阴性		候光华	2014-07-14	新患者	初治		2014-07-14							治疗	湖北省武汉市黄陂区	武汉市黄陂区人民政府大潭办事处防疫保健所		完成疗程
		1345	普通病案	湖北省武汉市洪山区	洪山区疾病预防控制中心	湖北省武汉市洪山区	洪山区疾病预防控制中心	420111016-2014-00353	1345	17	男性	藏族	学生	本县区	420111008		追踪	2014-05-23	2014-06-17	25	阴性	2014-07-16	湖北省武汉市洪山区	洪山区疾病预防控制中心	湖北省武汉市洪山区	洪山区疾病预防控制中心			2014-07-16 09	继发	病原学阴性		朱国强	2014-07-16	新患者	初治		2014-07-16							治疗	湖北省武汉市洪山区	洪山区和平街社区卫生服务中心		完成疗程
		1346	普通病案	湖北省武汉市武昌区	武昌区疾病预防控制中心	湖北省武汉市武昌区	武昌区疾病预防控制中心	420106010-2014-00414	1346	22	男性	汉族	学生	本县区	420106008		转诊	2014-07-04	2014-07-14	10	阴性	2014-07-18	湖北省武汉市武昌区	武昌区疾病预防控制中心	湖北省武汉市武昌区	武昌区疾病预防控制中心			2014-07-22 10	继发	病原学阳性		刘文	2014-07-18	新患者	初治		2014-07-18							治疗				治愈
		1347	普通病案	湖北省武汉市洪山区	洪山区疾病预防控制中心	湖北省武汉市洪山区	洪山区疾病预防控制中心	420111016-2014-00358	1347	20	男性	汉族	学生	本市其它县区	420111002		转诊	2014-06-10	2014-07-16	36	阴性	2014-07-18	湖北省武汉市洪山区	洪山区疾病预防控制中心	湖北省武汉市洪山区	洪山区疾病预防控制中心			2014-07-18 08	继发	病原学阳性		朱国强	2014-07-18	新患者	初治		2014-07-18							治疗	湖北省武汉市洪山区	中国地质大学医院		转入耐多药治疗
		1348	普通病案	湖北省武汉市洪山区	洪山区疾病预防控制中心	湖北省武汉市洪山区	洪山区疾病预防控制中心	420111016-2014-00357	1348	23	女性	汉族	学生	本市其它县区	420111002		转诊	2014-07-12	2014-07-15	3	阴性	2014-07-18	湖北省武汉市洪山区	洪山区疾病预防控制中心	湖北省武汉市洪山区	洪山区疾病预防控制中心			2014-07-18 08	继发	病原学阴性		朱国强	2014-07-18	新患者	初治		2014-07-18							治疗	湖北省武汉市洪山区	洪山区关山街华中科技大学医院		完成疗程
		1349	普通病案	湖北省武汉市蔡甸区	武汉市蔡甸区疾病预防控制中心	湖北省武汉市蔡甸区	武汉市蔡甸区疾病预防控制中心	420114003-2014-00237	1349	17	男性	汉族	学生	本县区	420114002		追踪	2014-07-11	2014-07-21	10			湖北省武汉市蔡甸区	武汉市蔡甸区疾病预防控制中心	湖北省武汉市蔡甸区	武汉市蔡甸区疾病预防控制中心			2014-07-21 16	继发	病原学阳性		刘晓燕	2014-07-21	新患者	初治		2014-07-21							治疗	湖北省武汉市蔡甸区	武汉市蔡甸区奓山街卫生院		转入耐多药治疗
		1350	普通病案	湖北省武汉市江夏区	武汉市江夏区疾病预防控制中心	湖北省武汉市江夏区	武汉市江夏区疾病预防控制中心	420115008-2014-00294	1350	21	男性	汉族	学生	本县区	420115405		追踪	2014-05-22	2014-07-18	57	阴性	2014-05-20	湖北省武汉市江夏区	武汉市江夏区疾病预防控制中心	湖北省武汉市江夏区	武汉市江夏区疾病预防控制中心			2014-07-21 16	继发	病原学阴性		田晓春	2014-07-21	新患者	初治	2014-09-21	2014-07-21							治疗	湖北省武汉市江夏区	武汉市江夏区经济开发区大桥新区卫生院		完成疗程
		1351	普通病案	湖北省武汉市洪山区	洪山区疾病预防控制中心	湖北省武汉市洪山区	洪山区疾病预防控制中心	420111016-2014-00363	1351	28	女性	汉族	学生	本市其它县区	420111002		转诊	2014-07-01	2014-07-17	16	阴性	2014-07-21	湖北省武汉市洪山区	洪山区疾病预防控制中心	湖北省武汉市洪山区	洪山区疾病预防控制中心			2014-07-21 09	继发	病原学阳性		朱国强	2014-07-21	新患者	初治		2014-07-21							治疗	湖北省武汉市洪山区	洪山区关山街华中科技大学医院		治愈
		1352	普通病案	湖北省武汉市江岸区	江岸区疾病预防控制中心	湖北省武汉市江岸区	江岸区疾病预防控制中心	420102000-2014-00285	1352	18	女性	汉族	学生	本市其它县区	420102012		转诊	2014-06-09	2014-07-19	40			湖北省武汉市江岸区	江岸区疾病预防控制中心	湖北省武汉市江岸区	江岸区疾病预防控制中心			2014-07-22 09	继发	病原学阴性		杜鹃	2014-07-22	新患者	初治		2014-07-22							治疗	湖北省武汉市江岸区	江岸区丹水池街社区卫生服务中心		完成疗程
		1353	普通病案	湖北省武汉市洪山区	洪山区疾病预防控制中心	湖北省武汉市洪山区	洪山区疾病预防控制中心	420111016-2014-00365	1353	23	男性	汉族	学生	本市其它县区	420111011		转诊	2014-04-20	2014-06-05	46	阴性	2014-07-22	湖北省武汉市洪山区	洪山区疾病预防控制中心	湖北省武汉市洪山区	洪山区疾病预防控制中心			2014-07-22 08	继发	病原学阴性		朱国强	2014-07-22	新患者	初治		2014-07-22							治疗	湖北省武汉市洪山区	武汉市洪山区张家湾街社区卫生中心		完成疗程
		1354	普通病案	湖北省武汉市江岸区	江岸区疾病预防控制中心	湖北省武汉市江岸区	江岸区疾病预防控制中心	420102000-2014-00293	1354	15	女性	汉族	学生	本市其它县区	420102400		追踪	2014-07-01	2014-07-23	22			湖北省武汉市江岸区	江岸区疾病预防控制中心	湖北省武汉市江岸区	江岸区疾病预防控制中心			2014-07-23 16	继发	病原学阳性		李佺	2014-07-23	新患者	初治		2014-07-23							治疗	湖北省武汉市江岸区	江岸区百步亭花园社区卫生服务中心		治愈
		1355	普通病案	湖北省武汉市黄陂区	武汉市黄陂区疾病预防控制中心	湖北省武汉市黄陂区	武汉市黄陂区疾病预防控制中心	420116003-2014-00482	1355	17	女性	汉族	学生	本市其它县区	420116001		追踪	2014-05-31	2014-06-03	3			湖北省武汉市黄陂区	武汉市黄陂区疾病预防控制中心	湖北省武汉市黄陂区	武汉市黄陂区疾病预防控制中心			2014-07-23 09	继发	病原学阴性		汪惠兰	2014-07-23	新患者	初治		2014-07-23							治疗	湖北省武汉市黄陂区	武汉市黄陂区环城社区卫生服务中心		完成疗程
		1356	普通病案	湖北省武汉市蔡甸区	武汉市蔡甸区疾病预防控制中心	湖北省武汉市蔡甸区	武汉市蔡甸区疾病预防控制中心	420114003-2014-00254	1356	13	男性	汉族	学生	本市其它县区	420114001		追踪	2014-07-14	2014-07-23	9	阴性	2014-07-23	湖北省武汉市蔡甸区	武汉市蔡甸区疾病预防控制中心	湖北省武汉市蔡甸区	武汉市蔡甸区疾病预防控制中心			2014-07-23 17	继发	病原学阴性		刘晓燕	2014-07-23	新患者	初治		2014-07-23							治疗	湖北省武汉市蔡甸区	武汉市蔡甸区蔡甸街卫生院		完成疗程
		1357	普通病案	湖北省武汉市江夏区	武汉市江夏区疾病预防控制中心	湖北省武汉市江夏区	武汉市江夏区疾病预防控制中心	420115008-2014-00307	1357	20	女性	汉族	学生	本县区	420115005		追踪	2014-05-27	2014-07-24	58			湖北省武汉市江夏区	武汉市江夏区疾病预防控制中心	湖北省武汉市江夏区	武汉市江夏区疾病预防控制中心			2014-07-25 16	继发	病原学阳性	无	田晓春	2014-07-25	新患者	初治	2014-09-25	2014-07-25							治疗	湖北省武汉市江夏区	武汉市江夏区郑店社区卫生服务中心		治愈
		1358	普通病案	湖北省武汉市洪山区	洪山区疾病预防控制中心	湖北省武汉市洪山区	洪山区疾病预防控制中心	420111016-2014-00369	1358	19	男性	汉族	学生	本市其它县区	420111011		转诊	2014-07-10	2014-07-21	11	阴性	2014-07-25	湖北省武汉市洪山区	洪山区疾病预防控制中心	湖北省武汉市洪山区	洪山区疾病预防控制中心			2014-07-25 09	继发	病原学阴性		朱国强	2014-07-25	新患者	初治		2014-07-25							治疗	湖北省武汉市洪山区	武汉市洪山区张家湾街社区卫生中心		完成疗程
		1359	普通病案	湖北省武汉市硚口区	武汉市结核病防治所	湖北省武汉市硚口区	武汉市结核病防治所	420104019-2014-00300	1359	16	男性	汉族	学生	本县区	420104010		转诊	2014-07-01	2014-07-23	22	阴性	2014-07-26	湖北省武汉市硚口区	武汉市结核病防治所	湖北省武汉市硚口区	武汉市结核病防治所			2014-07-26 10	继发	病原学阴性	无	陈国玺	2014-07-26	新患者	初治		2014-07-26							治疗	湖北省武汉市硚口区	武汉市结核病防治所		完成疗程
		1360	普通病案	湖北省武汉市东西湖区	东西湖区结核病防治所	湖北省武汉市东西湖区	东西湖区结核病防治所	420112019-2014-00131	1360	22	女性	汉族	学生	本市其它县区	420112004		追踪	2014-06-06	2014-06-15	9	阴性	2014-06-15	湖北省武汉市东西湖区	东西湖区结核病防治所	湖北省武汉市东西湖区	东西湖区结核病防治所			2014-07-28 09	继发	病原学阳性	无	孟刚	2014-07-28	新患者	初治		2014-07-28							治疗	湖北省武汉市东西湖区	东西湖区将军路街卫生院		治愈
		1361	普通病案	湖北省武汉市东西湖区	东西湖区结核病防治所	湖北省武汉市东西湖区	东西湖区结核病防治所	420112019-2014-00135	1361	19	男性	汉族	学生	本市其它县区	420112400		追踪	2014-05-13	2014-06-06	24	阴性	2014-06-06	湖北省武汉市东西湖区	东西湖区结核病防治所	湖北省武汉市东西湖区	东西湖区结核病防治所			2014-07-29 15	继发	病原学阴性	无	孟刚	2014-07-29	新患者	初治		2014-07-29							治疗	湖北省武汉市东西湖区	常青花园社区卫生服务中心		完成疗程
[truncated: 3,156 more rows]
[truncated: 57 more columns]

## Sheet: Table 1
variable	Number of student patients	Number of days between symptom onset and first visit	Z /H value	P	Number of delayed first visit patients	First visit delay proportion	c2	p
[truncated: 36 more rows]

[truncated: 3 more sheets: Table 2, Figure 1, Figure 2]
