# Supplementary material
Source: Research Square preprint supplement (doi:10.21203/rs.3.rs-8065309/v1)
Supplement: Supplementary file 2 [file ebe153ada3f85eebca665298.xlsx]

## Sheet: Table 1
variable	Number of student patients	Number of days between symptom onset and first visit	Z /H value	P	Number of delayed first visit patients	First visit delay proportion	c2	p
	N (%)	Md（P25, P75）			N	(%)
Year			-1.305	0.192			0.008	0.93
2012-2017	2814 (62.30)	10.00 (5.00, 21.00)			1086	38.5928
2018-2023	1703 (37.70)	11.00 (5.00, 21.00)			665	39.0487
Gender			-0.262	0.794			0.033	0.857
male	2792 (61.81)	11.00 (5.00, 21.00)			1079	38.6461
Female	1725 (38.19)	11.00 (5.00, 22.00)			662	38.3768
Age			5.098	0.165			11.609	0.009
≤5	15 (0.003)	8.00 (4.50, 19.00)			5	33.3333
6～11	93 (0.021)	16.00 (9.00, 35.00)			51	54.8387
12～17	1230 (0.272)	10.00 (4.25, 21.00)			457	37.1545
≥18	3179 (0.704)	11.00 (5.00, 21.00)			1228	38.6285
Nation			-2.133	0.033			7.047	0.008
Han Chinese	4455 (98.63)	11.00 (5.00, 21.00)			1707	38.3165
Non-Han Chinese	62 (1.37)	15.00 (9.00, 23.00)			34	54.8387
Medical region			-0.155	0.877			71.048	＜0.001
Near urban area	3330 (73.72)	11.00 (5.00, 21.00)			1162	34.8949
Far urban area	1187 (26.28)	11.00 (5.00, 22.00)			579	48.7784
Patient registration classification			2.591	0.274			3.819	0.148
New patient	4496 (99.54)	11.00 (5.00, 21.00)			1730	38.4786
Recurrence	16 (0.35)	8.00 (3.75, 33.50)			7	43.75
Initial treatment failure or other situations	5 (0.11)	21.00 (17.00, 29.00)			4	80
Patient source			11.655	0.02			39.572	＜0.001
Direct medical consultation	159 (3.52)	9.00 (7.00, 18.00)			52	32.7044
Referral	3458 (76.55)	10.00 (5.00, 20.00)			1262	36.4951
Track	864 (19.13)	13.00 (5.00, 31.00)			412	47.6852
Physical examination	12 (0.27)	10.50 (4.50, 18.00)			4	33.3333
Proactive screening	24 (0.53)	13.00 (8.25, 23.00)			11	45.8333
Diagnostic classification			1.029	0.598			6.293	0.043
Sputum bacteria Positive	1551 (34.34)	11.00 (5.00, 23.00)			635	40.9413
Sputum bacteria negative	2881 (63.78)	10.00 (5.00, 21.00)			1071	37.1746
Tuberculous pleurisy	85 (1.88)	13.00 (8.00, 23.00)			35	41.1765
Therapeutic classification			-1.502	0.133			1.705	0.192
Initial treatment failure or other situations	4496 (99.54)	11.00 (5.00, 21.00)			1730	38.4786
Retreatment	21 (0.46)	17.00 (5.00, 31.00)			11	52.381
Total	4517 (100.00)	11.00 (5.00, 21.00)			1741	38.54

## Sheet: Table 2
Independent variable and constant	β Value	Standard deviation	Wald χ2	P Value	OR (95％CI)
Age
0～5					1
6～11	0.746	0.591	1.594	0.207	2.109（0.662－6.719）
12～17	0.138	0.555	0.062	0.804	1.148 (0.386－3.410)
≥18	0.284	0.553	0.264	0.607	1.329 (0.449－3.930)
Nation					0.155（0.076－0.318）
Han Chinese					1
Non-Han Chinese	0.698	0.26	7.198	0.007	2.009（1.207－3.344）
Patient source
Direct medical consultation
Referral	0.289	0.176	2.704	0.1	1.336(0.946－1.886)
Track	0.65	0.185	12.403	0	1.916(1.334－2.752)
Physical examination	0.116	0.644	0.032	0.857	1.123(0.318－3.967)
Proactive screening	0.412	0.45	0.836	0.36	1.509(0.625－3.648)
Diagnostic classification
Sputum bacteria negative					1
Sputum bacteria Positive	0.176	0.066	7.167	0.007	1.193（1.048－1.357）
Tuberculous pleurisy	0.11	0.228	0.231	0.631	1.116(0.713－1.746)
constant	-1.294	0.58	4.979	0.026	0.274

## Sheet: Figure 1
	男性			女性			全人群
年份	首诊延迟人数	总人数	首诊延迟比例	首诊延迟人数	总人数	首诊延迟比例	首诊延迟人数	总人数	首诊延迟比例
2012	168	386	0.435233	70	202	0.346535	238	588	0.404762
2013	139	343	0.405248	66	163	0.404908	205	506	0.405138
2014	105	294	0.357143	65	184	0.353261	170	478	0.355649
2015	90	243	0.37037	48	137	0.350365	138	380	0.363158
2016	116	318	0.36478	57	146	0.390411	173	464	0.372845
2017	110	277	0.397112	52	121	0.429752	162	398	0.407035
2018	67	178	0.376404	57	137	0.416058	124	315	0.393651
2019	84	186	0.451613	50	139	0.359712	134	325	0.412308
2020	54	162	0.333333	48	139	0.345324	102	301	0.33887
2021	43	156	0.275641	30	115	0.26087	73	271	0.269373
2022	45	112	0.401786	59	116	0.508621	104	228	0.45614
2023	58	137	0.423358	60	126	0.47619	118	263	0.448669
Year	Male	Female	Total
2012	0.435233	0.346535	0.404762
2013	0.405248	0.404908	0.405138
2014	0.357143	0.353261	0.355649
2015	0.37037	0.350365	0.363158	Percentage of students delayed seeking medical treatment for tuberculosis
2016	0.36478	0.390411	0.372845
2017	0.397112	0.429752	0.407035
2018	0.376404	0.416058	0.393651
2019	0.451613	0.359712	0.412308
2020	0.333333	0.345324	0.33887
2021	0.275641	0.26087	0.269373
2022	0.401786	0.508621	0.45614
2023	0.423358	0.47619	0.448669

## Sheet: Figure2
										首诊延迟					年龄层人数					首诊延迟比例
年份	3～11	12～17	≥18						年份	≤5	6～11	0～11	12～17	≥18	≤5	6～11	0～11	12～17	≥18	≤5	6～11	0～11	12～17	≥18
2012	0.666667	0.414634	0.398693						2012	0	4	4	51	183	0	6	6	123	459	#DIV/0!	0.666667	0.666667	0.414634	0.398693
2013	0.5	0.415929	0.404092						2013	0	1	1	47	158	0	2	2	113	391	#DIV/0!	0.5	0.5	0.415929	0.404092
2014	0.4	0.329897	0.361702						2014	0	2	2	32	136	0	5	5	97	376	#DIV/0!	0.4	0.4	0.329897	0.361702
2015	0.583333	0.240506	0.387543						2015	1	6	7	19	112	4	8	12	79	289	0.25	0.75	0.583333	0.240506	0.387543
2016	0.5	0.352941	0.376						2016	1	1	2	30	141	1	3	4	85	375	1	0.333333	0.5	0.352941	0.376
2017	0.375	0.445783	0.397394						2017	0	3	3	37	122	0	8	8	83	307	#DIV/0!	0.375	0.375	0.445783	0.397394
2018	0.375	0.402062	0.390476						2018	0	3	3	39	82	0	8	8	97	210	#DIV/0!	0.375	0.375	0.402062	0.390476
2019	0.5	0.363636	0.426471						2019	1	10	11	36	87	5	17	22	99	204	0.2	0.588235	0.5	0.363636	0.426471
2020	0.642857	0.341463	0.310976						2020	0	9	9	42	51	1	13	14	123	164	0	0.692308	0.642857	0.341463	0.310976
2021	0.285714	0.300971	0.248447						2021	0	2	2	31	40	1	6	7	103	161	0	0.333333	0.285714	0.300971	0.248447
2022	0.555556	0.469136	0.442029						2022	0	5	5	38	61	1	8	9	81	138	0	0.625	0.555556	0.469136	0.442029
2023	0.727273	0.37415	0.52381						2023	2	6	8	55	55	2	9	11	147	105	1	0.666667	0.727273	0.37415	0.52381
										5	52	57	457	1228	15	93	108	1230	3179	4517
